# Supplementary material for: Rice LEAFY COTYLEDONE1 regulates embryonic envelope development and chlorophyll biogenesis in embryo
Source: Research Square preprint supplement (doi:10.21203/rs.3.rs-888827/v1), 2021-09-22
Supplement: Supplementary file 1 [file cdaad00f6514118f2abb445f.xlsx]

## Sheet: Table S1
Supplemental Table 1. Differentially expressed genes in the 5-DAF-old embryos of osnf-yb7.
Locus ID	osnf-yb7 vs. WT - Fold change	osnf-yb7 vs. WT - Bonferroni	WT-1_RPKM	WT-2_RPKM	WT-3_RPKM	osnf-yb7-1_RPKM	osnf-yb7-2_RPKM	osnf-yb7-3_RPKM	Gene name	MSU Annotation
LOC_Os08g11669	0.00109004	3.30979e-10	9.68408	9.03448	11.2698	0	0	0.0326884		expressed protein
LOC_Os02g49370	0.00144839	0	32.1202	17.4484	17.6014	0.048398	0.0488903	0	OsHAP3E, OsLEC1/OsHAP3E, OsLEC1, OsNF-YB7, NF-YB7, NFYB7, L1L	HAP3 subunit of the CCAAT-box-binding transcription factor
LOC_Os05g25490	0.00409841	0	26.3539	26.0079	22.2158	0.151783	0.114995	0.0388709	OsACS4, OS-ACS4	aminotransferase, classes I and II, domain containing protein, expressed
LOC_Os10g32030	0.00519078	0	72.3891	74.3851	81.7846	0.527192	0.254173	0.405033		retrotransposon protein, putative, unclassified, expressed
LOC_Os01g21900	0.00523467	0.000193716	4.96718	10.047	8.2456	0	0	0.121757		expressed protein
LOC_Os07g15540	0.0053136	0	40.001	37.983	36.6059	0.290565	0.0419316	0.276389	PK3, OsPK3, OsETR4, OS-ETR4	ethylene receptor
LOC_Os05g18670	0.00581954	4.53817e-10	4.54121	4.64806	5.01331	0.0411172	0.0415354	0	SLAC	C4-dicarboxylate transporter/malic acid transport protein domain containing protein, expressed
LOC_Os08g33860	0.00677754	0	10.365	8.99191	9.76892	0.038725	0	0.158676		zinc finger, C3HC4 type, putative, expressed
LOC_Os11g37270	0.00765838	0	4107.85	6651.06	5283.17	75.8076	19.1612	27.8876	OsEnS-146, EnS-146, OsEnS146, EnS146	AMBP1 - Antimicrobial peptide MBP-1 family protein precursor, expressed
LOC_Os04g56230	0.00811642	0	32.8222	40.9223	40.9578	0.2957	0.298708	0.336565		polyprenyl synthetase, putative, expressed
LOC_Os09g26380	0.00954646	0	55.2138	73.4368	57.0303	1.17441	0.237271	0.360913	OsEnS-128, OsAlaAT5, AlaAT5	aminotransferase, classes I and II, domain containing protein, expressed
LOC_Os10g24480	0.010055	0.0210611	1.47939	3.50656	2.79657	0.0782534	0	0		retrotransposon, putative, centromere-specific, expressed
LOC_Os11g22630	0.0102815	0	3.98799	4.5556	5.37885	0.143143	0	0		expressed protein
LOC_Os01g67830	0.0118803	0	42.8848	38.0017	41.2012	0.560615	0.430401	0.459426		B3 DNA binding domain containing protein, expressed
LOC_Os07g29760	0.0122673	0	57.2226	70.9863	56.2734	1.34708	0.279134	0.636885	OsEnS-106	cysteine proteinase A494 precursor, putative, expressed
LOC_Os06g47260	0.0128945	3.9581e-10	4.5523	4.46253	6.02811	0.128878	0.0650942	0	OsRab5C1	ras-related protein, putative, expressed
LOC_Os08g11265	0.0152422	0	45.9193	34.7359	39.5984	0.941833	0.33979	0.551311		retrotransposon protein, putative, unclassified, expressed
LOC_Os08g10800	0.015408	0	46.0913	54.7382	53.6453	0.942954	0.833477	0.603714		expressed protein
LOC_Os01g29780	0.0156452	0	17.5697	31.9291	24.6206	0.720729	0.291224	0.14766		expressed protein
LOC_Os01g38520	0.0159056	7.52722e-09	2.58128	2.40889	2.2055	0.114452	0	0		expressed protein
LOC_Os03g62590	0.0168785	0	81.5007	93.7074	88.6124	2.76899	0.188997	1.49491	OsEnS-59	oxidoreductase, short chain dehydrogenase/reductase family domain containing protein, expressed
LOC_Os03g48020	0.0169174	0	3.09557	3.07041	3.37122	0.0641465	0.0971985	0		expressed protein
LOC_Os03g53350	0.017992	5.75154e-08	1.99545	2.59227	1.86472	0.0771332	0.0389589	0		anthocyanin 3-O-beta-glucosyltransferase, putative, expressed
LOC_Os05g10910	0.0182609	0.000602787	4.62478	1.14259	3.11661	0.0801377	0	0.0820914		expressed protein
LOC_Os11g22650	0.0210848	0	14.7794	15.6371	17.5423	0.500684	0.168592	0.341927		expressed protein
LOC_Os09g03380	0.0228689	2.32027e-09	1.23006	1.92868	1.46528	0.0526055	0.0531406	0		transposon protein, putative, Mutator sub-class, expressed
LOC_Os07g16610	0.023208	0	3.40756	4.44327	4.43793	0.0469131	0.142171	0.0961137		retrotransposon protein, putative, Ty1-copia subclass, expressed
LOC_Os04g43360	0.0234372	0	9.33614	13.5943	13.2967	0.195479	0.310306	0.343277	Os4bglu14, Os4Bglu14, Os4BGlu14	Os4bglu14 - monolignol beta-glucoside homologue without catalytic acid/base, expressed
LOC_Os03g09250	0.0245305	0	1420.98	1322.44	1233.47	38.3776	28.447	30.7306	OsINO1, MIPS, IPS, RINO1, OsINO1-1, OsRINO1, OsMIPS1, MIPS1	inositol-3-phosphate synthase, putative, expressed
LOC_Os01g35590	0.0251487	0	85.0817	100.724	97.9875	3.53608	1.51541	2.08556		expressed protein
LOC_Os08g07070	0.0260746	0	34.9982	32.6161	30.189	0.786888	0.715402	1.04789		expressed protein
LOC_Os05g49240	0.0266322	0	61.3888	48.34	54.999	1.64872	1.22721	1.51114		homeodomain-related, putative, expressed
LOC_Os03g17480	0.0278038	0	3.7916	3.18011	4.56164	0.158776	0.0534637	0.108431	OsGSTL1	IN2-1 protein, putative, expressed
LOC_Os03g06080	0.0280458	0	5.35533	8.48301	6.80215	0.448517	0.0647256	0.065636		heavy metal-associated domain containing protein, expressed
LOC_Os01g45290	0.0289932	1.14915e-07	0.666544	0.370021	0.548975	0.0227081	0	0.0232617		retrotransposon protein, putative, unclassified, expressed
LOC_Os05g35050	0.0302493	1.48705e-07	2.42815	2.94309	3.17254	0.192658	0	0.065785	COPT5, OsCOPT5	copper transporter gene
LOC_Os11g22449	0.0310947	0	9.32446	17.3071	12.0554	0.489543	0.211938	0.501478		expressed protein
LOC_Os06g42220	0.0313046	0	3.89292	4.45328	3.99143	0.230145	0.0774952	0.0785851		TOO MANY MOUTHS precursor, putative, expressed
LOC_Os03g42430	0.031691	0	8.92897	12.4338	11.8208	0.423655	0.233435	0.394531		B3 DNA binding domain containing protein, expressed
LOC_Os12g43140	0.0318859	0.000140412	1.75139	3.67056	2.55493	0.0838181	0.0846707	0.0858616	LEA D-34	late embryogenesis abundant protein D-34, putative, expressed
LOC_Os01g08020	0.0323106	0	92.8283	78.7937	86.021	3.35273	2.61068	2.36119	OsBOR3	efflux boron transporter gene
LOC_Os06g49970	0.0325248	0	2.72256	2.84468	3.26551	0.142512	0.0863769	0.0583945	Amy2A*(RAmy2A), AMY1.5, AMYC2, RAmy2A, Amy4, Amy2A	alpha-amylase precursor, putative, expressed
LOC_Os04g46760	0.0333692	0.000312775	2.51986	1.20726	1.18937	0	0.108862	0.0551967	OsTPP5	trehalose phosphatase, putative, expressed
LOC_Os09g27750	0.0344271	0	1580.99	1149.94	1192.78	48.445	42.3266	44.3104	OsACO2	aminocyclopropane-1-carboxylate oxidase gene
LOC_Os01g52680	0.0344699	0	32.2909	31.1982	29.0801	1.24451	1.06376	0.882587	OsMADS32, CFO1, CFO1/OsMADS32, TRI1, OsMADS32/CFO, CFO	MIKC-type MADS box gene; Chimeric Floral Organs1
LOC_Os05g20954	0.0352126	0	83.2495	86.2114	84.4912	2.85677	2.5873	3.49825		retrotransposon protein, putative, unclassified, expressed
LOC_Os07g22224	0.0352418	0	22.9817	42.7288	31.4788	1.55393	0.713517	1.15768		expressed protein
LOC_Os09g15700	0.0357661	0	61.3355	49.6456	57.2899	2.44448	1.34203	2.23189		receptor-like protein kinase 5 precursor, putative, expressed
LOC_Os09g21290	0.0357821	1.77432e-10	3.11476	2.85986	1.83873	0.138106	0	0.141472		expressed protein
LOC_Os01g50700	0.0363094	0	50.4948	120.394	65.7295	4.62742	1.18799	2.77605		dehydrin family protein, expressed
LOC_Os09g02180	0.0364689	0	162.464	245.892	182.056	8.43696	8.77344	4.32132		expressed protein
LOC_Os04g46200	0.0370508	0	3284.2	3937.86	3311.2	181.711	94.5091	114.046	ole16, OsEnS-72	oleosin, putative, expressed
LOC_Os03g55530	0.0381253	0	2.08136	1.60401	1.55202	0.0246095	0.0994392	0.0756284		HLS, putative, expressed
LOC_Os03g32490	0.0387712	0	4.34796	6.69882	5.65674	0.41398	0.139397	0.0942383		DUF1230 domain containing protein, expressed
LOC_Os07g10550	0.0408677	0	2.16687	1.78327	1.87143	0.0735725	0.104049	0.0602929		cyclin-related protein, putative, expressed
LOC_Os12g40730	0.0408799	0	21.3044	31.0501	25.6373	0.970093	1.25995	0.958253	OsbHLH116	helix-loop-helix DNA-binding domain containing protein, expressed
LOC_Os12g05890	0.0414092	0	5.00397	4.39003	3.83869	0.0598701	0.181437	0.306648		expressed protein
LOC_Os06g41030	0.0415476	0	22.1264	18.793	22.2711	1.3676	0.624516	0.6333		DUF1680 domain containing protein, putative, expressed
LOC_Os09g20440	0.045853	0.000155479	0.576914	1.27421	0.833967	0.0610326	0.0308267	0.0312603	sdh2-2	succinate dehydrogenase and fumarate reductase iron-sulfur protein, expressed
LOC_Os02g29590	0.0463601	0	16.0779	24.3929	19.9924	1.18878	0.667152	0.94715		expressed protein
LOC_Os05g06560	0.0465742	0	4.56318	6.62454	5.06636	0.327577	0.141818	0.287626		expressed protein
LOC_Os03g06920	0.0468201	0	1.64467	0.817635	0.926606	0.0787107	0.0477068	0.0322518	DRD1	DRD1, putative, expressed
LOC_Os05g16060	0.0471795	0	7.80114	12.9481	8.68638	0.847599	0.107028	0.434131		expressed protein
LOC_Os03g15530	0.0474405	0	51.6599	55.727	57.5428	3.29729	2.14124	2.38582		expressed protein
LOC_Os06g48050	0.047879	1.20321e-06	0.812594	0.831712	0.739181	0.0453707	0.0687482	0		expressed protein
LOC_Os02g47210	0.0483677	0	105.013	123.834	114.46	6.89148	4.92786	4.78565	OsPUT1, PUT, OsLAT1	polyamine uptake transporter
LOC_Os03g48010	0.0485655	0	4.20672	3.6964	4.52772	0.259254	0.201455	0.143002		exostosin, putative, expressed
LOC_Os05g27090	0.04908	0	37.2751	29.4614	28.3439	1.36536	1.46545	1.83573	OsbHLH162	basic helix-loop-helix domain containing protein, expressed
LOC_Os04g52750	0.0491283	0	707.425	1146.14	882.295	56.5772	36.3487	41.4822		expressed protein
LOC_Os03g49190	0.0493409	0	4331.63	5820.66	4853.98	307.117	211.278	222.028	ole18	oleosin, putative, expressed
LOC_Os01g28744	0.0493905	0	232.537	217.315	212.441	12.4929	11.0244	9.19361		retrotransposon protein, putative, unclassified, expressed
LOC_Os11g24280	0.0497095	0	8.10302	7.56616	8.50977	0.476239	0.432975	0.29271		retrotransposon protein, putative, unclassified
LOC_Os11g45320	0.0508703	3.41216e-11	3.93325	4.36128	4.84749	0.164708	0.166383	0.337447		expressed protein
LOC_Os10g35050	0.0516031	0	376.717	598.396	458.14	30.6782	22.3001	20.9819	OsTIP3;1, TIP3-1, TIP3.1, TIP3, OsEnS-139	aquaporin protein; tonoplast intrinsic protein
LOC_Os04g44570	0.0520878	0	42.479	50.3435	41.3008	3.16879	1.33861	2.47879	OsTIP3;2, TIP3-2, OsEnS-70	aquaporin protein, putative, expressed
LOC_Os01g09870	0.0523628	1.68933e-07	3.6879	4.99588	4.01038	0.218024	0	0.446679		expressed protein
LOC_Os06g21360	0.05269	0	83.725	90.0046	88.2838	4.69177	4.18191	4.9318	OsNHX4	transporter, monovalent cation%3Aproton antiporter-2 family, putative, expressed
LOC_Os04g58120	0.0530096	0	3.74563	6.9346	5.12056	0.276797	0.447379	0.113418		CRP2 - Cysteine-rich family protein precursor, expressed
LOC_Os03g15320	0.0531877	0	14.9841	11.2122	13.6846	0.929955	0.515162	0.676057		glyoxal oxidase-related, putative, expressed
LOC_Os05g31720	0.0536166	2.49088e-10	1.8939	1.80478	1.27629	0.0328174	0.0994537	0.13447	OsSTA148	stromal membrane-associated protein, putative, expressed
LOC_Os06g14670	0.054036	0	35.732	38.7414	39.4759	2.71029	1.66227	1.7848	R2R3-MYB	ODORANT1, putative, expressed
LOC_Os01g51610	0.0540684	0	48.7462	47.0486	47.3683	2.98172	2.5164	2.24248	OsLFL1, OsSTA29	transcription factor
LOC_Os01g54030	0.0544619	0	273.498	290.474	267.594	19.7411	10.5867	14.9608	OscytME3, OsEnS-13	NADP-dependent malic enzyme, putative, expressed
LOC_Os12g21540	0.0551394	0	2.21306	4.71902	3.26321	0.278021	0.0468081	0.237332		retrotransposon protein, putative, unclassified, expressed
LOC_Os05g20560	0.0553185	0	18.6909	29.2452	24.71	1.74828	1.12727	1.14313		retrotransposon protein, putative, unclassified, expressed
LOC_Os03g57960	0.0565117	0	1665.82	2424.01	1883.26	162.785	71.4409	103.324	OsEnS-57, EnS-57, CDP3.1	cupin domain containing protein, expressed
LOC_Os03g22130	0.0575003	0.030696	2.71767	1.85441	2.32405	0.130063	0	0.266467		expressed protein
LOC_Os07g30760	0.0581737	0	15.0578	16.6209	16.3919	1.31882	0.599504	0.87813	UGT709A4	UDP-glucoronosyl and UDP-glucosyl transferase domain containing protein, expressed
LOC_Os04g52550	0.0583884	1.16013e-10	0.756903	1.37189	0.616338	0.0475439	0.0640366	0.048703	OsAGO3	PAZ domain-containing protein, putative, expressed
LOC_Os06g26010	0.0591231	0	16.7416	25.5529	19.9607	1.62352	0.646074	1.41112		retrotransposon protein, putative, Ty3-gypsy subclass
LOC_Os02g30060	0.0592167	0	4.26014	4.10083	4.7146	0.305823	0.102978	0.365492		3-oxoacyl-reductase, chloroplast precursor, putative, expressed
LOC_Os08g24880	0.0597639	0	2.66709	2.24237	2.07954	0.223373	0.12894	0.0653768		EDM2, putative, expressed
LOC_Os01g19940	0.0605454	0	7.29118	13.537	10.5085	0.51124	0.745969	0.640082		expressed protein
LOC_Os05g30890	0.0605881	0	8.66998	9.73672	8.93614	0.484083	0.366755	0.805813		cytochrome P450, putative, expressed
LOC_Os03g34230	0.0608008	0.000102978	1.36472	2.23493	2.0904	0.137157	0.138552	0.0702504		expressed protein
LOC_Os12g06230	0.0612279	0.00340069	0.197525	0.235868	0.113024	0.00827153	0.0167113	0.00847318		retrotransposon protein, putative, unclassified, expressed
LOC_Os12g40590	0.0615507	0	6.23981	5.06044	6.15934	0.376953	0.311553	0.386143	OsbHLH135	helix-loop-helix DNA-binding domain containing protein, expressed
LOC_Os01g31040	0.0615514	0	3.8448	6.25529	5.51643	0.288365	0.466077	0.206777		retrotransposon protein, putative, unclassified, expressed
LOC_Os08g22990	0.0618147	8.6148e-05	0.345293	0.255923	0.377337	0.0119664	0.0362644	0.0122582		retrotransposon protein, putative, Ty3-gypsy subclass, expressed
LOC_Os10g21784	0.0621952	0	38.9212	64.6051	49.2788	4.13842	2.51976	2.84556		expressed protein
LOC_Os01g25630	0.0629924	1.25045e-05	0.533768	0.801278	0.394701	0.0178816	0.0361269	0.0549525		NB-ARC domain containing protein, expressed
LOC_Os02g49840	0.0630266	0	3.96441	1.99503	3.07113	0.332026	0.0670806	0.17006	OsMADS57, MADS-57	MADS-box gene
LOC_Os04g56240	0.0633216	0	59.2502	59.36	64.4755	4.34347	2.94397	4.30584		lipase, putative, expressed
LOC_Os12g03290	0.063463	0	44.5354	44.7418	46.3286	3.34075	2.39497	2.87023	AP2/EREBP#155	AP2 domain containing protein, expressed
LOC_Os07g15959	0.0638346	0	343.011	485.036	410.806	35.6274	16.9177	26.5366		expressed protein
LOC_Os01g57050	0.0661085	0.00573255	0.945711	1.27363	0.841284	0.0500241	0.101066	0.0512436		expressed protein
LOC_Os11g03540	0.0664371	0	47.0395	47.9899	46.0129	3.34613	3.1941	2.83022	AP2/EREBP#131	AP2 domain containing protein, expressed
LOC_Os09g30240	0.0665942	0	6.52281	9.86928	6.77818	0.997584	0.143961	0.401462	OsEnS-130, OsPFK09, PFK09, PFK9	phosphofructokinase, putative, expressed
LOC_Os07g45180	0.0672333	0	14.6935	13.8839	12.9242	0.891299	0.716199	1.18279		transposon protein, putative, unclassified, expressed
LOC_Os07g34070	0.0673567	0	4.2324	2.99022	4.62927	0.338786	0.228155	0.231363		auxin-induced protein 5NG4, putative, expressed
LOC_Os09g20400	0.0675158	0	45.278	66.456	52.6589	3.4551	2.697	4.94702	OsEnS-127	expressed protein
LOC_Os03g42420	0.0677333	0	21.8237	20.6629	23.4754	1.20292	1.49869	1.76622		B3 DNA binding domain containing protein, expressed
LOC_Os03g28270	0.0693308	0	3.25168	3.31518	3.68993	0.191484	0.245014	0.274614		Leucine Rich Repeat family protein, expressed
LOC_Os08g01490	0.0699654	0.0316764	0.731427	0.490486	0.239791	0.0506964	0.0256061	0.0259662		cytochrome P450, putative, expressed
LOC_Os01g46760	0.0703142	0	42.4108	47.3684	40.2184	3.48838	3.04668	2.60563	OsPP2C08, PP2C08, OsPP2C8, PP2C8, OsPP12	protein phosphatase 2C, putative, expressed
LOC_Os01g45624	0.0704604	0	12.3848	13.9109	13.083	1.37402	0.48988	0.910746		oleosin, putative, expressed
LOC_Os01g21490	0.0709193	3.67583e-06	0.871227	1.37189	1.09733	0.168385	0.0340195	0.0344979		transposon protein, putative, CACTA, En/Spm sub-class
LOC_Os09g09040	0.0709975	0	247.642	356.888	305.537	28.0166	13.0975	23.4984		expressed protein
LOC_Os12g40120	0.0714021	0	6.88794	7.42106	6.3462	0.468441	0.473205	0.533179		B3 DNA binding domain containing protein, expressed
LOC_Os04g50740	0.0716643	0	2.81611	2.88237	3.32486	0.194233	0.168179	0.28424		ara54-like RING finger protein, putative, expressed
LOC_Os03g20480	0.0717368	0	19.2075	19.9312	23.4694	1.42333	2.15671	0.911266		expressed protein
LOC_Os02g56500	0.0724843	0	33.2225	37.2128	34.9338	2.67037	2.23177	2.73547	OsSEC24, OsSEC27, SEC24, SEC27	expressed protein
LOC_Os03g12260	0.0728602	0	5.18101	5.73056	5.79676	0.335936	0.537309	0.344126		cytochrome P450 protein, putative, expressed
LOC_Os09g16030	0.0730526	0	2.12253	3.5019	2.30912	0.159193	0.2573	0.163074		cytokinin-O-glucosyltransferase 1, putative, expressed
LOC_Os05g04870	0.0732896	0	60.7219	147.997	66.3333	14.4913	1.40201	4.2652		oxidoreductase, short chain dehydrogenase/reductase family protein, putative, expressed
LOC_Os03g42730	0.0734207	0.0169823	0.904332	0.97189	0.620954	0.0908871	0.0459058	0.0465514		expressed protein
LOC_Os03g51920	0.0735799	7.95033e-10	1.17167	1.86858	1.0938	0.164309	0.0276635	0.11221		peptidase, M50 family, putative, expressed
LOC_Os04g44090	0.0743519	0	1.75347	2.19124	2.19694	0.163933	0.0828	0.209911	OsSTA127	expressed protein
LOC_Os03g53620	0.074518	0	4.86677	13.9773	6.90599	0.876035	0.294982	0.747826	OsLEA32, OsEnS-55	late embryogenesis abundant protein D-34, putative, expressed
LOC_Os09g32440	0.0745684	0	2.84317	2.65329	2.50876	0.184893	0.0848971	0.327146		endonuclease/exonuclease/phosphatase family domain containing protein, expressed
LOC_Os12g36680	0.0750789	0	30.8678	29.7194	33.7746	2.97775	1.77748	2.32935		expressed protein
LOC_Os06g41930	0.075871	0	2.17021	1.52545	1.90586	0.15767	0.132728	0.134595		zinc-binding protein, putative, expressed
LOC_Os01g53650	0.0760813	3.41216e-12	2.63702	5.98489	3.57294	0.576143	0.174601	0.177057	OsC3H10, OsTZF8, OsCCCH-Zn-2, OsEnS-12	zinc finger CCCH type family protein, putative, expressed
LOC_Os11g38650	0.076723	0	14.6092	12.367	12.3288	1.04875	0.86426	1.10259		UDP-glucoronosyl/UDP-glucosyl transferase, putative, expressed
LOC_Os04g55710	0.0768677	0	25.7717	30.9832	29.9243	2.09813	2.15602	2.40868	OsASNase2, ASNase2	transposon protein, putative, unclassified, expressed
LOC_Os04g32070	0.0774628	0	92.9911	109.79	97.7648	9.11882	5.52695	8.63536	OsEnS-62	dehydrogenase/reductase, putative, expressed
LOC_Os04g42590	0.0790344	0	10.8449	11.6718	13.4003	0.792676	1.26784	0.778167		expressed protein
LOC_Os04g01250	0.0790762	5.63962e-08	0.944146	1.03884	0.748029	0.0711663	0.0718902	0.0729013	FAAH	amidase family protein, putative, expressed
LOC_Os03g19290	0.0791034	0	671.251	743.742	651.189	59.8209	49.0417	54.5794		mitochondrial import inner membrane translocase subunit Tim17, putative, expressed
LOC_Os07g09190	0.0794098	0	8.80401	6.76338	6.73187	0.67002	0.676835	0.423925	OsDXS, OsDXS3, dxs3	transketolase, putative, expressed
LOC_Os04g35270	0.0794715	0	4.59884	4.4969	3.51344	0.247603	0.458556	0.295912		alpha-1,4-fucosyltransferase, putative, expressed
LOC_Os05g35690	0.0797056	0	117.434	176.106	132.877	8.8979	13.5674	11.5225		GASR6 - Gibberellin-regulated GASA/GAST/Snakin family protein precursor, expressed
LOC_Os11g03700	0.0803047	0	1.94703	3.177	2.38469	0.141798	0.257832	0.203356	OsSET40, SDG733, OsSUVH11	Histone H3K9 Methyltransferase Gene
LOC_Os01g19770	0.0805551	0	320.083	425.005	340.864	37.1006	20.9897	29.3886		mitochondrial import inner membrane translocase subunit Tim17, putative, expressed
LOC_Os07g02430	0.0806663	0.000343278	0.747971	1.93407	0.790138	0.079129	0.119901	0.0810581	OsSTA185	expressed protein
LOC_Os04g55100	0.0808933	0	8.64489	11.0604	11.3066	0.620591	1.35829	0.529767		expressed protein
LOC_Os06g24430	0.0811549	0	228.427	325.308	277.233	28.8326	15.5704	23.034		expressed protein
LOC_Os05g13380	0.0812634	8.05737e-07	0.905059	1.45129	1.01982	0.21224	0	0.0621185		retrotransposon protein, putative, unclassified, expressed
LOC_Os04g56700	0.0814143	0	4.13282	5.54426	5.25593	0.846844	0.20368	0.165236	OsF3H-1, F3H-1, OsF3H1, OsF3H, F3H	naringenin,2-oxoglutarate 3-dioxygenase, putative, expressed
LOC_Os08g43500	0.0828594	0	1.83955	1.3384	1.45159	0.111373	0.112505	0.159723		armadillo/beta-catenin repeat family protein, putative, expressed
LOC_Os01g45380	0.0835286	0	17.6451	23.9691	19.9491	1.73731	1.42385	1.98113		protein kinase domain containing protein, expressed
LOC_Os04g56210	0.0839539	0	33.4091	41.3225	33.8874	2.71288	2.70075	3.70535	OsFPPS3	polyprenyl synthetase, putative, expressed
LOC_Os08g43530	0.0839877	4.96519e-05	1.53575	1.03155	1.47023	0.192932	0.146171	0		OsFBX306 - F-box domain containing protein, expressed
LOC_Os12g05990	0.0840853	0.00960378	1.13904	0.538078	0.971855	0.088058	0.0444768	0.0902047	ONAC134	No apical meristem protein, putative, expressed
LOC_Os09g21919	0.0845007	0	11.7767	18.2366	18.7682	1.78558	1.08224	1.25424		expressed protein
LOC_Os05g13620	0.0854381	0.00523307	1.27942	1.44737	1.28042	0.135352	0.0683645	0.138652		RNA recognition motif containing protein, putative, expressed
LOC_Os01g32864	0.0862698	0	66.0263	64.5363	65.1795	6.38447	5.21441	5.28775		retrotransposon protein, putative, unclassified, expressed
LOC_Os05g49440	0.0864084	0	273.679	387.733	303.517	34.338	19.0362	30.0037		DUF1264 domain containing protein, putative, expressed
LOC_Os03g53690	0.0864202	0	38.262	37.8028	31.9467	3.74786	2.90431	2.6822		oxidoreductase, short chain dehydrogenase/reductase family domain containing protein, expressed
LOC_Os03g46100	0.086508	0	1608.3	3131.19	2058.09	267.717	125.591	194.737	OsEnS-51	cupin domain containing protein, expressed
LOC_Os01g74000	0.0879405	0	97.6068	81.6872	92.1758	7.89724	8.0371	7.93884	OsSTA45	glycerol-3-phosphate dehydrogenase, putative, expressed
LOC_Os01g02120	0.0881202	0	367.97	430.041	389.785	43.653	24.6488	36.367	OsMFT2	osMFT2 MFT-Like2 homologous to Mother of FT and TFL1 gene%3B contains Pfam profile PF01161%3A Phosphatidylethanolamine-binding protein, expressed
LOC_Os01g55350	0.0883581	0	32.1421	20.4437	21.8776	1.81314	2.03716	2.72915	Osppc3, Osppc2, ppc3, ppc2	phosphoenolpyruvate carboxylase, putative, expressed
LOC_Os04g35430	0.088621	0	19.5889	19.9214	20.7595	1.55127	1.51609	2.27382		PHD-finger domain containing protein, expressed
LOC_Os02g53620	0.088693	0	73.4405	56.9232	61.3154	5.27208	5.17777	6.55074	OsHAP2K, NF-YA11, OsNF-YA11, NFYA11	nuclear transcription factor Y subunit, putative, expressed
LOC_Os03g11140	0.0890887	0	19.2303	14.5185	15.504	1.46705	1.38532	1.53549	Spin6.3	pleckstrin homology domain-containing protein-related taxo, putative, expressed
LOC_Os01g53990	0.0892144	0	67.4813	66.384	66.1891	6.72745	6.12241	4.99786	OsPME5	pectinesterase, putative, expressed
LOC_Os01g41720	0.0897675	0	8.17706	5.76859	6.71083	0.753053	0.396894	0.704333	OsEnS-10	expressed protein
LOC_Os01g05150	0.0901605	0	29.2002	36.7125	32.3294	2.9629	2.20914	3.68552		expressed protein
LOC_Os09g03570	0.0903509	0	2.12708	1.81924	1.93918	0.234274	0.177493	0.119993		retrotransposon, putative, centromere-specific, expressed
LOC_Os03g14790	0.091962	3.41216e-12	1.12327	0.881438	1.10749	0.0752607	0.0760262	0.134917		piwi domain containing protein, putative, expressed
LOC_Os03g02670	0.0922686	0	12.3688	15.7392	14.973	1.27668	1.45936	1.23898		transporter family protein, putative, expressed
LOC_Os03g48310	0.0923703	0	20.9984	20.6092	21.6996	2.04066	1.80374	2.00331	OSA1, OsA1, osAHA1, AHA1	plasma membrane ATPase, putative, expressed
LOC_Os08g34780	0.0930884	0	1.35594	2.0339	1.45707	0.140973	0.189876	0.120342		adenylyl cyclase-associated protein, putative, expressed
LOC_Os06g22080	0.0932321	0	108.279	155.786	120.059	11.8079	11.1189	12.886		diacylglycerol O-acyltransferase, putative, expressed
LOC_Os03g06360	0.0937611	0	304.761	333.607	304.245	34.7528	20.1567	33.4709	OsLEA30, OsEnS-43	late embryogenesis abundant protein D-34, putative, expressed
LOC_Os01g04670	0.0945694	0	8.2434	6.49027	5.73099	0.49567	0.786833	0.652827		expressed protein
LOC_Os02g48710	0.0957515	0	299.583	347.198	320.189	31.0967	28.8915	32.6006	OsAGP21	expressed protein
LOC_Os07g48460	0.09649	0	19.3437	29.6449	25.0933	3.38556	1.93917	1.82343		stress responsive protein, putative, expressed
LOC_Os08g45200	0.0966123	0	1.82829	2.97708	2.35275	0.283972	0.219364	0.188226		expressed protein
LOC_Os06g25910	0.0966913	0	1.34326	1.04156	1.18965	0.0681818	0.137751	0.139688		retrotransposon protein, putative, Ty1-copia subclass, expressed
LOC_Os05g48140	0.09684	3.85516e-07	0.500266	0.466857	0.575098	0.0443627	0.0746899	0.0302962		expressed protein
LOC_Os05g50770	0.0972094	1.52182e-09	0.904332	2.08262	1.22068	0.151479	0.0765096	0.181033	SLAC	C4-dicarboxylate transporter/malic acid transport protein, expressed
LOC_Os08g12449	0.0997533	0	122.701	171.869	147.441	17.0702	12.2841	14.7377		expressed protein
LOC_Os11g24260	0.0998067	0	34.0548	37.0917	39.226	3.29286	3.22555	4.49751		retrotransposon protein, putative, Ty3-gypsy subclass
LOC_Os03g42130	0.0998776	0	42.5108	40.0369	44.951	5.36652	3.36192	4.00582		gibberellin 20 oxidase 2, putative, expressed
LOC_Os12g42830	0.0999792	0	2.4412	2.1976	2.23705	0.266037	0.179162	0.242243		expressed protein
LOC_Os05g43390	0.100193	0	3.10329	3.6221	2.93315	0.300943	0.414551	0.252229		signal recognition particle 54 kDa protein, putative, expressed
LOC_Os12g07700	0.100292	0	3.05019	3.34104	3.3352	0.537806	0.217311	0.220367	OsISC14	nifU, putative, expressed
LOC_Os02g20850	0.100408	0	12.0809	15.0422	12.4989	1.50205	1.70699	0.769335	OSRAC7, OsRac7, ROP5, OsRop5	ras-related protein, putative, expressed
LOC_Os12g38340	0.100424	0	20.1429	24.128	21.6502	2.29845	1.78602	2.5356	OsRALF-40, OsRALF40, RALF-40	RALFL42 - Rapid ALkalinization Factor RALF family protein precursor, expressed
LOC_Os02g19640	0.100469	0	4.26048	3.39879	4.66613	0.598201	0.34985	0.290267		IQ calmodulin-binding motif family protein, putative, expressed
LOC_Os11g14040	0.100779	0	9.18417	10.3744	9.65166	1.38693	0.772987	0.783859	OsGSTZ4	glutathione S-transferase, N-terminal domain containing protein, expressed
LOC_Os07g06600	0.100955	0	13.5089	15.5256	17.7772	1.85347	1.63828	1.23413	OsGRL14	glutaredoxin, putative, expressed
LOC_Os12g16290	0.101573	0	1.39959	1.57179	1.29368	0.175827	0.197351	0.0600379		isoflavone reductase, putative, expressed
LOC_Os07g49210	0.101614	0	22.3364	24.3405	24.0945	2.45705	2.32221	2.41208		helicase conserved C-terminal domain containing protein, expressed
LOC_Os01g29104	0.10221	0	77.6161	104.719	98.1956	11.485	7.39715	9.79102		expressed protein
LOC_Os03g63930	0.102824	0	149.619	138.337	138.442	15.7913	12.7006	15.352		acyl carrier protein, putative, expressed
LOC_Os03g51990	0.103284	4.39715e-07	1.01983	1.35697	1.29279	0.20499	0.069025	0.104994	OsSTA113	ACT domain containing protein, expressed
LOC_Os11g22150	0.103383	0	376.509	356.593	362.242	36.8682	40.7935	35.5787		retrotransposon protein, putative, unclassified, expressed
LOC_Os04g32080	0.103899	0	25.6744	40.5717	27.4292	5.48229	1.25529	2.99517		11-beta-hydroxysteroid dehydrogenase, putative, expressed
LOC_Os01g62970	0.103949	0.00198319	0.594785	0.859453	0.923994	0.140652	0.106562	0		expressed protein
LOC_Os03g55100	0.104609	0	20.2532	19.3163	20.155	2.08175	1.98609	2.17989	OsCNGC7, OsCNGC14	cyclic nucleotide-gated ion channel 2, putative, expressed
LOC_Os02g19720	0.104635	5.59799e-08	0.739378	1.56574	1.40052	0.230614	0.0258844	0.131242		retrotransposon protein, putative, unclassified, expressed
LOC_Os05g13320	0.105029	0.0014393	0.625786	0.667198	0.468254	0.104821	0.0264718	0.0536883	SLAC	C4-dicarboxylate transporter/malic acid transport protein, expressed
LOC_Os04g28860	0.105747	2.36579e-07	0.781057	0.659533	0.804462	0.156995	0	0.0804114		expressed protein
LOC_Os03g14210	0.105926	0	16.5178	16.187	17.5165	2.3119	1.29745	1.71041		glycosyl hydrolases family 17, putative, expressed
LOC_Os08g10510	0.105965	0	57.3912	41.5241	50.9365	4.81108	5.89175	5.17617		aminotransferase, putative, expressed
LOC_Os08g14400	0.108938	0	14.9969	11.8004	12.2267	1.67469	1.41739	1.15913	OsWOX10, Os WOX10, OsWOX11/12, OsWOX11	homeobox domain containing protein, expressed
LOC_Os11g07911	0.109511	0	45.7746	95.5936	58.3654	8.23235	5.95171	7.68896		expressed protein
LOC_Os01g55310	0.109643	0	8.73828	10.8358	8.99421	1.12592	0.853025	1.15336		haloacid dehalogenase-like hydrolase domain-containing protein 1A, putative, expressed
LOC_Os08g37730	0.110125	0	51.3097	45.0093	46.4161	4.97422	4.95251	5.79199	OsbHLH047	helix-loop-helix DNA-binding protein, putative, expressed
LOC_Os06g09600	0.110968	0	15.3026	9.41384	10.8048	1.59372	1.36845	0.979547		expressed protein
LOC_Os04g12370	0.11108	0	37.6601	51.4838	45.4272	6.54829	3.70434	4.69555		expressed protein
LOC_Os10g39140	0.111582	0	65.2209	44.999	48.7564	6.74621	5.96901	5.02372	OsF3H-2, F3H-2, OsF3H2	flavonol synthase/flavanone 3-hydroxylase, putative, expressed
LOC_Os07g35020	0.111617	0	25.1502	38.6796	39.3702	4.05994	3.83664	3.62228		expressed protein
LOC_Os08g01950	0.111617	0	1.99083	1.56744	1.74716	0.123128	0.279855	0.189194		transferase family protein, putative, expressed
LOC_Os04g53810	0.113016	0.000815846	1.02226	0.649434	0.856462	0.106282	0.14315	0.0362909		leucoanthocyanidin reductase, putative, expressed
LOC_Os07g43316	0.113689	0	44.682	46.1662	50.3084	5.50701	4.87984	5.66106		SAP domain-containing protein, putative, expressed
LOC_Os05g37060	0.114306	0.002226	1.0884	1.91858	1.27751	0.303852	0.0613885	0.124504	OsMYB-1, MYB-1, MYB1, OsARM1, ARM1	MYB family transcription factor, putative, expressed
LOC_Os05g06399	0.114593	0	147.213	209.395	182.61	22.7325	16.3568	22.7013		expressed protein
LOC_Os01g19780	0.115088	0.00154077	2.26347	1.41993	1.4655	0.146763	0.37064	0.0751706		expressed protein
LOC_Os05g48210	0.115766	3.25707e-06	2.10388	1.82711	2.22248	0.320369	0.129451	0.262544		expressed protein
LOC_Os08g23870	0.116469	0	194.722	416.352	239.146	46.8898	17.0575	35.0771	OsLEA4	late embryogenesis abundant group 1, putative, expressed
LOC_Os01g10370	0.11681	4.9333e-08	1.83032	2.07591	2.50833	0.397731	0.351554	0	OsERF#039, OsERF039, OsERF39, AP2/EREBP#002, AP2/EREBP2	AP2 domain containing protein, expressed
LOC_Os10g33190	0.116913	0	200.681	291.57	242.356	30.6484	23.6078	31.6285		expressed protein
LOC_Os08g16860	0.117788	0	4.35659	6.4366	4.28204	0.533029	0.384608	0.858038	OsFbox433, Os_F0239	OsFBX282 - F-box domain containing protein, expressed
LOC_Os08g06450	0.117825	0	2.77226	3.34091	2.7396	0.539259	0.181581	0.322237		cytidylyltransferase domain containing protein, expressed
LOC_Os03g35640	0.117968	0	5.6564	9.05182	8.10931	0.992583	0.774797	0.924347		retrotransposon protein, putative, unclassified, expressed
LOC_Os05g25040	0.11841	0	30.4445	44.6468	38.3531	5.59934	3.53854	4.29509		expressed protein
LOC_Os08g03410	0.118651	0	4733.3	8239.73	5807.99	834.235	651.468	742.686	OsEnS-115	glutelin, putative, expressed
LOC_Os04g40410	0.118693	0	12.3386	12.9876	11.8492	1.90235	1.13878	1.37133	OsNAR2.2, OsNRT3.1B	high affinity nitrate transporter, putative, expressed
LOC_Os06g02490	0.118754	0	18.7649	29.6826	18.9217	3.64323	2.38136	1.97579	OsACBP2, ACBP2	acyl-CoA-binding protein
LOC_Os01g04380	0.119475	6.93317e-07	2.3345	3.07211	1.97288	0.335173	0.203149	0.343344	Oshsp16.9B, OsHsp16.9B, HSP16.9B, OsHsp17.0, OsHSP16.9B-CI, OsHSP17.0, OsSHSP2, OsSTA3	rice heat shock protein gene
LOC_Os03g21790	0.119649	0	256.9	356.882	292.007	40.4976	32.225	35.6546	CDP3.2	cupin domain containing protein, expressed
LOC_Os05g31280	0.120077	0	28.1473	20.6389	21.7393	3.12581	3.36812	1.97458		GASR5 - Gibberellin-regulated GASA/GAST/Snakin family protein precursor, expressed
LOC_Os11g24270	0.120162	0	2.57753	2.53621	2.7886	0.312858	0.303399	0.333305		retrotransposon protein, putative, Ty3-gypsy subclass, expressed
LOC_Os04g51796	0.120813	0	10.2804	17.2589	12.6136	1.84396	1.50791	1.49913		DNA repair ATPase-related, putative, expressed
LOC_Os03g10110	0.121006	0	1655.95	2165.87	2055.89	245.162	215.717	250.361		cupin domain containing protein, expressed
LOC_Os01g60810	0.122372	0	11.0531	7.61008	9.71268	1.0675	1.51643	0.888485	OsOFP4, OFP4, OsOFP06, OsOFP6, OFP6	DUF623 domain containing protein, expressed
LOC_Os04g15650	0.123227	0.015089	0.27998	0.38209	0.41407	0.0562771	0.0378997	0.0384327		Leucine Rich Repeat family protein, expressed
LOC_Os04g35810	0.123288	2.2179e-10	3.54759	6.01992	5.81862	0.656784	0.663464	0.576682		expressed protein
LOC_Os09g39730	0.123679	0	29.3372	49.1126	36.4314	7.10339	1.80292	5.30202		Core histone H2A/H2B/H3/H4 domain containing protein, putative, expressed
LOC_Os01g59100	0.123991	0	10.596	14.7941	11.1647	1.31067	1.62742	1.59436	OsEnS-18	cytokinin-N-glucosyltransferase 1, putative, expressed
LOC_Os06g20020	0.124818	3.887e-05	1.51679	0.975845	1.3734	0.261327	0.131992	0.0892326		ZOS6-03 - C2H2 zinc finger protein, expressed
LOC_Os12g07640	0.124896	0	3.75298	3.61795	3.27306	0.5263	0.39874	0.404348	R2R3-MYB	Rice MYB
LOC_Os03g10440	0.125207	0	2.84268	2.68575	2.77194	0.29302	0.296	0.450245		glycosyl hydrolase family 10 protein, putative, expressed
LOC_Os05g28350	0.125692	0	13.322	12.1204	10.8968	1.39467	1.26797	1.9049	OsERF#117, OsERF117, AP2/EREBP#150, AP2/EREBP150, OsABI4	AP2 domain containing protein, expressed
LOC_Os06g04480	0.126282	0.00160437	1.16432	2.20466	1.29145	0.409556	0.0591031	0.119869		expressed protein
LOC_Os06g32610	0.126467	0	19.131	30.4492	23.884	3.95581	2.60207	2.73291		expressed protein
LOC_Os02g49986	0.126476	1.04697e-06	2.43656	2.02628	1.66232	0.0510164	0.566889	0.156781	R2R3-MYB	MYB family transcription factor, putative, expressed
LOC_Os02g35660	0.126541	0	2.82697	3.78378	3.87649	0.409782	0.441547	0.475742	OsbHLH097	PTF1, putative, expressed
LOC_Os02g38090	0.126908	0	3.25403	3.3861	3.32289	0.654072	0.275302	0.335009	OsERF#079, OsERF079, OsERF79, AP2/EREBP#017, AP2/EREBP17	AP2 domain containing protein, expressed
LOC_Os03g20120	0.128066	0	5.10698	6.75508	5.56089	0.71067	1.15661	0.363998	OsGolS1, GolS1	glycosyl transferase 8 domain containing protein, putative, expressed
LOC_Os02g50050	0.129059	0	13.8572	13.5627	14.8213	2.17605	1.67062	1.60495		expressed protein
LOC_Os01g66850	0.12934	0	29.195	18.2532	20.1671	3.27577	3.07273	2.39688		pectinacetylesterase domain containing protein, expressed
LOC_Os10g40660	0.12943	4.10824e-09	1.39739	1.39621	1.6519	0.16719	0.202669	0.20552		ZOS10-07 - C2H2 zinc finger protein, expressed
LOC_Os08g15020	0.129526	0	4.65857	3.16393	4.46127	0.568835	0.618823	0.40341		MYB family transcription factor, putative, expressed
LOC_Os02g58170	0.130332	0	5.23671	4.5336	5.67023	1.07453	0.39874	0.539131		transposon protein, putative, unclassified, expressed
LOC_Os01g54520	0.130437	0	61.7454	92.3431	68.5616	13.5606	4.68713	10.794	OsSTA32	DUF1264 domain containing protein, putative, expressed
LOC_Os06g47250	0.131112	0	19.1101	15.8749	17.5305	2.52776	2.4283	1.92935		DUF292 domain containing protein, expressed
LOC_Os04g43170	0.131582	0	912.329	1267.95	1009.52	167.535	109.311	142.875	OsEnS-68	caleosin related protein, putative, expressed
LOC_Os12g40090	0.132527	3.23473e-09	3.05346	3.52307	1.93536	0.390573	0.394545	0.342938		B3 DNA binding domain containing protein, expressed
LOC_Os11g22350	0.133567	1.66172e-08	0.579728	0.702673	0.805803	0.137993	0.0309771	0.109945	OsABCG28, OsSTA255	white-brown complex homolog protein, putative, expressed
LOC_Os02g49510	0.133681	0.00114021	0.447619	0.727651	0.834447	0.0529254	0.0801956	0.135539	OsATL3	amino acid transporter, putative, expressed
LOC_Os03g04080	0.133833	0	27.3041	71.6747	36.5632	5.73036	5.29947	7.11022		expressed protein
LOC_Os02g26720	0.134578	0	6.53745	10.0741	9.36146	1.86157	0.8112	0.822609	OsITPK4, OsITP5/6K-4, ITP5/6K-4	inositol 1,3,4-trisphosphate 5/6-kinase gene
LOC_Os01g62605	0.134668	0	5.48811	4.85125	5.97318	0.752135	0.759785	0.684863		expressed protein
LOC_Os09g09420	0.134723	0	0.70088	1.14779	1.21424	0.183143	0.0996188	0.129883		transposon protein, putative, CACTA, En/Spm sub-class, expressed
LOC_Os10g14020	0.134988	0	121.148	45.2134	63.4126	10.7959	8.74786	11.473		TPD1, putative, expressed
LOC_Os04g58390	0.135206	0	16.6391	14.746	16.3522	2.18501	2.00123	2.26812	OsALN	allantoinase, putative, expressed
LOC_Os08g36390	0.135404	0	2.82703	2.86838	2.9864	0.370593	0.349405	0.455554	OsIDD12	ZOS8-07 - C2H2 zinc finger protein, expressed
LOC_Os04g26350	0.135621	1.46433e-06	0.557729	0.589266	0.741215	0.0904079	0.0730619	0.0926119		Leucine Rich Repeat family protein, expressed
LOC_Os01g62140	0.135679	0.0002867	1.35171	3.01117	2.77183	0.399557	0.322897	0.245579		retrotransposon, putative, centromere-specific, expressed
LOC_Os12g40100	0.135958	5.79729e-07	1.90309	2.51338	2.46433	0.370189	0.249303	0.316012		expressed protein
LOC_Os03g53390	0.136346	0	3.3022	3.1653	3.70985	0.263395	0.638578	0.485669		expressed protein
LOC_Os03g14915	0.136823	0.000200207	1.73138	1.1139	1.20191	0.149149	0.200888	0.203714		expressed protein
LOC_Os08g22604	0.13698	0	500.094	549.9	552.92	76.2297	72.6894	70.6482		expressed protein
LOC_Os08g07730	0.137429	1.67464e-05	1.48829	1.06632	1.02193	0.112182	0.264421	0.114917		transferase family protein, putative, expressed
LOC_Os03g16170	0.138377	0	26.4633	24.5312	26.0174	4.01964	3.57204	3.06501	OsPP2C30, PP2C30, OsPP48, PP48	protein phosphatase 2C, putative, expressed
LOC_Os01g27449	0.138712	0	142.447	191.55	173.199	28.7839	19.2471	22.3231		expressed protein
LOC_Os06g42210	0.13941	0.000184491	2.14245	1.81478	1.95106	0.44549	0.150007	0.228175		expressed protein
LOC_Os03g15330	0.13945	1.61225e-08	4.83875	6.88531	4.61284	0.830274	0.718902	0.729013		expressed protein
LOC_Os12g22489	0.139831	0	230.766	335.646	286.051	40.8308	37.7319	40.6384		expressed protein
LOC_Os06g30179	0.140366	0	5.34105	6.94273	6.48847	0.885697	0.732032	1.01726		cytochrome P450, putative, expressed
LOC_Os05g28690	0.140536	0	1.78813	1.84625	1.6901	0.236461	0.350337	0.161484		expressed protein
LOC_Os09g15520	0.140549	0	314.3	356.491	308.926	51.5073	36.8153	49.376	OsOLE4, Os-OLE4	oleosin, putative, expressed
LOC_Os03g07000	0.140575	8.22156e-07	3.23871	1.68759	2.3016	0.355087	0.418482	0.242496		oxidoreductase, putative, expressed
LOC_Os02g30080	0.140953	0	6.56415	7.08373	5.91668	0.752929	1.08655	0.918196		cytochrome P450, putative, expressed
LOC_Os03g37470	0.141066	5.22264e-06	1.00814	1.7748	1.57616	0.202641	0.204702	0.207581		MATE efflux family protein, putative, expressed
LOC_Os08g39250	0.141313	0	2.23935	2.14348	1.73038	0.270904	0.336812	0.256162		EDM2, putative, expressed
LOC_Os02g43620	0.141502	0	6.99584	9.78967	7.18816	1.09859	0.943297	1.35044		transporter, major facilitator family, putative, expressed
LOC_Os04g55490	0.142076	1.02365e-11	2.75709	3.1298	2.7007	0.554185	0.35625	0.309652		expressed protein
LOC_Os10g39610	0.142552	0	284.103	380.623	291.004	53.769	43.5529	38.9197	OsMT4, OsMT-II-1a, MT4, MT-II-1a	rice class II metallothionein gene
LOC_Os02g33380	0.143888	0	13.2381	19.5194	14.8844	2.83216	1.79642	2.2265		pectinesterase inhibitor domain containing protein, putative, expressed
LOC_Os01g43530	0.144006	0.000478739	2.79918	2.86504	2.4094	0.104194	0.631522	0.426936	OsLEA6	late embryogenesis abundant protein, putative, expressed
LOC_Os02g21330	0.145054	2.33425e-06	2.45233	1.5618	2.07247	0.383389	0.387288	0.11221		expressed protein
LOC_Os02g15250	0.145463	0	59.9983	111.792	72.9838	14.7196	8.51138	12.3747	OsLEA15	late embryogenesis abundant domain-containing protein, putative, expressed
LOC_Os03g02050	0.14552	0	44.9802	131.792	57.5618	16.1849	6.62436	11.2912	nsLTP2, OsLTP2.3, Ltp2, OsLTP2, RLTP2, OsLtpII.3	LTPL151 - Protease inhibitor/seed storage/LTP family protein precursor, expressed
LOC_Os02g30300	0.146317	0	2.83068	2.73406	2.48486	0.280482	0.404764	0.492549		MYND finger family protein, expressed
LOC_Os02g10780	0.147784	0	7.69433	6.80752	7.89849	1.1796	1.23573	0.895082	OsSPX2, SPX2	SPX family protein
LOC_Os10g03220	0.149479	9.35358e-07	1.30715	2.00686	2.02524	0.306533	0.132708	0.358864		transposon protein, putative, unclassified, expressed
LOC_Os04g34530	0.149836	0	8.26574	9.58183	8.93016	1.3216	1.2079	1.48276		integral membrane protein DUF6 containing protein, expressed
LOC_Os02g20540	0.149915	0	5.07737	4.59137	4.3742	0.644049	0.750692	0.710501	OsFLA19	fasciclin domain containing protein, expressed
LOC_Os06g05860	0.150887	0	55.964	51.5555	54.1997	7.94795	8.08474	8.36866	OsPFK06, PFK06, PFK6	6-phosphofructokinase, putative, expressed
LOC_Os05g39830	0.150973	0	7.45383	5.49516	5.61645	1.20489	0.846707	0.751289		expressed protein
LOC_Os12g05180	0.152497	0	4.9697	3.42032	4.58609	0.430573	0.72492	0.82333		avr9/Cf-9 rapidly elicited protein, putative, expressed
LOC_Os02g55970	0.152705	0	7.63379	10.6833	9.13427	1.67259	0.954994	1.56438		ANTH, putative, expressed
LOC_Os02g21750	0.152992	6.91764e-06	0.55031	1.04307	0.710519	0.102421	0.124155	0.125901	OsABCB10, OsPGP10	MDR-like ABC transporter, putative, expressed
LOC_Os10g35490	0.154088	0	11.9051	9.3456	7.97609	1.27061	1.49745	1.73544		hydrolase, alpha/beta fold family domain containing protein, expressed
LOC_Os05g34940	0.154303	2.01249e-08	1.73426	1.38061	1.04687	0.331994	0.11179	0.198384	OsMADS4, PI1	MADS-box gene
LOC_Os02g54140	0.154357	0	9.47786	17.9694	10.2138	2.30145	1.74364	1.76817	OsHSP18.0-CIII	hsp20/alpha crystallin family protein, putative, expressed
LOC_Os03g19120	0.154431	1.11045e-05	1.67264	1.92599	1.54606	0.367726	0.265333	0.161439		MYB family transcription factor, putative, expressed
LOC_Os03g42760	0.154582	0	5.21617	6.06825	5.17901	1.11722	0.723452	0.704282		zinc finger protein-related, putative, expressed
LOC_Os02g22290	0.154966	0.00541207	1.09366	1.23722	2.18902	0.40495	0.0584384	0.237041		retrotransposon protein, putative, Ty3-gypsy subclass, expressed
LOC_Os03g59290	0.15502	0	3.43892	3.23053	3.23468	0.37876	0.526092	0.63049		C-methyltransferase, putative, expressed
LOC_Os02g29960	0.15564	0	3.52792	4.57592	4.20872	0.703013	0.55578	0.65753		cytochrome P450, putative, expressed
LOC_Os02g50060	0.156261	0	5.30082	7.21596	6.77558	1.17203	0.914874	0.927741	OsCML20	calmodulin
LOC_Os01g55560	0.156393	0	69.2549	76.4697	68.1151	11.0493	11.4468	10.9469		ABIL3, putative, expressed
LOC_Os04g55800	0.15657	0	72.9314	64.75	69.2894	11.4044	9.46237	11.5385	OsSultr3;3, OsSul3;3, SULTR3;3	sulfate transporter, putative, expressed
LOC_Os05g20460	0.157203	0	2.54397	1.85619	3.59204	0.30377	0.485862	0.466764		retrotransposon protein, putative, unclassified, expressed
LOC_Os11g19060	0.157648	0	21.5434	18.2022	20.2495	2.90841	3.23932	3.31035	OsPLT6, AP2/EREBP#118, AP2/EREBP118	BABY BOOM 1, putative, expressed
LOC_Os05g25030	0.158828	0	28.973	40.103	36.6325	4.52618	7.16314	5.10018		expressed protein
LOC_Os02g50040	0.159231	0	32.5458	22.7935	25.004	3.6904	4.45206	4.65067	OsGH9B1, GH9B1	glycoside hydrolase gene
LOC_Os06g25930	0.159263	5.30977e-05	0.921784	1.04456	0.97375	0.198517	0.100268	0.169464		retrotransposon protein, putative, unclassified, expressed
LOC_Os05g36290	0.159491	0	88.8819	117.132	95.0049	15.4172	15.9207	16.672		actin, putative, expressed
LOC_Os02g52640	0.160098	0	1.82853	2.39313	2.43826	0.271137	0.517357	0.277747	OsSTA79	xyloglucan fucosyltransferase, putative, expressed
LOC_Os05g45870	0.160253	3.75494e-07	1.16659	1.05519	1.0604	0.0817984	0.192804	0.251378	OsFbox269, Os_F0444	OsFBL25 - F-box domain and LRR containing protein, expressed
LOC_Os08g32970	0.160464	8.87161e-11	2.4303	2.30658	2.52063	0.4885	0.448608	0.227459	OsANN7	annexin, putative, expressed
LOC_Os06g07240	0.160947	3.167e-07	2.30639	2.50518	1.44196	0.236527	0.382292	0.387669		X8 domain containing protein, expressed
LOC_Os03g01270	0.161002	0	51.888	59.0008	57.9166	9.93493	9.06866	8.17441	OsEXPB7, osaEXPb1.12	expansin precursor, putative, expressed
LOC_Os01g43140	0.161208	0	17.9938	17.1711	18.6481	3.4749	2.76864	2.43157		lipase, putative, expressed
LOC_Os04g58590	0.161399	0	1.5642	1.76953	1.54802	0.148931	0.367757	0.271221		RNA recognition motif containing protein, putative, expressed
LOC_Os01g47080	0.161499	0	210.416	178.63	195.483	29.9512	30.0268	34.423		pyruvate kinase, putative, expressed
LOC_Os01g19850	0.161513	8.82043e-09	1.0595	1.18082	1.01974	0.165638	0.191226	0.169676	Os CCC2, OsCCC2, OsLAT8	amino acid permease family protein, putative, expressed
LOC_Os11g40480	0.161843	0.00283597	1.58749	0.791587	0.945988	0.0818181	0.330601	0.125719		expressed protein
LOC_Os04g50700	0.163088	0	11.6822	15.3362	14.3082	1.1911	2.06265	3.48611		pathogenesis-related Bet v I family protein, putative, expressed
LOC_Os01g62610	0.163286	0	6.06642	10.4644	8.55949	1.3217	1.42128	1.35392	OsFKBP20-1b	peptidyl-prolyl cis-trans isomerase, FKBP-type, putative, expressed
LOC_Os10g03230	0.163519	0.0394507	1.91124	1.33378	2.11076	0.611174	0.264596	0		expressed protein
LOC_Os07g22460	0.163744	0	15.1268	16.3646	17.9012	2.30927	2.62436	3.1541		expressed protein
LOC_Os11g47453	0.164432	0	965.83	1130.08	1083.69	168.585	160.449	193.794		expressed protein
LOC_Os08g30540	0.164552	0	107.767	143.544	139.106	22.255	18.6845	23.3042		expressed protein
LOC_Os01g73640	0.16478	2.76044e-08	1.67805	1.71753	2.02589	0.240925	0.405626	0.246799		expressed protein
LOC_Os01g43851	0.165	0.00433371	0.639712	1.08036	0.641987	0.128585	0.162366	0.0987896		cytochrome P450 72A1, putative, expressed
LOC_Os08g23170	0.165161	0	13.01	28.9771	16.3365	4.93406	1.32913	3.36957	OsEnS-120	expressed protein
LOC_Os03g37570	0.165243	0	53.898	48.6792	49.3975	9.15299	7.51582	8.444		expressed protein
LOC_Os04g24804	0.166667	0	89.6435	138.055	121.197	22.5831	16.7777	18.7884		expressed protein
LOC_Os01g52830	0.167986	0	40.7544	65.0552	46.6225	10.9328	6.0742	8.59949		DUF1264 domain containing protein, putative, expressed
LOC_Os08g28670	0.168082	0	18.1621	19.574	19.1453	2.6297	2.92991	4.0011		pathogenesis-related Bet v I family protein, putative, expressed
LOC_Os06g49830	0.168472	0	9.0697	5.97532	7.54366	1.62398	1.32298	0.858616		SHI, putative, expressed
LOC_Os07g41720	0.168497	0	63.3495	64.7295	65.59	11.5036	10.0492	11.0799	OsHAP2G, NF-YA, CBF-B, NF-YA6, OsNF-YA6, NFYA6	HAP2 subunit of the CCAAT-box-binding transcription factor
LOC_Os01g72340	0.168733	0	25.8402	21.8561	22.2875	3.86694	3.8342	4.10739		beta-galactosidase, putative, expressed
LOC_Os06g51260	0.168989	0	6.64347	6.95316	5.35584	0.803226	1.24245	1.15707		MYB family transcription factor, putative, expressed
LOC_Os03g02710	0.169461	0	124.458	156.075	144.919	22.3989	21.6952	28.0032		hydroxymethylglutaryl-CoA synthase, putative, expressed
LOC_Os06g30370	0.169875	0	45.0494	63.409	54.3566	7.94547	10.2404	9.47232	OsMFT1	osMFT1 MFT-Like1 homologous to Mother of FT and TFL1 gene%3B contains Pfam profile PF01161%3A Phosphatidylethanolamine-binding protein, expressed
LOC_Os05g50940	0.171066	0	40.8612	47.5985	43.7393	6.69634	7.86885	8.04952		expressed protein
LOC_Os02g41610	0.17158	0	12.6654	12.8692	11.8042	1.96115	1.94372	2.50172		expressed protein
LOC_Os02g17330	0.171769	0	28.0048	23.4433	24.4298	4.58476	4.53491	3.91378		aminotransferase domain containing protein, putative, expressed
LOC_Os06g48170	0.171994	0	64.3636	72.6642	61.7149	13.5157	9.46195	11.2049	OsXTH18	glycosyl hydrolases family 16, putative, expressed
LOC_Os01g12560	0.172463	0	72.0867	55.1486	61.6292	10.7727	10.3008	11.4986		3-methyl-2-oxobutanoate hydroxymethyltransferase, putative, expressed
LOC_Os07g39530	0.17301	0	6.49942	6.32179	6.99376	1.05486	1.16805	1.20526		BTBN16 - Bric-a-Brac, Tramtrack, Broad Complex BTB domain with non-phototropic hypocotyl 3 NPH3 domain, expressed
LOC_Os06g50960	0.173772	0	33.0868	30.6152	31.6391	5.59468	6.08939	4.88353		expansin precursor, putative, expressed
LOC_Os01g63010	0.17387	0	2.88606	6.07769	3.99492	1.16688	0.471501	0.614742		universal stress protein domain containing protein, putative, expressed
LOC_Os03g20910	0.17396	0	30.3792	28.7443	30.7446	4.66564	6.24096	4.72686	OsWOX6, Os WOX6, OsWOX12B	homeobox domain containing protein, expressed
LOC_Os09g29404	0.174177	0	100.938	86.2582	92.7293	15.8158	15.9516	16.9892	OsISA3	glycogen operon protein glgX, putative, expressed
LOC_Os02g32860	0.17458	0	195.064	252.79	213.315	48.6471	26.5002	40.2796	OsEnS-38, OsPARP3, PARP3	poly synthetase 3, putative, expressed
LOC_Os12g06290	0.174971	0	10.852	13.4875	11.6685	2.19103	2.16413	1.94519		expressed protein
LOC_Os06g41640	0.176139	4.09459e-11	0.882719	0.816053	0.767041	0.171706	0.0867264	0.175892		CC-NBS-LRR protein, putative, expressed
LOC_Os08g32680	0.176194	0	5.74653	5.08298	7.38201	1.14081	0.972352	1.09559		retrotransposon protein, putative, Ty3-gypsy subclass, expressed
LOC_Os08g40590	0.176688	0	5.64848	4.91973	5.36448	0.927943	0.992522	0.89465		oxysterol-binding protein, putative, expressed
LOC_Os12g02370	0.176851	0	21.5503	38.6679	34.1013	5.48092	5.31342	5.88621	CHI	chalcone--flavonone isomerase, putative, expressed
LOC_Os01g62500	0.177459	0	9.84526	9.28188	10.3798	1.50274	1.77432	1.95921	OsFtsH3, FtsH3	OsFtsH3 FtsH protease, homologue of AtFtsH3/10, expressed
LOC_Os03g52080	0.177615	0	28.2643	26.8698	29.5611	4.89113	4.37078	5.7812	OsSCP21	OsSCP21 - Putative Serine Carboxypeptidase homologue, expressed
LOC_Os12g38440	0.177624	0	68.853	75.2374	78.5717	11.6453	13.8037	14.1013		XH domain containing protein, expressed
LOC_Os03g59460	0.177975	5.89372e-07	2.04708	5.41271	3.24372	0.571487	0.92368	0.409794	OsbZIP34	bZIP transcription factor
LOC_Os08g45110	0.178188	0.000110135	1.62343	5.47358	2.1689	0.719812	0.193902	0.737361	OsERF#044, OsERF044, OsERF44, AP2/EREBP#112, AP2/EREBP112, OsDREB2C, DREB2C, OsEnS-124	AP2 domain containing protein, expressed
LOC_Os01g26120	0.178497	3.41216e-12	2.82482	3.61411	3.62351	0.557661	0.563333	0.675121		membrane associated DUF588 domain containing protein, putative, expressed
LOC_Os12g38040	0.179066	3.1388e-05	0.854855	0.720562	0.849926	0.176883	0.102104	0.15531		metallothionein family protein, expressed
LOC_Os04g46740	0.17946	0	157.217	144.86	151.453	27.1502	25.874	28.3661	OsPME15	pectinesterase, putative, expressed
LOC_Os08g02180	0.179559	4.87939e-09	2.10498	4.08803	3.59204	0.488202	0.657558	0.611239		expressed protein
LOC_Os01g69080	0.179828	0	286.064	277.083	285.46	50.3197	49.1711	53.1121	OsSSI2	fatty-acid desaturase gene
LOC_Os11g03780	0.180064	0	38.6127	42.235	38.7777	6.19253	7.63932	7.70832	OsWD40-181	alpha-N-arabinofuranosidase, putative, expressed
LOC_Os02g36490	0.180543	0	15.5663	19.9547	16.7335	3.61262	3.06175	2.75984		expressed protein
LOC_Os02g06170	0.183368	0	48.3137	55.4311	53.5967	10.5038	9.93541	8.41226		expressed protein
LOC_Os01g04370	0.184329	0	47.4966	63.7129	56.6731	12.2329	10.8127	7.90007	Oshsp16.9A, OsHsp16.9A, HSP16.9A, OsHSP16.9A-CI	hsp20/alpha crystallin family protein, putative, expressed
LOC_Os05g50110	0.184402	0	118.907	179.235	145.265	30.4781	24.5067	26.7802		oleosin, putative, expressed
LOC_Os04g51000	0.185262	0.000232858	1.01806	1.04201	1.67292	0.22737	0.114841	0.34937	RFL, OSL, FL, APO2, APO2/RFL, SSC, SSC/RFL/APO2	rice LFY homolog; ABERRANT PANICLE ORGANIZATION 2
LOC_Os06g19200	0.185717	0	16.0255	13.3183	15.6267	3.02847	2.50304	2.82027		expressed protein
LOC_Os02g36700	0.185911	0	3.0571	2.73437	2.64756	0.470554	0.531263	0.56709	OsSUT5(t), OsSUT5Z, OsSUT5	sucrose transporter
LOC_Os02g53030	0.186436	1.78865e-05	1.60351	2.40324	2.84335	0.518001	0.52327	0.235835	OsRLCK84	mitogen-activated protein kinase kinase kinase 1, putative, expressed
LOC_Os07g25740	0.186538	0	3.29951	3.94866	3.53914	0.765247	0.515354	0.731643		expressed protein
LOC_Os03g42520	0.18685	3.74486e-05	0.844129	1.2513	1.22995	0.29254	0.0591031	0.269705	OsEnS-49	expressed protein
LOC_Os01g20030	0.187105	0	22.8077	12.0235	12.6511	4.59978	2.47817	1.80623	OsDOG1L-1	expressed protein
LOC_Os02g34710	0.187113	3.78545e-08	2.03725	2.00008	1.84466	0.334282	0.295472	0.470843		expressed protein
LOC_Os08g18880	0.187687	0	10.0598	6.63816	7.52108	1.27465	1.63879	1.63216	OsWD40-158	WD domain, G-beta repeat domain containing protein, expressed
LOC_Os06g11980	0.188433	6.82432e-12	5.46486	4.17823	4.17321	0.992583	1.13637	0.474498		DUF581 domain containing protein, expressed
LOC_Os12g38350	0.188717	4.53113e-06	2.82329	3.59025	3.25358	0.687869	0.608008	0.528479	OsRALF-41, OsRALF41, RALF-41	RALFL43 - Rapid ALkalinization Factor RALF family protein precursor, expressed
LOC_Os07g09050	0.188898	0	8.29808	11.026	10.5461	1.82231	1.64593	2.17419		exostosin family protein, putative, expressed
LOC_Os02g34900	0.189017	0.00516301	0.48878	0.50028	0.493885	0.10679	0.107876	0.065636		transposon protein, putative, CACTA, En/Spm sub-class, expressed
LOC_Os09g37710	0.189274	0	11.0321	9.52633	11.0795	1.92078	1.97187	2.09559		NIN, putative, expressed
LOC_Os03g25400	0.189473	0	85.912	86.9582	81.4382	15.9773	15.5042	16.7031	Ospdhk1	kinase, putative, expressed
LOC_Os09g36860	0.189558	0	1959.54	1727.03	1743.54	362.195	312.809	354.319		acyl carrier protein, putative, expressed
LOC_Os03g31180	0.189664	0	17.8853	23.8816	19.9369	3.5671	4.40239	3.73349		diacylglycerol kinase 1, putative, expressed
LOC_Os05g18446	0.190377	0	7.15967	15.231	13.2728	2.11636	1.71031	2.96287		retrotransposon protein, putative, Ty3-gypsy subclass, expressed
LOC_Os06g29679	0.190876	0.000291121	2.30229	2.35646	2.03981	0.522481	0.603195	0.15292		expressed protein
LOC_Os06g36800	0.191368	0	43.6365	51.7681	47.0455	8.69998	9.42412	9.13628		O-acyltransferase, putative, expressed
LOC_Os01g10140	0.192773	0	100.278	76.2759	88.0588	14.5239	17.202	19.2843	OsRDR4, OsRDR3b	RNA-dependent RNA polymerase, putative, expressed
LOC_Os01g57420	0.192933	0	51.2134	55.9806	51.5821	9.12931	11.0949	10.4089		diacylglycerol kinase, putative, expressed
LOC_Os05g51620	0.192993	0	8.84856	8.12957	9.76345	1.80762	1.82601	1.52731		expressed protein
LOC_Os08g20410	0.193043	0	6.37657	6.23437	5.73067	0.765204	1.20779	1.56772		expressed protein
LOC_Os04g35940	0.193784	0	2.47449	3.09554	2.72291	0.621728	0.383809	0.601503	OsFbox211, Os_F0331	OsFBX135 - F-box domain containing protein, expressed
LOC_Os06g10580	0.194068	0	3.82099	3.03759	3.3506	0.596531	0.659092	0.72565	OsCNGC11, OsCNGC13, CNGC13, SSS1-D	cyclic nucleotide-gated ion channel, putative, expressed
LOC_Os01g52540	0.194127	0	5.01618	4.5718	5.636	0.908514	1.07971	0.967159		B3 DNA binding domain containing protein, expressed
LOC_Os08g34240	0.194852	0	53.0417	46.0584	57.2092	10.0804	10.7639	9.61291	OsCIPK06, CIPK6, OsCIPK6	CAMK_KIN1/SNF1/Nim1_like.33 - CAMK includes calcium/calmodulin depedent protein kinases, expressed
LOC_Os09g39440	0.194913	0	18.0672	16.7633	15.866	3.43228	3.80272	2.64642		inosine-uridine preferring nucleoside hydrolase family protein, putative, expressed
LOC_Os08g32060	0.195171	0.0254079	0.531955	0.497125	0.415349	0.116223	0.0704429	0.0952449	OsPUB5	spotted leaf 11, putative, expressed
LOC_Os02g48094	0.195669	0	12.0479	16.0417	14.8108	2.83958	3.08495	2.46974		expressed protein
LOC_Os05g02240	0.195703	0	5.85793	4.41687	5.03304	1.13822	0.852434	1.00514		ATCHX20, putative, expressed
LOC_Os02g57400	0.196924	0	148.636	138.164	135.678	29.7267	24.8059	28.6632	Lpa1, OsLpa1, OsLpa1.1, OsLpa1.2, OsLpa1.3, Oslpa1	2-phosphoglycerate kinase-related, putative, expressed
LOC_Os11g02570	0.197272	4.28567e-09	2.5301	4.29643	3.82687	0.809072	0.700544	0.591997		esterase, putative, expressed
LOC_Os01g69030	0.197889	0	12.584	8.59169	9.43406	2.22929	1.61906	2.20901	sps1, OsSPS1, SPS	sucrose-phosphate synthase, putative, expressed
LOC_Os01g72560	0.198393	6.05289e-05	1.43609	1.66586	1.56762	0.240549	0.291595	0.394262		expressed protein
LOC_Os12g03530	0.198926	0	3.3809	3.9548	3.62819	0.701148	0.844487	0.635367		alpha-N-arabinofuranosidase, putative, expressed
LOC_Os05g18419	0.199279	0.00113752	4.25596	9.5042	6.94818	1.94423	0.589203	1.59331		retrotransposon, putative, centromere-specific
LOC_Os03g60509	0.199282	0	157.902	230.874	195.806	47.157	31.0258	38.3141	gh1, GH1, OsCHI, Cfi, CHI	golden hull and internode 1;chalcone isomerase gene
LOC_Os01g10130	0.199386	0	7.90563	7.38362	7.89895	1.25801	1.83932	1.52606	OsRDR3, OsRDR3a	RNA-dependent RNA polymerase, putative, expressed
LOC_Os01g58048	0.199484	2.38851e-11	4.04694	5.31679	3.5732	0.849873	0.735872	0.994962		expressed protein
LOC_Os06g01250	0.199663	0	79.17	112.913	107.367	21.4506	17.5476	20.7908	CYP93G2, OsF2H	Flavanone 2-Hydroxylase;Cytochrome P450 93G2
LOC_Os07g39700	0.200299	0	31.693	42.2094	40.337	9.21025	6.20262	7.46921	Sdr4, OsSdr4, OsSdr4-n, OsSdr4-k, OsSdr4L, Sdr4L	Seed dormancy 4
LOC_Os05g43460	0.201226	4.69854e-09	3.38991	3.46967	2.40691	0.502661	0.78987	0.572128		DUF567 domain containing protein, putative, expressed
LOC_Os07g47960	0.201246	0	12.7083	10.0511	9.09776	1.8472	2.23919	2.32475	OsbHLH163	basic helix-loop-helix domain containing protein, expressed
LOC_Os01g36550	0.202587	0.000188417	0.987626	1.70801	1.22318	0.273816	0.414902	0.105184	OsLysM-RLK3, OsLYK1	protein kinase family protein, putative, expressed
LOC_Os03g30780	0.203508	0.0060829	0.914122	1.13055	0.804713	0.229678	0.193345	0.156851		expressed protein
LOC_Os10g13850	0.203572	0	12.3707	16.9567	12.6075	1.75263	4.3155	2.46862		POEI17 - Pollen Ole e I allergen and extensin family protein precursor, expressed
LOC_Os07g36460	0.203626	0.00164419	1.68944	1.42041	1.72095	0.242561	0.306285	0.434829	Udt1, bHLH164, OsUDT1, OsbHLH164	Undeveloped Tapetum1
LOC_Os09g28910	0.203882	0	19.7058	19.9486	20.114	3.7947	4.85552	3.53552	OsbetaCA2, betaCA2	carbonic anhydrase, chloroplast precursor, putative, expressed
LOC_Os03g15180	0.204714	0	4.83824	4.5964	4.77215	0.752214	1.27549	0.880631		PH domain containing protein, expressed
LOC_Os03g12110	0.20544	0	12.3342	10.6103	12.5099	2.57811	2.39028	2.31537		homocysteine S-methyltransferase protein, putative, expressed
LOC_Os10g35480	0.206607	0	50.2543	54.7077	50.8615	9.70601	10.3039	12.1843		lanC-like protein 2, putative, expressed
LOC_Os12g42730	0.206916	0	182.805	235.286	206.777	42.5208	40.2021	46.5722		mov34/MPN/PAD-1 family protein, expressed
LOC_Os08g10730	0.207658	0.00609011	0.960543	1.08848	1.12341	0.482682	0.034828	0.141271		expressed protein
LOC_Os12g42230	0.208027	0	155.084	123.557	137.229	30.0056	27.8186	28.688		transketolase, putative, expressed
LOC_Os11g19730	0.208367	0	40.6573	44.8594	43.3852	8.22902	9.23881	9.39111		expressed protein
LOC_Os11g43760	0.208571	0.00116777	1.40517	0.65919	0.927742	0.294213	0.118882	0.21097		lipase class 3 family protein, putative, expressed
LOC_Os03g60380	0.209231	0	192.818	174.974	177.809	39.5442	35.7165	38.8957		cinnamoyl CoA reductase, putative, expressed
LOC_Os05g02870	0.209279	0.00132108	1.81862	0.676877	0.844141	0.276932	0.251774	0.17021	OsABCG10	white-brown complex homolog protein, putative, expressed
LOC_Os06g07220	0.210019	0	3261.18	3959.49	3947.34	801.153	780.54	763.802		LTPL128 - Protease inhibitor/seed storage/LTP family protein precursor, expressed
LOC_Os01g65240	0.211229	0	8.20424	6.77092	7.63907	1.56435	1.84364	1.36879		transposon protein, putative, Pong sub-class, expressed
LOC_Os02g08320	0.21213	0	17.8533	17.798	17.6606	4.66723	3.66699	2.97485		haemolysin-III, putative, expressed
LOC_Os04g10590	0.212136	3.64649e-05	1.01249	1.45084	1.4261	0.203515	0.274114	0.347461		retrotransposon protein, putative, unclassified, expressed
LOC_Os03g45344	0.212504	0	31.1621	29.4729	31.9069	5.55012	6.97961	7.13579		expressed protein
LOC_Os12g06480	0.212939	0	17.0558	13.724	15.7279	2.58538	3.3272	3.99075		PHD-finger family protein, expressed
LOC_Os06g18670	0.212965	0	84.3009	127.244	119.632	25.9089	20.7596	23.8607	UGT	anthocyanidin 3-O-glucosyltransferase, putative, expressed
LOC_Os07g40250	0.214665	0	8.61459	12.1377	10.2234	2.49323	1.82667	2.32949		sex determination protein tasselseed-2, putative, expressed
LOC_Os09g32988	0.214843	0	33.5773	33.5734	37.7335	7.01647	8.02538	7.49176		POEI18 - Pollen Ole e I allergen and extensin family protein precursor, expressed
LOC_Os06g41020	0.216209	0	41.972	31.9166	37.2297	7.89626	7.614	8.51448		DUF1680 domain containing protein, putative, expressed
LOC_Os06g23590	0.216583	2.27965e-05	4.72229	5.08779	4.20085	0.749367	1.26165	1.02352		expressed protein
LOC_Os04g20749	0.217123	0	33.9839	49.9591	43.7062	9.36647	8.07593	10.2732		expressed protein
LOC_Os11g31980	0.217434	0	65.4711	57.6192	65.0987	13.171	14.086	13.6618	OsSCP63	OsSCP63 - Putative Serine Carboxypeptidase homologue, expressed
LOC_Os08g07720	0.217758	0	6.68089	5.15658	5.20637	1.24749	1.18605	1.2779		transferase family protein, putative, expressed
LOC_Os05g20450	0.217834	3.41216e-12	1.18682	1.07977	1.61591	0.291567	0.174042	0.380132		retrotransposon protein, putative, unclassified, expressed
LOC_Os04g38400	0.21892	2.24861e-09	2.52443	2.58382	2.13339	0.465134	0.42715	0.693053		ethylene-insensitive 3
LOC_Os10g41480	0.219279	0	8.13648	12.6698	9.51345	2.44621	1.55325	2.64903		phospho-2-dehydro-3-deoxyheptonate aldolase, chloroplast precursor, putative, expressed
LOC_Os01g66100	0.21967	0	4.50357	4.38649	4.68073	1.31405	1.10618	0.56087	sd1, sd1 (d47, sd1-d, sd1-1), d49(sd1-r), d47, C20OX2, OsGA20ox-2, OsGA20ox2, GA20ox-2, GA20OX2, GA20ox2, sd-1, SD1-ja, SD1-in, sd1-2, Sd-1, GA20, 20ox2, Os20ox2	dee-geo-woo-gen dwarf
LOC_Os04g09900	0.219845	0.029605	0.920302	0.639818	0.990526	0.453735	0.0176288	0.0893839	OsCPS4, CYC1, OsCYC1, OsCyc1, cpsl3, OsCPSL3, OsCPSsyn, OsCyc1/OsCPS4, OsTPS15	syn-copalyl diphosphate synthase
LOC_Os04g56580	0.220388	0	114.211	126.255	119.404	24.6877	27.6034	27.0201	OsIPK1, IPK1	Inositol 1,3,4,5,6-Pentakisphosphate 2-Kinase Gene
LOC_Os11g42410	0.221144	0	5.23805	4.83106	4.74287	1.157	1.05189	1.06668		expressed protein
LOC_Os03g04190	0.221776	0	3.60024	2.75441	3.64954	0.730972	0.701487	0.786232		cytochrome P450, putative, expressed
LOC_Os07g46840	0.221798	9.95634e-08	2.32143	3.66308	2.86102	0.680482	0.932905	0.348536	OsSDR110C-MI2, SDR110C-MI2	oxidoreductase, short chain dehydrogenase/reductase family domain containing protein, expressed
LOC_Os09g34300	0.222864	0	131.729	129.133	120.48	25.9301	28.7048	30.3527	OsITPK6, OsITP5/6K-6, ITP5/6K-6	inositol 1,3,4-trisphosphate 5/6-kinase gene
LOC_Os03g44300	0.223296	0	97.5762	83.5863	92.1942	20.8181	19.7829	20.4386		transketolase, putative, expressed
LOC_Os02g51550	0.223427	0	8.53336	9.90737	7.66899	1.66404	1.87492	2.29466		DUF581 domain containing protein, expressed
LOC_Os01g56150	0.223854	0	44.2047	49.1432	48.5256	9.94669	9.98927	11.823	OsProCP1, PROCP1	OsProCP1 - Putative Lysosomal Pro-x Carboxypeptidase homologue, expressed
LOC_Os04g23319	0.223898	3.16307e-09	3.59457	3.74151	4.56953	1.04092	0.432975	1.19175		expressed protein
LOC_Os10g41550	0.224535	8.5304e-11	1.98221	3.67897	2.23355	0.610928	0.59031	0.571403		beta-amylase, putative, expressed
LOC_Os01g54630	0.224804	9.91987e-05	2.38718	1.20344	1.24206	0.429701	0.253208	0.403495		leucine rich repeat family protein, putative, expressed
LOC_Os09g25650	0.225436	1.02365e-11	1.01065	1.32777	1.46599	0.333521	0.275656	0.248474	OsSTA227	GEX2, putative, expressed
LOC_Os02g42870	0.22586	0	4.71743	4.54677	4.90032	0.869203	1.23724	1.09276	myb7	MYB family transcription factor, putative, expressed
LOC_Os06g04450	0.226016	0	12.0384	8.50991	10.224	2.02372	2.81367	2.11764		Sec1 family transport protein, putative, expressed
LOC_Os05g20020	0.226786	1.13761e-08	4.10138	2.06508	2.44582	0.664832	0.402957	0.885353		polygalacturonase, putative, expressed
LOC_Os12g02750	0.227254	0	5.91108	7.81954	7.33413	1.65332	1.69845	1.43528		expressed protein
LOC_Os07g07450	0.22773	0	15.3787	13.069	11.8489	3.33224	2.72156	3.12297		versicolorin reductase, putative, expressed
LOC_Os03g51610	0.227907	0	13.3363	11.774	11.2838	2.43502	2.86619	2.99326	OsITPK3, OsITP5/6K-3, ITP5/6K-3, OsIPK1	inositol 1,3,4-trisphosphate 5/6-kinase gene
LOC_Os09g15590	0.229998	0	5.12538	5.1595	5.41432	1.07551	1.14363	1.39165	OsFbox475, Os_F0634	OsFBX316 - F-box domain containing protein, expressed
LOC_Os06g36680	0.230253	2.79661e-08	1.1284	1.4886	1.4834	0.277216	0.305493	0.361422		homeobox domain containing protein, expressed
LOC_Os02g43540	0.23028	0	27.5436	31.0167	31.2831	8.14851	4.90381	7.63677		retrotransposon protein, putative, unclassified, expressed
LOC_Os07g28260	0.230442	0	33.0446	29.8199	33.5509	6.99269	7.62814	7.5973		expressed protein
LOC_Os03g19920	0.230885	5.86891e-10	1.44841	1.77898	1.45356	0.339658	0.318604	0.422496		expressed protein
LOC_Os10g29470	0.231064	0	10.7622	12.2312	11.3689	2.64075	2.63107	2.66808	OsCAD3	dehydrogenase, putative, expressed
LOC_Os06g23600	0.231408	0.00817702	2.22216	1.44048	2.50393	0.59555	0.526407	0.305034		expressed protein
LOC_Os12g29520	0.232801	0	78.1433	69.5832	72.8878	15.7193	17.3395	18.3004	OsARF24	auxin response factor 24
LOC_Os12g43340	0.232833	0.00713217	1.55436	2.21346	2.14171	0.20376	0.754718	0.417454	OsADF11	actin-depolymerizing factor, putative, expressed
LOC_Os04g33900	0.23286	0	66.61	56.8007	58.2857	16.3945	12.9081	13.0073	COPT4, OsCOPT4	copper transporter gene
LOC_Os04g33330	0.233063	2.0473e-11	2.12379	2.2897	2.24352	0.569187	0.632475	0.349838		expressed protein
LOC_Os08g24930	0.233115	0	23.881	30.1942	26.7387	5.80413	6.28574	6.7491		expressed protein
LOC_Os10g28320	0.233194	0	7.41314	6.201	7.55279	1.51276	1.75737	1.66586		oxidoreductase, aldo/keto reductase family protein, putative, expressed
LOC_Os03g48030	0.233673	0.0172821	1.20233	0.835061	1.31547	0.302091	0.348758	0.132624		integral membrane HPP family protein, putative, expressed
LOC_Os11g43390	0.23542	0.00807202	0.482526	0.802553	0.530967	0.222268	0.12247	0.0827951		expressed protein
LOC_Os02g48820	0.235666	1.62903e-07	2.94626	2.42324	2.77889	0.846015	0.640965	0.43332	OsENODL8	plastocyanin-like domain containing protein, putative, expressed
LOC_Os04g54590	0.235907	1.38992e-05	3.33499	2.59423	2.39564	0.737381	0.677165	0.549351		expressed protein
LOC_Os07g08150	0.236677	0	61.8559	52.776	49.0072	12.5509	13.372	12.8067		early light-induced protein, chloroplast precursor, putative, expressed
LOC_Os09g26370	0.23678	0	5.3614	7.2234	6.41495	1.70446	1.55518	1.23911		DUF581 domain containing protein, expressed
LOC_Os05g45350	0.23727	0.000688828	1.07798	0.858158	0.885698	0.180566	0.304004	0.184968	OsDjC50	dnaJ domain containing protein, expressed
LOC_Os04g33640	0.237521	0	10.8026	11.7478	10.0835	3.18218	2.34	2.2291		glycosyl hydrolases family 17, putative, expressed
LOC_Os05g06460	0.238915	0	180.56	176.005	183.911	41.5947	43.2879	44.2455		dihydrolipoyl dehydrogenase, putative, expressed
LOC_Os06g14870	0.239161	0	7.93607	8.94091	8.80565	2.75427	1.50707	1.88094		expressed protein
LOC_Os03g59300	0.23977	0	159.85	147.39	169.498	38.4509	42.8645	32.9922		expressed protein
LOC_Os03g14010	0.2402	0	55.2464	43.429	45.7917	11.0626	11.3348	12.3036		glycosyl hydrolase family 10 protein, putative, expressed
LOC_Os05g08110	0.240337	0	5.62947	5.70062	6.13662	1.50471	1.39842	1.29477		early light-induced protein, chloroplast precursor, putative, expressed
LOC_Os07g35610	0.241085	0	7.08728	5.75676	5.67506	1.21671	1.69	1.55797		kelch repeat-containing protein, putative, expressed
LOC_Os12g05330	0.241104	0	6.94449	11.1911	7.53109	2.48732	1.83759	1.86343		protein of unknown function containing protein, expressed
LOC_Os05g33010	0.241212	0	17.2924	21.6692	17.0722	5.0351	4.26594	4.21502		heat shock protein DnaJ, putative, expressed
LOC_Os06g10990	0.241981	1.03081e-08	1.82966	1.93959	1.72572	0.361201	0.497557	0.470918	BiP3	Hybrid sterility
LOC_Os04g59120	0.242574	0	4.18474	2.78748	3.05235	0.867851	0.64065	0.923202	OsUMAMIT7	auxin-induced protein 5NG4, putative, expressed
LOC_Os11g05170	0.24282	4.74116e-07	3.99949	7.64651	4.14524	1.21345	1.45563	1.16535		expressed protein
LOC_Os07g49140	0.243303	0	5.57653	6.19542	7.02807	1.54302	1.50496	1.52613	OsSCAR4, SCAR4	expressed protein
LOC_Os04g43650	0.243308	0	23.2409	18.6904	17.0689	5.04227	4.83139	4.48157		L-allo-threonine aldolase, putative, expressed
LOC_Os11g07600	0.243663	0	6.77075	9.45007	6.66478	1.70118	2.31735	1.55783	OsABCG27	ABC-2 type transporter domain containing protein, expressed
LOC_Os06g32355	0.2438	0	80.2852	133.715	111.66	29.3629	24.3562	25.677		conserved hypothetical protein
LOC_Os06g15480	0.244197	0	51.6706	57.655	57.0259	13.625	13.9059	13.0916	OsbZIP47	bZIP transcription factor
LOC_Os07g47750	0.244524	0	22.9603	20.2214	20.2257	5.05975	5.57587	4.86898		POEI49 - Pollen Ole e I allergen and extensin family protein precursor, expressed
LOC_Os04g56309	0.244916	0.00265798	2.26629	4.63923	2.87286	0.81996	0.8283	0.746622		expressed protein
LOC_Os04g58310	0.245647	0	8.31415	8.89009	9.51885	2.10064	2.21632	2.24749	OsCBSX12	CBS domain-containing protein, putative, expressed
LOC_Os05g43920	0.24633	0	37.3375	28.2802	30.4906	6.99718	8.23968	8.43749	OsARF14, OsETT4, ETT4	auxin response factor
LOC_Os07g44430	0.246643	0	141.69	334.837	152.775	67.5538	34.3809	53.2778	Os1-CysPrxA, 1-CysPrxA	peroxiredoxin, putative, expressed
LOC_Os07g37350	0.246649	0	52.1819	56.6946	56.8565	14.3832	13.009	13.4857		armadillo/beta-catenin repeat family protein, putative, expressed
LOC_Os03g39230	0.246762	0	3.96071	5.87912	5.49273	1.05646	1.21966	1.50737		OTU-like cysteine protease family protein, putative, expressed
LOC_Os09g29780	0.246766	0	33.2437	42.9603	37.1056	9.08808	8.75599	10.1168		expressed protein
LOC_Os11g10750	0.246875	0	88.7307	71.8817	74.9616	18.9473	19.3184	19.8915	OsSCP48	OsSCP48 - Putative Serine Carboxypeptidase homologue, expressed
LOC_Os04g19740	0.247017	0	137.283	146.461	140.667	31.8481	32.4392	40.5493		transketolase, chloroplast precursor, putative, expressed
LOC_Os01g65670	0.247322	0	7.07597	7.78724	8.03715	1.85654	2.03436	1.77286	OsAAP10D, AAP10D, OsAAP6, AAP6, qPC1	amino acid permease
LOC_Os06g50930	0.247483	0	328.976	337.034	322.493	86.3712	81.3646	76.9016	OsStr9	rhodanese-like domain containing protein, putative, expressed
LOC_Os03g12990	0.247935	4.7429e-10	5.57573	10.0387	5.6062	1.48532	1.97784	1.79817		phytosulfokines precursor, putative, expressed
LOC_Os10g36626	0.248093	0	27.3979	33.8385	33.253	8.36941	7.27091	7.80184		expressed protein
LOC_Os03g17610	0.248467	2.35439e-10	3.35924	3.19108	3.54861	1.27983	0.98078	0.248644	OsTOP6A3, OsSPO11-3, OsSPO11C	topoisomerase 6 gene
LOC_Os01g07660	0.24875	0.000295194	1.26058	1.01861	1.50686	0.400075	0.336787	0.204914		expressed protein
LOC_Os03g26210	0.248754	0	18.6958	24.0575	20.538	6.37431	4.41902	4.95063	OsIRO3, IRO3, OsbHLH063, bHLH063, bHLH63	rice bHLH protein gene
LOC_Os05g49940	0.24937	0.0116618	1.37128	3.0287	2.66845	0.507744	0.586182	0.668729		expressed protein
LOC_Os01g52660	0.249589	0	14.6606	17.3018	14.3297	4.29966	3.60184	3.6525		POEI51 - Pollen Ole e I allergen and extensin family protein precursor, expressed
LOC_Os02g47280	0.250015	0	60.8087	58.791	59.0191	14.5306	15.3094	14.8175	OsGRF4, GRF4, GS2/OsGRF4, PT2, GLW2	growth-regulating factor; GRAIN SIZE ON CHROMOSOME 2
LOC_Os05g34550	0.25018	0	10.6378	14.4476	12.3769	3.2709	3.172	2.92942	OsMLO9, MLO9	MLO domain containing protein, putative, expressed
LOC_Os03g50490	0.250501	0	16.9475	8.50505	8.15347	2.44266	3.06771	2.90797	OsGLN1;3, GLN1;3, OsGS1;3, GS1;3	glutamine synthetase, catalytic domain containing protein, expressed
LOC_Os08g05830	0.251066	0	199.617	210.625	203.45	50.694	49.6248	53.758		transaldolase, putative, expressed
LOC_Os01g56235	0.251067	3.05484e-06	3.77455	2.3732	2.79114	1.08386	0.383208	0.777195		expressed protein
LOC_Os02g45520	0.251237	0	7.95369	4.99255	5.46039	1.66457	1.38586	1.57399	OsSPX-MFS2, SPX-MFS2	OsSPX-MFS2
LOC_Os08g36440	0.251661	0	53.4597	87.5169	64.5487	18.8252	14.0826	18.815	OsEnS-122	HVA22, putative, expressed
LOC_Os10g25140	0.252659	0	19.937	19.2174	18.914	4.31219	4.94559	5.41371	OsAlaAT4, AlaAT4	aminotransferase, classes I and II, domain containing protein, expressed
LOC_Os08g40180	0.252937	0	169.829	260.242	225.628	53.7269	58.5238	53.6	HMGR III, Hmg3, HMGR3, HMGR 3, OsHMGR3	3-hydroxy-3-methylglutaryl-coenzyme A reductase, putative, expressed
LOC_Os02g49480	0.253456	0	5.60263	5.28805	5.20968	1.71957	1.56676	0.794398	OsbHLH034	helix-loop-helix DNA-binding domain containing protein, expressed
LOC_Os02g49260	0.253725	3.14669e-08	2.50514	2.80597	2.64636	0.71256	0.527859	0.778593	OsSTA72	transporter-related, putative, expressed
LOC_Os06g50040	0.253784	0	11.6261	11.2733	11.8937	3.19784	2.67127	2.96082	OsSAUR29	OsSAUR29 - Auxin-responsive SAUR gene family member, expressed
LOC_Os04g02900	0.254034	0	264.602	231.235	249.902	64.5214	61.0147	63.9073		dehydrogenase E1 component domain containing protein, expressed
LOC_Os08g36900	0.255742	0	591.369	494.075	573.237	154.943	127.943	141.308	Amy3D/E*(RAmy3D/E), alpha Amy8, alphaAmy8, AmyII-3, AMY1.4, Amy3E, Amy3D/E*, RAmy3D/E, Amy9, RAmy3E, alphaAmy8-C, AMY3E/AMY1.4	alpha-amylase precursor, putative, expressed
LOC_Os04g15920	0.255753	0	6.69118	8.0017	7.96997	1.98998	1.76761	2.0385	OsCAD6	dehydrogenase, putative, expressed
LOC_Os06g01760	0.256246	0	86.7887	81.9682	85.6217	24.4328	21.8325	18.9183		ligA, putative, expressed
LOC_Os01g71700	0.257032	0.0154321	0.866548	0.791908	0.784628	0.217724	0.282779	0.127447	OsBAT2	amino acid permease family protein, putative, expressed
LOC_Os01g54990	0.257201	0	140.063	97.1267	115.547	27.1723	31.6316	31.9201	OsARF3, ETT3, Os ETT3, OsETT3	auxin response factor
LOC_Os02g32380	0.257653	0.0294564	3.77586	2.45936	3.2635	0.344983	1.2778	0.824585		expressed protein
LOC_Os02g43370	0.258455	0	8.72418	8.19281	8.52991	2.62863	1.96034	1.98791	OsYSL2, Os-YSL2, OsYs6	metal-nicotianamine transporter
LOC_Os09g29360	0.258671	0	25.1439	31.1743	30.0189	8.51367	6.76294	7.05627	OsbHLH046	helix-loop-helix DNA-binding protein, putative, expressed
LOC_Os02g55050	0.258814	4.15703e-08	1.59146	1.46326	1.70968	0.379531	0.520317	0.333243	OsFbox114, Os_F0103	OsFBX64 - F-box domain containing protein, expressed
LOC_Os12g18450	0.259007	0	3.91116	4.35013	3.9113	1.02201	1.19123	0.939546		expressed protein
LOC_Os05g37410	0.25928	0	43.3028	38.0245	43.8375	9.48107	11.2432	11.7285	ROS1D, ROS1d	hhH-GPD superfamily base excision DNA repair protein, expressed
LOC_Os01g66730	0.25957	0	16.9146	12.0786	14.8671	3.1627	4.08234	4.13975		exosome complex exonuclease RRP40, putative, expressed
LOC_Os09g39740	0.260229	0	3.70812	3.64233	3.00105	0.811466	0.78936	1.09294		ACT domain containing protein, expressed
LOC_Os02g17350	0.260633	0	3.2358	3.82146	3.96601	0.854704	0.737047	1.28128		VHS and GAT domain containing protein, expressed
LOC_Os06g40750	0.26094	0.000267008	2.77998	2.52205	2.06904	0.88898	0.449011	0.58542		expressed protein
LOC_Os09g33690	0.262564	0	20.182	20.7319	18.5838	5.50056	4.71311	5.40827	Os9bglu32, Os9Bglu32	Os9bglu32 - beta-glucosidase homologue, similar to G. max hydroxyisourate hydrolase, expressed
LOC_Os02g24430	0.262833	1.91791e-05	1.01707	1.32727	1.10126	0.255543	0.309771	0.340305	OsSNDP2, SNDP2	expressed protein
LOC_Os01g47635	0.26342	7.91621e-10	3.83708	3.76596	5.16391	1.21501	1.17401	0.97406		expressed protein
LOC_Os07g49510	0.26354	1.70608e-11	4.49186	4.04784	3.71354	0.932322	1.09051	1.20638		expressed protein
LOC_Os06g01780	0.263704	5.16111e-05	1.88049	1.39236	2.28236	0.361901	0.649924	0.453107	OsSTA163	ethylene-responsive element-binding protein, putative, expressed
LOC_Os06g07770	0.26399	1.70608e-11	1.04188	0.819443	0.926838	0.253512	0.211553	0.270983		expressed protein
LOC_Os01g57370	0.264007	0	4.95146	4.43446	5.14143	1.18753	1.19961	1.44819	OsCNGC1, OsCNGC15, CNGC15	cyclic nucleotide-gated ion channel 2, putative, expressed
LOC_Os06g32350	0.264584	0	339.179	493.012	440.274	107.341	104.995	124.338		THION12 - Plant thionin family protein precursor
LOC_Os01g07800	0.264892	0	4.84023	5.01722	5.32479	1.61118	1.25198	1.1585		thiol-disulphide oxidoreductase DCC, putative, expressed
LOC_Os10g35980	0.264947	0	63.1879	59.775	67.1041	15.4433	19.4397	15.4748	OsTET14	tetraspanin family protein, putative, expressed
LOC_Os05g45460	0.26504	0	138.624	117.268	121.196	30.8317	31.7809	37.3307		POEI52 - Pollen Ole e I allergen and extensin family protein precursor, expressed
LOC_Os08g16710	0.265048	0.0338594	0.905963	0.895304	0.825032	0.251175	0.380595	0.0643247	OsFbox431, Os_F0614	OsFBX281 - F-box domain containing protein, expressed
LOC_Os02g06560	0.265361	0	24.4576	30.4281	25.6137	9.95929	7.27787	4.12425		wound induced protein, putative, expressed
LOC_Os05g34790	0.266321	0	26.2557	23.2335	25.0982	5.01895	7.91227	6.93297		GYF domain containing protein, putative, expressed
LOC_Os10g02220	0.266998	4.30887e-08	2.35056	1.94413	1.47981	0.524968	0.699042	0.317771		peptide transporter PTR2, putative, expressed
LOC_Os07g48570	0.268096	0	6.82909	5.62893	5.87341	1.30586	2.2088	1.39992	OsDof23, Dof23, OsDof-23, OsDof1, OsCDF3, CDF3	Dof Transcription Factor; DNA binding with one finger
LOC_Os07g10530	0.268258	0	56.3557	49.031	54.3111	12.91	16.0771	13.853		carboxyl-terminal peptidase, putative, expressed
LOC_Os05g22940	0.269075	0	250.049	194.205	236.72	57.9315	59.3609	65.9409		acetyl-CoA carboxylase, putative, expressed
LOC_Os01g49020	0.269917	0.00339213	3.47798	3.22866	2.13607	0.487735	1.14962	0.749438	OsSUI3	expressed protein
LOC_Os01g44970	0.271393	0	33.9371	35.1853	33.3383	9.22173	8.63326	9.95213		polygalacturonase, putative, expressed
LOC_Os02g50990	0.271901	0	6.24568	5.36639	5.40621	1.70047	1.37845	1.54838		RING-H2 finger protein ATL1Q, putative, expressed
LOC_Os08g32910	0.272975	0	39.8742	35.1157	44.8425	10.6308	11.0763	11.004		expressed protein
LOC_Os10g36620	0.273696	0	58.8572	71.6347	69.7885	20.2004	18.2921	16.3235		hydroxyproline-rich glycoprotein DZ-HRGP, putative, expressed
LOC_Os04g35880	0.274266	0	9.15882	8.12043	8.8124	1.70025	2.81322	2.64258		retrotransposon protein, putative, unclassified, expressed
LOC_Os04g11524	0.274869	0	202.57	203.955	195.308	56.2517	52.4174	56.7561		retrotransposon protein, putative, unclassified, expressed
LOC_Os04g43710	0.274878	0	6.01027	12.2564	8.53009	2.21329	3.07423	2.07831		CAMK_CAMK_like.3 - CAMK includes calcium/calmodulin depedent protein kinases, expressed
LOC_Os09g20390	0.274895	0	8.83394	8.30307	9.51492	3.48168	1.34822	2.49659	OsTPP7	uncharacterized glycosyl hydrolase Rv2006/MT2062, putative, expressed
LOC_Os03g41120	0.274962	1.44478e-06	3.62182	2.33406	2.31449	0.584197	0.953302	0.736541		expressed protein
LOC_Os01g65660	0.275274	5.72298e-07	3.24949	1.19275	2.50941	0.608115	0.682556	0.622941	OsAAP10C, AAP10C, OsAAP5, AAP5	amino acid transporter, putative, expressed
LOC_Os05g08970	0.275389	0	29.0195	23.7201	24.8642	5.85125	7.5437	7.97631		SSRP1-like FACT complex subunit, putative, expressed
LOC_Os05g39690	0.275676	7.50675e-11	19.3147	53.4432	21.8708	8.94243	10.5757	6.56871		oxidoreductase, aldo/keto reductase family protein, putative, expressed
LOC_Os03g44380	0.275688	1.7272e-07	1.43319	2.15721	1.44719	0.614279	0.470745	0.303778	OSNCED1, OsNCED-1, OsNCED3, OsNced3, NCED3	9-cis-epoxycarotenoid dioxygenase
LOC_Os12g36920	0.276047	0	3.86977	3.265	3.36978	0.814628	1.03528	1.04984		calmodulin binding protein, putative, expressed
LOC_Os08g32620	0.276553	0	25.3674	24.6996	22.6371	6.01473	7.05589	7.03588		ES43 protein, putative, expressed
LOC_Os02g19410	0.276788	9.53122e-06	1.66372	1.70286	1.50643	0.375362	0.37918	0.594247		expressed protein
LOC_Os10g25100	0.277043	3.75338e-11	8.41475	6.63181	7.82243	1.94511	1.96489	2.42569		expressed protein
LOC_Os08g44020	0.277253	0	4.78447	4.46262	3.74988	1.39601	1.21435	0.993087		rhamnogalacturonate lyase, putative, expressed
LOC_Os04g51172	0.278318	0	7.44768	7.87343	7.94142	1.89762	2.20091	2.37586	OsBRXL3	BREVIS RADIX-like homologous gene in rice
LOC_Os10g30450	0.278351	0	81.3697	92.2688	98.0521	27.5406	23.0161	25.0687		heavy-metal-associated domain-containing protein, putative, expressed
LOC_Os05g45480	0.278446	0	13.1765	14.3474	14.0971	3.71922	2.7324	5.13758		POEI45 - Pollen Ole e I allergen and extensin family protein precursor, expressed
LOC_Os01g03680	0.278618	0	7.96943	9.6032	6.98573	2.04496	2.29529	2.50214		BBTI8 - Bowman-Birk type bran trypsin inhibitor precursor, expressed
LOC_Os01g70950	0.27948	0	22.1664	24.2048	22.5662	5.27685	6.44822	7.54154		spermatogenesis-associated protein 20 precursor, putative, expressed
LOC_Os04g39864	0.279734	4.89679e-08	1.59299	2.79115	2.28176	0.651249	0.685284	0.528141	Os4bglu11, Os4BGlu11	Os4bglu11 - beta-glucosidase homologue, similar to Os4Bglu12 exoglucanase/beta-glucosidase, expressed
LOC_Os01g51400	0.279861	9.91232e-09	1.84983	1.6119	1.90129	0.351723	0.634466	0.514712		Leucine Rich Repeat family protein, expressed
LOC_Os05g46030	0.280162	0	15.4028	14.3986	17.7241	4.51066	4.58104	4.22315	OsSTA158	myosin head family protein, expressed
LOC_Os05g47790	0.280202	0	13.7813	13.5147	14.4019	3.52585	3.99753	4.16044		expressed protein
LOC_Os02g51590	0.280258	0	19.1469	16.3887	16.6654	4.67524	5.33882	4.6157		phosphoglycerate mutase, putative, expressed
LOC_Os06g32370	0.280621	3.41216e-12	10.8307	16.8862	16.4968	4.8097	3.70789	3.8897		THION16 - Plant thionin family protein precursor, putative
LOC_Os12g27830	0.280625	0	109.081	185.304	134.477	38.2257	38.574	43.5495	OsEnS-150, OsDR, DR	dehydrogenase/reductase, putative, expressed
LOC_Os04g41850	0.281205	0	7.32278	6.7608	6.14844	1.63243	1.85516	2.20176		NIN, putative, expressed
LOC_Os02g06460	0.281548	0.0462324	0.720572	0.983368	0.88806	0.301745	0.335296	0.0927305		expressed protein
LOC_Os01g50760	0.28237	0	333.726	419.621	374.312	103.932	97.4849	117	OsFPPS1, FPPS1, FPPS, OsFPS	polyprenyl synthetase, putative, expressed
LOC_Os10g13830	0.282609	1.587e-06	1.56887	1.95213	1.46233	0.401915	0.499696	0.506724	OsPDR13	pleiotropic drug resistance protein 13, putative, expressed
LOC_Os09g35970	0.282731	0	219.131	190.433	198.332	57.5124	54.791	59.5677		6-phosphogluconolactonase, putative, expressed
LOC_Os01g44960	0.282856	0	23.2773	22.7689	20.8837	6.13888	5.82421	6.96838		hydrolase, alpha/beta fold family domain containing protein, expressed
LOC_Os08g34500	0.283174	4.78248e-08	2.78818	4.48451	3.36613	1.02302	1.07835	0.911266		expressed protein
LOC_Os11g13930	0.283213	0	20.107	16.1303	16.6741	5.03957	5.26637	4.67925	OsZHD4	zinc-finger transcription factor
LOC_Os10g14920	0.285569	8.21836e-06	0.688307	0.71949	1.0984	0.191338	0.237888	0.286466	OsUMAMIT15	integral membrane protein DUF6 containing protein, expressed
LOC_Os12g12854	0.285996	0	6.34837	6.88345	6.95123	2.12674	1.79522	1.85031		expressed protein
LOC_Os04g31730	0.286143	0	8.4685	8.09937	7.33271	2.51144	2.2551	2.07243		expressed protein
LOC_Os04g55970	0.286236	0	86.1948	76.4826	77.2489	21.9159	22.5314	24.2282	OsPLT1, AP2/EREBP#044, AP2/EREBP44	AP2-like ethylene-responsive transcription factor AINTEGUMENTA, putative, expressed
LOC_Os11g41860	0.287445	2.70016e-06	3.41439	2.09683	2.66007	0.557622	0.736616	1.05455	OsFbox629, Os_F0564	OsFBX429 - F-box domain containing protein, expressed
LOC_Os07g48770	0.287586	0.000914927	1.7259	2.1302	1.87682	0.612197	0.618424	0.418081		serine hydrolase domain containing protein, expressed
LOC_Os06g18010	0.287587	0	20.0259	26.6427	26.9477	7.42969	6.16629	7.57509	OsCGT, CGT	UDP-glucoronosyl and UDP-glucosyl transferase domain containing protein, expressed
LOC_Os06g48960	0.288148	0	10.3641	12.8687	10.5894	2.90286	2.64489	4.19806		AIG2-like family domain containing protein, expressed
LOC_Os12g05200	0.288218	0	6.23109	6.6526	6.63911	1.83552	1.74512	2.04618		DNA binding protein, putative, expressed
LOC_Os09g30210	0.288353	0	6.47188	6.13145	7.57126	2.23084	1.439	2.14756		expressed protein
LOC_Os05g30570	0.289412	5.11824e-10	3.92217	3.10923	2.96529	0.927496	0.975968	0.989695		heavy metal-associated domain containing protein, expressed
LOC_Os11g37260	0.289644	0	23.7265	27.0494	23.6682	6.58147	7.35863	7.62218		SEY1, putative, expressed
LOC_Os02g43120	0.28966	1.6549e-08	4.35239	3.86863	3.81129	1.43889	1.22096	0.825424		zinc finger, C3HC4 type domain containing protein, expressed
LOC_Os04g48375	0.289683	0	8.55109	11.852	9.47227	2.1485	2.53208	3.97381	OsWD40-107	WD domain, G-beta repeat domain containing protein, expressed
LOC_Os04g30420	0.289778	1.69383e-07	2.56603	2.70721	2.33536	0.952212	0.521027	0.731569		dehydrogenase, putative, expressed
LOC_Os03g24040	0.290723	0	62.1014	66.6499	64.6862	18.038	19.2551	18.9436	OsDIS1	SINA E3 ligase
LOC_Os01g68370	0.291215	0	89.4726	85.5357	89.8055	25.7445	24.9346	26.4387	Vp1* (OSVP1), OsVP1, OsVp1, Vp1, ABI3, OsLFL4, OsVp-1, OSVP1	B3 domain-containing protein
LOC_Os05g35594	0.291323	1.80844e-10	2.82249	2.66667	2.5229	0.748129	0.755738	0.830232		peptide transporter, putative, expressed
LOC_Os05g05580	0.291475	0	5.68921	4.62933	4.44735	1.51521	1.61726	1.17143		expressed protein
LOC_Os02g49230	0.291481	0	9.41623	11.5804	9.9276	2.5557	3.47967	2.97845	OsN, OsBBX7, OsCCT08, DTH2	Days to heading;CONSTANS-like protein
LOC_Os05g34800	0.291824	0	5.18833	6.15699	5.34844	1.30989	1.78125	1.7805		expressed protein
LOC_Os02g01760	0.292015	0	21.736	19.1264	18.749	5.81488	5.63589	5.95665		diphosphomevalonate decarboxylase family protein, expressed
LOC_Os05g01256	0.292082	1.18187e-07	1.92064	2.37256	2.37873	0.765457	0.706004	0.477289	OsbHLH083	helix-loop-helix DNA-binding domain containing protein, expressed
LOC_Os01g04590	0.292735	0.00634331	2.20465	1.01155	1.52586	0.534829	0.540269	0.313067		expressed protein
LOC_Os12g04000	0.293068	0	8.86733	6.36447	6.2189	1.66404	2.61483	2.00765	OsPIN1D, OsPIN1d	auxin efflux carrier
LOC_Os03g41060	0.293815	0	102.321	125.823	103.781	32.3508	30.6096	34.564		GASR2 - Gibberellin-regulated GASA/GAST/Snakin family protein precursor, putative, expressed
LOC_Os05g03130	0.293903	0	71.0365	111.444	88.1551	30.9312	20.9181	27.6913	OsRCI2-7	OsRCI2-7 - Putative low temperature and salt responsive protein, expressed
LOC_Os10g37340	0.29417	0	37.8907	43.4914	40.7701	11.3698	12.7495	11.8142	RRJ1	cystathionine gamma-synthase, putative, expressed
LOC_Os10g42400	0.294396	0	4.56901	4.01256	4.46906	1.27554	1.25988	1.30664		expressed protein
LOC_Os04g49700	0.294499	5.11824e-10	2.57946	2.90127	2.24578	0.797665	0.748223	0.729564		zinc finger, C3HC4 type domain containing protein, expressed
LOC_Os08g06620	0.294542	0	33.2999	31.7298	32.5681	9.75765	8.90579	10.0832		DNA polymerase delta subunit 4 family, putative, expressed
LOC_Os01g70870	0.294977	0	4.42465	2.93757	3.66347	1.05162	1.09267	1.10804	OsIDD9	ZOS1-23 - C2H2 zinc finger protein, expressed
LOC_Os01g12740	0.295109	2.58369e-08	2.66733	1.95417	1.95756	0.59258	0.684122	0.664838		cytochrome P450, putative, expressed
LOC_Os07g38400	0.295904	0	20.3657	19.7526	20.7622	5.63091	7.01242	5.37143		transporter family protein, putative, expressed
LOC_Os11g02440	0.29615	0	29.4012	51.5121	37.6358	10.7766	10.7106	13.6211	CHI	chalcone--flavonone isomerase, putative, expressed
LOC_Os07g18750	0.297616	0	10.4612	10.1681	13.277	3.70626	3.28552	3.09928	OsLTPd3, OsLtpIV.3	LTPL42 - Protease inhibitor/seed storage/LTP family protein precursor, expressed
LOC_Os04g03810	0.298509	1.36486e-11	3.09963	6.83499	5.68199	1.30563	1.61971	1.73635	OsSub38, SUB38	OsSub38 - Putative Subtilisin homologue, expressed
LOC_Os01g41310	0.298691	0	3.46824	3.84566	3.39237	1.03278	1.2063	0.958779	OsFbox026, OsFbox26, Os_F0242	OsFBX18 - F-box domain containing protein, expressed
LOC_Os02g30110	0.299516	0.00404106	1.50488	1.19451	1.6546	0.709916	0.467698	0.126474		cytochrome P450, putative, expressed
LOC_Os01g12640	0.299594	0	45.0699	49.2033	46.133	14.0586	14.1669	13.8393		expressed protein
LOC_Os09g08480	0.300415	0.0048247	2.2195	2.54709	2.06043	0.608357	0.819394	0.623189		expressed protein
LOC_Os03g52760	0.300575	0	21.4114	21.3073	22.5854	7.25671	5.8073	6.56476	OsMIK, LPA	kinase, pfkB family, putative, expressed
LOC_Os05g48990	0.301279	0	3.84107	4.18305	4.09007	1.45149	1.15429	1.04398	OsWOX9C, DWL2	homeobox domain containing protein, expressed
LOC_Os01g23870	0.301452	0	5.47678	6.31909	6.34656	1.86812	1.51643	2.08452		expressed protein
LOC_Os05g38690	0.301928	0.0009915	1.97792	1.97255	2.19658	0.764557	0.360422	0.730983		expressed protein
LOC_Os05g06110	0.302107	0	37.8003	27.9612	33.9298	9.37169	10.2033	10.5424	VLN1, OsVLN1, Os VLN1	villin, putative, expressed
LOC_Os06g38294	0.302176	0	7.00611	4.65483	4.54452	1.55649	1.8219	1.51851	OsNRT1.2	peptide transporter PTR2, putative, expressed
LOC_Os02g04369	0.302608	0	14.266	24.9802	17.3603	5.76315	5.75077	5.61567		expressed protein
LOC_Os05g41620	0.302677	0	53.6661	64.4946	56.2288	17.1713	17.346	18.2665		expressed protein
LOC_Os01g50470	0.303096	0	2.56777	1.88611	2.64871	0.607215	0.67473	0.870826	OsSTA28	regulator of chromosome condensation, putative, expressed
LOC_Os02g25680	0.303118	6.97589e-06	3.09406	7.43332	5.85604	1.94349	2.13777	0.884833		expressed protein
LOC_Os08g33440	0.303256	0	202.631	184.846	183.329	58.159	55.8007	59.1406		2-oxo acid dehydrogenases acyltransferase domain containing protein, expressed
LOC_Os07g31430	0.303444	0	16.2518	14.8143	15.9659	5.11089	4.65742	4.50326		phosphate-induced protein 1 conserved region domain containing protein, expressed
LOC_Os01g32830	0.304805	9.30083e-07	2.48542	1.84432	2.62553	0.749367	1.09343	0.277202		expressed protein
LOC_Os03g50860	0.304975	0	21.6212	17.556	19.3969	5.27679	6.51334	6.07352	OHK4, HK, OsHK4, Crl1b, Ohk4	histidine kinase
LOC_Os10g34230	0.305967	0	5.30778	3.43657	4.88489	1.51546	1.10223	1.55241	OsCKX3, ckx3	cytokinin dehydrogenase precursor, putative, expressed
LOC_Os04g41759	0.306331	0	5.6975	7.78991	6.37802	2.73485	1.4245	1.92605		expressed protein
LOC_Os07g26860	0.307577	0.00367124	4.95025	3.41709	6.0806	1.8512	1.05189	1.54077		expressed protein
LOC_Os01g56510	0.308112	0	33.6295	32.9129	33.3912	9.70802	10.6614	10.4213		periplasmic beta-glucosidase precursor, putative, expressed
LOC_Os01g52690	0.308144	0	251.301	342.074	342.419	103.156	95.4605	89.7423		retrotransposon protein, putative, unclassified, expressed
LOC_Os09g36160	0.308189	0	18.4707	16.7874	16.8118	6.2082	4.29418	5.54503		LRP1, putative, expressed
LOC_Os05g02070	0.308807	0	8678.7	10001.9	9697.27	3131.72	2636.13	2995.43	OsMT2b, MT2b, OsMT-I-2c, MT-I-2c, MT2C, MT2BL, OsMT2C, OsMT2BL, MTE, OsMT2b1, OsMT2b2, MT2b1, MT2b2, MTb, met1, OsMTe, OsMT-I-2c, OsB22EL8, MTe, MT-I-2c, B22EL8	metallothionein gene
LOC_Os11g10990	0.309236	0.0312524	2.10795	1.90372	1.13522	0.581557	0.797284	0.212763		heat shock protein DnaJ, putative, expressed
LOC_Os08g23810	0.309637	0	477.824	407.759	415.918	133.986	124.326	144.681		enoyl-acyl-carrier-protein reductase NADH, chloroplast precursor, expressed
LOC_Os09g34230	0.309758	5.39121e-10	3.38223	3.9944	2.64532	1.11128	1.12258	0.87052	OsUGT74H4	UDP-glucoronosyl/UDP-glucosyl transferase, putative, expressed
LOC_Os08g30150	0.309956	1.22322e-05	1.97074	2.36791	2.26287	0.775031	0.565438	0.705711		1-aminocyclopropane-1-carboxylate oxidase homolog 1, putative, expressed
LOC_Os03g53740	0.31058	0	15.3077	18.6735	18.2827	6.53056	5.39176	4.30975		expressed protein
LOC_Os11g37850	0.310896	0	2.44494	2.4399	2.36754	0.737163	0.972196	0.545375		stripe rust resistance protein Yr10, putative, expressed
LOC_Os01g64000	0.311191	0	12.1192	11.0868	9.48574	3.8181	3.18755	3.16773	OsABI5, OsbZIP10, OsABF1, OREB1, OsABI5-1, OsABI5-2, OsOREB1, OREB1	bZIP transcription factor;ABRE binding factor
LOC_Os01g56310	0.311262	0	37.4759	32.8603	32.763	11.4859	10.0448	10.5602		radical SAM enzyme, putative, expressed
LOC_Os01g72710	0.312473	0	45.272	35.427	39.0271	12.4172	11.7441	13.2499		expressed protein
LOC_Os08g30900	0.31278	0	2.83597	3.28631	3.8009	0.891474	0.913226	1.29907		YDG/SRA domain containing protein, expressed
LOC_Os06g45590	0.312801	0	12.6028	9.41124	10.1887	3.00496	3.4272	3.6409		glyceraldehyde-3-phosphate dehydrogenase, putative, expressed
LOC_Os12g42090	0.313014	0	290.206	293.995	283.72	93.7591	87.5613	90.3511		methyltransferase domain containing protein, putative, expressed
LOC_Os09g34290	0.313071	0	8.51096	6.83232	6.699	1.90082	2.82375	2.17623		transposon protein, putative, CACTA, En/Spm sub-class, expressed
LOC_Os08g22380	0.313285	0	3.09183	3.42332	3.20451	0.977154	1.00684	1.06104		retrotransposon protein, putative, unclassified, expressed
LOC_Os03g11550	0.313956	0	102.256	97.417	97.4599	30.7162	30.4837	32.0868	MODD	protein of unknown function DUF1675 domain containing protein, expressed
LOC_Os12g08170	0.313997	0	141.393	128.449	137.47	44.4952	40.3012	43.0983		2-oxo acid dehydrogenases acyltransferase domain containing protein, expressed
LOC_Os09g30250	0.314375	0	4.82743	4.61031	4.31657	1.73819	1.17701	1.4088	OsSub58, SUB58	OsSub58 - Putative Subtilisin homologue, expressed
LOC_Os04g58960	0.315395	0	45.4037	31.6136	38.2174	11.2561	12.1477	12.9407		regulator of chromosome condensation, putative, expressed
LOC_Os09g25620	0.31571	0	209.301	170.482	210.467	53.8523	66.0444	66.4512	SAMDC1, SAMDC, OsSAMDC4	CPuORF8 - conserved peptide uORF-containing transcript, expressed
LOC_Os01g16920	0.315843	0	23.7766	46.4652	29.611	13.5879	7.75052	10.1994	OsEnS-4	embryonic protein DC-8, putative, expressed
LOC_Os06g40870	0.315994	0	6.58352	7.595	6.12953	1.73825	2.20907	2.4699		expressed protein
LOC_Os07g42420	0.316318	0	132.637	108.965	123.245	38.1659	38.9518	38.2898		3-oxoacyl-synthase, putative, expressed
LOC_Os06g09630	0.31705	0	251.298	218.082	231.672	72.6241	74.1402	75.5041	OsKASI, KASI	3-oxoacyl-synthase, putative, expressed
LOC_Os02g33670	0.31751	1.21821e-05	2.03004	2.03785	2.43317	0.784705	0.475612	0.803836		expressed protein
LOC_Os09g33680	0.317728	0	24.9713	26.1713	23.4615	8.32698	6.79944	8.57738	Os9bglu31, Os9BGlu31	Os9bglu31 - beta-glucosidase, dhurrinase, similar to G. max hydroxyisourate hydrolase, expressed
LOC_Os07g09890	0.317785	0	8.37535	6.61628	7.21457	2.42918	2.19708	2.43053	OsHXK4	hexokinase, putative, expressed
LOC_Os03g02820	0.318474	0	28.3661	25.2519	26.3448	8.7211	8.63707	8.10791		expressed protein
LOC_Os02g52340	0.318614	0	45.3375	33.4978	32.144	11.5898	11.3795	12.3902	OsMADS22, RMD1	STMADS11-like MADS-box gene of rice
LOC_Os01g47710	0.319693	0	9.41097	10.3579	9.83822	3.26738	3.07726	3.12054	OsWOX7, Os WOX7, WOX7, OsWOX9A	DWARF TILLER1;WUSCHEL-Related Homeobox Transcription Factor
LOC_Os09g30190	0.320321	0	11.9284	6.01108	9.08097	3.19585	2.74951	2.70986	OsRLCK275	receptor-like protein kinase 2 precursor, putative, expressed
LOC_Os07g03260	0.3208	0	5.79062	6.6817	7.61748	1.83924	2.44029	2.16529	OsCslC10, OsCSLC10	CSLC10 - cellulose synthase-like family C, expressed
LOC_Os03g08110	0.321079	0	13.1229	13.7311	14.6574	5.2083	3.90353	4.21659		hydrolase protein, putative, expressed
LOC_Os06g05130	0.321081	0	34.0243	35.5107	33.9819	11.0357	12.0115	10.1902	FATB1, OsFATB1	myristoyl-acyl carrier protein thioesterase, chloroplast precursor, putative, expressed
LOC_Os09g27650	0.321727	0	12.9549	15.0375	13.3831	4.47689	4.54317	4.29152	OsIDD13	ZOS9-14 - C2H2 zinc finger protein, expressed
LOC_Os06g46995	0.32341	0	7.3314	7.1823	8.10428	2.44729	2.73801	2.12957		armadillo/beta-catenin repeat family protein, putative, expressed
LOC_Os04g48830	0.323985	0	16.0185	16.0032	17.3668	5.93117	4.94104	5.1289	OsOFP11, OsOFP16	DUF623 domain containing protein, expressed
LOC_Os02g37600	0.324719	0.00284438	1.87823	2.34962	1.98411	0.524349	0.794523	0.698272		expressed protein
LOC_Os09g02360	0.325327	0	65.7743	51.402	61.1535	18.6844	19.5596	19.7716	CycD3;1, CycD3;os;1, Orysa;CycD3;1, Orysa;CYCD3;1	rice cyclin gene
LOC_Os07g32570	0.325657	0.00488329	1.53122	1.10629	1.01493	0.482792	0.304814	0.401832	OsAPRL1	OsAPRL1 adenosine 5%27-phosphosulfate reductase-like OsAPRL1, expressed
LOC_Os05g13630	0.325823	0.000333369	3.59778	4.18786	2.7573	1.34708	1.28916	0.7989	OsGRP5	RNA recognition motif containing protein, putative, expressed
LOC_Os05g44340	0.326128	2.1499e-07	2.1214	4.51915	2.38675	0.832018	1.33076	0.781277	Oshsp101, OsHSP101, ClpB-cyt, OsClpB-cyt, ClpB-C/Hsp100, OsClpB-C	ATPase/chaperone/heat shock protein
LOC_Os08g35010	0.326745	3.722e-06	3.8524	3.81584	3.34755	1.12405	1.38781	1.08748		ARID/BRIGHT DNA-binding domain containing protein, expressed
LOC_Os12g03860	0.327375	0	28.6837	24.0724	24.719	8.46463	8.24822	8.65054	OsZIFL10, Os-mfs2, mfs2	major facilitator superfamily antiporter, putative, expressed
LOC_Os08g12840	0.327459	0	119.573	100.233	104.802	35.4143	33.1767	37.7047		FabA-like domain containing protein, expressed
LOC_Os02g53000	0.327539	0	25.5571	24.6782	24.1248	7.11554	8.21789	9.02238	LYP5, Os-LYP5	lysM domain-containing GPI-anchored protein precursor, putative, expressed
LOC_Os12g06060	0.327663	0.00450246	1.89049	1.14665	1.51629	0.668512	0.39097	0.432512	OsCAT9	amino acid permease family protein, putative, expressed
LOC_Os01g07140	0.327776	0	14.0787	13.6657	15.2992	4.34429	5.10622	4.65815		kelch repeat-containing protein, putative, expressed
LOC_Os10g35630	0.327883	0	22.6572	20.9493	21.3763	8.56827	7.30827	5.43022		cystathionin beta synthase protein, putative, expressed
LOC_Os09g28660	0.328068	1.1383e-08	3.87587	4.01544	4.99314	1.52013	1.29565	1.4112		gibberellin receptor GID1L2, putative, expressed
LOC_Os04g51930	0.32831	9.84522e-06	0.672803	0.516475	0.632996	0.221872	0.170764	0.205635		retrotransposon protein, putative, LINE subclass, expressed
LOC_Os12g02760	0.328382	0.000476705	3.06134	2.90127	2.27572	0.854641	1.20867	0.642016		DUF567 domain containing protein, putative, expressed
LOC_Os01g24470	0.328608	3.41216e-12	1.99787	1.74804	2.09347	0.566744	0.572509	0.77961	OsPHS1b, OsPP4, OsSTA14	PHS1, putative, expressed
LOC_Os07g48760	0.328835	0	11.7812	12.68	12.0604	3.60092	4.46987	3.93879	OsCIPK03, CIPK3, OsCIPK3	calcineurin B-like–interacting protein kinase gene
LOC_Os01g23610	0.329297	0	121.553	114.734	115.069	39.3612	36.188	40.1516		dihydrolipoyl dehydrogenase, putative, expressed
LOC_Os11g06410	0.329566	0	19.1998	22.3421	21.1872	6.24287	7.37391	7.05663		SANT domain transcription factor
LOC_Os09g32760	0.329713	0	162.176	153.801	160.359	51.9465	52.4112	52.6966		acyl-ACP thioesterase, putative, expressed
LOC_Os03g18590	0.330126	0	241.026	194.46	205.846	70.9078	69.0849	71.728		malonyl CoA-acyl carrier protein transacylase, mitochondrial precursor, putative, expressed
LOC_Os08g40010	0.330452	0	8.19584	5.97375	7.8708	2.08005	2.73156	2.47168		expressed protein
LOC_Os08g01700	0.33072	0	20.5979	22.872	25.3857	7.79494	7.77742	7.19957	OsbHLH124	basic helix-loop-helix family protein, putative, expressed
LOC_Os05g26032	0.330783	2.39022e-08	3.36274	3.82428	4.03472	1.46033	0.969404	1.28222		expressed protein
LOC_Os09g29060	0.331632	3.4804e-10	4.8349	4.14306	3.64253	1.39371	1.7884	1.00324		expressed protein
LOC_Os10g20650	0.33183	0	57.3926	55.2354	60.9093	19.2603	19.8278	18.4968		glucan endo-1,3-beta-glucosidase-related, putative, expressed
LOC_Os08g44750	0.332008	0	5.55311	6.60738	6.41612	2.16263	2.32557	1.67938	OsUMAMIT12	auxin-induced protein 5NG4, putative, expressed
LOC_Os01g72100	0.332092	0	17.3079	13.7834	13.9459	6.83364	4.21361	3.90923	OsCML10	calmodulin
LOC_Os01g02880	0.332164	0	396.195	345.188	353.586	125.423	108.594	129.692		fructose-bisphospate aldolase isozyme, putative, expressed
LOC_Os02g43340	0.332622	8.06859e-06	2.81473	1.69657	2.27962	0.660068	0.793788	0.804952		hydrolase, alpha/beta fold family domain containing protein, expressed
LOC_Os01g45760	0.332641	7.39921e-06	2.87288	1.92531	2.09548	0.721824	0.937499	0.63379	OsYUCCA1, OsYUC1	YUCCA-like gene
LOC_Os05g27320	0.332961	0	5.68412	4.66175	4.90758	1.40985	1.8496	1.81935		VHS and GAT domain containing protein, expressed
LOC_Os01g45860	0.333248	0	28.5164	31.591	30.7265	11.0255	9.3665	9.87817	OsSLRL1, OsGAI, OsSLRL	GRAS-domain protein; SLR1 Like-1
LOC_Os09g27580	0.333308	2.66865e-07	1.66301	1.14079	1.45774	0.42673	0.57476	0.418919	OsHAK17, FCO3, FCO4	potassium transporter
LOC_Os03g54850	0.333444	5.41012e-07	2.12038	1.8646	2.20837	0.630303	0.727674	0.707162		NLI interacting factor-like phosphatase, putative, expressed
LOC_Os02g30810	0.333794	2.01273e-05	4.30649	2.89883	2.82792	0.935805	1.65432	0.758907	OsSAUR10	OsSAUR10 - Auxin-responsive SAUR gene family member, expressed
LOC_Os07g47510	0.334085	0	379.797	452.137	365.624	138.738	130.194	131.154		stress-related protein, putative, expressed
LOC_Os07g46520	0.334127	0	20.8232	21.7744	20.9972	7.47417	7.09261	6.68194		rhythmically expressed gene 2 protein, putative, expressed
LOC_Os04g20164	0.33441	0	11.347	13.1343	12.5678	4.76891	3.83997	3.7807	OsDAO2, OsCuDAO2, CuDAO2	amine oxidase precursor, putative, expressed
LOC_Os12g06464	0.33502	0	8.89882	8.94979	8.58305	2.17754	3.84946	2.82812		expressed protein
LOC_Os04g52540	0.335683	0	6.05354	4.48959	4.12072	1.49658	1.67613	1.74969	OsAGO2	retrotransposon protein, putative, unclassified, expressed
LOC_Os09g29430	0.336897	0	25.0038	18.5639	22.5263	7.48345	7.17718	7.60624		citrate transporter, putative, expressed
LOC_Os06g16420	0.337126	1.36486e-11	2.35884	3.18043	2.73142	0.980186	0.944102	0.863978	NAA, OsATL4	amino acid transporter, putative, expressed
LOC_Os01g12470	0.337914	0	12.009	15.1092	15.3834	5.01216	4.01001	5.33972		mitochondrial carrier protein, putative, expressed
LOC_Os03g11490	0.338055	0	2.46222	2.58277	2.90798	1.04516	0.698688	0.944687		expressed protein
LOC_Os02g49130	0.338157	3.92955e-05	3.57547	4.82755	5.54501	1.60557	1.54467	1.56639		expressed protein
LOC_Os02g07460	0.338234	0	16.9739	19.373	20.1238	6.75	6.81865	5.53164		expressed protein
LOC_Os03g06860	0.338722	0	25.6193	21.2203	23.9458	6.80775	8.25239	8.91639		transposon protein, putative, unclassified, expressed
LOC_Os12g04700	0.338725	0.0053394	0.726852	0.595163	0.806219	0.21915	0.239827	0.261908		phosphatidylinositol-4-phosphate 5-kinase, putative, expressed
LOC_Os11g06130	0.338895	0	26.2422	28.5807	27.646	9.52842	8.91706	9.50288		PHD-finger family protein, expressed
LOC_Os10g06740	0.338905	0	4.3584	4.6556	5.62538	1.65654	1.68948	1.61534		receptor-like protein kinase precursor, putative, expressed
LOC_Os10g02100	0.339325	1.25547e-06	1.79692	2.19606	2.03988	0.566042	0.707942	0.773122		peptide transporter PTR2, putative, expressed
LOC_Os02g01920	0.339382	0	175.235	162.937	165.341	57.441	53.3716	60.0703		GHMP kinases ATP-binding protein, putative, expressed
LOC_Os03g17200	0.339702	0	110.452	127.151	113.667	39.1505	37.1372	43.0395		plant-specific domain TIGR01589 family protein, expressed
LOC_Os03g20380	0.340028	0	23.8153	23.1087	23.2359	7.77843	8.47828	7.5996	OsCK1, CIPK31, OsCIPK31, Os-CIPK3	CAMK_KIN1/SNF1/Nim1_like.2 - CAMK includes calcium/calmodulin depedent protein kinases, expressed
LOC_Os01g49640	0.340357	0	65.8912	58.7793	59.0692	17.7706	19.6391	25.1275	OsLTP2.1, OsLtpII.1	LTPL149 - Protease inhibitor/seed storage/LTP family protein precursor, expressed
LOC_Os05g29920	0.340614	0	92.5835	116.983	103.726	38.2742	32.971	35.4666		expressed protein
LOC_Os02g46260	0.341151	0	28.1587	41.3664	39.3006	12.7762	11.4028	12.947	OsSCP9	OsSCP9 - Putative Serine Carboxypeptidase homologue, expressed
LOC_Os03g25120	0.341253	0	5.56333	6.37116	4.97281	1.99408	2.09336	1.68222	OsHsfB4d, HSfB4d, OsHsf-10, HSF10	heat shock transcription factor gene
LOC_Os05g34780	0.341991	0	16.6617	13.8666	17.601	4.25496	5.96207	6.24277		retrotransposon protein, putative, Ty3-gypsy subclass, expressed
LOC_Os03g23980	0.342005	0	19.1337	20.3862	18.0207	6.85785	6.3659	6.45544		NAD dependent epimerase/dehydratase family protein, putative, expressed
LOC_Os02g03320	0.34205	4.16437e-07	1.99366	2.65811	2.35545	1.00183	0.665805	0.729183	OsNIN5	plant neutral invertase domain containing protein, expressed
LOC_Os10g13810	0.342218	0	11.1004	13.7961	11.1901	4.07994	4.02484	4.2447	OsGT43G	glycosyltransferase family 43 protein, putative, expressed
LOC_Os04g39780	0.342778	0	13.424	8.70628	12.1937	3.89481	3.3132	4.55751	DWA1	AMP-binding enzyme family protein, expressed
LOC_Os09g28600	0.34448	0.000251859	2.34961	2.15949	2.83665	1.10841	0.681548	0.740501		expressed protein
LOC_Os10g05690	0.344755	0	20.2545	21.4076	24.7482	7.86607	7.57025	7.45895	OsLAX4, OsRAU4, OsAUX4, LAX4, RAU4, AUX4	transmembrane amino acid transporter protein, putative, expressed
LOC_Os08g16660	0.344912	0	45.941	47.9651	49.3899	16.9432	15.7947	16.6866		aspartic proteinase nepenthesin precursor, putative, expressed
LOC_Os02g44770	0.344913	0	20.8165	19.9405	19.8051	6.87309	7.11234	6.90327		uncharacterized mscS family protein, putative, expressed
LOC_Os04g40040	0.345232	0	77.798	71.8981	78.3645	27.5277	28.2497	22.9566	OsDAO4, OsCuDAO4, CuDAO4	copper methylamine oxidase precursor, putative, expressed
LOC_Os09g39330	0.3453	0.0108312	0.696514	0.796772	0.800701	0.226474	0.270373	0.295266		retrotransposon protein, putative, unclassified, expressed
LOC_Os01g62810	0.345708	0	4.73669	4.54354	4.08681	1.27112	1.43511	1.91486		regulator of chromosome condensation, putative, expressed
LOC_Os03g54870	0.345958	5.06947e-06	1.43186	1.77408	1.59219	0.555421	0.535568	0.568962		NLI interacting factor-like phosphatase, putative, expressed
LOC_Os07g47480	0.346289	0	40.1988	39.6811	41.7745	12.6047	15.0969	14.426		heavy metal-associated domain containing protein, expressed
LOC_Os06g09120	0.34642	5.46162e-06	2.01464	1.59071	1.79378	0.694199	0.642822	0.533342	OsGLR4.8	glutamate receptor 2.8 precursor, putative, expressed
LOC_Os02g54254	0.347508	0	17.4712	18.6614	17.2828	5.80697	6.57554	6.1798		lysine ketoglutarate reductase/saccharopine dehydrogenase
LOC_Os02g55130	0.347736	0	26.3418	23.1005	25.0339	9.0893	8.54345	8.26528	OsSCP10, SCP10	OsSCP10 - Putative Serine Carboxypeptidase homologue, expressed
LOC_Os03g29340	0.347946	0	11.9997	15.724	11.6589	4.01996	4.46694	5.21609		domain of unknown function domain containing protein, expressed
LOC_Os04g40500	0.348219	0	7.03326	8.72043	6.88612	2.41366	2.43821	3.03175		glycosyl hydrolase family 5 protein, putative, expressed
LOC_Os07g48080	0.348352	4.43581e-11	4.81053	3.34109	3.53906	1.35256	1.54074	1.17918		expressed protein
LOC_Os01g60850	0.348497	1.06959e-06	1.29227	1.57068	1.14329	0.487035	0.393591	0.515539		expressed protein
LOC_Os10g40550	0.348812	0	7.02642	7.16331	6.45438	2.03756	2.87596	2.28738	OsTPP2	CPuORF23 - conserved peptide uORF-containing transcript, expressed
LOC_Os03g49940	0.348975	1.36486e-11	3.83577	6.3833	5.1306	1.58083	2.21327	1.56255		integral membrane protein, putative, expressed
LOC_Os06g05590	0.349202	1.01755e-05	2.2415	2.33185	2.17378	0.664746	0.783425	0.907935	OsFbox293, Os_F0585	OsFBX186 - F-box domain containing protein, expressed
LOC_Os08g43580	0.349206	0	386.495	388.316	380.837	141.718	127.793	134.049		acyl carrier protein, putative, expressed
LOC_Os09g35540	0.349255	0.000166906	2.14895	3.0636	2.14848	0.848466	1.12981	0.592603		expressed protein
LOC_Os03g19390	0.349887	0	12.0794	13.5883	13.904	4.81021	4.04928	4.98614		TENA/THI-4 family protein, putative, expressed
LOC_Os01g50200	0.349957	0	5.00263	3.79398	4.3296	1.69611	1.34621	1.5513		UDP-glucoronosyl and UDP-glucosyl transferase domain containing protein, expressed
LOC_Os06g51160	0.350109	8.0963e-07	2.36899	3.03091	2.73304	1.0338	1.10761	0.706004		glycosyl transferase family 8, putative, expressed
LOC_Os03g50364	0.350166	4.26871e-05	3.53125	2.64771	2.64593	0.742808	1.41735	0.93001		expressed protein
LOC_Os03g18400	0.350347	0	15.087	15.0962	14.094	4.75249	5.54381	5.21609		expressed protein
LOC_Os06g49190	0.350643	0	88.5992	92.5453	100.273	35.339	35.7864	27.5517	OsLTP2.6, OsLtpII.6	LTPL154 - Protease inhibitor/seed storage/LTP family protein precursor, expressed
LOC_Os06g05320	0.350998	5.62222e-07	2.55579	2.44382	2.69987	0.844941	0.853535	1.00403		transferase family protein, putative, expressed
LOC_Os04g20400	0.351344	0	8.56262	8.0182	8.27552	2.8075	3.20598	2.71964		cytokinin-O-glucosyltransferase 1, putative, expressed
LOC_Os04g49620	0.352018	0	13.1035	13.6697	11.34	4.8625	4.19563	4.35842		DUF581 domain containing protein, expressed
LOC_Os03g52300	0.352166	5.32297e-10	7.18791	6.31532	8.13069	3.19645	2.1957	2.22658		SCP-like extracellular protein, expressed
LOC_Os07g49110	0.352257	0	11.7323	9.50012	10.6561	3.23877	4.14076	3.8534		D-alanine--D-alanine ligase family, putative, expressed
LOC_Os02g01980	0.352547	5.82821e-05	2.69985	1.67566	1.91148	0.894844	0.64151	0.680102	OsGELP30	GDSL-like lipase/acylhydrolase, putative, expressed
LOC_Os07g22930	0.352581	0	68.2112	53.1678	56.7668	17.9558	21.0349	23.8202	GBSS2	starch synthase, putative, expressed
LOC_Os08g02070	0.353866	0.000536134	2.44351	2.64529	2.48198	0.51949	1.24038	0.919177	OsMADS26, FDRMADS3, RMADS220	MADS-Box gene
LOC_Os01g62200	0.353918	0.00248717	1.96651	1.34185	1.05254	0.606091	0.532396	0.404913	OsDSR2	domain of unknown function DUF966 domain containing protein, expressed
LOC_Os01g45620	0.354396	0	12.4786	12.9744	12.8838	3.91558	4.70062	4.9702		mitogen-activated protein kinase
LOC_Os09g27340	0.354856	7.89775e-07	2.48485	2.22174	2.80596	1.06208	0.956895	0.646902		ATPase, putative, expressed
LOC_Os11g26950	0.355743	0	6.28991	7.98299	6.57805	2.71824	1.97959	2.71975	UGT	UDP-glucoronosyl and UDP-glucosyl transferase domain containing protein, expressed
LOC_Os09g34960	0.355971	0	155.717	140.981	146.973	51.4339	51.8004	54.7		hydroxymethylglutaryl-CoA synthase, putative, expressed
LOC_Os05g36050	0.356158	0	74.7724	76.2276	77.5755	26.2435	31.0042	24.1613		serine/threonine-protein kinase, putative, expressed
LOC_Os06g07560	0.356328	0	14.27	14.3825	16.1348	5.87702	5.09501	4.98696	OsCML30	calmodulin
LOC_Os09g26770	0.356665	0	30.4454	31.3563	32.0158	11.9649	10.8587	10.6378		ribosomal L18p/L5e family protein, putative, expressed
LOC_Os02g05686	0.357276	1.70645e-05	2.38537	2.18298	1.98623	0.479468	1.11114	0.751182		expressed protein
LOC_Os11g05340	0.357773	1.39626e-08	1.97775	1.65181	1.53768	0.524747	0.835284	0.488672		transposon protein, putative, unclassified, expressed
LOC_Os08g17820	0.358118	0	4.03102	2.59177	3.15682	1.13211	1.16252	1.20763	OsFH6, FH6	retrotransposon protein, putative, unclassified, expressed
LOC_Os04g54350	0.358145	0	3.41047	3.13269	3.44108	1.36225	1.04318	1.17038		SPRY-domain containing protein, putative, expressed
LOC_Os01g42960	0.358904	0	50.316	49.3186	51.5684	16.5587	19.8322	17.8765		TTL1, putative, expressed
LOC_Os04g40510	0.358973	0	16.2943	17.4912	15.6595	6.69021	4.96278	6.09638		glycosyl hydrolase family 5 protein, putative, expressed
LOC_Os02g47770	0.359095	0	28.9704	25.5123	26.7284	11.8165	9.45383	7.89216	OsZHD7	ZF-HD protein dimerisation region containing protein, expressed
LOC_Os06g06440	0.359198	0	10.6298	12.0768	10.5743	3.60806	4.04842	4.29798	OsABCC15, OsMRP15	ABC transporter, ATP-binding protein, putative, expressed
LOC_Os04g50760	0.359309	0	8.5942	6.99839	7.42283	2.79763	2.63402	2.83801		ara54-like RING finger protein, putative, expressed
LOC_Os08g42570	0.360026	0.000686212	2.11322	1.87927	1.57362	0.905236	0.492393	0.606315		plant protein of unknown function domain containing protein, expressed
LOC_Os01g53330	0.360337	0	6.59224	6.49628	6.83432	1.84893	2.5837	2.74631		anthocyanidin 5,3-O-glucosyltransferase, putative, expressed
LOC_Os03g46570	0.360539	0	9.11565	9.37563	10.0523	4.42429	2.7538	3.11299	SIP31	protein binding protein, putative, expressed
LOC_Os09g12600	0.360899	0	331.972	301.856	313.595	113.185	112.888	115.851	OsPPT1	phosphate/phosphate translocator, putative, expressed
LOC_Os05g50100	0.361039	3.85321e-05	4.274	4.9995	3.61196	1.84091	1.23976	1.57149		expressed protein
LOC_Os01g68870	0.361091	0	5.98074	6.12145	7.22738	2.14587	2.50568	2.32819	Msp1	MULTIPLE SPOROCYTE 1
LOC_Os07g07520	0.361297	0	53.1271	60.3494	53.3629	20.2181	19.5211	20.5394	OsFbox345, Os_F0495	OsFBX217 - F-box domain containing protein, expressed
LOC_Os05g38000	0.362453	0	12.4112	10.9627	12.4138	4.69351	4.09706	4.18081	bgl, OsRopGEF10, Os RopGEF10, RopGEF10	guanine nucleotide exchange factors for Rop
LOC_Os02g45530	0.362712	0.0013291	1.34887	1.85959	1.19227	0.49799	0.503056	0.595153		HOTHEAD precursor, putative, expressed
LOC_Os10g06680	0.363158	0	6.48953	5.16172	5.74034	2.27881	1.98447	2.05263		expressed protein
LOC_Os03g57780	0.363847	0	30.0151	27.0921	27.16	10.0308	10.4143	10.2153		protein kinase, putative, expressed
LOC_Os04g39814	0.363881	0	4.66414	5.00675	4.99575	1.79662	1.6664	1.87388	Os4bglu9, Os4BGlu9	Os4bglu9 - beta-glucosidase homologue, similar to Os4Bglu12 exoglucanase/beta-glucosidase, expressed
LOC_Os09g35720	0.363976	6.82432e-12	3.42745	3.41198	3.07509	1.01452	1.14401	1.45012		generative cell specific-1, putative, expressed
LOC_Os11g32110	0.36416	0	108.505	82.0549	90.8016	32.7102	34.0675	35.6831	OsARF1, arf1, OsARF23, ARF23	auxin response factor
LOC_Os06g43044	0.364201	0	35.4421	23.8999	24.4757	9.71455	9.55608	11.2559	OsGELP87	GDSL-like lipase/acylhydrolase, putative, expressed
LOC_Os02g44900	0.364421	0	11.3244	11.0213	11.4442	3.84857	4.25322	4.21196		expressed protein
LOC_Os06g42000	0.364663	0	116.651	124.548	132.043	47.7911	42.3602	45.9561	OsPrxII E1, PrxII E1, OsPrxIIE1, PrxIIE1	peroxiredoxin, putative, expressed
LOC_Os03g19550	0.364822	2.44625e-07	4.94681	3.94929	4.33732	1.44177	1.85822	1.52785		retrotransposon protein, putative, unclassified, expressed
LOC_Os01g54570	0.365126	0	12.4137	10.9329	10.5518	4.41012	4.10327	3.86377		DUF623 domain containing protein, expressed
LOC_Os09g14880	0.365253	0	6.96557	6.85037	8.09146	2.09269	2.64246	3.2666		transposon protein, putative, Pong sub-class, expressed
LOC_Os02g55420	0.366525	0	378.357	342.266	348.164	132.689	123.775	135.273	AST	aminotransferase, classes I and II, domain containing protein, expressed
LOC_Os04g31710	0.366587	0	131.209	184.886	166.807	60.6601	59.8532	56.5126		expressed protein
LOC_Os10g37350	0.366759	0.0198201	4.64934	5.78764	6.63708	1.38917	3.06175	1.81114		expressed protein
LOC_Os01g11960	0.367519	0	23.6509	29.5555	27.7151	9.83952	10.3026	9.59808		histone-lysine N-methyltransferase ATX5, putative, expressed
LOC_Os03g51960	0.368253	5.68193e-08	5.30388	6.07366	5.27004	2.63886	1.59942	1.89224		expressed protein
LOC_Os01g51740	0.368931	0	28.4283	27.602	23.8585	8.6955	11.4077	9.37022		expressed protein
LOC_Os07g05174	0.369386	0.0181473	3.45521	4.1403	3.2939	1.18575	1.88227	0.954374		expressed protein
LOC_Os01g62790	0.370484	0	48.6348	48.1681	49.2428	15.9239	17.5506	20.6332	OsNTP3	expressed protein
LOC_Os08g20020	0.371114	0	19.5426	20.4767	20.8366	6.15331	7.87908	8.55208		octicosapeptide/Phox/Bem1p, putative, expressed
LOC_Os03g53730	0.37211	0.000643731	3.9126	2.86901	3.76303	0.821661	1.71932	1.38278	OS-QR	flavoprotein wrbA, putative, expressed
LOC_Os01g15900	0.372998	0.00273742	1.51601	1.06032	1.14773	0.330119	0.538692	0.520256	OsDof, OsDof2, Dof2, OsDof-2	Dof Transcription Factor; DNA binding with one finger
LOC_Os06g03980	0.373086	0	16.3111	15.8507	16.553	5.8327	5.64395	6.69818		expressed protein
LOC_Os10g11140	0.373689	0	119.425	141.857	127.859	45.5671	47.012	52.8386	OspPGM, pPGM	phosphoglucomutase, putative, expressed
LOC_Os03g15190	0.373882	0	18.9295	20.0488	18.1998	6.01064	7.85432	7.51289		expressed protein
LOC_Os10g35520	0.374463	0	20.0907	18.3202	19.8085	7.7911	8.07637	5.93355		hydrolase, alpha/beta fold family domain containing protein, expressed
LOC_Os07g13980	0.374874	0	31.2248	38.9918	33.8492	11.8169	13.8055	13.3892	OsAGPL4, APL4, OsAPL4, OsSTA193	large subunit of ADP-glucose pyrophosphorylase
LOC_Os02g39570	0.37501	0	91.6659	93.198	93.6937	34.3618	34.2117	35.8885		ACT domain containing protein, expressed
LOC_Os06g06610	0.375076	3.44536e-07	2.66371	1.75268	2.61289	0.812685	0.893388	0.930439		expressed protein
LOC_Os03g60620	0.375482	0	83.3442	46.5628	54.1338	17.2115	26.1467	25.7459	OsHSP70, hsp70, OsMed37_4, Med37_4	DnaK family protein, putative, expressed
LOC_Os03g16709	0.375838	0	15.5822	14.7272	18.1417	5.59775	6.05859	6.55339		expressed protein
LOC_Os06g29180	0.375961	0	324.123	338.867	328.921	121.038	122.972	128.909	OsFDH, FDH 1	erythronate-4-phosphate dehydrogenase domain containing protein, expressed
LOC_Os01g65070	0.375978	0	11.0345	10.002	10.3477	3.40685	3.91619	4.47671		hydrolase, alpha/beta fold family domain containing protein, expressed
LOC_Os06g42850	0.376218	3.41216e-12	4.19124	4.78936	4.8824	1.99073	1.86526	1.35951		extracellular ligand-gated ion channel, putative, expressed
LOC_Os09g24910	0.377249	0	29.5527	30.1921	30.2098	10.6956	11.5247	11.7149	OsPFK08, PFK08, PFK8	phosphofructokinase, putative, expressed
LOC_Os01g48060	0.377483	0	84.2183	65.4066	73.9602	25.3649	30.1667	28.8681	OsARF2, OsETT2, ARF3a	OsETTIN2; auxin response factor
LOC_Os01g52514	0.377631	0	29.6243	22.9162	26.2746	10.3259	9.34436	10.0928		B3 DNA binding domain containing protein, expressed
LOC_Os12g38850	0.37767	0	27.2863	29.4601	30.2106	9.53942	11.9467	11.3549		DUF1336 domain containing protein, expressed
LOC_Os05g49200	0.377963	0	224.632	236.113	221.392	81.2648	89.0496	87.5078	Oryzasin	aspartic proteinase oryzasin-1 precursor, putative, expressed
LOC_Os10g07450	0.378915	0	15.9632	17.2724	14.7982	7.2686	4.89502	6.03714		expressed protein
LOC_Os01g71256	0.379321	5.45946e-11	4.77459	3.09505	4.39527	1.30246	1.47729	1.87259		expressed protein
LOC_Os01g04160	0.38036	0	65.0185	69.3816	66.9716	24.9665	23.4084	28.2189		expressed protein
LOC_Os06g43910	0.381378	0.00684886	1.48499	1.27121	1.14088	0.35276	0.438582	0.694923	OsRR25, Rrb3, Orr5, OsRR21, OsRRB3	two-component response regulator, putative, expressed
LOC_Os01g72210	0.381389	0	14.2572	19.5695	16.9605	6.12244	6.371	6.8762	OsEnS-22, OsOSCA2.5, OsIOSCA2.5, OsDDP2, DDP2, OsDDP2.1, OsDDP2.2	early-responsive to dehydration protein-related, putative, expressed
LOC_Os03g44810	0.381871	0	23.5599	16.8363	19.7997	7.67316	7.31874	7.99517	OsRFPHC-1, OsNLA2, NLA2	expressed protein
LOC_Os01g66240	0.38286	0	35.1417	34.6132	34.3969	12.5234	13.7194	13.6327		mitochondrion protein, putative, expressed
LOC_Os05g44560	0.382959	0	45.7394	37.3864	43.2007	14.486	16.428	17.464	OsPHP3, Hpt5, OsHP4, OsHpt5, OsHpt5a, OsHpt5b, OsHpt5c	kinesin motor domain containing protein, expressed
LOC_Os12g32200	0.383142	0	62.8602	72.4897	69.6658	24.1401	23.7586	30.6514		expressed protein
LOC_Os01g41510	0.384267	1.17328e-05	4.03528	6.16984	4.3154	1.55212	1.71964	2.308	OsCBL5	calcineurin B, putative, expressed
LOC_Os01g08000	0.3844	0	8.0056	7.88886	7.87212	2.99577	2.93978	3.20032		fibronectin type 3 and ankyrin repeat domains 1 protein, putative, expressed
LOC_Os04g35864	0.384426	3.75338e-11	8.46361	7.90774	8.61265	2.02898	4.17806	3.39745		DDT domain-containing protein, putative, expressed
LOC_Os01g61330	0.385736	0	21.3172	21.5612	21.9493	9.79082	7.55467	7.66092		ankyrin homolog precursor, putative, expressed
LOC_Os06g05480	0.385762	0	17.5344	22.1031	16.7031	9.33679	5.7465	6.65075		expressed protein
LOC_Os10g41340	0.385991	0	16.9519	15.5629	17.4463	6.58339	6.52943	6.17168		palmitoyl-protein thioesterase 1 precursor, putative, expressed
LOC_Os12g37580	0.386107	0.00113101	0.896616	0.852161	1.08247	0.273553	0.325101	0.49451	OsABCC17, OsMRP17	ABC transporter, ATP-binding protein, putative, expressed
LOC_Os01g02430	0.3864	5.66325e-05	1.93471	2.28277	2.27086	1.13425	0.736574	0.636277	OsRLCK8	TAK14, putative, expressed
LOC_Os11g42490	0.386858	9.63253e-09	3.6161	2.9484	3.65809	1.50914	1.08892	1.35663		retrotransposon protein, putative, unclassified, expressed
LOC_Os01g24060	0.387143	0	5.65725	4.96316	5.9495	2.08135	2.46149	1.87208		importin subunit alpha, putative, expressed
LOC_Os05g44210	0.387203	0	34.795	32.3815	35.5718	13.4065	13.6777	12.7003	OsTPS1	trehalose-6-phosphate synthase, putative, expressed
LOC_Os06g06900	0.387571	0	28.2425	33.3872	30.3574	11.5909	11.1291	12.9315	OsbHLH108, OsbHLH108/SPT, bHLH108, SPT	helix-loop-helix DNA-binding domain containing protein, expressed
LOC_Os04g47860	0.387635	0	52.9971	50.8054	52.3703	20.7321	19.181	20.6249	OsIDD10	ZOS4-11 - C2H2 zinc finger protein, expressed
LOC_Os03g47730	0.387641	0	10.9616	11.1133	10.7759	3.71853	4.42337	4.59238		homeobox domain containing protein, expressed
LOC_Os01g03270	0.388062	0.0291644	4.14122	2.64916	3.00759	1.69081	1.44524	0.666167		expressed protein
LOC_Os11g37090	0.388068	2.83209e-10	2.89869	2.38799	2.31525	0.905946	0.861328	1.18279		pumilio-family RNA binding repeat domain containing protein, expressed
LOC_Os07g41240	0.38813	0	13.256	10.5759	11.3739	5.38138	4.29013	3.99289	ge1, ge, CYP78A13, OsCYP78A13, GE, BG2	GIANT EMBRYO; big grain2; cytochrome P450
LOC_Os03g11380	0.388222	0	49.8461	42.4206	43.4505	16.3601	17.0573	19.271		SNARE domain containing protein, putative, expressed
LOC_Os01g73270	0.388634	2.13071e-06	8.74385	7.54178	10.6898	3.65333	3.39126	3.43896		expressed protein
LOC_Os01g66230	0.388788	0	4.13399	4.34925	4.34964	1.63872	1.68883	1.66171		csAtPR5, putative, expressed
LOC_Os09g31210	0.389017	1.70608e-09	4.35034	4.28655	3.32666	1.53352	1.51616	1.60433		AGC_PVPK_like_CDK8.1 - ACG kinases include homologs to PKA, PKG and PKC, expressed
LOC_Os01g59050	0.389083	0.00183888	3.47781	2.19055	2.01861	1.07547	0.892405	1.02299		cytochrome P450, putative, expressed
LOC_Os03g28160	0.389358	0	43.1947	74.5305	65.4525	25.3234	20.9081	25.0902		jacalin-like lectin domain containing protein, expressed
LOC_Os07g06880	0.389781	2.64933e-05	4.947	2.55018	3.70008	1.63308	1.39307	1.33832	OsCDAP3	gibberellin receptor GID1L2, putative, expressed
LOC_Os05g33100	0.389917	0	69.687	69.0661	66.7157	26.3051	26.4773	27.3334		endo-1,3%3B1,4-beta-D-glucanase precursor, putative, expressed
LOC_Os02g01200	0.39001	3.58277e-10	6.76641	7.53808	7.39099	2.54436	3.83199	2.08511	OsGRL3	glutaredoxin, putative, expressed
LOC_Os01g59620	0.390406	0	14.2218	12.8934	14.5793	4.80282	5.47269	6.00229	OsSET4, SDG709, OsSUVH7	Histone H3K9 Methyltransferase Gene
LOC_Os07g47090	0.390413	0	35.3702	26.9726	32.7399	12.1865	11.9105	13.0244		KIP1, putative, expressed
LOC_Os03g39880	0.390433	2.70584e-09	3.43223	3.63845	4.01419	1.69393	1.15114	1.48283		expressed protein
LOC_Os06g30730	0.391238	0	19.4319	21.4138	25.4126	8.91561	8.12598	8.88118	OsABCG14	ABC-2 type transporter domain containing protein, expressed
LOC_Os04g55060	0.391318	0	149.951	137.78	153.686	55.7303	56.0975	60.9064		3-oxoacyl-synthase III, chloroplast precursor, putative, expressed
LOC_Os08g23470	0.391343	0.000172838	1.57666	2.38096	2.29354	0.649417	0.892191	0.904739		B3 DNA binding domain containing protein, expressed
LOC_Os01g03110	0.391436	0	23.0272	29.4542	24.5567	9.90652	11.3694	8.87953		expressed protein
LOC_Os10g40610	0.391662	0	8.44912	10.2568	8.97732	3.65333	3.04216	4.14698		flavin-containing monooxygenase family protein, putative, expressed
LOC_Os03g37984	0.391776	0	51.9995	45.4348	44.9582	18.7568	19.6781	17.351	OsPUT3, OsPUT3.1, OsPAR1, OsLAT5	amino acid permease family protein, putative, expressed
LOC_Os07g06470	0.392007	0.0100136	2.62496	2.21473	1.42394	0.606057	0.936339	0.912989	OsHAP2J, NF-YA, CBF-B, NF-YA5, OsNF-YA5, NFYA5	nuclear transcription factor Y subunit, putative, expressed
LOC_Os09g30010	0.392034	0	18.1173	25.3544	22.2685	8.49391	8.77755	8.50096	OsFLA10	fasciclin domain containing protein, expressed
LOC_Os03g30060	0.392888	9.59728e-07	5.47475	4.83205	5.44812	3.03021	1.85273	1.30698		expressed protein
LOC_Os06g21600	0.393181	0	44.8765	44.3538	42.361	15.6256	18.007	18.1066		selenoprotein O, putative, expressed
LOC_Os03g06730	0.393985	8.37927e-05	1.98721	2.76037	2.48909	1.16978	0.979925	0.701441		plant protein of unknown function domain containing protein, expressed
LOC_Os04g55570	0.394838	0	39.833	43.2372	45.1529	15.6651	16.9301	18.0322		plant protein of unknown function DUF869 domain containing protein, expressed
LOC_Os02g10730	0.395037	0.0290321	2.44506	4.46891	2.82889	1.34568	1.00475	1.49836		expressed protein
LOC_Os05g28320	0.395158	0.041964	1.86306	2.00997	2.34043	0.910904	0.766807	0.777592		myb-like DNA-binding domain containing protein, putative, expressed
LOC_Os02g52620	0.395279	4.5411e-06	4.83782	7.45963	6.10612	2.7152	2.3601	2.19924		expressed protein
LOC_Os06g50530	0.39548	0.0036699	6.33684	9.80431	8.87354	2.96216	3.44113	3.48953		expressed protein
LOC_Os02g51540	0.395794	0	30.1736	30.7835	31.0837	11.8094	12.6565	11.9633		eukaryotic aspartyl protease domain containing protein, expressed
LOC_Os03g58170	0.395886	0	11.7818	14.7689	11.0126	4.92265	4.90552	5.04266	SI2	stem-specific protein TSJT1, putative, expressed
LOC_Os09g39020	0.396081	0	8.35197	9.73115	8.2232	2.89304	3.51931	4.00708		N-rich protein, putative, expressed
LOC_Os07g46480	0.396278	0	116.093	95.2087	101.686	41.8266	39.97	42.2337		eukaryotic aspartyl protease domain containing protein, expressed
LOC_Os01g13300	0.396449	3.66204e-06	2.76153	2.56719	1.95373	0.763869	1.10602	1.01724		B3 DNA binding domain containing protein, expressed
LOC_Os04g49420	0.396586	0	68.7848	62.2083	68.3021	22.9242	21.64	34.4735		Core histone H2A/H2B/H3/H4 domain containing protein, putative, expressed
LOC_Os06g49840	0.396771	0	10.3147	7.59323	10.7286	4.10673	3.94712	3.3083	SPW1, spw1, MADS16, OsMADS16	SUPERWOMAN1
LOC_Os03g55350	0.3968	0	148.743	138.376	143.967	61.1864	52.0893	57.7795	OsSub31, SUB31	OsSub31 - Putative Subtilisin homologue, expressed
LOC_Os10g29514	0.397178	6.7356e-09	5.39624	5.94447	5.26567	2.6657	1.76426	2.16572		expressed protein
LOC_Os01g16870	0.397494	0	200.059	185.897	198.658	67.9541	78.2407	86.1856	OsAGO4a, AGO4-2	argonaute, putative, expressed
LOC_Os04g31524	0.397527	0	36.0067	34.2815	39.1467	12.9044	15.216	15.3829		expressed protein
LOC_Os07g36110	0.398642	0	26.9374	26.0069	27.3124	10.1122	10.4737	11.4077		expressed protein
LOC_Os03g21140	0.398649	0	47.1013	40.7809	43.4115	18.6131	17.7692	15.9578	OsC3H22	RNA-binding zinc finger protein, putative, expressed
LOC_Os05g37140	0.398672	0	90.0206	85.1827	86.419	36.3424	33.6865	34.2726	Fd, OsFd4, Fd4	2Fe-2S iron-sulfur cluster binding domain containing protein, expressed
LOC_Os04g24550	0.398785	0	76.3314	72.2336	74.3044	27.1947	29.8002	31.8821		ATP-binding region, ATPase-like domain containing protein, expressed
LOC_Os07g02130	0.399026	0.039696	1.68044	1.63807	2.07103	0.844436	0.853025	0.453107		flavin-containing monooxygenase family protein, putative, expressed
LOC_Os11g47330	0.399054	0	264.531	247.491	257.257	101.685	98.3702	106.928		ATP-grasp domain containing protein, expressed
LOC_Os05g47870	0.399337	0	5.34223	5.63646	4.94764	2.07775	2.21033	2.07189		expressed protein
LOC_Os06g11450	0.399585	0.000161322	2.01495	2.4431	2.16129	0.996956	0.818266	0.829774		zinc finger, C3HC4 type domain containing protein, expressed
LOC_Os03g21964	0.399813	0	16.6277	16.122	16.4362	6.12168	7.00848	6.53496		expressed protein
LOC_Os09g17770	0.399818	0	23.982	27.9914	26.7563	10.4867	10.4652	10.5257		retrotransposon protein, putative, unclassified, expressed
LOC_Os06g49050	0.400277	0	4.80955	4.99304	4.33068	1.91046	1.83689	1.90988		hAT dimerisation domain containing protein, expressed
LOC_Os08g41530	0.400525	0	4.15138	4.28332	4.9159	1.6487	1.69946	1.9991		ubiquitin carboxyl-terminal hydrolase family protein, expressed
LOC_Os01g51230	0.4007	0	21.3624	21.0399	22.3538	9.18199	7.77495	8.99087		IQ calmodulin-binding motif domain containing protein, expressed
LOC_Os09g37040	0.400822	0	17.087	17.3735	17.6211	6.53338	7.9748	6.36732		DUF630/DUF632 domains containing protein, putative, expressed
LOC_Os08g32500	0.401028	0	44.0532	37.4249	39.3431	14.912	16.9289	16.6119		nucleobase-ascorbate transporter, putative, expressed
LOC_Os02g31140	0.402642	0	17.6247	18.9147	19.07	8.16431	7.37921	6.84719	CFL1	curly flag leaf1
LOC_Os01g57340	0.402794	3.25964e-08	1.56982	1.6726	1.75346	0.633665	0.875253	0.503394	Pi sh, Pish, Pi-sh, Pish(t)	Magnaporthe grisea resistance-sh
LOC_Os02g27000	0.402844	0	81.9182	80.2197	83.1237	29.8105	32.294	36.6976		ATP-binding region, ATPase-like domain containing protein, expressed
LOC_Os12g25630	0.403058	0	95.9645	101.197	97.3766	40.6161	37.0155	41.0844		sulfite oxidase, putative, expressed
LOC_Os02g40410	0.403423	0	16.4588	15.3981	17.5143	6.29407	6.30554	7.31784		expressed protein
LOC_Os07g47140	0.404171	8.59864e-10	4.31179	5.4018	4.7735	2.08005	1.751	2.02422	OsBBX23, OsCCT27, OsR, OsCOL13, COL13	CCT/B-box zinc finger protein, putative, expressed
LOC_Os01g22000	0.404256	0.000277061	2.4476	2.61255	2.14234	1.05423	1.02946	0.827951		expressed protein
LOC_Os03g25750	0.404487	0	7.48732	8.10866	7.44994	2.81013	3.21721	3.29444		SNARE associated Golgi protein, putative, expressed
LOC_Os11g31500	0.404779	0	3.15922	2.95836	3.58585	1.46369	1.11462	1.34944		ATP binding protein, putative, expressed
LOC_Os08g35860	0.40506	0	28.1333	26.3525	28.7702	11.3719	11.8011	10.5507	OsCKX11	cytokinin dehydrogenase precursor, putative, expressed
LOC_Os12g38260	0.405254	1.98656e-05	1.63412	1.50344	1.37712	0.627406	0.540583	0.661604	OsSTA286	expressed protein
LOC_Os07g08340	0.405904	0	194.315	177.156	186.639	77.1244	73.1928	76.2216		pyruvate kinase, putative, expressed
LOC_Os01g11110	0.406279	0	21.1053	19.2781	21.4068	7.39434	8.75004	8.95968	GF14g, OsGF14g, 14-3-3g	14-3-3 protein, putative, expressed
LOC_Os01g73460	0.406489	1.88692e-09	4.51154	4.17629	3.74962	1.66698	1.88601	1.5027	OsSET6, SDG720	ATXR, putative, expressed
LOC_Os05g03620	0.407391	0	16.5318	14.0514	16.375	7.60302	5.75503	5.77231	OsCRR3, CCR3	TKL_IRAK_CR4L.4 - The CR4L subfamily has homology with Crinkly4, expressed
LOC_Os05g38980	0.407584	0	26.6372	23.1669	23.0454	8.26532	10.8247	10.6023	rbohD, OsrbohD, Os rbohD, OsRbohD, OsNox4	Rice respiratory burst oxidase homolog
LOC_Os11g32030	0.408218	4.43581e-11	12.378	12.5391	14.061	5.58104	7.10105	3.22951		sex determination protein tasselseed-2, putative, expressed
LOC_Os01g53450	0.408308	0	13.2754	11.6632	11.7978	4.75685	4.98626	5.25664		aminotransferase, classes I and II, domain containing protein, expressed
LOC_Os06g11320	0.408871	0	57.3225	43.3121	46.3151	17.3539	20.7503	21.9793	OsCYP40a, OsCYP-13, OsCYP40-1a, OsCYP40-1b	peptidyl-prolyl cis-trans isomerase CYP40, putative, expressed
LOC_Os06g19630	0.408901	0	15.743	17.0864	15.4549	5.8255	6.66154	7.2565		steroid nuclear receptor, ligand-binding, putative, expressed
LOC_Os05g02980	0.408972	0	12.6855	14.5088	14.3544	4.99077	5.86652	6.13494		expressed protein
LOC_Os01g01920	0.409374	0	5.93468	6.27266	5.65512	2.36144	2.60679	2.3442		HD domain containing protein 2, putative, expressed
LOC_Os06g44050	0.409449	0	11.1439	10.0423	10.5245	4.41296	4.61157	3.95938	Sdt97	methyladenine glycosylase, putative, expressed
LOC_Os03g53900	0.409701	2.99929e-09	11.5605	25.2451	16.4979	8.29896	7.07119	6.46836		universal stress protein domain containing protein, putative, expressed
LOC_Os05g36186	0.410323	5.20888e-05	5.62947	5.31869	5.48938	2.68379	1.83182	2.2291		expressed protein
LOC_Os01g41890	0.410468	0.000172373	1.29151	1.4191	1.42451	0.591732	0.636316	0.469284		MLA1, putative, expressed
LOC_Os02g47310	0.410837	0	82.8467	62.1612	66.0543	28.3439	27.1056	31.2626	OsVTE4, OsgammaTMT, gammaTMT	Cyclopropane-fatty-acyl-phospholipid synthase, putative, expressed
LOC_Os04g33760	0.411812	0.0133277	2.63946	3.50358	2.39616	1.61649	0.753662	1.14639	OsS40-6	DUF584 domain containing protein, putative, expressed
LOC_Os01g65650	0.412119	0	10.081	10.6827	11.1557	4.34998	4.63062	4.174		receptor-like protein kinase HAIKU2 precursor, putative, expressed
LOC_Os01g53200	0.41225	3.02816e-07	2.63838	3.38268	2.87513	1.28394	1.297	1.08651	OsYUCCA3, OsYUC3	YUCCA-LIKE GENE 3
LOC_Os05g40330	0.412584	0.00410298	2.48549	1.8832	1.60264	0.648822	0.917589	0.897263	OsPILS6b, PILS6b	auxin efflux carrier component, putative, expressed
LOC_Os08g29600	0.412968	2.19515e-06	9.09609	15.1031	11.8509	5.18032	5.23301	4.4742		seed maturation protein PM41, putative, expressed
LOC_Os11g06880	0.413103	0	76.8716	67.1788	70.8378	28.857	29.0764	30.8375		acyl-CoA synthetase, putative, expressed
LOC_Os01g49024	0.413505	0.00238739	2.62305	2.7364	2.82421	1.16602	1.07545	1.14251		shortened uppermost internode;phosphatidyl serine synthase
LOC_Os01g45460	0.413515	0	26.4218	24.8025	24.6576	9.69682	12.2066	9.47477		serine esterase, putative, expressed
LOC_Os07g42250	0.413824	0	13.7938	15.0054	13.0838	5.33474	6.01222	5.98525	OsSTRL12, STRL12	strictosidine synthase, putative, expressed
LOC_Os10g36420	0.414064	0	17.0371	14.9592	17.0102	7.21627	6.42698	6.6486	OsYAB3, OsYAB4, TOB3	YABBY gene
LOC_Os01g67730	0.414167	0	18.6562	23.8355	19.9835	7.99817	8.60933	9.26767		1-5-phosphoribosyl-5-5-phosphoribosylaminomethylideneaminoimidazole-4-carboxamide isomerase, chloroplast precursor, putative, expressed
LOC_Os11g33100	0.4144	0	23.921	22.4507	21.3407	9.08974	9.31091	9.65942		SNARE associated Golgi protein, putative, expressed
LOC_Os10g28030	0.414809	0	4.97599	4.86808	5.4254	2.1691	2.2926	1.87222	OsPOP22, POP22	OsPOP22 - Putative Prolyl Oligopeptidase homologue, expressed
LOC_Os08g18974	0.414859	2.02464e-06	2.91744	4.44865	4.59142	1.94475	1.29961	1.71632	OsEnS-119	expressed protein
LOC_Os04g19960	0.415127	2.38851e-11	16.5538	17.3639	14.7585	6.13559	5.00608	9.06515		retrotransposon protein, putative, unclassified, expressed
LOC_Os09g07830	0.415586	0	277.938	246.178	261.372	102.046	108.794	115.598		acetyl-CoA acetyltransferase, cytosolic, putative, expressed
LOC_Os09g29130	0.416624	0	9.15016	11.1021	12.3225	4.84165	4.73709	3.9927	OsZHD1	Zn-finger transcription factor
LOC_Os05g35730	0.416842	8.81293e-08	3.67502	2.79262	3.17635	1.17519	1.52633	1.3185		hydrolase, alpha/beta fold family domain containing protein, expressed
LOC_Os01g19480	0.417041	0	33.4338	29.0781	32.1853	13.1202	12.4753	13.8971		kelch motif family protein, putative, expressed
LOC_Os08g27250	0.417369	6.82432e-12	7.16217	7.72166	8.47385	3.64705	3.05396	3.04776		expressed protein
LOC_Os02g55320	0.417539	0	11.4402	10.5017	12.0129	4.60592	5.41666	4.15484	OsRR23, Rrb5, Orr3, OsRR18, OsRRB5	B-type response regulator gene
LOC_Os02g45570	0.418591	0	79.5393	83.6013	83.6026	38.1184	30.2692	34.8969	OsGRF10	growth regulating factor
LOC_Os03g04710	0.418878	0	99.6492	91.9716	92.4619	41.3254	36.4396	41.2308		expressed protein
LOC_Os10g35604	0.418986	9.93519e-06	2.66998	3.49008	2.88846	1.26086	1.40432	1.12601		expressed protein
LOC_Os11g19100	0.419095	0	10.0204	11.5767	10.8578	4.01962	4.97739	4.60465		retrotransposon protein, putative, unclassified, expressed
LOC_Os03g04920	0.419183	0	95.1748	94.9659	94.4439	37.8068	40.5887	40.8976	OsABCC13, OsMRP13, OsMRP5	multidrug resistance-associated protein, putative, expressed
LOC_Os02g43300	0.420044	0	6.50464	8.9334	8.02072	3.75597	2.76158	3.33615		expressed protein
LOC_Os11g40590	0.420452	0	34.406	31.3086	32.6193	13.2944	12.5076	15.5427		DUF1399 containing protein, putative, expressed
LOC_Os12g10630	0.420752	0.000647269	3.19061	2.81833	3.60134	1.53742	0.976211	1.52991	OsZHD3	ZF-HD protein dimerisation region containing protein, expressed
LOC_Os05g02510	0.421041	0	68.0746	77.5563	75.8259	30.2812	31.8821	31.079		beta-hexosaminidase precursor, putative, expressed
LOC_Os03g40260	0.421292	5.79621e-05	2.17759	4.18248	3.74872	1.56709	1.47385	1.21781		Regulator of chromosome condensation domain containing protein, expressed
LOC_Os03g03724	0.421531	0	44.737	67.8394	56.6444	28.0516	24.8247	18.4554		expressed protein
LOC_Os03g59240	0.421807	0	63.9176	68.5929	70.7073	27.3103	30.0936	28.3149		carboxyl-terminal peptidase, putative, expressed
LOC_Os04g45060	0.421882	0.0375768	2.4476	3.59718	3.31484	1.57685	1.33802	1.03378		MYB family transcription factor, putative, expressed
LOC_Os11g03550	0.421895	3.088e-09	4.18624	3.83529	4.26761	1.44165	1.72379	2.01929		expressed protein
LOC_Os07g42490	0.422241	0	96.163	104.652	106.003	43.3166	36.577	49.6575	RSus3(t), SUS3, SS3, OsScS3, RSs3, RSus3, OsSUS3, RSS3, OsEnS-111	rice sucrose synthase
LOC_Os04g46880	0.42255	2.47177e-08	4.42491	5.86256	3.42787	2.0012	1.94669	1.84752	FCO11	transporter, major facilitator family, putative, expressed
LOC_Os11g13880	0.422964	0	37.8512	41.4562	39.1574	16.0524	18.541	15.513		expressed protein
LOC_Os04g22270	0.423025	0	24.7641	27.4669	25.0418	11.8891	10.4211	10.3782		expressed protein
LOC_Os04g41160	0.423334	1.36486e-11	4.55102	5.16625	4.83671	2.21763	2.26819	1.67537	OsOxi1	AGC Kinase
LOC_Os02g50700	0.423766	0	64.1638	87.1516	65.0101	28.6942	27.04	35.9372		expressed protein
LOC_Os04g49130	0.424017	0	44.1515	40.8463	41.4098	17.9507	15.5001	20.1482	OsUBC3	ubiquitin-conjugating enzyme, putative, expressed
LOC_Os03g29760	0.424087	0	50.6311	49.9871	52.1325	21.481	21.3817	21.9168	OsHAP2E, NF-YA, CBF-B, NF-YA2, OsNF-YA2, NFYA2	heme activator protein gene; nuclear factor Y; CCAAT binding factor
LOC_Os04g57870	0.424246	0	17.9045	17.2774	19.9959	7.89226	7.41793	8.09873		expressed protein
LOC_Os01g53370	0.424362	4.39873e-05	2.28794	2.31286	2.50644	0.936803	1.03236	1.04688		anthocyanidin 5,3-O-glucosyltransferase, putative, expressed
LOC_Os05g29810	0.424989	0	383.396	434.051	423.826	193.481	162.857	171.19	OsERF#061, OsERF061, OsERF61, AP2/EREBP#093, AP2/EREBP93	AP2 domain containing protein, expressed
LOC_Os10g30280	0.425475	0	17.8002	19.1117	21.2327	6.73349	8.25092	9.75466	OsFbox554, Os_F0677	OsFBX386 - F-box domain containing protein, expressed
LOC_Os02g20970	0.426166	0	11.8074	15.7758	13.1973	5.66538	5.41365	6.30019	OsNTMC2T6.2	C2 domain containing protein, putative, expressed
LOC_Os10g11100	0.426205	0	106.208	93.7654	100.376	42.2572	42.4208	43.3324		retrotransposon protein, putative, unclassified, expressed
LOC_Os02g05692	0.426235	0	17.3428	19.9988	20.0805	7.76351	9.20082	7.51096	OsRFP	zinc finger, C3HC4 type domain containing protein, expressed
LOC_Os09g38772	0.426877	0	45.3679	44.7801	41.8771	17.8341	18.7255	19.7988		MOSC domain-containing protein, mitochondrial precursor, putative, expressed
LOC_Os02g48460	0.426927	0	14.2865	12.6149	14.5054	6.32356	5.48606	5.86805		NAD dependent epimerase/dehydratase family protein, putative, expressed
LOC_Os04g33820	0.426969	7.74564e-07	5.28711	7.71804	6.68389	3.52791	2.06788	2.81083	OsFbox208, Os_F0775	OsFBX132 - F-box domain containing protein, expressed
LOC_Os04g52770	0.427069	0	74.3459	65.1069	67.7618	29.5887	30.4331	28.4731	OsbHLH101	helix-loop-helix DNA-binding domain containing protein, expressed
LOC_Os06g12960	0.42771	0	12.2688	10.7441	8.98341	4.71848	4.40674	4.55992		expressed protein
LOC_Os02g27110	0.427996	0	17.219	18.6201	19.5242	7.34309	8.22079	8.13137		expressed protein
LOC_Os04g55120	0.428577	0	25.8668	27.2428	28.0511	11.5541	13.1305	10.099		jp18, putative, expressed
LOC_Os12g03810	0.429524	0	28.5045	29.9519	29.2154	12.4506	13.2797	11.9268	OsCIPK32	CAMK_KIN1/SNF1/Nim1_like.37 - CAMK includes calcium/calmodulin depedent protein kinases, expressed
LOC_Os08g42600	0.429707	0	49.1466	45.2551	51.3073	19.4342	20.2974	22.8805	Orysa;Rb2, RBR2, OsRBR1	retinoblastoma-related protein-like, putative, expressed
LOC_Os03g07180	0.429866	0	102.273	183.278	120.453	68.6873	54.1837	51.6563	OsLEA16	embryonic protein DC-8, putative, expressed
LOC_Os08g25070	0.430447	3.23466e-05	11.1271	8.18311	7.31381	4.88735	3.26348	3.30938		PME/invertase inhibitor, putative, expressed
LOC_Os01g39600	0.4306	0	20.2399	20.6997	22.1909	9.19942	8.72536	9.25923		expressed protein
LOC_Os01g12900	0.431127	0	48.3644	50.1642	45.9854	20.558	21.4927	20.2533	OsRAC1, OsRac1, Os Rac1, Rac1, Os-Rac1	Small GTPase; small GTP-binding protein
LOC_Os02g42810	0.43175	6.96592e-08	7.74216	9.71512	8.22483	4.65982	3.99669	2.43174		oxidoreductase, short chain dehydrogenase/reductase family domain containing protein, expressed
LOC_Os03g40930	0.432089	0	19.2696	18.2296	18.7856	8.13384	7.79736	8.38882		expressed protein
LOC_Os11g29400	0.432368	0	173.317	148.22	169.981	71.2	68.9941	72.3232	Os6PGDH2	6-phosphogluconate dehydrogenase, decarboxylating, putative, expressed
LOC_Os01g11810	0.432918	4.09459e-11	5.40073	5.95051	5.7052	3.00128	2.32223	2.06053	OsTBL19, TBL19	powdery mildew resistant protein 5, putative, expressed
LOC_Os06g48620	0.433661	0	22.2295	18.9453	19.8541	8.6753	9.21526	8.5753		4-amino-4-deoxychorismate synthase, putative, expressed
LOC_Os03g17040	0.4339	0.0215358	3.41673	3.99671	4.2109	1.71694	1.65181	1.67504		expressed protein
LOC_Os05g04530	0.434274	0	25.2326	20.0059	22.0968	9.21893	9.19665	10.8264		IF, putative, expressed
LOC_Os11g42450	0.434675	2.0879e-08	4.56127	4.7484	4.81841	2.11577	2.01855	2.00681		leucine-rich repeat family protein, putative, expressed
LOC_Os01g07360	0.435011	0	18.4634	20.2977	18.8518	7.60423	8.5102	8.94784		KIP1, putative, expressed
LOC_Os06g04540	0.435017	0	32.6804	34.4852	31.761	14.7906	13.6139	14.6302	dp1, pa	depressed palea1
LOC_Os04g56180	0.436278	0	106.689	101.423	109.246	51.0942	48.0034	39.3589	prx58	peroxidase precursor, putative, expressed
LOC_Os03g42070	0.436435	0	7.35743	8.45859	8.23744	3.90547	3.47177	3.12053	CycD5;2, CycD5;os;2, Orysa;CycD5;2, Orysa;CYCD5;2	rice cyclin gene
LOC_Os06g08560	0.436519	0	9.25475	8.53894	8.36333	3.53226	3.704	4.18179	OsABCC12, OsMRP12	multidrug resistance-associated protein 11, putative, expressed
LOC_Os07g06490	0.436599	7.72921e-06	2.68342	3.82764	2.92516	1.49189	1.21725	1.41071		DNA binding protein, putative, expressed
LOC_Os02g45054	0.436611	0	21.347	19.8214	20.5895	8.87943	8.91539	9.16941	OsIDD4, IDD4, SID1	ZOS2-15 - C2H2 zinc finger protein, expressed
LOC_Os01g66350	0.436619	0	114.058	107.118	117.36	48.6512	46.9821	52.178	OsRUS6A	DUF647 domain containing protein, putative, expressed
LOC_Os04g40630	0.436821	9.97809e-05	2.59468	3.63061	3.01852	1.25434	1.63389	1.14966		BTBZ4 - Bric-a-Brac, Tramtrack, Broad Complex BTB domain with TAZ zinc finger and Calmodulin-binding domains, expressed
LOC_Os07g36190	0.436835	0	172.022	175.769	175.97	77.4734	77.4648	73.8593	IPI, ipi	hydrolase, NUDIX family, domain containing protein, expressed
LOC_Os07g47250	0.436957	0	5.48814	6.50928	5.82242	2.55663	2.29567	2.9342		lipase; Lipolytic enzyme
LOC_Os04g42784	0.437011	0	18.9333	14.4011	16.2353	6.58448	7.51585	7.56213		DNA mismatch repair protein, putative, expressed
LOC_Os03g06440	0.437698	0	9.13757	8.16379	8.95794	3.17834	3.89258	4.42273		RNA helicase SDE3, putative, expressed
LOC_Os07g39460	0.438391	0.000448531	1.29897	1.38344	1.66889	0.670388	0.695028	0.542157		transposon protein, putative, unclassified, expressed
LOC_Os03g07880	0.438455	0	61.4388	73.457	66.8306	26.8919	29.524	32.032	OsHAP2C, NF-YA, CBF-B, NF-YA1, OsNF-YA1, NFYA1	nuclear transcription factor Y subunit, putative, expressed
LOC_Os01g07980	0.438508	1.70608e-11	11.9111	10.8972	11.3172	4.28007	5.06673	5.61754		ankyrin, putative, expressed
LOC_Os07g46560	0.438958	0	17.5656	15.6684	16.9164	7.33803	7.37685	7.29904		seven in absentia protein family domain containing protein, expressed
LOC_Os05g39950	0.438973	0.00657446	3.02592	1.80665	2.09771	0.982024	1.18401	0.876163	OsOFP15, OsOFP22	DUF623 domain containing protein, expressed
LOC_Os09g23300	0.439046	0	102.932	78.9805	86.4949	38.5461	40.518	38.7791	OsVIT2, OsVIT1	Vacuolar membrane transporter
LOC_Os11g16390	0.439077	0	18.7256	17.6594	17.2931	6.36198	9.35607	7.85081		expressed protein
LOC_Os12g01770	0.439808	0	17.1586	15.8294	16.9909	7.23168	7.1069	7.64262	OsPP123	protein phosphatase 2c, putative, expressed
LOC_Os02g19970	0.440192	0	21.5523	21.9625	22.7673	9.79953	10.4759	8.9014	OsNAAT2	nicotianamine aminotransferase gene
LOC_Os04g51090	0.44088	0.0104094	0.671841	0.415454	0.524894	0.218038	0.31262	0.180124		tRNA-splicing endonuclease positive effector-related, putative, expressed
LOC_Os01g56020	0.441106	0	20.5872	18.5847	19.1811	8.48113	8.32513	8.93357		expressed protein
LOC_Os01g46290	0.441712	0	36.3357	31.9874	33.9149	15.4987	13.8898	15.7712		lipase, putative, expressed
LOC_Os11g35060	0.441906	0	15.8417	16.4316	15.8134	5.87569	7.82619	7.54794		agenet domain containing protein, expressed
LOC_Os06g07000	0.441973	3.41216e-12	3.95741	3.79604	4.11485	1.6867	1.76696	1.79181	OsFbox298, Os_F0486	OsFBL28 - F-box domain and LRR containing protein, expressed
LOC_Os06g11610	0.442112	2.69561e-10	17.3181	13.6868	10.2819	6.65355	6.45416	5.14567		heat shock 22 kDa protein, mitochondrial precursor, putative, expressed
LOC_Os05g39250	0.442165	0.00238349	24.6568	68.0332	26.9098	19.2572	17.4926	16.133		phosphatidylethanolamine-binding protein, putative, expressed
LOC_Os02g44380	0.443118	0	6.23251	5.65503	7.62779	2.37008	3.30626	2.97124	OsWD40-48, OsSTA70	WD domain containing protein, putative, expressed
LOC_Os01g68940	0.443295	1.65524e-08	30.7229	38.2245	26.819	14.9763	12.5138	14.9626		ubiquitin family domain containing protein, expressed
LOC_Os08g30820	0.443336	1.29544e-06	5.16333	5.13802	4.35596	2.01804	1.67454	2.80554		cleavage and polyadenylation specificity factor subunit 5, putative, expressed
LOC_Os05g32610	0.443567	0	8.47472	7.11229	8.95248	3.46825	3.65844	3.75823		required to maintain repression 1, putative, expressed
LOC_Os04g49590	0.443653	5.96079e-06	3.37831	3.68401	4.10241	1.17406	1.69887	2.08032		regulatory protein, putative, expressed
LOC_Os02g35220	0.443883	0	11.3407	12.5562	11.5193	5.64402	5.92285	4.15379		expressed protein
LOC_Os05g33570	0.443925	0	191.296	175.069	159.72	69.1829	78.8651	85.4947	flo4, flo4-2, flo4-3, ppdk, OsPPDK, PPDK1, CPDK1, PPDKB, OsPPDKB, cyOsPPDKB, OsPBDK, PBDK, osppdkb, PPD	White-core floury endosperm-4
LOC_Os03g24160	0.444089	0.00352223	1.538	1.19073	1.37475	0.713408	0.540498	0.5684		phosphatidylinositol-4-phosphate 5-kinase, putative, expressed
LOC_Os07g36610	0.444334	0	7.47029	9.59306	8.56125	3.48505	3.92284	3.97801	OsCslF9, OsCSLF9	CSLF9 - cellulose synthase-like family F%3B beta1,3%3B1,4 glucan synthase, expressed
LOC_Os08g42730	0.444558	0	66.956	55.467	58.4551	25.9899	27.2655	27.1553		radical SAM enzyme, putative, expressed
LOC_Os05g37390	0.44462	0	65.958	61.242	63.4447	25.7477	27.4356	31.5811		G10 protein, putative, expressed
LOC_Os04g38026	0.444718	5.45946e-11	3.59156	2.97389	3.34642	1.50061	1.53636	1.37102		transporter family protein, putative, expressed
LOC_Os02g57250	0.445223	0	37.0542	42.0417	40.8331	17.3382	18.9192	17.1377	OsIAA10, OsIAA5	OsIAA10 - Auxin-responsive Aux/IAA gene family member, expressed
LOC_Os12g40440	0.445602	0	16.7092	15.6096	16.0666	7.14021	7.17053	7.24993	OsALDH12B1	Rice Aldehyde Dehydrogenase
LOC_Os01g01600	0.445699	5.30655e-06	3.6426	3.96556	3.11334	1.49763	1.84906	1.43187	OsbHLH071, bHLH071, bHLH71	ethylene-responsive protein related, putative, expressed
LOC_Os03g56950	0.44571	1.02365e-11	4.40058	4.7437	4.52503	1.88199	2.1863	2.02426	OsPIL1, OsPIL13, OsbHLH152	phytochrome-interacting bHLH factors-LIKE
LOC_Os11g20330	0.445732	0.00023108	5.017	6.33544	5.57515	2.88125	2.24906	2.41486		expressed protein
LOC_Os03g12910	0.445939	0	45.9002	43.2671	44.3022	18.4884	20.6878	20.3431		squalene monooxygenase, putative, expressed
LOC_Os02g35100	0.44602	0	21.362	22.3028	20.5991	8.19617	9.77898	10.6878		DDT domain containing protein, putative, expressed
LOC_Os12g22880	0.446026	0.000211569	12.1517	9.73011	8.73249	6.39713	4.36408	2.89357		expressed protein
LOC_Os01g53750	0.446567	0	115.671	108.89	117.059	48.5969	51.8185	52.1406		glucan endo-1,3-beta-glucosidase precursor, putative, expressed
LOC_Os10g21090	0.446615	0	4.45306	4.64854	4.56368	2.07071	1.95682	2.07558		ATP binding protein, putative, expressed
LOC_Os07g41080	0.447254	0	64.7001	61.5372	59.0724	25.262	29.9216	27.6968		hydrolase, alpha/beta fold family domain containing protein, expressed
LOC_Os10g38040	0.447946	3.95265e-08	9.16425	12.2034	9.48331	5.63893	3.60765	4.57298	OsEMSA1	lysM domain containing protein, putative, expressed
LOC_Os07g44780	0.448077	8.75745e-06	4.16581	6.2997	5.86754	2.97973	1.94319	2.39554	OsGELP93	GDSL-like lipase/acylhydrolase, putative, expressed
LOC_Os04g51390	0.448375	0	7.153	6.6007	6.93152	2.91519	3.40229	2.95726		aldose 1-epimerase, putative, expressed
LOC_Os01g12460	0.448399	5.4571e-07	6.54189	6.46087	6.12263	2.88365	2.7382	2.95395		expressed protein
LOC_Os04g30760	0.448458	0	230.641	205.185	217.933	95.6025	95.6695	101.912		3-oxoacyl-reductase, chloroplast precursor, putative, expressed
LOC_Os12g10330	0.448544	0.000682892	1.91199	2.52672	2.09647	0.705391	1.17942	1.04651		NB-ARC domain containing protein, expressed
LOC_Os04g44210	0.449044	6.82432e-12	5.31529	6.21124	5.50127	2.0546	2.53429	3.05734		expressed protein
LOC_Os01g72250	0.449301	0	20.8389	17.2184	18.6751	8.5693	9.05753	7.86311	UMPS2	uridine 5-monophosphate synthase, putative, expressed
LOC_Os12g44370	0.449344	2.525e-09	6.81911	5.42432	6.34224	3.31493	2.70902	2.32742		expressed protein
LOC_Os03g03590	0.449348	0	17.8427	20.1093	18.8486	7.49527	9.60687	8.42104		transporter, monovalent cation%3Aproton antiporter-2 family, putative, expressed
LOC_Os02g46220	0.449649	0	19.6523	14.9874	16.0235	8.09755	7.36192	7.32121		expressed protein
LOC_Os03g26490	0.449888	2.16557e-06	12.6694	25.424	15.7571	8.84411	7.28665	8.09593	OsEnS-46	expressed protein
LOC_Os08g32980	0.450572	0	36.7068	44.6886	40.0368	19.2727	19.4269	16.0143		expressed protein
LOC_Os03g52320	0.45116	0	45.671	38.4875	45.816	18.1986	21.4601	18.9806	OsGIF3, GIF3, OsGIF1, GIF1	GRF-interacting factor 1, putative, expressed
LOC_Os02g03330	0.451606	0	145.83	138.683	132.426	68.8115	62.8024	56.6777	OsLIL3, LIL3	expressed protein
LOC_Os04g34540	0.451975	5.48334e-09	9.71218	9.02026	9.83221	4.97084	4.88446	3.05522		expressed protein
LOC_Os02g51040	0.452055	0	96.4123	110.698	83.9909	54.0789	39.9137	37.6009	OsEXPA5, OsEXP5, osaEXPa1.20	expansin precursor, putative, expressed
LOC_Os03g07380	0.452404	0	44.0661	37.4006	39.671	18.7621	16.896	19.145		expressed protein
LOC_Os10g19190	0.452931	1.40182e-06	5.98273	6.64837	6.44039	2.46237	3.00804	3.16767		vesicle transport protein GOT1B, putative, expressed
LOC_Os12g13340	0.453313	0	23.7921	21.0913	23.3614	10.3163	9.6244	10.9956		expressed protein
LOC_Os01g11880	0.453327	0	20.7909	25.3653	21.3017	9.04502	9.79912	11.7363	OsDJ-1B, DJ-1B	DJ-1 family protein, putative, expressed
LOC_Os02g11040	0.453564	0	114.995	129.785	120.461	57.6188	63.8788	44.1628		expressed protein
LOC_Os04g51610	0.453897	0	52.1383	55.7236	54.2562	20.7867	25.2609	27.5374	osACA11, OsACA6, OsACA5, OsPM4ATP8	calcium-transporting ATPase, plasma membrane-type, putative, expressed
LOC_Os08g35090	0.453932	0	26.8748	27.5481	29.2155	12.7495	12.9402	12.2763		OsSub56 - Putative Subtilisin homologue, expressed
LOC_Os08g41560	0.454064	4.91351e-10	2.83117	3.2343	3.22232	1.21158	1.5577	1.44797		ubiquitin carboxyl-terminal hydrolase, putative, expressed
LOC_Os09g19830	0.454095	0	14.3519	13.7603	13.846	5.38691	7.06231	6.60379	OsSET35, SDG727, OsSUVH6	Histone H3K9 Methyltransferase Gene
LOC_Os06g48065	0.454273	0	12.8427	13.2333	13.5667	5.70113	5.99299	6.31445		Zinc finger, C3HC4 type domain containing protein, expressed
LOC_Os02g36600	0.454687	0	66.793	54.7403	56.8736	26.3974	24.0918	30.6301		aldose 1-epimerase, putative, expressed
LOC_Os07g37610	0.455121	0	69.6378	74.9247	70.5613	31.0642	33.4016	33.4416		germination defective1;B3 domain transcriptional repressor
LOC_Os08g17320	0.455433	0	6.10338	5.16907	5.48666	2.6701	2.81876	2.1438		protein kinase family protein, putative, expressed
LOC_Os04g43760	0.455679	0	34.1781	32.7479	34.2414	15.8895	14.887	15.3234	OsPAL02, PAL02, OsPAL5, OsPAL2. PAL2	phenylalanine ammonia-lyase gene
LOC_Os05g02580	0.456081	0	16.2053	15.0465	18.3429	7.03956	7.6028	7.97682		expressed protein
LOC_Os05g19150	0.45618	9.15653e-07	4.74565	5.65943	4.9212	2.36285	2.34269	2.28599		hydrolase, alpha/beta fold family domain containing protein, expressed
LOC_Os04g31610	0.45662	5.39121e-10	8.12653	6.50295	7.88228	3.82379	3.37516	3.08037	Os_F0796	OsFBO3 - F-box and other domain containing protein, expressed
LOC_Os12g34350	0.456677	0	30.1924	27.9596	29.8258	12.8052	13.4891	13.883		expressed protein
LOC_Os11g39940	0.456988	5.08412e-10	30.6317	35.5724	36.4069	10.3592	21.9756	14.5572		transposon protein, putative, unclassified, expressed
LOC_Os12g39100	0.457072	0.00236688	2.93371	2.36883	2.16937	1.04833	1.12518	1.24169		expressed protein
LOC_Os12g40450	0.457202	1.41263e-09	7.11733	7.77044	9.41611	3.06559	3.47527	4.57093		biotin--protein ligase, putative, expressed
LOC_Os07g23900	0.457889	1.67196e-10	4.2221	4.51915	4.48927	1.94138	2.21327	1.90347	OsFBX234, OsFbox369, Os_F0191	OsFBX234 - F-box domain containing protein, expressed
LOC_Os02g26470	0.458428	3.96391e-08	54.5355	92.3602	52.472	38.2728	25.5296	27.5933		expressed protein
LOC_Os05g50120	0.458569	0	11.549	10.893	12.2821	5.56924	4.94237	5.41177	OsMPK17, OsMPK21-1	mitogen-activated protein kinase
LOC_Os03g61340	0.45928	0	15.7518	13.8323	13.7089	6.34133	6.72385	6.81842		hydrolase, alpha/beta fold family domain containing protein, expressed
LOC_Os06g44840	0.45937	0	94.4992	97.5318	103.869	45.9928	43.6672	46.2676	OsVTE2, VTE2, SGD1	prenyltransferase, putative, expressed
LOC_Os01g46570	0.45956	1.27585e-06	18.4582	19.2653	18.0612	7.64766	13.1936	4.79518		CTP synthase, putative, expressed
LOC_Os08g16720	0.45977	0.00708877	4.29308	4.67757	5.12027	2.01813	2.17925	2.28119		retrotransposon protein, putative, unclassified, expressed
LOC_Os05g50160	0.45997	0	18.3988	13.1634	16.3417	8.04961	7.38803	6.59668		DUF617 domain containing protein, expressed
LOC_Os08g30780	0.459994	2.75658e-07	3.81369	3.43734	3.50757	1.27761	1.46397	2.20731	OsABCA5	ABC transporter, ATP-binding protein, putative, expressed
LOC_Os11g13940	0.460353	2.32778e-08	2.1971	2.54864	2.37254	1.04682	1.07399	1.15611		NBS-LRR disease resistance protein, putative, expressed
LOC_Os08g18920	0.460419	0	7.89509	5.48408	7.62798	3.15606	2.93599	3.58005		protein kinase domain containing protein, expressed
LOC_Os10g33790	0.46076	0	19.7538	18.8348	19.3599	9.3226	9.72244	7.65537		expressed protein
LOC_Os11g39540	0.46137	0.0107224	5.68633	7.48301	6.52177	2.36759	4.0411	2.6762	GF14h, OsGF14h, 14-3-3h	14-3-3 protein, putative, expressed
LOC_Os01g61230	0.461406	0	19.0992	21.5547	21.1871	10.0327	9.20922	9.29182		dihydroflavonol-4-reductase, putative, expressed
LOC_Os04g52110	0.461739	9.89526e-11	91.3609	145.604	101.218	61.6871	40.124	54.341	OsLEA18	late embryogenesis abundant protein, group 3, putative, expressed
LOC_Os01g42460	0.461948	0	13.0283	12.9695	12.5508	5.45786	6.54875	5.8009		BAH domain containing protein, expressed
LOC_Os11g35050	0.46213	0	44.1542	41.0899	45.7803	17.7961	21.1598	21.5943		expressed protein
LOC_Os06g41050	0.462245	4.07937e-07	3.32339	2.96016	3.02835	1.5808	1.33932	1.38427	OsCOM1, COM1	COM1/SAE2 homolog
LOC_Os05g40890	0.462327	4.00042e-08	13.2851	11.052	11.7911	6.64539	4.2495	5.80815		expressed protein
LOC_Os03g18370	0.462584	8.2233e-10	4.90974	4.02592	4.86237	1.99058	2.18075	2.21142		MRH1, putative, expressed
LOC_Os01g70260	0.462994	0	7.71671	8.09924	7.50873	3.67051	3.38889	3.73978		receptor-like protein kinase 2 precursor, putative, expressed
LOC_Os05g37340	0.463035	0	13.5481	14.4754	15.5008	6.08243	6.81262	7.25823		expressed protein
LOC_Os12g40380	0.463111	3.57253e-09	14.8825	17.054	16.8323	8.86052	6.97986	6.74494		expressed protein
LOC_Os03g07940	0.463182	0	25.0484	18.5834	20.3208	10.4935	8.53766	10.5905	OsPLT10, AP2/EREBP26, AP2/EREBP#026	AP2 domain containing protein, expressed
LOC_Os03g14720	0.463465	1.63784e-10	3.42985	3.06555	3.38506	1.58598	1.70019	1.29308		transcription initiation factor IIF, alpha subunit domain containing protein, expressed
LOC_Os01g03100	0.463631	1.70671e-05	3.26972	2.93621	3.45405	1.73607	1.44056	1.30204		protein binding protein, putative, expressed
LOC_Os07g06970	0.463862	0	13.5317	12.2396	13.0756	6.02671	5.99926	5.99364	waf1, waf1-1, waf1-2, HEN1	wavy leaf1
LOC_Os11g04600	0.464327	1.64865e-07	3.63017	4.90789	4.32132	2.28705	1.81524	1.86867		BTBA5 - Bric-a-Brac,Tramtrack, Broad Complex BTB domain with Ankyrin repeat region, expressed
LOC_Os01g62870	0.464803	0	18.7418	16.9092	17.4152	8.02267	8.20998	8.43264	OsAKR2, AKR4C14	Aldo–keto reductase
LOC_Os10g31990	0.46522	0	4.13009	4.67543	5.23801	1.97432	2.42692	2.1321		retrotransposon protein, putative, unclassified, expressed
LOC_Os03g11560	0.465233	1.08722e-06	3.66682	3.93767	4.09579	1.44992	2.07495	1.91848		digalactosyldiacylglycerol synthase, chloroplast precursor, putative, expressed
LOC_Os07g09060	0.466067	0	212.701	170.205	172.788	85.3358	81.7552	91.8998	OsALDH6B2	Rice Aldehyde Dehydrogenase
LOC_Os11g35030	0.466404	0	23.3297	20.3859	21.794	9.63875	10.0312	10.8841	OsGRF8	growth regulating factor
LOC_Os06g17880	0.466486	0.000293626	1.72651	1.46368	1.56592	0.683554	0.637391	0.897716	Nbs1-Pi9, Nbs1-Pi2, Nbs1-NPB	NBS-LRR disease resistance protein, putative, expressed
LOC_Os11g43410	0.46652	0.000849588	1.7599	1.77879	2.16122	0.884365	1.02736	0.747388		Leucine Rich Repeat family protein, expressed
LOC_Os10g40110	0.466597	0	18.501	16.2405	17.8541	8.03838	8.23498	8.26762		GTP binding protein, putative, expressed
LOC_Os12g08030	0.466893	0	11.0579	9.5836	10.2552	4.50309	5.13208	4.79029		expressed protein
LOC_Os12g07710	0.467228	0	48.4354	47.9848	48.7524	26.4517	21.525	19.852		expressed protein
LOC_Os04g36850	0.467743	0	28.4821	26.5983	24.4302	11.6824	12.8516	12.6565		ORG4, putative, expressed
LOC_Os12g09580	0.468098	0	92.663	89.7443	89.2978	37.5366	44.2075	45.4405	OsSGS3	leafbladeless1, putative, expressed
LOC_Os08g17870	0.468643	0	26.5601	24.4969	28.4193	11.7515	12.8217	12.6729		reticulon domain containing protein, putative, expressed
LOC_Os06g43960	0.468653	7.16553e-11	9.81382	11.9948	9.49366	4.47993	4.37952	5.81046		expressed protein
LOC_Os11g02270	0.468877	0.00527712	2.6431	2.21342	2.57454	1.41443	1.08033	0.989502		expressed protein
LOC_Os01g08190	0.468916	0	18.1422	17.6613	19.0372	8.27927	8.58177	8.85466	OsWD40-4	transcriptional corepressor LEUNIG, putative, expressed
LOC_Os01g10430	0.469343	0	36.6123	30.3919	34.2152	14.6464	16.5563	16.3039	Orysa;CKL4	protein kinase family protein, putative, expressed
LOC_Os01g45640	0.469598	0	206.025	183.591	167.557	86.5127	80.5905	94.5449		tat pathway signal sequence family protein, expressed
LOC_Os01g66720	0.469781	0	24.832	26.9193	26.4199	12.2099	12.8763	11.6371		NADP-dependent oxidoreductase, putative, expressed
LOC_Os01g67720	0.46987	0	19.1537	13.1333	16.8818	7.4561	7.76879	7.87806		Activity of bc1 complex
LOC_Os05g30210	0.470399	0	5.55051	5.08684	5.81435	2.80085	2.49925	2.43877		expressed protein
LOC_Os10g07229	0.47052	1.52865e-09	6.06715	6.64243	7.58898	3.0033	2.88062	3.66696		dehydrogenase, putative, expressed
LOC_Os02g16630	0.470678	0	9.12887	9.3736	8.53079	4.58734	4.0399	4.09672		tryptophan biosynthesis protein trpCF, putative, expressed
LOC_Os05g49250	0.470786	9.99763e-10	2.50444	2.70846	2.81201	1.34557	1.15137	1.28108	AlkA	hhH-GPD superfamily base excision DNA repair protein, putative, expressed
LOC_Os04g59540	0.471017	1.20504e-07	2.20057	3.74118	3.09949	1.39944	1.47678	1.38236		phosphatidylinositol-4-phosphate 5-Kinase, putative, expressed
LOC_Os01g45990	0.471111	9.62509e-06	4.22786	2.42465	2.85003	1.6368	1.58665	1.2533	OsAKT1, Os-AKT1, AKT1	Shaker K+ channel
LOC_Os01g07370	0.471331	0	43.9402	45.9522	54.8389	20.7801	21.1098	26.3264		KIP1, putative, expressed
LOC_Os03g01240	0.471691	0	3.40586	2.68293	3.06101	1.41578	1.33966	1.56044		CCR4-Not complex component, Not1domain containing protein, expressed
LOC_Os02g43010	0.471909	0	220.404	256.024	244.035	99.9577	121.357	118.678	OsVPE3, REP-2, REP-2alpha, REP-2beta, OsaLeg2	vacuolar processing enzyme
LOC_Os08g43410	0.471953	0	11.1858	9.91499	10.5807	5.7312	5.30704	3.91395		LRP1, putative, expressed
LOC_Os03g01160	0.472035	2.34484e-08	3.07232	3.06791	2.65183	1.44973	1.35036	1.35007	OsPUB50, OsRLCK93	protein kinase family protein, putative, expressed
LOC_Os11g09140	0.472122	0	15.989	16.9541	18.5858	7.42595	8.54677	8.35522		DUF803 domain containing, putative, expressed
LOC_Os10g39750	0.472607	0	11.0688	13.2758	12.1347	6.04	5.52219	5.67818	OsbHLH004	inducer of CBF expression 2, putative, expressed
LOC_Os06g45100	0.472645	0.00172276	3.30801	2.93639	2.876	1.2357	2.08044	0.994574		FAD binding domain of DNA photolyase domain containing protein, expressed
LOC_Os08g37130	0.472809	2.44996e-05	5.98714	9.70931	8.4192	4.18078	4.49959	2.72172	EIP11	oxidoreductase, short chain dehydrogenase/reductase family domain containing protein, expressed
LOC_Os03g18520	0.472887	0	14.6283	14.2274	13.5488	6.68893	6.44024	6.92338		glucan endo-1,3-beta-glucosidase 9 precursor, putative, expressed
LOC_Os03g57660	0.473896	0	35.69	31.7027	32.2172	13.6509	15.5267	18.0272	go, go1, pla3, PLA3, PLA3/GO, OsLBD3-7, LBD3-7	peptidase, putative, expressed
LOC_Os01g62860	0.474455	0	24.1496	25.0101	25.2094	12.5044	10.6851	12.0953	OsARK1	Aldo–keto reductase
LOC_Os08g05780	0.47459	0	33.5679	39.6005	32.6235	18.2427	16.9641	15.0011		expressed protein
LOC_Os12g30520	0.474674	3.44628e-10	6.13091	4.31041	5.17295	2.44105	2.16759	2.80305	OsPuf4	pumilio-family RNA binding repeat containing protein, expressed
LOC_Os03g57240	0.47486	0	12.8391	10.1086	11.998	5.6719	5.72959	5.19285	OsDST	zinc finger protein
LOC_Os04g52230	0.475659	9.55405e-11	4.27262	5.39749	4.31018	2.41783	1.99302	2.23901	OsKS1, KS1, KS1A, KSL1, OsKSL1, OsKS1A, OsKS1B, OsKS1C, Ks1, Os KS1, OsTPS26	ent-kaurene synthase gene
LOC_Os08g31410	0.476137	6.48993e-09	8.33443	8.13781	7.13799	5.09859	3.22444	2.91868		sulfate transporter, putative, expressed
LOC_Os01g04920	0.476145	0	10.1399	8.95343	10.1565	4.93698	4.96052	4.02964	OsSQD2, SQD2, SQD2.2, OsSQD2.2	glycosyl transferase, group 1 domain containing protein, expressed
LOC_Os02g17650	0.476926	0	67.1823	62.1976	67.6708	30.9323	31.4468	31.5995	OsVTE1	tocopherol cyclase, chloroplast precursor, putative, expressed
LOC_Os02g03270	0.477738	6.82432e-12	8.2109	6.17127	7.00945	3.59317	3.47592	3.15049		AT hook motif domain containing protein, expressed
LOC_Os05g01240	0.479241	0	26.5112	20.1608	22.9767	11.091	10.2919	11.9956		AML1, putative, expressed
LOC_Os11g47770	0.479478	0	37.6194	32.0412	38.1789	16.5411	17.3913	17.7743		selT/selW/selH selenoprotein domain containing protein, expressed
LOC_Os04g56520	0.479861	0	292.514	291.946	303.365	135.316	142.297	148.42	OsUAM2	alpha-1,4-glucan-protein synthase, putative, expressed
LOC_Os03g11250	0.480137	0	7.01634	7.6848	7.7236	3.36102	3.82793	3.57798		expressed protein
LOC_Os05g32850	0.480183	0	47.7078	45.9095	42.4773	21.3012	22.2553	21.7938	OsCBSDUF1, OsCBSDUF1a, OsCBSDUF1b	CBS domain containing protein, expressed
LOC_Os01g68660	0.480686	0	226.11	308.842	282.663	138.852	115.614	138.55		cysteine proteinase inhibitor precursor protein, putative, expressed
LOC_Os06g46910	0.480858	0	9.85157	7.86548	9.10903	4.49026	3.85554	4.55373		ZOS6-07 - C2H2 zinc finger protein, expressed
LOC_Os07g38640	0.481257	1.05777e-09	5.3614	6.00886	6.39992	2.80192	3.23865	2.51145		inactive receptor kinase At2g26730 precursor, putative, expressed
LOC_Os04g21340	0.481367	0.000304161	3.62957	3.30632	3.71916	1.86037	1.40026	1.86836		expressed protein
LOC_Os04g44780	0.481624	0	12.1657	11.4838	12.059	5.63806	6.52322	5.03678		beta-expansin precursor, putative, expressed
LOC_Os04g52970	0.481903	0	7.98821	8.17616	8.3247	3.53354	3.7883	4.47953		NBS-LRR disease resistance protein, putative, expressed
LOC_Os07g22710	0.482059	0	20.0838	19.0594	19.0227	8.63554	9.25367	10.1501	OsCDPK18, OsCPK18, CDPK5, OsCDPK5, CPK18	CAMK_CAMK_like.32 - CAMK includes calcium/calmodulin depedent protein kinases, expressed
LOC_Os06g02420	0.482169	0	548.17	579.433	542.555	276.433	250.311	278.554		ATOZI1, putative, expressed
LOC_Os10g05010	0.482252	0.00383914	2.90215	2.61255	2.88107	1.3705	1.52644	1.15193		expressed protein
LOC_Os10g09850	0.482958	7.29265e-05	10.3133	22.5848	14.6228	5.81957	8.41811	8.71288	OsDSR-1, DSR-1	calcium-binding protein
LOC_Os12g42970	0.483012	0	26.4075	26.2373	27.937	13.406	11.2657	14.2503	OsGATA25	GATA zinc finger domain containing protein, expressed
LOC_Os08g37595	0.483055	0.0392714	4.07359	3.24289	3.28719	1.4784	1.83808	1.80568		expressed protein
LOC_Os09g23220	0.483945	0	61.7822	40.2588	44.9559	25.1454	21.9728	24.0202		glycosyl hydrolases family 16, putative, expressed
LOC_Os04g35240	0.484202	0	81.4446	74.03	78.2793	33.4758	39.9385	39.7698	OsSAPK7	Stress-Activated Protein Kinase; Sucrose Nonfermenting1–Related Protein Kinase
LOC_Os04g34080	0.484588	1.64125e-09	3.71374	3.32339	3.90167	1.73362	1.87487	1.69231	OsWD40-100	WD-40 repeat family protein, putative, expressed
LOC_Os11g26990	0.484824	0	15.5967	16.7841	16.5969	7.0664	7.74282	8.93634		expressed protein
LOC_Os12g28750	0.484983	0.0110639	3.86021	3.73153	4.53092	2.26309	1.90509	1.7111	OsTDL1A, TDL1A, MIL2, OsTDL1A/MIL2, OsTDL1a	homologues of tapetum determinant1
LOC_Os02g26650	0.485347	0	103.483	96.4029	97.5728	47.3708	47.4111	49.5891		delta14-sterol reductase, putative, expressed
LOC_Os06g23274	0.485614	3.07094e-11	3.11379	4.36467	3.46295	1.61518	1.75213	1.94599		zinc finger, C3HC4 type, domain containing protein, expressed
LOC_Os10g32680	0.486932	0	38.3299	41.4113	32.8834	18.0549	17.3738	19.4119		expressed protein
LOC_Os02g32660	0.486941	0	164.401	161.122	147.113	63.2487	79.2261	87.6715	SBEIII*, SBEIII, Sbe3, RBE3, QEIIa, QEIIA, BEIIb, BEIIB, SBEIIb, OsBEIIb, sbe3, SBE III, OsSBEIIb, SBEIIb	starch branching enzyme IIb
LOC_Os03g41510	0.487082	0	34.1836	24.8484	27.9621	14.1509	14.1071	14.1152		oxidoreductase, aldo/keto reductase family protein, putative, expressed
LOC_Os01g66140	0.48715	0	16.1188	15.3651	16.3332	7.05695	7.69059	8.54659		plus-3 domain containing protein, putative, expressed
LOC_Os08g05470	0.487377	2.86668e-05	4.64506	5.14691	4.50176	2.61257	2.37956	1.9743		expressed protein
LOC_Os02g04260	0.487402	0	70.1701	73.3704	70.0142	34.5549	34.3575	35.1747		expressed protein
LOC_Os03g63490	0.487513	0	16.5599	13.5873	14.7363	6.33159	7.76655	7.78313	panC, PS	pantoate--beta-alanine ligase, putative, expressed
LOC_Os02g51030	0.487552	7.82101e-08	8.01949	9.5582	8.47158	4.40104	4.66006	3.63926		methyltransferase domain containing protein, putative, expressed
LOC_Os05g31600	0.487795	0.00656398	0.955744	1.12979	1.39357	0.514093	0.628652	0.554343		retrotransposon protein, putative, Ty1-copia subclass, expressed
LOC_Os11g38920	0.48797	0	42.0003	40.2528	43.0824	18.1316	22.047	20.9813	BIP124	HVA22, putative, expressed
LOC_Os04g12460	0.488015	0.00975485	1.57258	1.84468	1.25059	0.816872	0.878996	0.582112		Leucine Rich Repeat family protein, expressed
LOC_Os04g24610	0.488188	3.41216e-12	9.08164	11.1426	10.8647	4.37646	5.87524	4.92557		expressed protein
LOC_Os02g56310	0.488283	0	10.2895	9.53067	9.38736	4.70053	4.921	4.64003	OsPPCK1	calcium-dependent protein kinase isoform AK1, putative, expressed
LOC_Os09g39910	0.489037	0	27.7336	29.3634	28.2211	13.03	14.7998	13.8938	OsABCF5, OsABCF5_1, OsABCF5_2, OsABCF5_3	ABC transporter, ATP-binding protein, putative, expressed
LOC_Os01g48760	0.489052	0	42.8584	48.1688	47.0942	24.93	21.2661	21.3524		THAP domain-containing protein 4, putative, expressed
LOC_Os05g45710	0.489116	0	8.88863	9.31133	10.9326	4.94894	4.66034	4.63996		serine acetyltransferase protein, putative, expressed
LOC_Os03g11500	0.489402	0	19.8429	16.8362	17.3344	8.34615	8.59317	9.49501	OsRUS3	DUF647 domain containing protein, putative, expressed
LOC_Os01g21420	0.489553	1.98202e-05	6.51276	9.04076	8.4279	3.68182	5.083	2.97535		pre-mRNA-splicing factor SF2, putative, expressed
LOC_Os10g28660	0.490011	0.0335776	1.26483	1.23484	1.37725	0.586698	0.651932	0.661101		type I inositol-1,4,5-trisphosphate 5-phosphatase, putative, expressed
LOC_Os06g35900	0.490278	0	26.1684	27.1523	27.5054	13.6758	12.8851	13.0663		BES1/BZR1 homolog protein, putative, expressed
LOC_Os07g12630	0.490588	0	42.6821	37.5318	38.4634	18.5007	19.2881	20.4329	OsTFIIS	transcription elongation factor protein, putative, expressed
LOC_Os05g45050	0.490891	0	61.9884	72.3417	62.453	31.3218	34.1612	31.1158		reticulon domain containing protein, putative, expressed
LOC_Os09g37590	0.491261	0.0157229	1.72012	1.36045	1.69319	0.864374	0.595341	0.885447	OsFbox502, Os_F0060	OsFBDUF47 - F-box and DUF domain containing protein, expressed
LOC_Os01g11710	0.491403	0	52.4468	57.4951	60.8126	32.2167	26.2078	25.4847	OsGELP6	GDSL-like lipase/acylhydrolase, putative, expressed
LOC_Os02g42940	0.491421	0	10.1701	10.2933	9.34559	4.7876	4.56761	5.29355		MSP domain containing protein, expressed
LOC_Os05g27350	0.491541	4.2826e-08	7.45848	7.48052	7.32465	3.54079	3.15824	4.24449		expressed protein
LOC_Os06g46900	0.491897	0	9.98605	13.8733	11.3648	5.67378	5.75853	5.89435	Hsa32, OsPPS1	HEAT STRESS-ASSOCIATED 32-KD PROTEIN
LOC_Os08g37270	0.49238	9.87772e-05	4.93304	3.86108	4.52143	2.66117	1.84126	2.05387		heat shock protein DnaJ, putative, expressed
LOC_Os12g29980	0.492911	0	24.7829	25.6119	23.9269	12.4083	12.4736	11.7521	OsGRF7	growth regulating factor
LOC_Os12g40760	0.49298	0	32.6778	37.0366	34.7053	20.4454	14.4811	16.5504		expressed protein
LOC_Os04g49890	0.492998	0	11.5125	13.1043	13.8627	6.04914	6.77159	6.14958		multidrug resistance-associated protein, putative, expressed
LOC_Os06g07230	0.493545	0	8.68481	10.0841	10.4979	4.80778	4.74104	4.89567	OsRLCK200	tyrosine protein kinase domain containing protein, putative, expressed
LOC_Os10g33310	0.493646	0	19.4849	19.4367	19.6326	9.45215	10.2336	9.21931	OsiICK6, Orysa;KRP4, OrysaICK6, Orysa;ICK6, OsKRP4, OsICK6, ICK6	cyclin-dependent kinase inhibitor, putative, expressed
LOC_Os04g19684	0.494073	0	21.1993	18.5666	20.0382	9.24439	9.95964	10.3436		methyl-CpG binding domain containing protein, expressed
LOC_Os01g48420	0.494128	0	394.442	399.345	388.888	199.38	190.802	194.21	OsPrxII C, PrxII C, OsPrxIIC, PrxIIC	peroxiredoxin, putative, expressed
LOC_Os01g42380	0.494366	2.01317e-10	10.3291	6.69255	8.22588	3.9245	3.49938	5.05764	OsPDR9, ospdr9, OsPDR3, PDR3	PDR-type ABC transporter 9
LOC_Os03g12900	0.494411	0	18.9447	21.6408	23.0073	9.78393	10.8943	10.7627		squalene monooxygenase, putative, expressed
LOC_Os12g39070	0.494716	6.94624e-05	7.96086	7.85716	9.76121	3.42892	4.83489	4.39065		TATA-binding protein, putative, expressed
LOC_Os06g40720	0.494776	4.35881e-06	9.52533	6.87336	8.30141	3.0634	4.30338	4.85423		EF hand family protein, putative, expressed
LOC_Os03g12140	0.494931	0	71.976	61.7761	68.7401	31.9055	33.215	35.0991		glucan endo-1,3-beta-glucosidase precursor, putative, expressed
LOC_Os05g04150	0.494944	0	19.609	25.1906	22.4759	11.1106	11.5685	10.6185		expressed protein
LOC_Os03g16718	0.495063	0.0169336	2.57626	2.138	2.72149	1.18963	1.23707	1.25447		expressed protein
LOC_Os12g02830	0.495579	0	15.4042	16.4188	16.0746	7.8726	7.83852	8.02594		SNF7 domain containing protein, putative, expressed
LOC_Os01g19970	0.496217	0	22.9172	23.0121	20.3118	11.4725	10.0028	11.3947		MYB family transcription factor, putative, expressed
LOC_Os01g64256	0.496419	0	10.5376	8.73805	8.86964	4.72893	4.86284	4.3801		transposon protein, putative, Mutator sub-class, expressed
LOC_Os10g30640	0.496469	0	33.7768	31.1092	36.4277	16.5926	16.7614	16.9451		translin, putative, expressed
LOC_Os08g02220	0.496492	0.000158973	7.57991	6.6229	6.57504	3.46834	4.81747	2.03022	OsGH9B16, GH9B16	endoglucanase, putative, expressed
LOC_Os03g58740	0.49654	3.33027e-08	6.29971	5.68242	5.25703	3.20903	2.7744	2.5765		expressed protein
LOC_Os01g63620	0.496741	0	9.3452	11.5613	10.8592	5.34942	4.95007	5.47983		expressed protein
LOC_Os07g05190	0.497133	0	38.8474	32.7997	39.7415	16.0416	19.0555	20.2778		leucine-rich repeat family protein, putative, expressed
LOC_Os04g52400	0.497366	0	55.8243	53.2456	55.1614	26.6733	28.7356	26.2742		oxidoreductase, short chain dehydrogenase/reductase family protein, putative, expressed
LOC_Os03g45220	0.497936	3.25281e-08	27.7745	33.007	31.5064	17.7038	17.6946	10.555		expressed protein
LOC_Os06g04370	0.498059	0	14.2504	10.455	12.9583	5.6371	6.68981	6.43179		expressed protein
LOC_Os05g30350	0.498412	0.00594114	2.43312	1.99229	2.6244	1.38998	0.858071	1.26566	Os5bglu22, Os5Bglu22	Os5bglu22 - beta-glucosidase homologue, similar to G. max isohydroxyurate hydrolase, expressed
LOC_Os01g05470	0.49861	0	70.0668	65.7447	74.3411	33.5011	34.9106	36.3724		transcription factor X1, putative, expressed
LOC_Os10g20710	0.498703	0.0265002	1.81026	1.53651	1.65578	0.709989	0.762036	1.02276	OsFH4, FH4	formin-like protein 6 precursor, putative, expressed
LOC_Os01g65560	0.498989	0	39.1317	37.3694	36.0634	19.8836	19.5789	16.7059		snRK1-interacting protein 1, putative, expressed
LOC_Os12g44240	0.499246	0	40.646	40.2849	43.0805	21.9228	20.4264	19.563		N-acetylglucosaminyltransferase, putative, expressed
LOC_Os05g24010	0.499738	8.18918e-11	6.0537	5.04148	5.43825	2.6029	2.35515	3.30432		receptor protein kinase-like, putative, expressed
LOC_Os01g67570	2.00018	5.90304e-10	14.453	13.2654	15.5043	28.3761	29.6497	28.4276		PDE312/PTAC10, putative, expressed
LOC_Os04g25740	2.00086	0.0166239	2.1546	2.86219	2.8814	5.78212	5.60823	4.41282		expressed protein
LOC_Os01g04020	2.0015	6.82432e-12	90.9315	87.4278	91.1252	193.487	172.235	173.652	OsAP2, OsERF#108, OsERF108, AP2/EREBP#001, AP2/EREBP1, RD2	AP2 domain containing protein, expressed
LOC_Os01g07310	2.0016	6.14189e-11	25.4145	27.6108	26.9802	55.7925	51.7315	52.6147		transporter-related, putative, expressed
LOC_Os09g30120	2.00325	3.58277e-10	13.46	12.2116	12.3697	24.0221	24.532	27.6526	OsCslE1, OsCSLE1	CSLE1 - cellulose synthase-like family E, expressed
LOC_Os11g23790	2.00644	4.59277e-09	11.3744	11.5534	10.2163	22.5729	23.1835	20.7455		expressed protein
LOC_Os05g25210	2.00658	3.70489e-06	4.69621	4.59239	4.61337	9.74018	9.74815	8.40709		expressed protein
LOC_Os04g36800	2.00689	0.00164382	5.46674	3.82566	3.92158	9.76175	9.03498	7.7223		3-oxoacyl-synthase, putative, expressed
LOC_Os02g09220	2.007	0.043956	2.62514	2.28885	2.29383	4.78806	4.60644	5.07161		cytochrome P450, putative, expressed
LOC_Os06g46030	2.00717	4.09459e-11	40.2324	48.8092	41.2422	90.9098	86.7629	83.8293	OsG1L2	DUF640 domain containing protein, putative, expressed
LOC_Os08g22852	2.00786	3.34371e-07	7.19765	7.47377	6.86879	16.4245	14.3676	12.4576	Cen8.t01152	expressed protein
LOC_Os05g33620	2.00986	0.0483408	3.16621	2.28931	2.85374	5.78034	6.04556	4.87457		expressed protein
LOC_Os06g01400	2.01058	1.14478e-08	5.3935	4.79749	5.12102	10.8573	10.6907	9.23801		glycyl-tRNA synthetase 2, chloroplast/mitochondrial precursor, putative, expressed
LOC_Os07g38290	2.01116	0.0287557	5.22088	5.11138	4.85578	11.8059	9.33341	9.40625		plastocyanin-like domain containing protein, putative, expressed
LOC_Os01g08290	2.01135	0.00112626	2.70267	2.69879	2.57649	5.23373	5.65504	5.15773		transmembrane protein, putative, expressed
LOC_Os04g58580	2.01474	2.18378e-10	24.5434	23.6454	21.4367	48.1074	45.7822	46.3881	OsPMM	phosphomannomutase, putative, expressed
LOC_Os12g07820	2.01605	2.18378e-10	28.554	23.2668	26.0937	51.4143	51.7634	53.9018	OsAPx6, OsAPx06, OSAPX6, APx6	ascorbate peroxidase gene
LOC_Os03g17940	2.01628	1.88695e-06	8.69325	7.26252	6.94955	16.2931	14.2643	15.626		phosphatase, putative, expressed
LOC_Os01g02020	2.01715	2.01317e-10	15.2692	15.2806	14.2067	30.521	28.1451	31.6149		acetyl-CoA acetyltransferase, cytosolic, putative, expressed
LOC_Os11g02550	2.01745	0.00361096	1.60214	2.37936	2.19024	4.00966	4.57668	3.86485		expressed protein
LOC_Os11g41600	2.01772	1.09433e-05	6.73309	6.11427	6.95223	14.1443	14.3396	11.4662		expressed protein
LOC_Os11g12330	2.01874	4.13349e-08	4.11831	3.53534	4.66624	8.52831	7.41805	8.92428		disease resistance protein RPM1, putative, expressed
LOC_Os02g04420	2.01964	1.59617e-07	3.58398	3.6862	3.80449	7.23908	7.06422	8.06352		expressed protein
LOC_Os05g03440	2.01985	0.00679914	2.4633	2.62211	2.56748	5.31443	4.86832	5.27492		expressed protein
LOC_Os07g48510	2.02021	7.2679e-10	16.1604	20.0126	17.8767	37.0031	39.8947	32.294		thioredoxin, putative, expressed
LOC_Os06g37610	2.02057	3.75338e-11	25.868	23.2213	23.0706	46.242	50.8831	48.6791		Cyclopropane-fatty-acyl-phospholipid synthase, putative, expressed
LOC_Os01g74190	2.02136	6.36027e-09	14.395	10.0354	10.823	23.6938	23.7484	23.8178		radical SAM enzyme, putative, expressed
LOC_Os11g06010	2.02476	0	11.9706	11.9008	12.3322	23.8104	24.8132	24.6801	OsbHLH151	helix-loop-helix DNA-binding protein, putative, expressed
LOC_Os09g31270	2.02683	4.09084e-08	8.03745	8.02672	7.59681	16.221	15.9235	15.8124		polygalacturonase, putative, expressed
LOC_Os04g25560	2.0274	3.75745e-06	3.31711	3.27214	3.58028	7.15067	6.68653	6.78057	OsSCP23	OsSCP23 - Putative Serine Carboxypeptidase homologue, expressed
LOC_Os02g35820	2.02758	0.000422995	0.994399	0.933977	1.05046	1.96351	2.18539	1.89093		retrotransposon protein, putative, unclassified, expressed
LOC_Os06g36400	2.02793	1.19528e-08	14.0155	12.7248	12.7889	28.1248	25.48	26.5574		HAD superfamily phosphatase, putative, expressed
LOC_Os12g37360	2.02796	0.000170585	9.66456	9.6684	9.40187	21.6761	15.8542	20.7429	OsARL1f, ARL1f	miro, putative, expressed
LOC_Os01g10800	2.03004	0.0359516	1.71879	1.25411	1.42019	2.53127	3.05805	3.32882		pentatricopeptide, putative, expressed
LOC_Os01g21120	2.03441	0	134.048	159.508	168.925	354.308	289.385	297.185	OsERF#068, OsERF068, OsERF68, AP2/EREBP#003, AP2/EREBP3, ERF2	AP2 domain containing protein, expressed
LOC_Os10g10080	2.03453	0.000466715	3.32462	4.35171	4.05235	7.80708	7.39967	8.65563	OsGUT1, GUT1	exostosin family domain containing protein, expressed
LOC_Os03g16800	2.03463	6.82432e-12	25.3759	25.5398	26.6575	55.4834	51.1366	51.2126		clathrin assembly protein, putative, expressed
LOC_Os06g45500	2.03547	1.05575e-05	2.26464	1.74255	1.95117	4.21303	3.91345	4.00156	OsHMA9, oshma9-1, oshma9-2, HMA9	heavy-metal ATPases
LOC_Os11g39020	2.03742	2.24288e-07	4.55564	3.81908	3.87289	7.50003	8.76562	8.6879	OsABCF6	ABC transporter, ATP-binding protein, putative, expressed
LOC_Os02g07870	2.03745	3.07094e-11	17.8342	13.7134	16.5798	32.0906	32.1198	33.8466	VHA-A2, VHAA2	ATP synthase, putative, expressed
LOC_Os02g33580	2.03835	1.63297e-05	3.35304	2.48091	2.73123	5.27811	6.29562	5.88507		digalactosyldiacylglycerol synthase, chloroplast precursor, putative, expressed
LOC_Os09g27240	2.03893	1.4621e-06	4.7991	4.42727	4.93623	9.7733	9.93681	9.16643		mitochondrial carrier protein, putative, expressed
LOC_Os03g15020	2.04106	5.11824e-11	9.54596	9.08518	10.1006	20.3928	18.4185	19.8319	OsBgal8, OsBGal8	beta-galactosidase precursor, putative, expressed
LOC_Os01g47690	2.04146	2.0473e-11	24.6878	25.3352	25.1531	55.6305	48.6441	49.1945	OsGLYII1, GLYII1, OsETHE1, ETHE1, OsGLYII-1	ETHYLMALONIC ENCEPHALOPATHY PROTEIN 1;glyoxalase II
LOC_Os09g32330	2.04153	7.54428e-08	8.03618	8.26765	9.18936	17.3187	17.3266	17.3998	SKIN1	expressed protein
LOC_Os03g06200	2.04199	0	93.3502	95.04	96.8483	206.911	174.002	201.542		aminotransferase, putative, expressed
LOC_Os08g05290	2.04295	0.0101123	1.32106	1.17185	1.5816	2.88551	2.70027	2.73825		receptor-like protein kinase 5 precursor, putative, expressed
LOC_Os02g42960	2.04317	0.00592888	4.95704	4.85307	4.05259	10.2671	9.80261	8.25415		thylakoid lumenal protein, putative, expressed
LOC_Os12g39840	2.04519	1.87669e-10	15.2906	11.2249	12.7648	23.9144	27.4135	29.0078		expressed protein
LOC_Os03g22140	2.04613	6.82432e-12	27.9057	28.8714	25.9057	59.6125	53.2587	56.3086		tetratricopeptide repeat domain containing protein, expressed
LOC_Os01g36070	2.04712	0.0353296	3.29313	5.01036	4.9361	8.54249	9.39744	9.16309	OsSWEET2a, SWEET2a	nodulin MtN3 family protein, putative, expressed
LOC_Os01g52170	2.04781	2.41841e-05	5.15277	4.14587	4.62822	9.69262	10.7703	8.05661	OsISC36	expressed protein
LOC_Os02g38820	2.04942	3.26202e-09	13.3722	12.6996	12.9682	27.7599	30.3123	21.9368		rice cyclin gene
LOC_Os03g01830	2.05211	5.80067e-11	13.1878	11.5046	13.1381	26.626	26.9444	24.062	OsRH50, OsBIRH1	DEAD-box ATP-dependent RNA helicase
LOC_Os01g70740	2.05265	4.36756e-10	12.643	12.3275	13.0394	26.3158	28.0021	23.7033		expressed protein
LOC_Os06g12450	2.05283	0.0150532	3.92972	3.05994	2.50267	5.13995	6.71936	7.62688	alk, SSII-3, OsSSIIa, OsSSII-3, SSIIa, SSS2A, OsSSIIaChr6, SS2a	alkali digestion
LOC_Os11g11990	2.05417	0.0238584	1.03188	1.36909	1.23808	2.18934	2.76775	2.51814		NB-ARC domain containing protein, expressed
LOC_Os08g44760	2.05429	1.10213e-09	5.97358	6.13391	6.80046	12.862	13.6209	12.3596	OsDSR6	domain of unknown function DUF966 domain containing protein, expressed
LOC_Os07g39110	2.05591	0.000829036	5.78162	4.00998	4.86193	11.2772	10.1948	8.65432		AP2/EREBP transcription factor BABY BOOM, putative, expressed
LOC_Os08g02330	2.0572	8.18918e-11	15.1525	17.3633	15.5543	33.5027	33.5091	31.8778		RNA recognition motif containing protein, putative, expressed
LOC_Os10g42190	2.05771	2.96858e-09	6.55318	6.11217	6.28469	13.5992	13.3288	12.0656	OsIRL5	leucine rich repeat containing protein, expressed
LOC_Os05g18274	2.05886	0.00405686	2.84723	3.38936	3.33467	5.78525	7.00663	6.914		expressed protein
LOC_Os01g71050	2.05903	3.71925e-10	10.9869	8.8435	10.0851	21.1193	20.7926	19.6849		MSP domain containing protein, putative, expressed
LOC_Os03g52690	2.06025	0	110.594	120.151	121.463	242.801	246.59	236.245	OsCBSX4, OsCBSX4a, OsCBSX4b, OsCBSX4c, OsCBSX4d, OsCBSX4e, OsCBSX4f	CBS domain containing membrane protein, putative, expressed
LOC_Os02g37590	2.06149	0	54.9956	59.1302	62.9823	120.553	119.561	124.992		glycerophosphoryl diester phosphodiesterase family protein, putative, expressed
LOC_Os04g57300	2.0621	0	19.479	19.4297	19.0055	41.3265	40.1962	37.9025		phosphatidylinositol 3- and 4-kinase family protein, putative, expressed
LOC_Os03g07870	2.06451	0.0203435	4.88483	5.91435	5.28607	12.8721	10.5234	9.81275		expressed protein
LOC_Os01g72520	2.0657	4.12052e-08	4.98158	6.10086	5.87078	12.8203	10.8459	11.3541	OsNPC2	phosphoesterase family protein, putative, expressed
LOC_Os03g61920	2.06648	2.8628e-09	10.1692	8.26837	7.49628	18.4027	18.7186	16.4705		electron transfer flavoprotein subunit alpha, mitochondrial precursor, putative, expressed
LOC_Os03g45710	2.06683	0.00591397	5.34094	5.59227	4.99352	11.7844	11.7796	9.35395	OsFdC1, FdC1	2Fe-2S iron-sulfur cluster binding domain containing protein, expressed
LOC_Os01g43070	2.06691	3.85574e-10	11.0512	9.56874	10.0282	22.5613	23.2888	17.4969		psbP-related thylakoid lumenal protein 4, chloroplast precursor, putative, expressed
LOC_Os06g05750	2.06746	0.010897	2.16518	2.30597	2.07088	4.64616	4.78253	4.09672		transferase family domain containing protein, expressed
LOC_Os05g50990	2.06755	0	14.3431	13.7731	13.9396	29.7214	29.9355	27.2958		TTL3, putative, expressed
LOC_Os12g02490	2.06795	8.78399e-07	2.29213	2.03325	2.14693	4.74548	4.32834	4.31056		expressed protein
LOC_Os06g30130	2.06878	0.00240952	3.23832	4.70542	3.84849	9.32783	8.07242	6.99527		cysteine-rich receptor-like protein kinase 10 precursor, putative, expressed
LOC_Os03g03810	2.06886	0.00096491	42.6828	60.8037	32.5586	84.9147	95.9455	100.598	DEFL8, OsDEFL8, OsDf-08, Df-08	DEF8 - Defensin and Defensin-like DEFL family, expressed
LOC_Os03g47740	2.06958	1.60371e-10	6.03915	6.04759	6.9486	13.6645	14.052	11.6787	OsBIHD1, BIHD1	rice homeodomain gene
LOC_Os03g56220	2.07158	0.000130666	6.64416	5.00789	4.52253	12.6845	11.1201	9.70236		stress-induced protein, putative, expressed
LOC_Os11g06230	2.07203	0.000904029	2.49684	2.63462	2.42006	5.38092	4.91299	5.3531		expressed protein
LOC_Os06g05930	2.0726	0.00189258	16.1312	12.3831	15.041	36.891	30.0804	23.3012		expressed protein
LOC_Os10g39920	2.07379	4.26342e-06	5.62947	6.75917	6.57582	13.1107	14.0134	12.2043		expressed protein
LOC_Os01g09010	2.07491	3.41216e-12	20.5582	23.0415	19.8439	48.0589	39.3325	44.2487	OsAT9, OsAt9	transferase family protein, putative, expressed
LOC_Os02g48350	2.07526	4.333e-07	5.78668	4.58762	4.55817	11.1608	10.3235	9.50446	OsDGAT	diacylglycerol O-acyltransferase, putative, expressed
LOC_Os04g54230	2.07549	0.00337839	18.2446	29.3588	27.7244	63.7352	50.2191	42.3876		wound induced protein, putative, expressed
LOC_Os09g38420	2.07572	3.36439e-09	6.84935	5.70563	6.31124	12.9886	12.867	13.3053		cysteinyl-tRNA synthetase, putative, expressed
LOC_Os09g15330	2.07582	0.00959297	3.18176	2.25656	2.38191	6.04296	5.34137	4.84906		transporter family protein, putative, expressed
LOC_Os02g51350	2.0773	7.84797e-11	11.7066	9.00629	10.8717	23.2463	21.9155	20.449	OsFbox109, Os_F0628	OsFBK10 - F-box domain and kelch repeat containing protein, expressed
LOC_Os01g29840	2.07745	0.00843935	5.81842	5.89392	3.58014	8.92214	11.1139	11.7333	ONAC026, ONAC26, OsEnS-8	no apical meristem protein, putative, expressed
LOC_Os09g27734	2.07836	2.08142e-10	9.29368	9.04899	9.70509	19.8315	19.6547	18.8071		expressed protein
LOC_Os06g49790	2.07856	6.82432e-10	7.34056	7.3562	8.26774	16.1172	17.4756	14.1402		acyltransferase, putative, expressed
LOC_Os07g40240	2.07873	0.000609896	2.71333	3.92731	4.11124	6.99641	7.73537	7.61844		GASR9 - Gibberellin-regulated GASA/GAST/Snakin family protein precursor, expressed
LOC_Os05g06814	2.07906	1.10145e-08	7.82545	5.61911	6.15189	12.4068	14.6269	13.7085		expressed protein
LOC_Os05g39760	2.0812	1.06804e-07	3.08546	3.30068	3.46968	7.06215	6.87126	6.57852		VHS and GAT domain containing protein, expressed
LOC_Os03g16980	2.0814	0	98.6131	91.6374	93.2921	205.068	186.661	198.436	UXS, UXS-3, OsUXS3	NAD dependent epimerase/dehydratase family domain containing protein, expressed
LOC_Os09g10760	2.08488	1.43311e-10	16.1595	17.2759	18.1849	41.3968	36.8523	29.3732		RNA recognition motif containing protein, putative, expressed
LOC_Os07g38280	2.08569	9.49126e-08	2.72944	2.44445	2.55566	4.70698	5.7625	5.65196		insulin-degrading enzyme, putative, expressed
LOC_Os02g12310	2.08715	0.0054376	19.18	23.2006	11.8937	32.2941	43.8002	37.1845	tms5, NAC18, ONAC023, ONAC23, NAC23, TMS5/ONAC023, OsEnS-30	NAC gene
LOC_Os02g25060	2.08939	3.41216e-12	14.5227	13.2758	13.7721	27.4753	30.1183	29.2636	OsNTMC2T1.1	NTMC2Type1.2 protein, putative, expressed
LOC_Os12g16720	2.08995	0.0214983	1.81429	1.98961	1.91656	4.48033	3.526	3.94916	sl (spl1), sl*, sl, spl1, CYP71P1, T5H	Sekiguchi Lesion Gene;Cytochrome P450 Monooxygenase
LOC_Os02g18450	2.09056	6.82432e-11	8.10659	7.01154	7.42317	15.4068	16.4802	15.2368		GTP-binding protein typA/bipA, putative, expressed
LOC_Os04g16842	2.09064	0.00632162	9.66003	6.87566	10.4979	14.1722	20.8545	21.4908		DNA-directed RNA polymerase subunit alpha, putative, expressed
LOC_Os04g52900	2.09322	0	32.6743	24.5263	32.4227	59.7721	62.198	65.6309	OsABCC1, ABCC1, OsABCC1-1, OsABCC1-2, OsMRP1	ATP-binding cassette transporter
LOC_Os02g38210	2.09399	0	33.2175	29.7781	30.7934	72.2474	65.9278	58.2183	tufA, EF-Tu	green-revertible albino gene
LOC_Os09g34910	2.09402	0	90.9112	80.835	89.7448	159.779	189.042	198.748	OsRH7	DEAD-box ATP-dependent RNA helicase 7, putative, expressed
LOC_Os02g57670	2.09422	1.36486e-11	27.6036	24.4895	22.157	57.0457	55.0496	43.4008		ribosomal L9, putative, expressed
LOC_Os11g42070	2.096	8.18918e-07	1.72799	1.5752	1.85393	3.58187	3.93353	3.29393		Leucine Rich Repeat family protein, expressed
LOC_Os01g51010	2.09624	7.39347e-08	2.21926	2.38434	2.14051	4.55776	5.00996	4.56954		DUF292 domain containing protein, expressed
LOC_Os07g33780	2.09764	5.00496e-08	4.08429	5.02816	5.18952	9.15684	10.7578	10.0858	ABCG43, OsABCG43, ABCG43/PDR5, OsPDR5	ATP binding cassette (ABC)-type transporter
LOC_Os05g11120	2.10011	0.0106236	9.9204	7.04451	7.57142	19.6541	19.9022	11.9725		prenylated rab acceptor, putative, expressed
LOC_Os09g19930	2.10026	0	15.7294	14.588	15.6943	34.4725	28.3946	33.7696	ONI3	long-chain fatty acid ω-alcohol dehydrogenase
LOC_Os10g39710	2.10105	2.99474e-06	5.56918	7.49255	5.73152	15.0026	11.7744	12.7085	OsSTRL19, STRL19	strictosidine synthase, putative, expressed
LOC_Os11g34460	2.10137	3.41216e-12	6.14124	6.34015	8.0742	14.9492	14.6289	13.6167	OsFbox609, Os_F0370, OsFKF1	OsFBO10 - F-box and other domain containing protein, expressed
LOC_Os03g61030	2.10153	9.17915e-07	6.67971	5.64248	7.90643	13.0625	15.1563	14.2924		transcription termination factor nusG family protein, expressed
LOC_Os03g64014	2.10315	0.000660809	3.65019	3.25296	3.12466	7.84302	7.12412	6.12285		expressed protein
LOC_Os02g12870	2.10351	3.93173e-06	3.02538	2.9808	3.07646	6.73471	6.25781	6.11295		expressed protein
LOC_Os01g54400	2.10478	1.53805e-06	5.29631	4.24056	5.36929	11.3326	10.1036	9.93792	OsVQ3	VQ domain containing protein, putative, expressed
LOC_Os03g20640	2.10577	2.0592e-07	6.89795	6.77594	6.0642	14.9353	14.5702	12.0584		expressed protein
LOC_Os03g52630	2.10625	0	39.0971	46.4338	41.4146	92.5044	91.9849	82.8898	OsGH9A3	glycoside hydrolase gene
LOC_Os02g36400	2.10692	2.65196e-06	3.56014	3.38362	3.55937	7.47548	7.48697	7.16685		ubiquitin carboxyl-terminal hydrolase domain containing protein, expressed
LOC_Os03g61220	2.10732	0	27.4165	23.8159	25.3523	51.2371	58.2958	51.8559	OsRH3	DEAD-box ATP-dependent RNA helicase 3, putative, expressed
LOC_Os06g19444	2.10743	3.76702e-09	5.30897	5.08331	5.14306	10.327	11.053	11.3596	OsBBX19, OsM, DTH2, qDTH-2, OsCCT22	CCT/B-box zinc finger protein, putative, expressed
LOC_Os03g52880	2.10829	3.27448e-07	3.03639	2.42411	2.69436	6.20498	5.56936	5.41845		BTBN9 - Bric-a-Brac, Tramtrack, Broad Complex BTB domain with non-phototropic hypocotyl 3 NPH3 and coiled-coil domains, expressed
LOC_Os01g02300	2.10885	0.000963149	1.87117	2.24217	2.12128	4.56379	4.35537	4.22869	OsRLCK3	receptor kinase ORK10, putative, expressed
LOC_Os06g19990	2.10924	0.000467285	8.85421	5.14917	6.69616	15.1176	14.4031	14.1395		GPI-anchored protein, putative, expressed
LOC_Os03g14120	2.1094	3.75338e-11	6.80015	7.27273	7.80723	14.6917	16.3914	15.0708		Dihydrodipicolinate reductase
LOC_Os01g37920	2.11124	0.000703562	58.9754	64.8821	64.1325	180.667	116.547	99.6788		expressed protein
LOC_Os03g30830	2.11443	0.000200873	9.07209	7.67278	9.12957	22.938	16.3363	15.4354		X8 domain containing protein, expressed
LOC_Os06g36450	2.11482	0.00176106	1.99772	2.35929	1.94801	4.45308	4.10834	4.77258		ferroportin1 domain containing protein, expressed
LOC_Os01g48850	2.11562	6.82432e-12	11.8069	11.8534	12.5024	27.2808	25.2929	23.9329		auxin-responsive protein, putative, expressed
LOC_Os07g26940	2.1162	6.82432e-12	19.0847	27.1301	22.2939	50.8434	47.9775	46.1573		orosomucoid; thermosensitive male sterility-2
LOC_Os05g34470	2.11648	9.55405e-11	6.26514	4.98754	5.63139	11.7647	12.1261	11.844		expressed protein
LOC_Os03g11900	2.11742	0.00498559	1.62536	2.13571	1.94902	4.30455	4.30373	3.48237	OsMST4	monosaccharide transporter gene
LOC_Os11g11580	2.12315	1.78765e-06	1.68834	2.10204	2.26267	4.7612	3.96538	4.12493		NB-ARC domain containing protein, expressed
LOC_Os04g21950	2.12399	3.41216e-12	14.6392	15.0498	15.8059	35.5313	29.659	31.4403	OsWRKY51	WRKY transcription factor
LOC_Os08g44000	2.12497	0.000457833	1.78663	1.7307	1.49977	3.71944	3.87064	3.07109		uncharacterized protein ycf39, putative, expressed
LOC_Os01g59730	2.12538	0.00123376	11.115	7.77532	8.86956	17.5197	18.3473	23.1332		ribosomal protein L7Ae, putative, expressed
LOC_Os06g04200	2.12644	0.0189897	29.3015	28.2922	14.0257	42.2172	54.6543	55.423	wx (Wx(am)), Wx, WX-B, GBSS-I, GBSS, OsGBSSI, GBSS1, OsGBSS1, GBSSI, GSS	waxy gene
LOC_Os07g36630	2.12724	0.000240596	1.69223	2.0592	2.36364	4.70532	4.23778	4.06509	OsCslF8, OsCSLF8	CSLF8 - cellulose synthase-like family F%3B beta1,3%3B1,4 glucan synthase, expressed
LOC_Os11g33000	2.13026	0.0290462	369.19	546.567	257.509	683.642	866.906	948.811	Prol-23, pro10.4	SSA5 - 2S albumin seed storage family protein precursor, expressed
LOC_Os12g02320	2.13104	3.00049e-05	241.217	370.503	331.226	820.612	610.769	578.079	OsLTP1.18, OsLTP1, nsLTP1, a15, OsLtpI.18	LTPL12 - Protease inhibitor/seed storage/LTP family protein precursor, expressed
LOC_Os11g26150	2.13186	0.00761845	2.58529	2.57996	3.51621	6.95036	6.20084	5.35649		expressed protein
LOC_Os05g25450	2.13274	9.89526e-11	4.1769	4.25923	4.64287	9.31989	10.728	7.84628	OsCrRLK1L3	TKL_IRAK_CrRLK1L-1.3 - The CrRLK1L-1 subfamily has homology to the CrRLK1L homolog, expressed
LOC_Os10g12620	2.13583	0.000149254	1.69542	2.24075	1.73884	4.30119	4.29481	3.52484	OsRLCK295	protein kinase domain containing protein, expressed
LOC_Os02g08230	2.13599	0	17.6601	15.6284	17.3303	38.6143	34.7771	34.7301	OsGL1-2	Glossy1-homologous gene
LOC_Os03g19400	2.13615	0.000676618	5.84703	4.40727	4.3093	9.33843	11.4121	10.3594		expressed protein
LOC_Os12g25494	2.13669	6.82432e-12	5.88153	5.73847	5.66441	10.6092	12.7178	13.6045		transposon protein, putative, unclassified, expressed
LOC_Os04g38530	2.13702	4.86335e-08	6.00477	5.98431	5.29998	12.2683	12.1926	12.4861	GalM4	aldose 1-epimerase, putative, expressed
LOC_Os07g11510	2.13719	0.00407758	101.441	125.373	59.6877	180.588	217.433	214.29	RA16, OsEnS-100	RAL6 - Seed allergenic protein RA5/RA14/RA17 precursor, expressed
LOC_Os12g04480	2.13784	3.48825e-08	4.50471	3.85675	4.2798	9.62411	9.1755	8.22534	OsCPD2, CYP90A4, CYP90A4/OsCPD2	cytochrome P450, putative, expressed
LOC_Os02g15150	2.13989	0.0388298	276.812	305.661	147.761	418.391	511.933	632.295	Glu7*(GluB2), Glu7, GluB2, GLUB2, GLUB-2, GluB-2, GluB-7, GLUB7	glutelin, putative, expressed
LOC_Os02g49310	2.14017	1.12089e-08	3.58058	4.40288	4.17644	8.99638	8.78496	8.24294		AGC_PVPK_like_kin82y.7 - ACG kinases include homologs to PKA, PKG and PKC, expressed
LOC_Os03g48920	2.1431	1.65831e-09	6.77084	5.67612	6.47135	14.1281	14.6319	11.7838		DUF1517 domain containing protein, putative, expressed
LOC_Os10g36690	2.14321	0	39.7198	38.3106	41.7915	88.6719	83.0646	85.067		dehydration response related protein, putative, expressed
LOC_Os07g07040	2.1434	0	28.169	36.6506	29.3903	70.0127	66.2742	65.6424		erythrocyte binding protein 3, putative, expressed
LOC_Os03g43430	2.14382	1.14975e-06	10.9993	11.2581	10.0317	26.7781	22.7501	19.694		mttA/Hcf106 family protein, putative, expressed
LOC_Os03g20560	2.14414	1.19142e-07	6.66574	7.33856	7.69241	15.8754	14.7289	15.9164		biotin--protein ligase, putative, expressed
LOC_Os08g42470	2.14548	0	22.5426	22.9043	23.4216	46.844	49.9563	50.9559	OsbHLH080	BEE 1, putative, expressed
LOC_Os01g43680	2.14566	2.16812e-07	3.70428	4.80605	3.80288	9.43828	8.95163	8.03012		CPuORF29 - conserved peptide uORF-containing transcript, expressed
LOC_Os01g08890	2.14601	2.0473e-11	6.21659	6.8827	5.94468	13.2306	14.2521	13.3858		expressed protein
LOC_Os01g62900	2.14663	1.0577e-07	47.7384	29.5882	36.0681	70.8654	87.7969	84.7537	P5CS2, OsP5CS2, OsALDH18B2, ALDH18B2	Rice Aldehyde Dehydrogenase
LOC_Os06g22690	2.14977	6.82432e-12	26.7791	19.8733	22.5759	51.0112	51.5962	46.2177		bundle sheath defective protein 2, putative, expressed
LOC_Os03g55740	2.15036	0.0463595	9.54382	6.86617	4.7487	15.2911	13.8318	16.3759	Prol-02, pro10.3	SSA4 - 2S albumin seed storage family protein precursor, expressed
LOC_Os09g27700	2.1515	3.75338e-11	5.39973	5.4062	5.74563	10.6563	13.735	11.2194		microtubule associated protein, putative, expressed
LOC_Os01g49529	2.15401	0	5.9888	5.56643	6.429	13.2008	12.4231	13.1144	OsWAK10	OsWAK10d - OsWAK receptor-like cytoplasmic kinase OsWAK-RLCK, expressed
LOC_Os05g29990	2.15674	0	30.2755	33.8403	33.2937	77.8892	71.7367	60.4605	OsUXS5, UXS-5	NAD dependent epimerase/dehydratase family domain containing protein, expressed
LOC_Os03g40830	2.15737	5.80067e-11	4.54381	3.85193	4.92821	10.7368	9.41981	8.58814	OsSub30, SUB30	OsSub30 - Putative Subtilisin homologue, expressed
LOC_Os02g07680	2.15753	0	13.4636	18.3103	16.1888	37.1223	33.8885	32.4701	CYP97B4, CYP97B4a	cytochrome P450, putative, expressed
LOC_Os05g37700	2.15848	8.18918e-11	3.62702	4.50663	4.29483	9.2063	9.21431	8.40604		periplasmic beta-glucosidase precursor, putative, expressed
LOC_Os11g09864	2.15949	4.54807e-08	2.51335	3.2265	2.85754	5.71552	6.20614	6.64428		wali7, putative, expressed
LOC_Os05g32110	2.16003	0	37.8695	41.0075	39.8802	89.8696	88.6146	78.0355		COBRA, putative, expressed
LOC_Os07g37650	2.16233	0	58.979	58.8752	55.3903	122.661	126.115	125.836		GTPase-activating protein, putative, expressed
LOC_Os05g07280	2.16297	0.0481157	1.05027	1.16098	1.33138	2.84997	2.23919	2.57344		expressed protein
LOC_Os05g21180	2.16399	2.72973e-11	7.56529	5.94664	6.6337	15.3556	15.4365	12.8029		phosphatidic acid phosphatase-related, putative, expressed
LOC_Os01g44220	2.16469	0.000157137	22.0767	19.4183	12.7913	33.2402	36.7801	47.4924	OsAGPL2, osagpl2, APL2, OsAPL2, AGPiso, sh2, Sh2, GIF2, GAS1	large subunit of ADP-glucose pyrophosphorylase; shrunken-1; ADP-glucose pyrophosphorylase large subunit 2
LOC_Os02g36680	2.16768	0.000173819	16.3173	19.656	10.6738	31.5369	37.2735	32.3058	OsEnS-39	expressed protein
LOC_Os11g04030	2.16988	0.0164473	2.0303	1.49033	1.27819	3.1741	3.2272	4.01156	OsZIFL5, OsTOM2, TOM2	major facilitator superfamily antiporter, putative, expressed
LOC_Os05g09400	2.1711	0	17.6548	14.6247	14.9049	39.8776	34.1389	28.4253		30S ribosomal protein S31, chloroplast precursor, putative, expressed
LOC_Os04g57550	2.17541	0.00058389	2.0916	1.87974	1.91312	4.79381	3.88442	4.12287	OsPAO4, OsAO1, AO1	amine oxidase, flavin-containing, domain containing protein, expressed
LOC_Os02g57290	2.17663	6.44898e-10	1.9777	2.00042	2.44559	4.77031	5.0078	4.20392	CYP97A4, OsCYP97A4	Carotenoid β-Ring Hydroxylase
LOC_Os05g32380	2.17673	0.000114995	2.96582	3.09288	2.77834	6.88938	6.93104	5.41542		phospholipase, putative, expressed
LOC_Os11g43600	2.1768	0.00142169	3.33749	2.92802	3.12991	6.40045	8.05601	5.9955		peptide chain release factor protein, putative, expressed
LOC_Os06g36380	2.17848	0.0117537	3.88971	5.06701	4.63195	10.7326	9.47758	9.39246		expressed protein
LOC_Os05g33960	2.17923	1.39899e-10	5.2995	5.14274	5.46622	12.8882	10.4306	11.3494		peptide transporter PTR2, putative, expressed
LOC_Os02g21280	2.17928	9.3152e-10	12.1984	12.8441	12.3676	29.4512	28.1137	23.9621		POEI30 - Pollen Ole e I allergen and extensin family protein precursor, expressed
LOC_Os05g47930	2.1793	0	10.8069	9.99761	10.1812	21.879	23.2092	22.4391	OsQSOXL1	OsQSOXL1 quiescin-sulfhydryl oxidase-like OsQSOXL1, expressed
LOC_Os07g29820	2.18081	0.00133652	1.03673	1.40978	1.39244	2.63461	2.9471	2.79033		NBS-LRR disease resistance protein, putative, expressed
LOC_Os05g35460	2.18325	0	26.4178	24.2748	26.2802	55.6248	62.3965	50.029		patellin protein, putative, expressed
LOC_Os01g72020	2.18331	0.0007537	2.78516	2.85069	3.43687	8.3231	6.08061	5.40488	OsNPR5	BTBA3 - Bric-a-Brac,Tramtrack, Broad Complex BTB domain with Ankyrin repeat region, expressed
LOC_Os03g02090	2.18346	3.07094e-11	6.51439	7.43473	7.06433	15.6435	14.8369	15.4017		expressed protein
LOC_Os10g11354	2.18418	0.0024927	2.10647	2.24977	2.41872	5.55341	4.18417	5.0602		MATE efflux family protein, putative, expressed
LOC_Os03g08080	2.18444	0.000506676	9.4901	7.17061	8.03058	21.5223	19.3704	13.0441		YGGT family protein, putative, expressed
LOC_Os11g05556	2.18567	3.24155e-10	5.87751	4.66362	5.04113	12.1934	12.4269	9.43737		signal recognition particle 54 kDa protein, putative, expressed
LOC_Os06g45370	2.18685	0.0193582	2.18987	1.85494	2.55263	5.00885	4.67648	4.74225		fructose-1,6-bisphosphatase, putative, expressed
LOC_Os02g52550	2.18742	1.35122e-09	8.87286	10.6157	10.3864	21.2089	21.3029	22.837	OsFWL1	uncharacterized Cys-rich domain containing protein, putative, expressed
LOC_Os05g25540	2.18932	0.0113206	1.74581	1.97498	2.84723	4.7712	5.13068	4.4776		STRUBBELIG-RECEPTOR FAMILY 6 precursor, putative, expressed
LOC_Os10g41190	2.1899	7.16553e-10	3.89083	3.48173	4.25109	8.15588	8.55485	8.74384		transporter family protein, putative, expressed
LOC_Os03g32170	2.19224	0	11.265	9.55168	10.911	26.9835	21.7082	20.8631		NAD dependent epimerase/dehydratase family protein, putative, expressed
LOC_Os04g48230	2.19465	0	14.0995	11.8202	12.7094	30.9564	26.5639	27.257		dehydration response related protein, putative, expressed
LOC_Os03g14950	2.19589	0.00374917	2.59657	2.46587	2.06428	4.43901	6.30501	4.9055	OspPLAIIIalpha, pPLAIIIalpha	PLA IIIA/PLP7, putative, expressed
LOC_Os01g39290	2.19644	0.000527867	5.46142	4.77293	3.861	12.5399	9.59654	8.82324		harpin-induced protein 1 domain containing protein, expressed
LOC_Os02g09150	2.1983	0	56.3153	58.0196	59.0115	130.351	126.451	124.265		inorganic H%2B pyrophosphatase, putative, expressed
LOC_Os08g35190	2.19908	1.95459e-07	4.44893	3.65722	4.40369	8.44962	8.96234	10.0982		auxin-repressed protein, putative, expressed
LOC_Os12g05260	2.19915	0	22.8608	24.2176	23.4854	55.6008	48.5073	51.0724	OsPSK3, GREP2, OMT9	phytosulfokines precursor, putative, expressed
LOC_Os04g57800	2.19938	0.000793216	1.67646	2.16438	1.97221	4.8823	4.27436	3.62841		BTBN13 - Bric-a-Brac, Tramtrack, Broad Complex BTB domain with non-phototropic hypocotyl 3 NPH3 and coiled-coil domains, expressed
LOC_Os11g34390	2.20016	0.00659286	2.7281	2.71682	2.41456	6.85448	5.38965	5.04795	OsGT6	glycosyltransferase, putative, expressed
LOC_Os03g57840	2.20017	0	12.6816	10.3895	13.9594	25.8119	28.6169	27.0446		peptidase M50, mammalian sterol-regulatory element binding protein, putative, expressed
LOC_Os05g36994	2.20045	4.09459e-11	6.73335	7.05744	7.31812	15.2261	16.9256	14.2975		expressed protein
LOC_Os09g15420	2.20212	0.0262359	2.41106	1.79476	2.39262	4.11204	5.30359	5.11492	OsUGE4	NAD dependent epimerase/dehydratase family protein, putative, expressed
LOC_Os03g20790	2.2039	3.41216e-12	20.2579	27.4463	27.6467	61.6377	58.0146	46.4135	EIL1, OsEIL1, MHZ6/OsEIL1, MHZ6	ethylene-insensitive
LOC_Os06g19370	2.20393	6.3313e-05	1.22255	1.01577	1.12434	2.48628	2.54077	2.38401		cadmium tolerance factor, putative, expressed
LOC_Os02g14090	2.20435	0.00541173	1.622	2.14677	2.48154	4.60937	5.22409	3.94438		berberine and berberine like domain containing protein, expressed
LOC_Os01g12690	2.2044	0.00115464	2.78989	2.85553	2.46271	6.0303	5.58723	6.256	OsOFP1, OsOFP01, OFP1	plant-specific domain TIGR01568 family protein, expressed
LOC_Os02g25640	2.20541	0.0236345	204.802	253.512	116.27	318.404	462.718	486.071	GluC, OsEnS-36, GLU2.2	glutelin gene
LOC_Os05g27780	2.20584	0	66.7053	79.3251	81.8198	172.347	170.773	159.48		expressed protein
LOC_Os01g32730	2.20601	3.41216e-12	10.6426	9.09584	9.87983	23.3728	22.1917	19.7738	OsFLU1, FLU1	tetratricopeptide repeat containing protein, putative, expressed
LOC_Os07g38030	2.20609	0.0190628	1.97819	1.81883	1.80636	4.71758	3.81245	3.83155		GRAS family transcription factor domain containing protein, expressed
LOC_Os01g57870	2.2064	9.31858e-05	1.15358	1.11775	1.20236	2.45786	2.48286	2.72364		disease resistance protein RPS2, putative, expressed
LOC_Os07g38000	2.20646	0.00114936	3.82481	4.63159	4.21115	10.2868	9.89918	7.76451		cytochrome c, putative, expressed
LOC_Os04g01160	2.20672	0	7.25557	7.07681	7.28137	16.9431	16.0106	14.7418		zinc finger family protein, putative, expressed
LOC_Os11g32880	2.20826	0	5.28417	6.35453	5.95051	12.2514	14.058	12.5321		DEAD-box ATP-dependent RNA helicase, putative, expressed
LOC_Os02g36880	2.20841	0.0175741	2.73828	5.27782	3.49371	9.82864	8.30393	7.28576	OsNAC1, ONAC027, ONAC27, NAC27, OMTN1, OsNAC1/ONAC027	NAC gene
LOC_Os04g51050	2.2086	5.11824e-11	2.98129	3.09814	3.32611	6.32882	7.36607	7.07818	OsWAK53, OsWAK53a	OsWAK53b - OsWAK receptor-like protein kinase, expressed
LOC_Os04g45900	2.20996	3.15702e-06	4.60953	2.73259	3.89992	8.76224	7.72906	8.35313	OsYSL16, Os-YSL16, OsYs14	yellow stripe 1-like gene
LOC_Os02g56920	2.20997	0	40.7884	32.9745	43.9526	99.724	72.9687	87.4554	Os0053, OsGL1-6	Glossy1-homologous gene
LOC_Os02g08530	2.21094	8.5304e-11	4.88012	5.92296	4.92987	12.1945	12.0749	10.5151		protein kinase family protein, putative, expressed
LOC_Os09g39180	2.21317	0	19.4443	17.3567	18.1721	45.0651	41.0953	35.5042		RNA recognition motif containing protein, putative, expressed
LOC_Os08g32080	2.21347	0	20.6766	17.054	19.5145	46.0505	42.9028	37.7572	Oshox5, OsHox5, EIP9	CPuORF27 - conserved peptide uORF-containing transcript, expressed
LOC_Os05g50310	2.21421	0.0103502	2.82501	5.09951	4.06945	9.60161	8.86493	8.09065	OsZHD6	ZF-HD protein dimerisation region containing protein, expressed
LOC_Os05g46720	2.21488	0.000586345	2.27914	2.37942	2.69654	5.5661	6.5714	4.15316	OsSNDP6, SNDP6	phosphatidylinositol transfer, putative, expressed
LOC_Os05g23130	2.21564	6.80777e-05	4.6993	5.45448	5.0154	11.3934	12.6897	9.52642		expressed protein
LOC_Os12g39130	2.2161	4.77702e-11	21.1565	17.5117	17.3935	47.5175	39.4092	37.3119		fibroin heavy chain precursor, putative, expressed
LOC_Os02g12400	2.21612	3.34392e-10	2.12088	2.51581	2.49268	5.03944	5.0194	5.74071		receptor-like protein kinase precursor, putative, expressed
LOC_Os10g14180	2.21681	3.75338e-11	1.52817	1.28171	1.53958	3.46275	3.44051	2.73868		expressed protein
LOC_Os01g57890	2.21741	6.46863e-05	2.0134	1.83409	2.4034	4.6743	4.1495	5.037	OSTF1(t), OsTF1	Homeobox domain containing protein, expressed
LOC_Os11g16530	2.21853	0.00959176	0.802776	0.748301	0.772315	1.82972	1.80467	1.52012		mal, putative, expressed
LOC_Os03g04000	2.21978	0.0379351	1.28059	1.57286	1.10928	3.16606	2.75623	2.8741	OsACS4, ACS4	AMP-binding domain containing protein, expressed
LOC_Os11g45790	2.22048	1.69926e-09	2.33911	2.76657	2.47098	5.58981	5.36521	5.86879		NB-ARC domain containing protein, expressed
LOC_Os03g18880	2.22079	0.0052612	3.06605	4.11566	3.50438	9.09277	7.75644	6.88234		retrotransposon protein, putative, unclassified, expressed
LOC_Os08g36480	2.22088	0.000344096	2.07017	1.60251	2.60955	5.10524	3.86787	4.97896	OsNR1, NR1, nia1, OsNIA1, NIA1	nitrate reductase, putative, expressed
LOC_Os03g56470	2.22103	0.00035915	1.99819	2.01995	1.746	4.8346	4.10738	3.86038		protein kinase family protein, putative, expressed
LOC_Os02g42020	2.22128	0	5.60019	5.99419	6.26389	13.1511	12.8947	13.6224		expressed protein
LOC_Os03g25940	2.22194	0	35.3578	30.3129	36.7304	73.647	76.2126	77.6695		cystathionine gamma-synthase, putative, expressed
LOC_Os11g25454	2.2224	3.41216e-12	10.5728	6.91574	8.61698	18.9998	19.1575	19.8595		cytokinin-N-glucosyltransferase 1, putative, expressed
LOC_Os12g43130	2.22291	3.41216e-12	8.86326	10.9317	8.81447	20.089	22.9665	20.5406	PSY2, OsPSY2	phytoene synthase, chloroplast precursor, putative, expressed
LOC_Os02g09810	2.22415	0.000429604	2.66927	2.33301	2.69302	6.20933	6.12024	4.78597	OsATL6	amino acid transporter, putative, expressed
LOC_Os01g68589	2.22519	0	37.8494	26.7768	25.9963	69.1958	60.351	72.1049	OsLTPd2, OsLtpIV.2	LTPL39 - Protease inhibitor/seed storage/LTP family protein precursor, expressed
LOC_Os02g07930	2.22628	0.0332633	1.98463	1.836	2.09651	5.02483	4.53347	3.61492		B-box zinc finger family protein, putative, expressed
LOC_Os03g13274	2.2268	9.48922e-09	2.92876	3.12053	2.89099	6.70724	6.79983	6.40117	OsNRT1, OsNRT1;1, OsNRT1.1, OsNRT1.1a, OsNRT1.1b, NRT1.1, NRT1.1a, NRT1.1b, OsNPF8.9, NPF8.9	low-affinity nitrate transporter
LOC_Os04g44410	2.22781	0.0129617	2.00052	2.70282	2.19783	5.10683	5.07753	5.19014	OsSCP25	OsSCP25 - Putative Serine Carboxypeptidase homologue, expressed
LOC_Os09g27420	2.22818	0	27.7799	24.3597	25.1198	56.9465	59.5358	55.666		formate--tetrahydrofolate ligase, putative, expressed
LOC_Os01g56790	2.22898	1.02365e-11	3.14459	3.84902	3.57871	8.45482	7.718	7.39267		expressed protein
LOC_Os06g29810	2.22938	1.70608e-11	2.42187	2.9718	3.12532	6.30634	6.59401	6.09174	Pi-d2, Pi-d(t)2, PiD2(t), Pid2, PI-D2, Pi-d2(t)	Pyricularia oryzae resistance-d2
LOC_Os04g49660	2.2298	0.00150992	4.41774	5.29683	5.60015	13.8272	10.3157	10.006		DUF581 domain containing protein, expressed
LOC_Os03g24020	2.23215	0	19.4046	17.1875	21.3433	44.8975	45.8954	38.5279		ribosomal protein L6, putative, expressed
LOC_Os02g52260	2.23426	3.42854e-08	5.88074	5.30775	6.26874	14.0234	12.2664	12.7141		expressed protein
LOC_Os01g55690	2.23433	0.0396667	498.939	737.506	320.656	868.821	1216.03	1394.23	Glua1*, Glua1, GLUA-1, GluA-1, GluA1, Glu19, OsEnS-16	glutelin, putative, expressed
LOC_Os12g35460	2.23493	8.69027e-05	1.54994	1.28133	1.46939	3.39503	3.08661	3.13002		retrotransposon protein, putative, unclassified, expressed
LOC_Os09g29480	2.23588	0.00156765	1.29861	2.0159	1.7605	4.17641	3.47179	3.69888		2-aminoethanethiol dioxygenase, putative, expressed
LOC_Os01g25760	2.23645	0.000174794	1.0987	0.927755	1.18966	2.13942	2.6213	2.43194		powdery mildew resistance protein PM3F, putative, expressed
LOC_Os03g53860	2.23793	0	27.3786	23.4026	26.8661	61.229	54.2635	58.2765		periplasmic beta-glucosidase precursor, putative, expressed
LOC_Os02g40840	2.23801	0.000448473	1.82851	1.69234	1.64391	3.49942	3.65351	4.40582	hwh1	alcohol oxidase, putative, expressed
LOC_Os04g52100	2.2423	3.41216e-12	9.01656	8.5867	9.02791	19.4238	22.089	18.2022		peptidase, M24 family protein, putative, expressed
LOC_Os07g04500	2.24521	0	29.6514	28.0032	29.0532	71.0455	64.5695	59.0626		expressed protein
LOC_Os01g56360	2.24533	6.82432e-12	6.01342	6.01043	6.23313	14.2436	13.8152	12.9341		wax synthase, putative, expressed
LOC_Os10g21560	2.24656	2.19743e-09	3.25341	3.57561	3.63402	8.06715	7.14747	8.29127	ONAC061, ONAC61	no apical meristem protein, putative, expressed
LOC_Os02g09720	2.24782	7.57499e-10	1.89013	1.47868	1.78049	3.94444	3.86233	3.76792	OsABCB9, OsPGP9, OsISC33	multidrug resistance protein, putative, expressed
LOC_Os08g43680	2.24818	6.4831e-11	2.25515	2.27954	2.69301	5.79991	5.53182	4.91744		glutathione S-transferase, C-terminal domain containing protein, expressed
LOC_Os06g49160	2.24961	9.25378e-09	7.73126	8.67131	8.31382	20.472	20.0692	15.0611		thylakoid lumenal 16.5 kDa protein, chloroplast precursor, putative, expressed
LOC_Os08g04450	2.25002	0	23.1026	22.004	23.6517	57.5447	51.7958	45.3669		DAG protein, chloroplast precursor, putative, expressed
LOC_Os04g46010	2.25299	1.80844e-09	4.302	3.64838	4.12253	8.80159	9.95181	8.44672		PPR repeat domain containing protein, putative, expressed
LOC_Os06g14324	2.25733	0.0242094	1.72653	2.06583	2.49176	5.44999	5.48073	3.25458		caleosin related protein, putative, expressed
LOC_Os02g51410	2.25762	0	8.00773	8.47755	7.66044	16.8557	19.4696	18.1866	OsSK1	shikimate kinase, putative, expressed
LOC_Os11g14140	2.25824	0	19.162	19.9612	20.3501	48.3677	46.0262	39.9108	OsKMD4, OsFbox596, Os_F0436	OsFBK25 - F-box domain and kelch repeat containing protein, expressed
LOC_Os11g14190	2.25847	7.97267e-05	3.67053	3.02184	4.17247	7.73877	8.78961	8.00959	ARGOS	ARGOS, putative, expressed
LOC_Os06g06400	2.2595	0.00795746	0.553348	0.658835	0.739625	1.31654	1.58216	1.5114		NBS-LRR type disease resistance protein, putative, expressed
LOC_Os03g63360	2.25996	0.00722489	2.4476	2.9691	2.34617	6.19525	5.98217	5.36635		glutathione S-transferase, putative, expressed
LOC_Os05g04630	2.26025	0	24.6633	26.9985	26.5645	62.5199	60.6564	53.6341	OsAP1	retrotransposon protein, putative, SINE subclass, expressed
LOC_Os03g57349	2.26087	0	17.8758	20.2713	21.0417	49.1058	50.0086	34.7038		expressed protein
LOC_Os08g37650	2.26117	0.000249657	2.19901	1.82311	2.11391	3.95599	4.64366	5.27495		expressed protein
LOC_Os03g17580	2.26154	0	14.4508	15.4382	16.499	40.9293	34.8251	29.1536		ribosomal protein L10, putative, expressed
LOC_Os01g06560	2.26211	3.41216e-12	5.97505	8.23131	6.96014	15.2236	16.1982	16.4593	OsDOG1L-2	transcription factor HBP-1b, putative, expressed
LOC_Os03g45250	2.26275	0	28.3506	36.3572	39.2811	87.2991	77.7922	70.21		2-aminoethanethiol dioxygenase, putative, expressed
LOC_Os01g57690	2.26498	6.72437e-06	4.19825	4.29702	4.68691	10.4524	10.1712	9.23375	OsUCL1	early nodulin 20 precursor, putative, expressed
LOC_Os02g45760	2.26605	0.00023548	2.24107	2.19407	1.67263	4.8229	4.32788	4.68969		chitin-inducible gibberellin-responsive protein 2, putative, expressed
LOC_Os02g31910	2.26618	0.0328942	1.06251	0.881257	1.0837	2.74325	2.2504	1.86713	OsHAK19	potassium transporter, putative, expressed
LOC_Os01g37510	2.26807	2.30489e-05	4.70723	3.83472	4.26223	9.89619	10.0456	9.09898	OsPDF1A	peptide deformylase
LOC_Os06g36210	2.26896	8.87161e-11	9.20884	6.88135	8.85272	21.8886	15.574	19.132	OsAAP12B, AAP12B, OsAAP18, AAP18	amino acid transporter, putative, expressed
LOC_Os01g15970	2.26898	0	22.2361	26.0195	23.9426	61.8102	47.1401	54.8664		expressed protein
LOC_Os02g40260	2.2691	2.40004e-05	3.85945	2.99674	3.19835	8.52671	6.99209	7.29595		uncharacterized protein At4g06744 precursor, putative, expressed
LOC_Os04g56680	2.26981	0.00907965	5.67678	6.11296	4.1228	14.5603	12.4871	9.07093	OsSAUR22	OsSAUR22 - Auxin-responsive SAUR gene family member, expressed
LOC_Os08g14580	2.2711	1.17003e-08	10.5817	7.50927	7.40248	19.8989	17.8572	20.142		haloacid dehalogenase-like hydrolase domain-containing protein 1A, putative, expressed
LOC_Os07g48560	2.27155	0.00172465	5.67311	5.31932	5.15476	12.3601	16.1913	8.1278	OsWOX11, Os WOX11, OsWOX12A	WUSCHEL-related Homeobox gene
LOC_Os01g51840	2.27184	0	6.12573	6.68652	5.79529	13.5598	14.5637	14.1499		IQ calmodulin-binding motif family protein, putative, expressed
LOC_Os04g38850	2.27321	0.00841844	3.73986	3.08914	3.46552	7.51726	8.85934	7.02504		expressed protein
LOC_Os06g37620	2.2771	2.72973e-11	2.83099	3.40664	3.41493	7.2668	6.8358	7.87721	OsPUB47, OsRLCK207	protein kinase family protein, putative, expressed
LOC_Os02g43040	2.27861	0.00165262	1.19923	1.77036	1.53482	3.52304	3.53546	3.2053	OsATG13a	expressed protein
LOC_Os06g34120	2.27865	0	32.9217	29.6848	29.2072	77.6684	67.5342	64.009	OsGELP85	GDSL-like lipase/acylhydrolase, putative, expressed
LOC_Os03g64350	2.28026	1.36486e-10	5.24443	4.68835	4.76868	11.4756	11.6934	10.3543		rhodanese-like domain containing protein, putative, expressed
LOC_Os03g22780	2.28168	0.00427027	2.59552	2.51299	2.22311	6.73287	5.62625	4.36931	OsDVR, DVR	Divinyl Reductase gene
LOC_Os07g42390	2.2835	2.93457e-05	31.7873	27.1885	15.6743	52.4443	53.6547	64.3644	OsEnS-110	DUF581 domain containing protein, expressed
LOC_Os03g61260	2.28663	0	34.8413	40.8838	37.1532	100.968	84.7821	72.361		ribosomal L18p/L5e family protein, putative, expressed
LOC_Os12g03060	2.28715	0	29.0566	29.2952	27.7713	66.1922	65.4206	65.3639		expressed protein
LOC_Os03g01900	2.28892	0	40.757	30.7675	35.7964	89.6918	73.3235	82.6343		40S ribosomal protein S17, putative, expressed
LOC_Os02g06790	2.28981	0.003221	3.813	3.19805	3.69229	9.52712	8.60248	6.37904		expressed protein
LOC_Os12g32470	2.29125	0.00602591	1.61003	1.35881	1.43225	2.98074	3.58459	3.51869		expressed protein
LOC_Os04g47590	2.29163	0	3.76156	3.76223	3.33905	8.53833	8.65422	7.70104		niemann-Pick C1 protein precursor, putative, expressed
LOC_Os06g09610	2.29263	3.20163e-08	11.4164	12.7931	11.4882	32.3934	28.6263	20.8218	OsPrx Q, Prx Q, OsPrxQ, PrxQ	peroxiredoxin, putative, expressed
LOC_Os05g38720	2.29264	2.87645e-09	2.90376	3.0562	3.24109	7.62623	6.89726	6.57123		Lung seven transmembrane receptor domain containing protein, putative, expressed
LOC_Os06g47760	2.29284	0.00845245	1.00783	1.01049	1.15156	2.79062	2.33873	2.1387		phytosulfokine receptor precursor, putative, expressed
LOC_Os06g10650	2.29327	0	26.8489	23.921	26.2562	62.4027	54.5163	59.7229	OsPFA-DSP3	tyrosine phosphatase family protein, putative, expressed
LOC_Os07g47620	2.29362	0	10.0566	8.07934	10.1191	23.4045	19.3646	22.0374	OsUsp1	universal stress protein domain containing protein, putative, expressed
LOC_Os03g16150	2.29642	0	15.3266	19.2969	17.6472	41.5202	38.6582	39.8571	OsMPG3, MPG3, OsVTC1-3, VTC1-3	mannose-1-phosphate guanyltransferase, putative, expressed
LOC_Os01g43372	2.29739	0	11.9202	12.0522	12.3165	30.1687	26.0294	27.1718		expressed protein
LOC_Os03g57500	2.29755	0.000273563	1.68257	2.07242	1.95818	4.67178	4.25605	4.19847	OsRFPH2-19	zinc finger, C3HC4 type domain containing protein, expressed
LOC_Os03g48950	2.29837	7.99438e-07	4.95276	5.27005	6.11259	13.9472	12.8444	10.7533		expressed protein
LOC_Os03g49710	2.29882	0	33.9555	31.4227	29.397	77.6173	77.4348	62.8191		ribosomal protein S13p/S18e, putative, expressed
LOC_Os10g31630	2.30197	6.09051e-05	4.68078	5.8603	4.59146	10.9626	9.71638	14.1557		expressed protein
LOC_Os03g02900	2.30202	0.00526507	1.5805	1.20591	1.79103	3.78337	3.58845	3.16557		B3 DNA binding domain containing protein, expressed
LOC_Os04g20280	2.30246	0	21.4564	19.5168	20.4234	49.1479	44.9524	47.2629	OsPAS2	expressed protein
LOC_Os05g40200	2.30531	0	4.33489	3.49329	4.37206	9.0287	9.10062	9.99599		inactive receptor kinase At2g26730 precursor, putative, expressed
LOC_Os07g43160	2.30821	0.0204976	1.66881	2.3154	1.48867	3.98799	4.2921	4.35247	OsTPP3	uncharacterized glycosyl hydrolase Rv2006/MT2062, putative, expressed
LOC_Os01g66980	2.30906	0.00529661	2.23476	3.21317	2.97903	6.95183	6.59039	5.91617		expressed protein
LOC_Os07g30100	2.30929	0	6.63902	8.04641	7.59217	17.1998	18.1237	16.1219		RIN3, putative, expressed
LOC_Os01g07090	2.31181	9.46495e-07	4.62751	4.20097	4.03823	10.5552	11.1119	8.07829	OsPP2C01, PP2C01, OsPP2C1, PP2C1, OsPP1, OsPBCP, PBCP	protein phosphatase 2C
LOC_Os03g01222	2.31212	3.41216e-11	3.85544	3.89283	3.88016	8.90156	10.3145	7.67033		formyl transferase, putative, expressed
LOC_Os12g02200	2.31248	0	7.34081	7.1646	8.16278	16.1258	18.0203	18.2737	OsCIPK14	calcineurin B-like–interacting protein kinase gene
LOC_Os02g50010	2.31298	0	6.01113	5.98979	7.22355	14.7037	16.4354	13.3267	OsISC41	APO, putative, expressed
LOC_Os02g01100	2.31309	0	21.6631	22.8477	21.7749	50.8827	53.2103	49.2316	OsATL11, OsAux/LAX1, OSLAX1	transmembrane amino acid transporter protein, putative, expressed
LOC_Os07g34950	2.31427	0.0136276	1.87211	1.27744	1.66539	3.79602	4.13473	3.21229		uncharacterized membrane protein, putative, expressed
LOC_Os06g49010	2.31525	0	5.91275	7.14159	6.50717	15.6872	16.1556	13.4469	OsSPL12	OsSPL12 - SBP-box gene family member, expressed
LOC_Os04g37710	2.31527	3.20105e-05	4.90942	5.08076	3.97608	10.7453	10.19	11.4004		serine hydrolase domain containing protein, expressed
LOC_Os08g19670	2.31542	0.00264704	4.04878	3.97374	7.08932	11.7614	12.9509	10.278		expressed protein
LOC_Os02g30380	2.31608	0.036446	2.41479	1.90519	2.60406	6.0167	5.6693	4.35063		expressed protein
LOC_Os01g22900	2.31688	3.41216e-12	3.80285	3.57328	3.84162	8.77166	9.38832	7.83023	OsNIN2, CytINV	neutral/alkaline invertase, putative, expressed
LOC_Os05g37970	2.31698	0	10.5741	14.5589	11.1503	30.4254	24.4313	29.2107		universal stress protein domain containing protein, putative, expressed
LOC_Os05g41970	2.31706	0.000179876	222.297	244.401	120.352	397.051	456.337	506.844	glb1(t)*, glb1(t), glb1, alpha-Glb, Glb-1, OsGlb1, Glb, OsEnS-77	Glb1
LOC_Os11g35420	2.3188	0.021639	1.16566	1.26327	1.23138	3.53751	2.73813	2.2119		expressed protein
LOC_Os11g17930	2.32005	1.46088e-05	3.73498	3.50045	3.18495	8.68332	8.54321	6.94923		expressed protein
LOC_Os07g30170	2.3212	0	10.9609	9.0835	7.97574	20.867	24.9455	19.2279		nitrilase, putative, expressed
LOC_Os07g24190	2.32323	0	21.7834	23.5367	23.1998	52.7553	56.465	49.9672	OsCesA3, OsCESA3, OS_CESA03	CESA3 - cellulose synthase, expressed
LOC_Os10g35770	2.32555	0	19.3614	18.7274	18.8232	44.2974	48.5853	39.4689		E2F-related protein, putative, expressed
LOC_Os11g34940	2.32831	6.7822e-05	13.0409	9.78283	9.92564	31.5042	26.1504	18.5961		plastid-specific 50S ribosomal protein 6, chloroplast precursor, putative, expressed
LOC_Os04g01230	2.32865	0	23.0969	16.0393	18.1496	46.6153	41.8502	44.9333		phosphoglycerate mutase, putative, expressed
LOC_Os02g56250	2.33195	0	13.9124	18.3137	16.4292	40.6319	37.7713	35.0585		GATA zinc finger domain containing protein, expressed
LOC_Os11g48080	2.33204	0.0191592	1.40832	2.33749	2.17126	5.01124	4.86899	3.91863	OsPDX1.3c	SOR/SNZ family protein, putative, expressed
LOC_Os01g67580	2.33252	0	2.7139	2.07694	2.95895	5.55513	6.40788	6.11351	OsABCC2, OsMRP2	multidrug resistance-associated protein, putative, expressed
LOC_Os06g04020	2.33301	0	25.4416	34.7715	29.2975	79.8049	63.6005	65.4236		histone H1, putative, expressed
LOC_Os01g65380	2.33304	0	35.9673	29.5145	31.0014	77.6988	76.9103	70.4902		patellin protein, putative, expressed
LOC_Os01g67220	2.33341	0	14.1377	13.8029	12.4743	29.9857	35.2327	29.0862	Os1bglu4, Os1Bglu4, Os1BGlu4	Cytoplasmic Rice β-Glucosidase
LOC_Os02g09590	2.33655	0	19.1189	18.4137	18.0929	46.3026	47.5149	36.1545		ribosome, putative, expressed
LOC_Os01g60260	2.33807	0	12.3531	11.4877	12.1174	27.455	28.021	28.5967		KH domain containing protein, putative, expressed
LOC_Os05g37690	2.34122	0	11.6177	11.2572	11.8215	25.992	29.0317	26.208	OsCOI1b, COI1b, OsCOI1H, OsFbox260, Os_F0646	F-box protein; coronatine insensitive 1; principal component of a receptor of JA
LOC_Os12g03470	2.34217	0	4.25743	4.13789	4.36516	10.3374	9.77062	9.77913		alpha-N-arabinofuranosidase A, putative, expressed
LOC_Os06g01304	2.34246	0	5.21091	5.31631	4.9187	12.4845	13.1405	10.5564	OsPUB12	spotted leaf 11, putative, expressed
LOC_Os06g39520	2.3449	0	5.39992	5.60401	5.54534	13.5392	13.1994	12.0678		myristoyl-acyl carrier protein thioesterase, chloroplast precursor, putative, expressed
LOC_Os10g04180	2.34614	0	2.94974	3.73798	4.17119	8.4858	8.63549	8.35525		NB-ARC domain containing protein, expressed
LOC_Os08g34900	2.34658	1.58051e-05	2.78993	4.94967	4.62822	11.3611	8.95896	8.70199	OsPME25	pectinesterase, putative, expressed
LOC_Os10g35800	2.34745	0.000236838	4.66025	6.20379	2.95982	9.79829	11.3202	11.3323		expressed protein
LOC_Os01g73110	2.34752	0.00281992	3.75957	8.40491	5.12117	13.4234	13.7608	13.3942		expressed protein
LOC_Os01g69120	2.34867	0	11.6182	10.1229	11.0242	26.3006	26.5682	24.0861		uncharacterized RNA methyltransferase pc1998, putative, expressed
LOC_Os05g35190	2.34986	0	6.34144	6.19561	5.54185	13.9053	14.7783	13.7992	OsTBL27, TBL27	powdery mildew resistant protein 5, putative, expressed
LOC_Os03g01720	2.35263	0.000276263	1.29278	1.68407	1.36566	2.95288	4.03688	3.22653	OsRFP	protein binding protein, putative, expressed
LOC_Os09g04384	2.35304	0.00538291	2.54037	2.39213	3.2203	5.36156	6.49932	7.32303		expressed protein
LOC_Os11g05930	2.35349	0	9.44939	6.90219	7.68197	18.2925	19.4229	18.8473	OsPRR59, Os-PRR59, Prr5, OsPRR5, OsCCT38	response regulator receiver domain containing protein, expressed
LOC_Os08g25700	2.35408	2.17013e-09	3.96351	3.23222	4.05079	9.84515	8.76756	7.86245		expressed protein
LOC_Os06g08090	2.3556	0	8.88725	8.20825	9.83268	22.1711	22.6368	18.6241		heparanase-like protein precursor, putative, expressed
LOC_Os01g70550	2.35564	0.000103552	2.16721	1.83949	2.68026	5.89678	5.42012	4.43517		heparan-alpha-glucosaminide N-acetyltransferase, putative, expressed
LOC_Os04g23700	2.35612	0.0339581	1.10736	0.855845	0.835564	2.24855	2.01904	2.32664		lectin protein kinase family protein, putative, expressed
LOC_Os03g53150	2.35961	0	15.8007	14.4146	15.7238	36.1711	44.1723	28.0549	OsIAA13, OsIAA1, OsiIAA1	rice Aux/IAA gene
LOC_Os12g18110	2.35999	1.76786e-06	3.3852	2.53447	2.81448	6.61538	7.4464	6.55077		PQ loop repeat domain containing protein, expressed
LOC_Os02g22190	2.36122	0	8.36739	7.66571	8.984	19.7138	21.1398	18.2173		glycosyltransferase, putative, expressed
LOC_Os02g49800	2.3615	0	30.8795	34.1293	32.1102	81.226	76.4272	71.6934		eukaryotic aspartyl protease domain containing protein, expressed
LOC_Os05g34310	2.36219	5.38065e-06	5.36321	6.54056	3.73686	11.3919	12.3573	13.1969	NAC94, ONAC024, ONAC24	no apical meristem protein, putative, expressed
LOC_Os10g10170	2.36242	0	3.16625	2.81433	2.98167	7.34824	8.19488	5.62945		PPR repeat domain containing protein, putative, expressed
LOC_Os10g35810	2.36491	0	5.34529	6.3021	4.9676	13.1583	13.9791	12.1555		thylakoid lumenal protein, putative, expressed
LOC_Os10g36848	2.36532	0.0205943	0.950567	1.37832	1.19941	3.05177	2.43944	2.85433	F5H1, OsCAld5H1, CAld5H1, CYP84A5	cytochrome P450, putative, expressed
LOC_Os10g29850	2.36639	0.00413093	0.703684	0.72024	0.760248	1.6716	1.88344	1.61356	OsMB44, MB44	MBTB60 - Bric-a-Brac, Tramtrack, Broad Complex BTB domain with Meprin and TRAF Homology MATH domain, expressed
LOC_Os04g42860	2.36682	0	13.9613	16.705	15.1638	44.5786	32.3409	31.5522	OsGELP56	GDSL-like lipase/acylhydrolase, putative, expressed
LOC_Os04g33150	2.36706	0.00504514	7.56649	12.347	5.29825	15.9477	20.8945	22.8354	OsEnS-64, PCC13-62	desiccation-related protein PCC13-62 precursor, putative, expressed
LOC_Os05g06480	2.36833	9.70965e-05	2.3179	2.57873	1.34139	4.88189	4.87016	5.02166	Chalk5	vacuolar H+-translocating pyrophosphatase;grain chalkiness
LOC_Os02g53200	2.36957	0	65.0655	62.3076	64.6095	164.5	141.627	148.79	Gns9	glucan endo-1,3-beta-glucosidase precursor, putative, expressed
LOC_Os03g55070	2.37082	0	78.7534	75.3428	77.6405	201.039	160.3	188.066		UDP-glucose 6-dehydrogenase, putative, expressed
LOC_Os04g52130	2.37179	0	68.3294	74.9592	74.8432	186.758	169.842	160.763	CPO, CPOX, LLM1	coproporphyrinogen III oxidase
LOC_Os01g74200	2.37379	0.00339292	1.23402	1.62392	1.98641	3.98639	3.49001	4.02308	OsRLCK57	protein kinase domain containing protein, expressed
LOC_Os04g48880	2.37424	5.04214e-06	2.89472	3.0408	2.9372	7.3114	6.2257	7.52886	OsBCH2, OsHYD1	fatty acid hydroxylase, putative, expressed
LOC_Os08g13430	2.37447	0.0467024	0.791076	0.897223	0.74533	1.99836	1.97527	1.80495		expressed protein
LOC_Os10g26060	2.37647	0.00128367	356.074	470.037	217.174	616.933	895.561	966.837	Glua2*, Glua2, GLUA-2, GluA-2, Glu20, GluA2, OsEnS-137	glutelin gene
LOC_Os05g24684	2.37732	0	3.99776	4.53685	4.37623	10.2813	10.1038	10.3081	OsMed5_1, Med5_1	structural constituent of ribosome, putative, expressed
LOC_Os11g09010	2.3819	0	4.21268	3.63099	3.46645	8.53449	9.25158	9.15344	PAD4, OsPAD4	phytoalexin deficient 4
LOC_Os03g01020	2.38221	1.05777e-10	7.40911	5.98496	5.83173	17.5572	15.0809	13.1617		pectinesterase inhibitor domain containing protein, putative, expressed
LOC_Os12g01210	2.38315	0.00128873	1.14234	1.14584	1.25501	3.14573	2.92258	2.37565		etiolation gene
LOC_Os12g02520	2.38396	0.00554432	2.13295	1.48141	2.09225	3.90452	4.56294	5.13688		OsMan09 - Endo-Beta-Mannanase, expressed
LOC_Os02g32840	2.38463	5.31505e-06	6.93539	5.8903	7.63813	18.3895	14.3818	16.0273	OsSAP5	zinc finger A20 and AN1 domain-containing stress-associated protein, putative, expressed
LOC_Os02g10600	2.38538	7.77972e-10	1.88394	2.23875	1.95642	4.78163	5.47862	4.24072	OsFbox071, OsFbox71, Os_F0306	OsFBA1 - F-box and FBA domain containing protein, expressed
LOC_Os01g59350	2.38653	0	15.1021	10.7728	11.6453	30.7855	30.3573	28.4007	OsbZIP08, OsbZIP8	bZIP transcription factor
LOC_Os02g48470	2.38818	0.00015055	6.017	7.30678	7.75673	16.6042	19.7757	13.9642		expressed protein
LOC_Os10g39010	2.39075	0	1.82829	2.226	2.49941	5.33226	5.10747	5.22851	OsCrRLK1L16	TKL_IRAK_CrRLK1L-1.16 - The CrRLK1L-1 subfamily has homology to the CrRLK1L homolog, expressed
LOC_Os09g30478	2.39243	0	23.9391	25.1525	23.2337	55.6995	58.8052	58.5288		expressed protein
LOC_Os04g40730	2.39339	0	28.7923	32.834	31.3384	86.0994	66.1079	70.2932	KCR1, OsKCR1	oxidoreductase, short chain dehydrogenase/reductase family, putative, expressed
LOC_Os02g41904	2.39362	0.00588258	152.913	52.652	80.161	205.115	220.728	258.079	OsCPT1, CPT1, DEFL7, OsDEFL7, OsDf-07, Df-07, OsPR12, PR12	DEF7 - Defensin and Defensin-like DEFL family, expressed
LOC_Os03g21900	2.39546	0	17.6179	14.4752	13.304	39.7355	37.6244	31.3872	UroD	uroporphyrinogen decarboxylase, putative, expressed
LOC_Os01g21320	2.39727	0	16.3316	16.3043	15.4225	40.2569	39.1276	35.8248	OsUXS2, UXS-2	NAD dependent epimerase/dehydratase family domain containing protein, expressed
LOC_Os06g02580	2.39792	9.53921e-06	3.7871	2.82858	4.43309	10.2182	9.07516	7.20066	ZN, OsZN	high-affinity nickel-transport family protein, putative, expressed
LOC_Os04g57320	2.39853	1.50135e-10	2.9159	3.28904	3.20601	8.25334	7.73314	6.58597	OsIM1, OsIM1a, OsIM2, OsIM, PTOX1	AOX homologous gene
LOC_Os11g24070	2.39867	4.11404e-08	14.7001	14.419	15.1759	42.307	39.0628	24.8795	OsLTP1.14, OsLtpI.14	LTPL10 - Protease inhibitor/seed storage/LTP family protein precursor, expressed
LOC_Os03g51650	2.39875	0	13.7229	12.2183	12.2871	30.1215	31.8781	29.7004		membrane protein, putative, expressed
LOC_Os12g25690	2.39881	0	45.886	39.4331	39.088	107.32	96.3559	94.7529		UDP-glucose 6-dehydrogenase, putative, expressed
LOC_Os02g26810	2.399	0	9.34949	10.5813	9.99592	28.5299	23.2281	20.0362	C4H1, OsC4H	cytochrome P450, putative, expressed
LOC_Os01g54540	2.40026	0	41.0169	37.9004	36.983	99.7779	97.7432	80.67	cp rpl13, cp RPL13, WLP1, RPL13	ribosomal protein L13, putative, expressed
LOC_Os01g48690	2.40272	0	24.0757	22.3643	20.8379	59.1189	55.4582	47.0734		ribosomal protein rpS20, putative, expressed
LOC_Os01g03950	2.40341	0	50.1564	33.8771	41.7387	107.894	99.6277	94.7594		glycosyl hydrolase, family 31, putative, expressed
LOC_Os02g46620	2.40404	4.03428e-05	3.46006	3.76633	3.53909	9.71473	8.41957	7.74639		expressed protein
LOC_Os08g33350	2.40584	0.0136327	2.41545	1.96773	1.71844	5.00377	4.85448	4.82125		expressed protein
LOC_Os06g03640	2.40829	0	3.52175	4.04154	4.2276	10.5647	9.42613	8.40507	OsBAG3	BAG domain containing protein, expressed
LOC_Os03g07890	2.40896	0	6.2947	6.88209	7.21629	19.1227	16.1219	13.8816		mitochondrial carrier protein, putative, expressed
LOC_Os02g17680	2.40912	0.00340736	1.48563	1.54774	1.51333	2.90618	4.57868	3.46865	OsbHLH072	ethylene-responsive protein related, putative, expressed
LOC_Os10g22100	2.41286	5.02415e-06	1.79927	1.65744	1.9007	3.88785	4.3384	4.70043		expressed protein
LOC_Os01g52500	2.41345	0	20.8322	16.1862	19.4494	48.4085	44.47	43.4037	OscytME1	NADP-malic enzyme gene
LOC_Os04g50110	2.41475	0.00338255	3.52856	2.73982	3.1705	8.60072	9.26467	4.92714		RNA recognition motif containing protein, putative, expressed
LOC_Os04g55410	2.41614	0	5.59741	4.89624	5.4441	12.5397	12.7674	13.2008		FGGY family of carbohydrate kinases, putative, expressed
LOC_Os09g36600	2.41893	0	11.2801	10.7881	13.3357	30.7472	25.5409	29.3514	OsMFS5	nodulin, putative, expressed
LOC_Os07g46410	2.42463	0	7.30633	6.92656	7.27537	16.3713	18.453	17.3253	OsNTRC, NtrC, OsGRL15	rice chloroplast NADPH thioredoxin reductase
LOC_Os04g52780	2.42594	0.00424241	0.584374	0.526918	0.793694	1.692	1.52558	1.40379	Os-FLS2, FLS2, OsFLS2	leucine-rich repeat receptor protein kinase EXS precursor; flg22 Receptor
LOC_Os01g58470	2.42639	3.10658e-06	6.09942	4.65661	5.49263	14.8729	14.5673	9.98541		expressed protein
LOC_Os04g59330	2.42913	0	19.8665	21.8284	19.8904	59.0103	48.2189	42.3696		expressed protein
LOC_Os05g39140	2.42984	1.38155e-06	1.44048	1.593	1.25933	3.72744	3.3283	3.37512		expressed protein
LOC_Os11g37040	2.43364	0.00107698	0.883818	0.659294	0.917818	1.68618	2.18999	2.11284		expressed protein
LOC_Os01g39270	2.43664	0	8.02289	6.33077	6.72332	16.802	16.8819	17.6731	OsGLYR2	NAD binding domain of 6-phosphogluconate dehydrogenase containing protein, expressed
LOC_Os01g65630	2.43912	2.67159e-06	3.93959	4.56285	4.545	9.89841	11.9463	9.97963		expressed protein
LOC_Os03g17240	2.44111	0	4.48147	5.0477	4.9719	11.4759	12.6729	11.25		ankyrin repeat-containing protein, putative, expressed
LOC_Os06g44410	2.44118	1.49847e-06	1.71267	3.16296	2.37952	5.79992	6.1424	5.76882	OsHK1, OHK1	histidine kinase, putative, expressed
LOC_Os01g67310	2.4435	0.00406742	1.93768	2.26162	1.93918	3.9973	6.55738	4.44474	OsEnS-20, OspPLAIIalpha, pPLAIIalpha, PAT2, PAT	patatin, putative, expressed
LOC_Os01g09280	2.44373	0	8.34118	8.09526	9.30289	22.6443	20.3779	19.8777		myb-related transcription activator, putative, expressed
LOC_Os09g13600	2.44569	0.00584419	2.64633	2.58548	3.30379	7.97884	7.57151	5.32507		expressed protein
LOC_Os03g13860	2.44612	0.000369983	1.90685	1.83519	1.26272	3.74703	4.30523	4.18998		ras-related protein, putative, expressed
LOC_Os04g51454	2.44738	0.000427732	5.45491	4.91326	6.22342	13.5961	12.1837	14.8261		expressed protein
LOC_Os05g40220	2.44975	0	8.2616	7.77221	7.71582	18.7994	21.5679	17.8134		transposon protein, putative, unclassified, expressed
LOC_Os02g36590	2.45343	8.23386e-05	1.7444	1.02857	1.42211	3.73497	2.88747	3.66987	IIP3	CPuORF19 - conserved peptide uORF-containing transcript, expressed
LOC_Os02g42380	2.45504	0.0107496	2.39443	2.29434	2.63705	7.16816	6.56868	4.2484	OsTCP7, CHE, TCP7	TCP family transcription factor
LOC_Os03g47070	2.45505	3.19815e-06	3.0398	2.18391	2.34662	6.46261	6.70639	5.4165	OsOSCA2.2, OsIOSCA2.2, OsDDP3, DDP3, OsDDP3.1, OsDDP3.2	RXW8, putative, expressed
LOC_Os03g08360	2.4584	0	85.61	83.9459	93.609	247.774	193.871	205.319	ONI1	3-ketoacyl-CoA synthase 10, putative, expressed
LOC_Os07g39520	2.46115	0.00527276	2.00639	1.46121	1.75266	4.73093	4.7007	3.41622	OsWNK5	STE_PAK_Ste20_Slob_Wnk.5 - STE kinases include homologs to sterile 7, sterile 11 and sterile 20 from yeast, expressed
LOC_Os12g23280	2.46381	1.93128e-09	5.80478	6.14073	6.04971	17.9324	13.329	13.0753		heavy metal-associated domain containing protein, expressed
LOC_Os01g61690	2.4657	7.88683e-07	2.83463	2.08691	1.99628	5.92262	5.52846	5.60622	OsSCP5	OsSCP5 - Putative Serine Carboxypeptidase homologue, expressed
LOC_Os04g45330	2.466	0	17.286	16.5789	20.3828	47.1547	45.3397	41.2806	OsYABBY5, OsYAB3, YAB3, Os YABBY5, TOB1	YABBY gene
LOC_Os11g25780	2.46863	1.11322e-06	4.05971	3.87821	4.62213	11.5149	10.8535	8.63775	OsPB1, PB1	PB1 domain containing protein, expressed
LOC_Os09g33940	2.46906	0.00297787	1.50509	1.47152	1.04414	2.6189	3.26131	4.04724		expressed protein
LOC_Os12g39710	2.46914	5.613e-09	2.07484	1.56269	2.06774	4.48526	5.04756	4.5543		expressed protein
LOC_Os02g55120	2.46993	0	7.76607	6.54158	7.65433	17.7387	18.2964	18.2094		translation initiation factor IF-3, putative, expressed
LOC_Os01g59870	2.47002	0	14.7438	11.8552	14.6667	40.4886	30.0912	31.3476	OsLTPG1, OsLTPg1	LTPL65 - Protease inhibitor/seed storage/LTP family protein precursor, expressed
LOC_Os09g36300	2.47024	0	10.1396	10.1851	9.98057	25.2789	24.6263	24.9564	OsLon1, LON1, OsLonP4, LONP4, LON2	OsLonP4 - Putative Lon protease homologue, expressed
LOC_Os04g38640	2.47038	0.0104567	1.55913	1.22233	1.12138	3.50065	2.89637	3.24447	OsDegp5, DEGP5, OsDeg8	OsDegp5 - Putative Deg protease homologue, expressed
LOC_Os02g51610	2.47071	0	6.9959	6.97768	6.82423	14.092	17.8621	19.4312		CRAL/TRIO domain containing protein, expressed
LOC_Os01g54910	2.47071	0	18.5823	15.483	16.2247	39.7438	41.4314	43.077		GTP-binding protein typA/bipA, putative, expressed
LOC_Os02g10860	2.47081	3.26907e-05	3.1708	3.40501	3.12991	7.52274	9.34075	7.11747		bZIP transcription factor
LOC_Os11g35410	2.47224	1.85125e-05	1.08651	1.21633	1.29123	3.34413	2.4302	3.11106		expressed protein
LOC_Os05g46240	2.47393	0	9.20243	8.09233	7.71308	21.2762	20.2644	20.327	OsRTH2	Reversion-To-ethylene Sensitivity1
LOC_Os05g28520	2.4747	1.86831e-05	1.44903	1.48312	1.47969	3.66502	4.04556	3.20738		MRH1, putative, expressed
LOC_Os05g06660	2.47519	1.5449e-06	2.40551	1.95167	2.54111	6.01446	5.98629	5.07384	OsSCP26, SCP26	regulator of grain size
LOC_Os07g07530	2.47827	1.15157e-06	2.37387	2.22725	1.6718	4.77157	5.53739	5.23704		expressed protein
LOC_Os09g30360	2.47881	0.00080675	3.80899	2.75196	2.66276	9.00732	7.05168	6.80485		caffeoyl-CoA O-methyltransferase, putative, expressed
LOC_Os02g13960	2.48245	0	4.89667	4.99448	5.26252	13.7556	12.1348	11.7278	OsPUB4	spotted leaf 11, putative, expressed
LOC_Os03g21370	2.48255	0	36.3192	36.2443	37.5767	101.721	95.1099	76.5972	OsLCAA	expressed protein
LOC_Os05g07820	2.48267	3.41216e-12	1.85055	1.78788	2.06449	5.12758	4.81101	4.21988		leucine-rich repeat receptor protein kinase EXS precursor, putative, expressed
LOC_Os01g69290	2.48384	0	6.24116	7.72282	7.34743	18.9735	17.3696	16.591		antifreeze glycoprotein, putative, expressed
LOC_Os05g49410	2.48697	0	9.90719	9.45281	8.51447	25.0611	24.1652	20.0968		expressed protein
LOC_Os01g08320	2.4878	2.34583e-07	5.80358	7.08572	5.03597	17.7481	15.0247	11.8218	OsIAA1, OsIAA4	Auxin-responsive Aux/IAA gene
LOC_Os01g50622	2.48793	2.11554e-09	3.49967	4.29841	3.55613	8.91033	10.8282	8.5099	OsBBD1	DNA-binding protein DSP1, putative, expressed
LOC_Os09g23370	2.48831	0.000110149	3.07153	3.45303	2.60639	8.40056	6.4923	7.82776		proline-rich protein 6, putative, expressed
LOC_Os01g71094	2.48905	1.19172e-06	2.79505	3.70697	3.24372	7.79421	8.03335	8.43004		basic 7S globulin 2 precursor, putative, expressed
LOC_Os02g33420	2.48907	0.00028218	0.873401	1.13776	1.21621	2.37401	3.02289	2.63625		ATPase, AAA family protein, expressed
LOC_Os03g51200	2.49031	4.07241e-08	6.49554	6.74071	7.52884	17.5897	17.3107	16.8111		Core histone H2A/H2B/H3/H4 domain containing protein, putative, expressed
LOC_Os03g03020	2.49363	0	20.4902	20.0984	19.9543	57.2208	52.4396	41.3112		L11 domain containing ribosomal protein, putative, expressed
LOC_Os12g19304	2.49416	0	5.89036	4.44348	4.82292	12.905	12.581	12.3173		Fe-S metabolism associated domain containing protein, expressed
LOC_Os03g06570	2.49448	1.86338e-08	4.02609	3.18098	3.13384	9.58335	8.06735	8.14446		IQ calmodulin-binding motif family protein, putative, expressed
LOC_Os06g02019	2.49553	0.000804795	2.20877	2.43922	2.88592	8.23685	6.22572	4.33851	OsKAO, kao, CYP88A5, OSKAO, Os KAO, RPE1	cytochrome P450, putative, expressed
LOC_Os09g29460	2.49592	0	15.7054	14.7329	15.9136	44.2193	35.1436	36.3278	Oshox4, OsHox4	Homeodomain transcription factor HOX4
LOC_Os02g32590	2.49848	5.34023e-07	1.68936	1.51629	2.05915	4.38826	4.56483	4.20091	HSfA3, OsHsfA3, OsHsf-07, HSF07	heat shock transcription factor gene
LOC_Os03g53845	2.49891	1.86645e-09	12.0954	9.6032	12.2997	31.8105	27.4287	25.7197		expressed protein
LOC_Os01g67530	2.49957	0.000695104	1.87276	1.45908	1.12204	4.04524	3.49046	3.5971	OsACS5, ACS5	AMP-binding enzyme, putative, expressed
LOC_Os04g44650	2.49963	0.0465698	1.93897	1.98459	1.91172	4.9367	4.65883	4.99052		ferredoxin-thioredoxin reductase, variable chain, putative, expressed
LOC_Os01g56890	2.50285	0	10.3867	9.74319	8.71838	27.6877	22.0422	22.4729		expressed protein
LOC_Os02g52190	2.50308	0.00094902	1.899	1.7709	2.18437	5.25905	5.44107	3.95356	OsbHLH048	helix-loop-helix DNA-binding protein, putative, expressed
LOC_Os01g26070	2.50326	1.68958e-05	8.17329	9.11756	6.20876	23.0739	19.2063	16.5455		expressed protein
LOC_Os01g48040	2.50767	9.75229e-08	1.89664	1.7706	1.78339	4.65018	4.14733	4.87084		S-locus-like receptor protein kinase, putative, expressed
LOC_Os03g49600	2.50782	0	152.836	146.908	165.209	392.792	389.52	383.707	Os3bglu7, Os3BGlu7, 3BGLU7, BGlu7, BGlu1, bglu1	Rice β-Glucosidase
LOC_Os08g23410	2.50815	0.000532679	2.44573	3.07419	2.81024	8.58146	7.18765	5.12421	OsISC42	rubredoxin family protein, putative, expressed
LOC_Os02g22260	2.50897	0	11.5201	8.67201	9.30408	27.666	26.8594	19.4797		fruit protein PKIWI502, putative, expressed
LOC_Os05g04820	2.50949	2.95998e-06	1.11684	1.49841	1.68998	3.86788	3.98383	2.95221	R2R3-MYB, OsMYB55/61-L	R2R3 MYB Transcription Factor
LOC_Os07g39220	2.50986	0	9.04236	9.05035	8.4532	23.2421	22.7473	20.637	OsBZR1, Os BZR1	dwarf; BR-signaling factor
LOC_Os05g47780	2.51271	0	8.59632	9.21656	8.88681	22.8607	22.5335	21.6943	OsRFPH2-24, OsHRZ2, HRZ2	E3 ubiquitin ligase, putative, expressed
LOC_Os07g44550	2.51332	1.79377e-08	33.294	18.8801	21.3624	74.2462	59.5109	51.0637	prx107	peroxidase precursor, putative, expressed
LOC_Os09g31478	2.51423	1.02365e-11	9.7068	5.6356	7.32072	20.9899	17.3964	18.594	OsPILS1, PILS1	auxin efflux carrier component, putative, expressed
LOC_Os09g13920	2.51705	0.00905374	2.30861	1.63588	2.01667	5.39893	5.99472	3.61086		expressed protein
LOC_Os06g38320	2.51917	0	3.7823	3.9013	4.21234	10.3725	10.3887	9.20664		expressed protein
LOC_Os09g07660	2.51958	0.00597084	0.747826	0.765421	0.855816	2.23386	2.04569	1.68951		Activity of bc1 complex
LOC_Os03g07750	2.52439	0	3.6791	4.08325	3.76945	9.13255	10.4405	9.53773		expressed protein
LOC_Os04g32670	2.5337	0	4.70118	5.21957	4.88204	12.1923	12.6804	12.6331		exostosin family domain containing protein, expressed
LOC_Os12g03740	2.5337	0.00123625	2.35105	1.426	2.20764	5.6446	5.21579	4.30304	OsFbox640, Os_F0395	OsFBX438 - F-box domain containing protein, expressed
LOC_Os10g36390	2.53443	6.82432e-12	4.5768	3.44644	4.76575	11.0066	11.9151	9.49114		monocopper oxidase, putative, expressed
LOC_Os01g47810	2.53511	0.000385107	0.990108	1.03753	1.04592	2.34554	2.75233	2.69396		S-locus-like receptor protein kinase, putative, expressed
LOC_Os02g36340	2.5352	0	7.43601	6.58372	7.80702	17.1245	18.1092	20.1016		riboflavin biosynthesis protein ribAB, chloroplast precursor, putative, expressed
LOC_Os01g01470	2.53657	0.000666123	5.13084	5.5844	2.78638	8.09803	13.3161	12.8338	ONAC020, ONAC20	no apical meristem protein, putative, expressed
LOC_Os02g35950	2.53752	0	64.6612	71.4021	72.8097	171.934	177.202	180.883		RNA recognition motif containing protein, putative, expressed
LOC_Os02g51390	2.5414	1.83131e-08	1.74045	2.19604	1.56913	4.58408	5.43804	3.96984		expressed protein
LOC_Os02g51790	2.54208	0	9.24973	7.39833	7.21514	21.3935	21.6422	17.6266		ribosomal protein L29, putative, expressed
LOC_Os06g11730	2.54452	8.79238e-06	2.07061	2.25178	1.60633	5.26754	5.28827	4.52994	RBP-157	RNA recognition motif containing protein, putative, expressed
LOC_Os07g11630	2.5459	0.00504794	17.4818	18.7139	8.47126	24.4201	43.3123	45.9855	LTPL163	LTPL163 - Protease inhibitor/seed storage/LTP family protein precursor, expressed
LOC_Os08g45060	2.54637	1.47566e-05	1.40627	1.7767	1.81051	5.23373	3.65849	3.82305		protein Kinase-like protein TMKL1 precursor, putative, expressed
LOC_Os05g13580	2.54783	1.0469e-06	4.52758	5.19243	4.84044	14.7474	12.073	10.2772	OsCML18	calmodulin
LOC_Os07g14850	2.54848	0	22.5782	20.1225	23.4747	56.7012	58.4741	53.4712	OsCesA6, OsCESA6, OS_CESA06	CESA6 - cellulose synthase, expressed
LOC_Os12g32280	2.54852	8.33386e-08	9.01058	8.16857	9.06529	26.0462	23.6103	17.2279		SWIB/MDM2 domain containing protein, expressed
LOC_Os06g24704	2.54903	0	3.15434	2.96933	3.38081	9.09401	7.71386	7.41939	ACX3, OsACX3	rice acyl-CoA oxidase gene
LOC_Os05g07740	2.54954	3.9751e-07	1.20682	1.32241	1.39484	3.52448	3.81979	2.6603		receptor-like protein kinase 2 precursor, putative, expressed
LOC_Os12g39860	2.54969	0	79.6049	61.7214	68.2766	173.667	173.937	186.817	OsAPT1, APRT, APT1	phosphoribosyl transferase, putative, expressed
LOC_Os01g48830	2.54976	0	2.58678	2.54525	2.94397	7.41149	6.48572	6.69465		expressed protein
LOC_Os09g21740	2.54991	1.13625e-09	2.40807	2.11262	2.28425	6.27264	5.46331	5.61604	OsPUB18	armadillo/beta-catenin repeat family protein, putative, expressed
LOC_Os11g35425	2.55173	0.00222472	2.50785	3.85029	2.44008	8.4899	7.37022	6.5906		expressed protein
LOC_Os01g15979	2.55206	0	21.5498	19.6815	18.632	53.7117	47.7282	51.3349		gb protein, putative, expressed
LOC_Os08g25720	2.55388	0	165.596	161.267	184.984	445.045	398.61	463.54	OsPFPA3, PFPA3	pyrophosphate--fructose 6-phosphate 1-phosphotransferase subunit alpha, putative, expressed
LOC_Os09g32640	2.55477	2.21142e-07	3.54511	3.80339	4.33153	11.5902	9.32309	8.92654		dehydrogenase, putative, expressed
LOC_Os01g11240	2.55761	0	104.964	93.364	91.9475	270.78	218.6	253.029		DUF538 domain containing protein, putative, expressed
LOC_Os03g16740	2.55908	0	4.75387	5.11467	4.64815	12.7777	11.9199	12.4518	OsRLCK107	protein kinase APK1A, chloroplast precursor, putative, expressed
LOC_Os07g36410	2.55966	0	18.6955	17.9638	19.9327	49.6402	52.2579	42.9585		expressed protein
LOC_Os02g10480	2.56018	0	6.41404	4.92372	5.47495	14.3601	14.6806	14.0027		ARF-GTPase-activating protein
LOC_Os03g51080	2.56076	0	8.86693	6.33178	7.84197	23.1076	15.8321	20.0619		glutamate decarboxylase, putative, expressed
LOC_Os05g07650	2.56119	0	13.6702	11.6796	13.272	33.0613	32.2976	33.5588		transmembrane 9 superfamily member, putative, expressed
LOC_Os03g07300	2.56238	0	7.05749	7.27186	6.45798	21.1364	18.7633	13.3652	RPE	ribulose-phosphate 3-epimerase, chloroplast precursor, putative, expressed
LOC_Os04g58850	2.5624	0	15.3401	14.9673	18.2746	43.4655	42.6947	38.3261		harpin-induced protein 1 domain containing protein, expressed
LOC_Os01g61990	2.56378	1.7533e-06	2.09766	1.93698	2.31225	4.17054	5.78703	6.31442	OsNPR4, NPR4	ankyrin repeat-containing protein, putative, expressed
LOC_Os03g63330	2.56433	0	23.8034	22.0218	25.174	61.4768	58.2864	62.3026		aspartokinase, chloroplast precursor, putative, expressed
LOC_Os10g17489	2.56453	6.19648e-09	3.74867	3.24149	2.90172	9.84093	7.80846	7.71867		UDP-glucoronosyl and UDP-glucosyl transferase domain containing protein, expressed
LOC_Os10g36180	2.56563	0.00322713	3.37768	8.03177	3.5681	13.3385	11.8462	13.2422		expressed protein
LOC_Os05g32220	2.56784	0	26.8205	23.7213	25.6413	69.6636	70.2644	55.698		L1P family of ribosomal proteins domain containing protein, expressed
LOC_Os04g38750	2.56846	3.41216e-12	14.5579	15.2202	13.8605	46.3418	36.4103	29.3321		plastid-specific 30S ribosomal protein 3, chloroplast precursor, putative, expressed
LOC_Os06g20200	2.56847	6.40769e-08	2.17141	2.28885	1.95146	5.40692	5.88966	5.17171		gibberellin receptor GID1L2, putative, expressed
LOC_Os03g58850	2.56911	3.59683e-07	5.25601	4.45947	3.94507	10.8428	12.0063	12.2463		uncharacterized PE-PGRS family protein PE_PGRS3 precursor, putative, expressed
LOC_Os04g35760	2.57283	0.0088353	1.88723	1.88452	1.945	5.92141	5.3274	3.45939		expressed protein
LOC_Os05g41640	2.57442	0	13.1283	11.4579	11.7802	34.6374	33.8553	25.1293	OsPGK3, OsPGK3a, OsPGK3b, OsPGK3c	phosphoglycerate kinase protein, putative, expressed
LOC_Os07g03180	2.57474	0	16.4506	18.118	16.1225	49.5365	38.8003	42.1795		GCRP3 - Glycine and cysteine rich family protein precursor, expressed
LOC_Os01g60860	2.57556	0	4.13068	3.16513	4.57815	11.6829	9.46434	9.43479	OsPUB3, PUB3	spotted leaf 11, putative, expressed
LOC_Os04g58840	2.57558	0	9.28406	11.3426	12.8687	32.4416	26.397	27.4313		Eukaryotic aspartyl protease domain containing protein, expressed
LOC_Os03g27080	2.5758	0	9.58658	8.8478	9.3308	19.2221	23.1959	29.0995		calmodulin-binding transcription activator 2, putative, expressed
LOC_Os02g36940	2.57628	2.3407e-05	4.21962	5.23349	3.72332	14.1693	11.0374	8.73948	OsFWL2	uncharacterized Cys-rich domain containing protein, putative, expressed
LOC_Os03g18200	2.57938	0	2.22476	2.61445	2.07164	6.19435	6.55851	5.07289	OsERdj3A, TMS1	heat shock protein DnaJ, putative, expressed
LOC_Os02g01140	2.58037	0.00914882	1.38146	1.41397	2.59946	4.42552	4.29522	5.20009	OsGELP29	GDSL-like lipase/acylhydrolase, putative, expressed
LOC_Os01g04930	2.58054	0	3.10069	3.3382	3.15417	8.77166	8.48779	7.49581		MYB family transcription factor, putative, expressed
LOC_Os09g36220	2.581	0	16.8543	17.6233	20.3754	45.1246	46.8075	49.6436	OsPRR95, Os-PRR95, Prr2, OsPRR2, OsCCT33	pseudo-response regulator 95
LOC_Os04g58280	2.58382	0	56.2087	73.6954	69.2964	173.683	166.659	174.356		stem-specific protein TSJT1, putative, expressed
LOC_Os02g46440	2.58446	0.000830324	1.84165	2.08876	2.36611	6.35306	5.15436	4.76566		expressed protein
LOC_Os05g43530	2.58505	0	4.52311	4.84688	4.14999	12.1862	12.073	10.6906	OsCslC7, OsCSLC7	CSLC7 - cellulose synthase-like family C, expressed
LOC_Os02g38020	2.58546	0.000885481	1.05728	0.706713	0.866153	2.14686	2.40966	2.24362	OsPT14	inorganic phosphate transporter 2-1, chloroplast precursor, putative, expressed
LOC_Os04g44820	2.58616	0	11.8701	12.8545	15.5808	36.5524	35.0592	32.6244	OsRDCP1	rice RING domain-containing E3 ubiquitin ligase
LOC_Os10g39930	2.58657	1.34439e-09	2.39038	2.14423	2.97909	6.5323	6.65327	6.24913	CYP97C2	cytochrome P450 97B2, putative, expressed
LOC_Os03g30740	2.58746	3.56434e-08	4.53082	2.7582	2.75287	8.60117	8.38801	8.99378		expressed protein
LOC_Os08g43160	2.58749	0	4.31047	3.32362	3.73384	9.76167	9.91931	9.73339	PCF2, OsPCF2	TCP family transcription factor
LOC_Os02g44290	2.58924	1.99438e-05	2.17787	2.12779	2.02178	6.73223	4.62314	5.02788		phosphatase, putative, expressed
LOC_Os09g32510	2.5897	0	21.8484	19.902	19.5442	55.4457	51.1594	52.1296	OsbHLH092	BHLH transcription factor, putative, expressed
LOC_Os03g63870	2.59244	0	5.33578	5.69078	5.84973	15.1639	15.523	13.0639		expressed protein
LOC_Os10g39230	2.59417	0	1.59312	1.47022	1.93124	4.16028	4.48101	4.31548		tRNA-splicing endonuclease positive effector-related, putative, expressed
LOC_Os02g15900	2.5946	0	28.7473	26.4867	28.439	80.3827	75.3208	61.3942		50S ribosomal protein L21, chloroplast precursor, putative, expressed
LOC_Os03g59640	2.59594	0	9.92814	5.57814	7.85472	20.9962	21.4886	18.159	OsChlD, ChlD, YGL98, Ygl7	Chlorina-1; yellow-green leaf 7; magnesium-chelatase ChlD protein
LOC_Os06g44620	2.59782	0	2.67133	2.90686	2.30209	7.164	6.82293	6.48465	Os4CL4	4-Coumarate:Coenzyme A Ligase
LOC_Os01g18240	2.59964	0.0181922	0.806009	0.61873	0.957878	2.10108	2.14802	1.94485	OsMYB55/61, OsMYB55, MYB55, OsMYB61, MYB61	MYB family transcription factor
LOC_Os04g35130	2.601	0	11.7969	11.8755	11.6745	35.5684	27.4741	28.8949		expressed protein
LOC_Os01g37910	2.60224	5.00455e-06	1.68003	1.66318	1.57108	4.09659	4.97709	3.71444	OsVPE2, OsaLeg1	vacuolar processing enzyme
LOC_Os06g08720	2.60346	0	2.95154	2.2051	2.38966	6.12758	7.08667	6.43222	OsSCP32	OsSCP32 - Putative Serine Carboxypeptidase homologue, expressed
LOC_Os01g70180	2.60417	4.29932e-10	4.3282	6.27109	4.86909	15.7332	13.5249	11.0242		exostosin family domain containing protein, expressed
LOC_Os04g32980	2.60426	4.11309e-05	1.66842	1.64879	1.33705	4.45217	4.32223	3.34649		protein binding protein, putative, expressed
LOC_Os10g03550	2.60779	0	6.65998	6.45056	8.09704	18.7963	20.0424	16.4663		expressed protein
LOC_Os04g02510	2.60901	2.47864e-06	1.78765	1.99605	2.54079	6.36984	5.34569	4.7851		ZOS4-01 - C2H2 zinc finger protein, expressed
LOC_Os03g06580	2.61067	0	8.24831	8.02025	7.62414	23.6671	19.0928	19.6161		MTN26L2 - MtN26 family protein precursor, expressed
LOC_Os04g49000	2.61085	7.35303e-07	2.54234	2.55569	3.06933	6.57026	7.78936	6.96413		zinc finger, C3HC4 type domain containing protein, expressed
LOC_Os02g32469	2.61191	0	18.9232	21.516	22.9593	61.1925	59.4436	44.955		expressed protein
LOC_Os07g04690	2.61224	0	38.5788	34.0995	36.7414	97.8309	99.5146	88.485		UDP-arabinose 4-epimerase 1, putative, expressed
LOC_Os07g11410	2.61385	0.00273841	12.6946	18.5619	7.26391	23.5422	40.659	36.4854	RA5B, OsEnS-99	RAL5 - Seed allergenic protein RA5/RA14/RA17 precursor, expressed
LOC_Os02g20934	2.61508	0	4.48051	3.90485	5.38917	11.681	13.151	11.1894		expressed protein
LOC_Os06g14370	2.61684	0.0283315	1.28216	1.18929	1.01583	2.69799	3.45764	2.97002		caleosin related protein, putative, expressed
LOC_Os04g05050	2.61743	0	5.31685	4.83469	5.6889	15.6407	14.8963	10.9241		pectate lyase precursor, putative, expressed
LOC_Os09g09320	2.61757	0.0100026	1.63929	1.56346	1.25942	4.94255	3.66897	3.06851		nuclear transport factor, putative, expressed
LOC_Os04g33520	2.61779	0.000551859	1.3295	2.13836	1.44457	4.12304	4.43493	4.30177		RCLEA6 - Root cap and Late embryogenesis related family protein precursor, expressed
LOC_Os05g34270	2.62212	0	2.96944	2.27416	2.91748	7.53389	6.72509	7.14035		inactive receptor kinase At1g27190 precursor, putative, expressed
LOC_Os03g49510	2.62409	0	12.5652	11.3335	11.6972	30.2557	32.7591	30.3921	OsPIPK1, PIP5K	rice phosphatidylinositol monophosphate kinase
LOC_Os02g04460	2.6253	0	18.8779	18.3386	13.9715	49.3063	45.1598	39.9179		ribosomal protein L3, putative, expressed
LOC_Os03g01260	2.62554	0	41.1117	43.7205	47.8344	132.712	112.026	103.584		expansin precursor, putative, expressed
LOC_Os06g23775	2.63248	0	12.1555	12.618	11.4747	36.9961	29.6704	28.7564		expressed protein
LOC_Os02g10990	2.63704	0.00161755	0.860337	1.26216	1.06031	2.70925	3.1153	2.56863		FAD binding domain of DNA photolyase domain containing protein, expressed
LOC_Os01g44210	2.63748	0	29.879	26.9677	28.9809	83.1938	79.7656	63.4096		50S ribosomal protein L31, putative, expressed
LOC_Os08g01310	2.63792	0	9.276	6.9417	7.96766	23.5662	20.1625	20.0703		phospholipase C, putative, expressed
LOC_Os05g41550	2.63864	0	8.88647	10.7865	10.2546	26.391	27.1908	25.3864		expressed protein
LOC_Os04g57200	2.6402	0.000288453	1.91189	3.95724	2.33385	8.11296	7.28967	6.25493		heavy metal transport/detoxification protein, putative, expressed
LOC_Os06g14810	2.64183	0	12.3215	17.037	14.2999	43.853	37.2698	34.2153		3-ketoacyl-CoA synthase, putative, expressed
LOC_Os03g08930	2.64195	2.52668e-06	3.9904	6.76323	3.30883	12.5919	12.5893	11.9712	OsbHLH044	helix-loop-helix DNA-binding protein, putative, expressed
LOC_Os01g12660	2.64246	0	16.564	17.1479	16.1949	37.1842	47.7332	46.9591		AAA-type ATPase family protein, putative, expressed
LOC_Os03g03860	2.64252	1.32597e-08	0.965214	1.06057	1.18457	2.91018	2.72362	2.8496		expressed protein
LOC_Os06g39470	2.64633	1.24225e-06	2.55885	3.24615	2.28431	7.9324	7.50084	5.97375	OsAT8, OsAt8	transferase family protein, putative, expressed
LOC_Os06g45140	2.64706	9.09897e-06	1.41548	1.32805	1.43297	3.88246	3.74232	3.43064	OsbZIP52	bZIP transcription factor
LOC_Os03g49480	2.64769	5.49358e-10	6.10822	6.46315	5.4934	18.9144	16.5508	12.3646		elongation of fatty acids protein 2, putative, expressed
LOC_Os06g08470	2.64948	5.13815e-06	2.4514	2.37466	2.40463	7.39112	6.13303	5.63341		expressed protein
LOC_Os02g21190	2.65371	8.29121e-08	0.697818	0.886639	1.0549	2.44253	2.4063	2.15526		expressed protein
LOC_Os12g28015	2.65454	9.04222e-10	14.7762	15.1239	12.5448	46.1	37.7337	28.8383		expressed protein
LOC_Os12g38560	2.65788	2.50932e-05	2.36379	1.89831	1.38298	5.08026	5.16885	4.75483		expressed protein
LOC_Os03g53200	2.65989	3.0027e-10	2.52543	3.0102	2.73534	7.29303	7.33476	7.3721	OsCML4	calmodulin
LOC_Os05g27100	2.66231	0	21.1621	17.8589	16.2526	55.9848	50.5098	40.6606		expressed protein
LOC_Os01g58580	2.66532	0	12.5554	9.46352	8.39764	28.2543	28.3685	24.4471	OsMC6, MC6	ICE-like protease p20 domain containing protein, putative, expressed
LOC_Os03g16780	2.6664	0	5.6738	6.77517	6.58677	18.7106	16.5608	15.4855		ankyrin repeat family protein, putative, expressed
LOC_Os03g07990	2.66691	5.73243e-10	3.43637	3.00347	3.50773	8.38181	9.79985	8.34765		acetyltransferase, GNAT family, putative, expressed
LOC_Os09g23084	2.66724	1.72939e-05	1.40737	1.13722	1.48671	4.21848	3.53444	2.99951	OsGH9B11	endoglucanase, putative, expressed
LOC_Os03g03290	2.66737	0	12.8682	12.7309	13.4315	35.4958	35.888	32.7251		receptor-like protein kinase At3g46290 precursor, putative, expressed
LOC_Os05g49060	2.66892	0	33.9043	19.7862	20.6456	67.8927	69.7047	60.7997		uncharacterized protein ycf23, putative, expressed
LOC_Os07g09280	2.67293	8.40419e-06	2.55357	3.20767	3.12668	8.69073	7.8364	7.22963		expressed protein
LOC_Os03g20100	2.6749	0	14.4545	14.6858	13.5104	37.4927	38.953	37.6408		S1 RNA binding domain containing protein, expressed
LOC_Os02g39740	2.67538	6.92668e-10	4.04535	4.21793	4.67279	13.6788	11.8221	9.10801		psaB translation factor, putative, expressed
LOC_Os01g63460	2.68094	2.17271e-05	1.18219	1.41167	1.1299	3.28148	3.57204	3.12965		MYB family transcription factor, putative, expressed
LOC_Os02g09480	2.68201	0	8.14575	7.15599	6.68887	20.8809	19.0509	19.0472		myb-like DNA-binding domain containing protein, putative, expressed
LOC_Os06g37364	2.68352	6.5005e-08	2.79517	2.17431	2.21456	6.34879	7.54847	5.38127	d35, d35(t), dwf30, OsKOL2, KOL2, KO2, OsKO2, OSKO2, KO, CYP701A, CYP701A6, Os KO2, OsKOL2/CYP701A	tanginbozu dwarf; dwarf-35;ent-kaurene oxidase gene;Gibberellin Biosynthesis Enzyme
LOC_Os07g03120	2.68473	1.12158e-08	3.10943	3.80011	3.97109	9.32848	9.70607	10.177		expressed protein
LOC_Os03g11590	2.685	0	8.46397	7.63972	7.88489	20.9857	22.2615	21.1622		integral membrane protein, putative, expressed
LOC_Os08g35480	2.68586	0	12.2169	10.7416	11.0295	35.1038	27.5928	28.5904		cupin superfamily protein, putative, expressed
LOC_Os01g43870	2.68741	0	4.22386	4.29922	4.43719	11.273	11.888	11.6686		NLI interacting factor-like phosphatase, putative, expressed
LOC_Os12g15450	2.68826	0.000175436	0.630846	0.560729	0.84178	1.98546	1.63486	1.84586		expressed protein
LOC_Os01g04450	2.68871	0.0447854	0.905672	0.609856	0.553896	2.15578	1.91154	1.49676	OsWAK2	OsWAK2 - OsWAK receptor-like cytoplasmic kinase OsWAK-RLCK, expressed
LOC_Os03g29770	2.68982	0	19.2525	23.9581	22.1924	67.2222	54.4792	54.2213		EF hand family protein, expressed
LOC_Os06g21730	2.69005	8.48413e-05	1.14148	1.22533	1.02937	3.10587	3.30706	2.72298		retrotransposon protein, putative, Ty3-gypsy subclass, expressed
LOC_Os03g11670	2.69029	0.00224411	0.840958	0.75948	0.966751	2.51068	2.48599	1.90982	OsPPR676, PPR676	pentatricopeptide repeat domain containing protein, putative, expressed
LOC_Os07g39680	2.69116	0	36.6031	41.7324	37.6877	113.387	89.2178	109.632		UV-induced protein uvi15, putative, expressed
LOC_Os03g12020	2.69174	0	14.9032	16.4051	16.3968	44.5948	46.8755	36.9393		50S ribosomal protein L15, chloroplast precursor, putative, expressed
LOC_Os01g11350	2.69544	4.3446e-07	2.4674	2.75857	2.6065	8.16421	7.47648	5.47129	OsbZIP02, OsbZIP2, OsSTA8	bZIP transcription factor
LOC_Os12g40920	2.69709	2.45855e-05	1.27322	0.930843	0.912679	3.01623	2.88533	2.50458	OsbZIP88	bZIP transcription factor
LOC_Os02g19420	2.69748	3.61133e-05	3.51842	2.88096	1.73449	6.69497	8.00138	7.24457	OsEnS-35	expressed protein
LOC_Os11g40530	2.70169	0.0405094	3.61136	4.2399	2.91731	12.9167	8.30332	7.87334	OsLTP2.13, OsLtpII.13	LTPL162 - Protease inhibitor/seed storage/LTP family protein precursor, expressed
LOC_Os02g47560	2.70534	4.60897e-05	1.25993	0.905444	1.33096	2.8558	3.42916	3.17381		DNA-binding protein, putative, expressed
LOC_Os04g52600	2.70651	2.12571e-07	0.895343	0.916409	0.895149	2.47455	2.62958	2.22213		SHR5-receptor-like kinase, putative, expressed
LOC_Os10g33270	2.70683	0	20.8775	23.531	19.1007	60.2616	57.7204	53.9265	OsCYN	cyanate hydratase, putative, expressed
LOC_Os04g45490	2.70804	0	8.30017	7.09621	7.4013	20.3884	22.876	18.4727		elongation factor, putative, expressed
LOC_Os03g16860	2.70984	6.82432e-12	22.8852	29.9274	18.1709	74.9873	54.7335	62.6329	OsHsp71.1, OsHSP71.1, OsMED37_3, MED37_3	rice heat shock protein gene
LOC_Os01g36240	2.71085	0	3.49442	4.40201	4.90836	12.5041	11.9685	10.2393	prx17	peroxidase precursor, putative, expressed
LOC_Os11g12740	2.71255	0.0334283	0.590504	0.649167	0.577586	1.73644	1.90953	1.28342	sp, SP, OsNPF4.1, NPF4.1	short panicle1;peptide transporter
LOC_Os07g17560	2.71306	0.0214584	4.41664	1.93738	3.62882	12.1187	8.4697	6.49575		expressed protein
LOC_Os12g38860	2.71604	0.0088976	0.504614	0.723081	0.554383	1.78515	1.45495	1.60009	Orysa;CKL1, OsSTA287	transposon protein, putative, unclassified, expressed
LOC_Os02g34860	2.71915	1.31533e-06	1.56997	1.80367	1.76002	5.18437	4.65159	4.12326		Regulator of chromosome condensation domain containing protein, expressed
LOC_Os06g19690	2.7193	0	8.8937	8.02043	6.90665	22.225	22.0607	20.4902		expressed protein
LOC_Os10g35644	2.72044	0.000187724	1.3724	1.08053	0.780643	2.94424	3.10816	2.74431		expressed protein
LOC_Os07g11650	2.72119	7.16553e-11	23.58	26.1642	14.5118	50.3146	60.6034	63.9345		LTPL164 - Protease inhibitor/seed storage/LTP family protein precursor, expressed
LOC_Os07g02810	2.72222	0	15.9445	10.4626	14.0792	39.6925	34.0136	36.5061	OsAAO3	L-ascorbate oxidase homolog precursor, putative, expressed
LOC_Os11g03240	2.72298	0.00984043	0.678249	1.22313	1.33062	2.75907	3.08225	2.95934		MATE efflux family protein, putative, expressed
LOC_Os07g29410	2.72305	5.40158e-07	3.92392	4.53319	4.92491	15.5792	12.6612	8.19951	CDSP32	thioredoxin, putative, expressed
LOC_Os03g55930	2.7242	0	16.8607	13.8513	14.0029	45.652	41.3864	34.7739	rps9, OsRPS9	ribosomal protein, putative, expressed
LOC_Os01g18670	2.72423	0	10.6519	8.69216	9.18691	25.7516	24.8728	27.1005	OsABCB1, ABCB1, OsPGP1, OsMDR4	MDR-like ABC transporter, putative, expressed
LOC_Os01g65260	2.72665	0	5.60635	3.84522	5.0371	13.7377	14.6109	11.1569		amidophosphoribosyltransferase, chloroplast precursor, putative, expressed
LOC_Os10g32720	2.72922	6.66054e-09	10.0048	11.0335	5.95427	22.0927	25.6078	25.968		AWPM-19-like membrane family protein, putative, expressed
LOC_Os03g63700	2.72926	7.85717e-05	2.09445	1.62087	2.48234	6.26354	5.49745	5.15403		AIG2-like family domain containing protein, expressed
LOC_Os04g36630	2.73024	9.76901e-09	2.10214	2.55275	2.48412	5.87257	7.126	6.4926		expressed protein
LOC_Os02g57120	2.73396	6.43915e-07	0.793983	0.572861	1.00374	2.17152	2.28611	2.02345		HEAT repeat family protein, putative, expressed
LOC_Os11g26880	2.73638	1.72655e-09	4.41631	4.9559	4.21561	12.9946	13.5049	10.682	OsRALF-33, OsRALF33, RALF-33	RALFL14 - Rapid ALkalinization Factor RALF family protein precursor, expressed
LOC_Os10g26050	2.73647	0.000667739	0.672766	0.668342	0.773401	2.0682	2.1495	1.5686		methionyl-tRNA synthetase, putative, expressed
LOC_Os12g03230	2.73805	0.00321728	1.40737	1.92064	1.70696	4.29568	4.39229	5.09803		MATE efflux family protein, putative, expressed
LOC_Os01g48750	2.74241	0	5.37726	5.30895	4.77556	15.3041	13.479	13.6195		aspartic proteinase nepenthesin-2 precursor, putative, expressed
LOC_Os01g70470	2.74318	0	15.3383	16.7012	21.0294	47.5577	50.9405	47.0792		expressed protein
LOC_Os02g13560	2.74778	0	20.5225	17.0305	17.6831	48.3337	53.4309	50.0119	OsTMT2	monosaccharide transporter
LOC_Os03g50280	2.74781	8.75199e-05	1.875	1.59926	1.88638	5.51864	5.16686	4.04455		GLTP domain containing protein, putative, expressed
LOC_Os09g24330	2.75112	9.43462e-09	1.692	1.93727	2.12062	5.9373	4.8622	5.01916	OsRLCK270	TKL_IRAK_DUF26-lg.2 - DUF26 kinases have homology to DUF26 containing loci, expressed
LOC_Os02g02910	2.75161	3.07094e-11	1.60648	1.5748	1.52973	4.70719	4.29564	3.96005		expressed protein
LOC_Os07g10770	2.75265	0	27.6928	26.784	27.8947	80.5997	79.6304	66.5096	OsCesA8, OsCESA8, OS_CESA08, CesA8	CESA8 - cellulose synthase, expressed
LOC_Os06g39240	2.75444	0.0397085	4.99657	9.41	4.36335	25.5769	15.2182	10.9054		endothelial differentiation-related factor 1, putative, expressed
LOC_Os06g44500	2.75478	0	3.27985	3.18338	3.19593	9.32061	8.46813	8.82011	OsFbox319, Os_F0429	OsFBK17 - F-box domain and kelch repeat containing protein, expressed
LOC_Os06g40850	2.75574	1.13241e-06	1.0602	1.10642	1.62506	3.99049	3.39793	3.06048		IQ calmodulin-binding motif family protein, putative, expressed
LOC_Os02g50960	2.75718	0	10.8158	12.8442	10.8693	31.9928	34.3228	28.8879	PIN1A, OsPIN1A, OsPIN1a, REH1, OsPIN1, OsPIN1b	auxin efflux transporter
LOC_Os01g71080	2.75742	4.05365e-09	3.94589	2.96173	2.6598	9.4799	8.66066	8.24082	OsCLP, CLP	xylanase inhibitor, putative, expressed
LOC_Os12g04204	2.7618	0	30.6849	42.3819	52.4025	107.374	127.2	111.948		expressed protein
LOC_Os11g01830	2.76272	0.00826674	1.07546	1.25259	0.861859	3.42892	2.67315	2.71075		staphylococcal nuclease homologue, putative, expressed
LOC_Os06g45820	2.76831	0	13.6627	11.8922	11.8045	35.0761	35.3427	33.0037	OsFtsH2, FtsH2	OsFtsH2 FtsH protease, homologue of AtFtsH2/8, expressed
LOC_Os10g37190	2.76963	0	4.19043	3.45782	3.67173	11.557	9.72882	10.0663	OsRLCK303	protein kinase domain containing protein, expressed
LOC_Os05g01110	2.7705	0	37.9739	30.1393	31.5287	105.856	90.0916	80.1104		ribosomal protein L28 protein, putative, expressed
LOC_Os04g57340	2.77168	0.0343514	2.94737	2.41337	3.73623	10.7625	8.07918	6.37219	OsERF#076, OsERF076, OsERF76, AP2/EREBP#046, AP2/EREBP46	AP2 domain containing protein, expressed
LOC_Os01g62260	2.77324	0	84.6083	75.7559	80.0438	225.497	201.168	240.043		thaumatin, putative, expressed
LOC_Os07g32010	2.77641	0.000338356	2.62574	1.06319	1.52405	5.62582	4.56987	4.27767		UDP-glucoronosyl and UDP-glucosyl transferase domain containing protein, expressed
LOC_Os02g56940	2.78303	0	6.34108	7.42776	7.59169	22.2344	20.5292	16.6834		expressed protein
LOC_Os04g51450	2.78429	2.16672e-09	2.40852	3.0171	2.5443	7.00893	7.33569	7.84597	OsXTH6	glycosyl hydrolases family 16, putative, expressed
LOC_Os02g03900	2.78584	2.78845e-06	1.29171	1.41435	1.20587	3.83421	3.50724	3.55657	OsNRAMP4, Nrat1, Nramp6, OsNRAT1, FCO5	Nramp aluminum transporter 1
LOC_Os05g11428	2.78642	2.14966e-09	1.5133	1.69347	1.32152	3.83265	4.56812	4.21691		expressed protein
LOC_Os06g19750	2.78645	0	8.80966	10.0573	10.0733	32.2048	28.5026	19.9335		expressed protein
LOC_Os06g43860	2.78813	0.000141155	1.16673	1.19418	1.36945	3.5829	3.94837	2.86947		homeobox protein knotted-1, putative, expressed
LOC_Os11g15230	2.79005	0	6.94857	7.05423	7.63867	22.9943	19.3568	18.0296		expressed protein
LOC_Os06g42720	2.79069	0	78.4188	84.2219	84.9193	236.531	238.914	215.419	OsATL5	amino acid transporter, putative, expressed
LOC_Os05g11950	2.79138	0	5.23748	6.30473	6.47226	18.4066	16.8214	15.0572	OsGELP64, OsGELP64a, OsGELP64b	GDSL-like lipase/acylhydrolase, putative, expressed
LOC_Os11g01040	2.79165	0.00210543	1.43198	2.56492	2.55269	7.19583	4.31598	6.77235		monoglyceride lipase, putative, expressed
[truncated: 2,319 more rows]

## Sheet: Table S2
Supplemental Table 1. Differentially expressed genes in the 10-DAF-old embryos of osnf-yb7.
Locus ID	osnf-yb7 vs. WT - Fold change	osnf-yb7 vs. WT - Bonferroni	WT-1_RPKM	WT-2_RPKM	WT-3_RPKM	osnf-yb7-1_RPKM	osnf-yb7-2_RPKM	osnf-yb7-3_RPKM	Gene name	MSU Annotation
LOC_Os09g20440	0.000828178	3.49298e-12	11.4352	11.6574	13.1933	0	0	0.0300512	sdh2-2	succinate dehydrogenase and fumarate reductase iron-sulfur protein, expressed
LOC_Os11g37270	0.00121748	0	38524.1	36504.2	40340	99.2088	21.3764	19.8728	OsEnS-146, EnS-146, OsEnS146, EnS146	AMBP1 - Antimicrobial peptide MBP-1 family protein precursor, expressed
LOC_Os03g62590	0.00127292	0	195.381	187.405	209.108	0.448184	0.194705	0.110545	OsEnS-59	oxidoreductase, short chain dehydrogenase/reductase family domain containing protein, expressed
LOC_Os07g15540	0.00130011	0	38.9067	43.8308	44.3069	0.124295	0	0.0408767	PK3, OsPK3, OsETR4, OS-ETR4	ethylene receptor
LOC_Os07g46360	0.00130668	0	237.982	224.22	267.036	0.501966	0.327105	0.123811	OsGLYI10, OsEnS-113	glyoxalase family protein, putative, expressed
LOC_Os09g26380	0.00168385	0	277.568	261.199	237.745	0.5568	0.51943	0.231302	OsEnS-128, OsAlaAT5, AlaAT5	aminotransferase, classes I and II, domain containing protein, expressed
LOC_Os09g08280	0.00171771	0	309.138	235.906	364.687	0.674571	0.602856	0.28523	OsEnS-125	expressed protein
LOC_Os05g04870	0.00178806	0	1904	1934.76	1961.36	4.97077	3.99323	1.40694		oxidoreductase, short chain dehydrogenase/reductase family protein, putative, expressed
LOC_Os01g29780	0.00184292	0	84.4336	97.8846	90.4975	0.143876	0.075005	0.283898		expressed protein
LOC_Os03g12180	0.00185864	7.15363e-09	3.70937	3.67054	4.2073	0	0	0.0215365		MA3 domain containing protein, expressed
LOC_Os04g46200	0.00187015	0	5766.88	6292.83	7493.5	20.7949	9.55343	6.21904	ole16, OsEnS-72	oleosin, putative, expressed
LOC_Os03g53610	0.0018725	0	27.7203	32.1506	36.9876	0.0887912	0.0925769	0	OsLEA31	late embryogenesis abundant protein D-34, putative, expressed
LOC_Os01g21900	0.00196589	0	36.3348	37.2054	46.347	0.118637	0	0.117048		expressed protein
LOC_Os03g04190	0.00210198	0	26.9227	27.3591	33.0013	0.10944	0.0380355	0.0359916		cytochrome P450, putative, expressed
LOC_Os03g53620	0.0022952	0	114.175	123.577	150.485	0.291464	0.455837	0.14378	OsLEA32, OsEnS-55	late embryogenesis abundant protein D-34, putative, expressed
LOC_Os07g22224	0.00230067	0	134.638	145.603	121.711	0.352504	0.294027	0.278227		expressed protein
LOC_Os11g38850	0.00234666	3.19119e-08	4.45014	4.38855	3.5151	0	0.0289901	0	OsEnS-147	TKL_IRAK_DUF26-la.7 - DUF26 kinases have homology to DUF26 containing loci, expressed
LOC_Os08g11265	0.00235569	0	19.7028	20.6424	16.282	0.0671477	0	0.0662484		retrotransposon protein, putative, unclassified, expressed
LOC_Os01g67830	0.00249012	0	24.236	25.1911	23.7735	0.0447651	0.0933475	0.0441656		B3 DNA binding domain containing protein, expressed
LOC_Os05g25490	0.00261468	1.45689e-07	3.47996	5.11838	5.88709	0.0378747	0	0	OsACS4, OS-ACS4	aminotransferase, classes I and II, domain containing protein, expressed
LOC_Os03g57960	0.00262093	0	12600	12753.3	14215	46.5574	39.3507	17.7978	OsEnS-57, EnS-57, CDP3.1	cupin domain containing protein, expressed
LOC_Os06g21910	0.00263276	0	944.017	1041.55	1077.23	3.77836	2.87474	1.4105	OsLEA3, OsEnS-84	late embryogenesis abundant group 1, putative, expressed
LOC_Os03g46100	0.00264997	0	25410.8	24714.3	27248.1	76.9062	106.051	22.0791	OsEnS-51	cupin domain containing protein, expressed
LOC_Os08g11669	0.00292307	0	6.6396	6.50572	8.64729	0.0637013	0	0		expressed protein
LOC_Os12g13445	0.00309602	0	55.7396	51.6986	46.4876	0.315188	0.109542	0.0518278		expressed protein
LOC_Os05g18670	0.00310734	6.80573e-07	3.64916	3.81034	5.57109	0	0	0.0404905	SLAC	C4-dicarboxylate transporter/malic acid transport protein domain containing protein, expressed
LOC_Os08g03410	0.00312519	0	40275.8	39756.9	42030.6	87.4383	284.891	9.14189	OsEnS-115	glutelin, putative, expressed
LOC_Os03g49190	0.00319837	0	4920	5395.64	6528.14	21.9289	17.6154	14.3283	ole18	oleosin, putative, expressed
LOC_Os01g35590	0.00322629	0	105.771	131.517	66.7191	0.534765	0.446052	0		expressed protein
LOC_Os01g28744	0.0034499	0	101.104	112.446	120.08	0.573312	0.224158	0.353521		retrotransposon protein, putative, unclassified, expressed
LOC_Os04g32080	0.00354224	0	120.305	137.887	142.59	0.218881	0.912851	0.287932		11-beta-hydroxysteroid dehydrogenase, putative, expressed
LOC_Os01g08020	0.00367907	0	22.4773	25.1483	29.6201	0.0929567	0.14538	0.0458559	OsBOR3	efflux boron transporter gene
LOC_Os06g21360	0.00375034	0	110.978	116.512	87.0947	0.489723	0.47869	0.211385	OsNHX4	transporter, monovalent cation%3Aproton antiporter-2 family, putative, expressed
LOC_Os01g06630	0.00379277	0	932.1	862.699	994.598	3.33723	3.82065	3.42166	OsLEA20, OsLEA1, OsLEA1a	Late embryogenesis abundant protein gene;Em-Like Protein
LOC_Os05g20954	0.00388631	0	23.3463	26.6766	26.8645	0.0327749	0.136689	0.129344		retrotransposon protein, putative, unclassified, expressed
LOC_Os01g50700	0.00400947	0	420.365	518.353	453.968	2.24558	2.15508	1.18328		dehydrin family protein, expressed
LOC_Os08g45110	0.00402332	0	70.1298	83.3073	64.2752	0.287385	0.399518	0.189024	OsERF#044, OsERF044, OsERF44, AP2/EREBP#112, AP2/EREBP112, OsDREB2C, DREB2C, OsEnS-124	AP2 domain containing protein, expressed
LOC_Os01g19770	0.00412767	0	680.854	703.091	777.457	2.39878	3.0221	3.50067		mitochondrial import inner membrane translocase subunit Tim17, putative, expressed
LOC_Os05g16060	0.0043175	0	24.3435	26.0733	24.1084	0.211503	0.11026	0		expressed protein
LOC_Os06g32355	0.00439884	0	27.7781	37.1166	42.7155	0.238275	0	0.235084		conserved hypothetical protein
LOC_Os10g32030	0.00440779	0	12.7723	15.5694	7.13812	0.0239183	0.0498762	0.0825931		retrotransposon protein, putative, unclassified, expressed
LOC_Os04g43360	0.00467723	0	89.8282	86.1185	72.815	0.473845	0.552171	0.1375	Os4bglu14, Os4Bglu14, Os4BGlu14	Os4bglu14 - monolignol beta-glucoside homologue without catalytic acid/base, expressed
LOC_Os01g54520	0.0048754	0	192.614	206.947	225.99	0.986005	1.6511	0.412703	OsSTA32	DUF1264 domain containing protein, putative, expressed
LOC_Os09g20400	0.00517765	0	102.523	106.122	112.65	0.666211	0.572037	0.425305	OsEnS-127	expressed protein
LOC_Os09g39730	0.0054495	0	76.9466	88.2107	90.564	0.498799	0.297181	0.597573		Core histone H2A/H2B/H3/H4 domain containing protein, putative, expressed
LOC_Os03g52080	0.00554896	0	11.9653	10.7504	10.8961	0.0938839	0	0.0926266	OsSCP21	OsSCP21 - Putative Serine Carboxypeptidase homologue, expressed
LOC_Os09g03410	0.00555649	3.81533e-05	2.10743	2.27773	2.63698	0	0.0390185	0		retrotransposon protein, putative, Ty3-gypsy subclass, expressed
LOC_Os03g53350	0.00582893	0	5.36238	6.71113	7.73854	0.115483	0	0		anthocyanin 3-O-beta-glucosyltransferase, putative, expressed
LOC_Os07g29760	0.00608985	0	190.843	228.898	237.179	1.10322	2.01295	0.884364	OsEnS-106	cysteine proteinase A494 precursor, putative, expressed
LOC_Os06g25910	0.00629509	0	7.70512	6.12184	3.59653	0.0544432	0.0283822	0.026857		retrotransposon protein, putative, Ty1-copia subclass, expressed
LOC_Os06g32350	0.00630631	0	129.201	155.641	175.553	0.566127	1.91836	0.418909		THION12 - Plant thionin family protein precursor
LOC_Os03g06360	0.00636105	0	430.714	453.762	457.393	2.77999	3.50418	2.25152	OsLEA30, OsEnS-43	late embryogenesis abundant protein D-34, putative, expressed
LOC_Os01g51610	0.00694945	0	18.4235	21.6468	20.7291	0.0753452	0.235673	0.111504	OsLFL1, OsSTA29	transcription factor
LOC_Os01g43851	0.00710945	0	5.67425	7.01718	5.68553	0.0320859	0.0669079	0.0316562		cytochrome P450 72A1, putative, expressed
LOC_Os11g24280	0.00715145	0	8.64112	10.5429	7.88117	0.0475347	0.0991227	0.0468981		retrotransposon protein, putative, unclassified
LOC_Os07g24000	0.00780701	0	742.278	813.761	789.38	4.16294	4.90658	9.24118	OsPM19L2	AWPM-19-like membrane family protein, putative, expressed
LOC_Os05g28210	0.00856272	0	4048.37	4549.66	4790.42	32.5955	31.3155	50.7306	Em*, EMP1, Emp1, EM, Em, OsEm, Osem, OsLEA21, OsEm1, Em1	Embryonic abundant protein 1
LOC_Os05g49440	0.00872326	0	693.103	795.819	877.811	7.68877	9.82825	3.12861		DUF1264 domain containing protein, putative, expressed
LOC_Os06g26180	0.00956664	0.00169581	4.29166	4.10778	4.75144	0	0.12581	0		expressed protein
LOC_Os04g52750	0.0096519	0	1994.92	1925.54	2715.15	10.3935	33.7139	19.9389		expressed protein
LOC_Os03g42430	0.00985247	0	8.58332	11.6987	11.7115	0.0768839	0.200405	0.0379271		B3 DNA binding domain containing protein, expressed
LOC_Os06g26010	0.0104425	0	37.3076	40.4245	51.8009	0.245527	0.767986	0.339134		retrotransposon protein, putative, Ty3-gypsy subclass
LOC_Os12g43140	0.0104553	0	36.9464	44.3607	40.659	0.669288	0.523368	0.0825406	LEA D-34	late embryogenesis abundant protein D-34, putative, expressed
LOC_Os10g24480	0.0106725	0	7.63951	8.62154	5.90843	0.0781068	0.0814369	0.0770608		retrotransposon, putative, centromere-specific, expressed
LOC_Os11g22150	0.0106994	0	119.262	129	136.351	0.825401	1.86462	1.42511		retrotransposon protein, putative, unclassified, expressed
LOC_Os07g16610	0.010928	0	6.29158	7.82541	7.37537	0.0936504	0.0488217	0.0923962		retrotransposon protein, putative, Ty1-copia subclass, expressed
LOC_Os01g45624	0.0110017	0	21.5993	24.1345	29.1753	0.0806731	0.504676	0.238778		oleosin, putative, expressed
LOC_Os04g43800	0.011531	0	4.20434	4.69734	4.12314	0.0638333	0.0443699	0.0419856	OsPAL07, OsPAL, PAL07, OsPAL6, PAL1, OsPAL7, PAL7	phenylalanine ammonia-lyase gene
LOC_Os06g32370	0.0117525	3.08727e-07	5.86623	5.34337	10.6039	0	0.13172	0.124642		THION16 - Plant thionin family protein precursor, putative
LOC_Os03g09250	0.011968	0	720.792	903.145	746.889	11.4522	9.10673	7.81522	OsINO1, MIPS, IPS, RINO1, OsINO1-1, OsRINO1, OsMIPS1, MIPS1	inositol-3-phosphate synthase, putative, expressed
LOC_Os04g32070	0.0121556	0	107.307	115.427	134.809	0.849495	1.94014	1.55651	OsEnS-62	dehydrogenase/reductase, putative, expressed
LOC_Os04g50740	0.0122747	0	5.7187	5.91415	4.41968	0.0830866	0.0866291	0.0273246		ara54-like RING finger protein, putative, expressed
LOC_Os01g52830	0.0123781	0	201.219	227.435	259.029	2.72808	3.16947	2.61464		DUF1264 domain containing protein, putative, expressed
LOC_Os01g58670	0.0128362	0	10.4712	11.0027	10.6711	0.133739	0.278882	0		expressed protein
LOC_Os05g06560	0.0130433	0	7.19891	8.57695	5.6146	0.186836	0	0.092167		expressed protein
LOC_Os12g40730	0.0135019	0	44.3804	49.8724	40.7438	0.587881	0.757169	0.477654	OsbHLH116	helix-loop-helix DNA-binding domain containing protein, expressed
LOC_Os08g23870	0.0136239	0	1720.12	1707.22	2104.83	26.4562	34.9353	13.9784	OsLEA4	late embryogenesis abundant group 1, putative, expressed
LOC_Os01g38520	0.0138496	8.55512e-07	1.91866	2.0034	1.65728	0	0.0397026	0.0375691		expressed protein
LOC_Os07g44430	0.0138773	0	1541.39	1670.99	1772.14	27.2797	24.9162	16.9756	Os1-CysPrxA, 1-CysPrxA	peroxiredoxin, putative, expressed
LOC_Os05g49240	0.0140111	0	27.1256	23.5882	37.4262	0.346449	0.632136	0.256357		homeodomain-related, putative, expressed
LOC_Os05g25040	0.0140808	0	103.759	109.571	112.452	0.874085	1.98841	1.72476		expressed protein
LOC_Os05g35050	0.0141229	0.0482063	0.696603	2.31436	1.5277	0.064099	0	0	COPT5, OsCOPT5	copper transporter gene
LOC_Os05g39690	0.0143312	0	1163.02	1142.7	1233.29	14.4552	20.9277	15.3356		oxidoreductase, aldo/keto reductase family protein, putative, expressed
LOC_Os01g53650	0.0143815	0	26.4186	32.0348	30.2719	0.632569	0.359749	0.283681	OsC3H10, OsTZF8, OsCCCH-Zn-2, OsEnS-12	zinc finger CCCH type family protein, putative, expressed
LOC_Os05g25030	0.0144234	0	67.9913	84.199	47.5944	0.602359	0.942063	1.33716		expressed protein
LOC_Os03g42520	0.0149117	0	18.7222	18.2238	16.339	0.0291992	0.304441	0.46093	OsEnS-49	expressed protein
LOC_Os01g20030	0.0149599	2.65821e-06	2.87274	3.78899	3.56815	0.153038	0	0	OsDOG1L-1	expressed protein
LOC_Os02g32860	0.015395	0	718.828	705.857	593.961	7.47014	15.4159	8.19113	OsEnS-38, OsPARP3, PARP3	poly synthetase 3, putative, expressed
LOC_Os03g51990	0.0154502	0	7.78252	8.16144	8.65751	0.034101	0.177774	0.168221	OsSTA113	ACT domain containing protein, expressed
LOC_Os01g02120	0.015662	0	860.247	810.501	933.066	5.88799	30.1929	4.70012	OsMFT2	osMFT2 MFT-Like2 homologous to Mother of FT and TFL1 gene%3B contains Pfam profile PF01161%3A Phosphatidylethanolamine-binding protein, expressed
LOC_Os09g21919	0.0158321	0	142.623	142.724	101.892	1.57855	2.44223	2.11003		expressed protein
LOC_Os04g28120	0.0162086	0	14.7092	9.29933	11.8723	0.581578	0	0	OsPRR12, Rra17, OsRRA17, OsEnS-61	response regulator receiver domain containing protein, expressed
LOC_Os01g32864	0.0166946	0	29.5367	30.2119	30.137	0.474548	0.424098	0.601962		retrotransposon protein, putative, unclassified, expressed
LOC_Os02g29590	0.0169264	0	45.6753	46.0153	34.1543	0.527357	0.778943	0.8238		expressed protein
LOC_Os08g23170	0.0175063	0	219.841	230.314	261.544	3.93985	6.33291	2.18649	OsEnS-120	expressed protein
LOC_Os01g21490	0.0176856	1.66732e-05	0.996278	1.56042	1.21912	0.0336138	0	0.0331636		transposon protein, putative, CACTA, En/Spm sub-class
LOC_Os01g54030	0.0178481	0	303.515	308.107	261.68	4.84187	7.42398	3.32093	OscytME3, OsEnS-13	NADP-dependent malic enzyme, putative, expressed
LOC_Os03g48020	0.0183124	0	3.51069	3.76483	3.21781	0.0640263	0.0333781	0.0947533		expressed protein
LOC_Os08g16860	0.0186303	0	3.11622	2.78342	4.33173	0.0760043	0.0396224	0.0749864	OsFbox433, Os_F0239	OsFBX282 - F-box domain containing protein, expressed
LOC_Os03g21790	0.0188241	0	976.048	995.451	1175.21	24.1736	23.361	11.6995	CDP3.2	cupin domain containing protein, expressed
LOC_Os02g25680	0.0192633	0	54.4287	54.9205	44.3573	0.991479	1.03375	0.93567		expressed protein
LOC_Os02g15250	0.019298	0	545.436	596.53	508.67	8.71386	13.9098	9.23028	OsLEA15	late embryogenesis abundant domain-containing protein, putative, expressed
LOC_Os04g43170	0.0193367	0	2520.32	2518.53	2912.44	46.9223	79.6485	27.1813	OsEnS-68	caleosin related protein, putative, expressed
LOC_Os09g03570	0.0206796	3.52477e-08	1.09735	1.56796	1.57501	0.0876882	0	0		retrotransposon, putative, centromere-specific, expressed
LOC_Os03g58180	0.0206805	1.0479e-11	6.28283	8.39723	10.2801	0	0.26522	0.250968		basic proline-rich protein precursor, putative, expressed
LOC_Os07g14600	0.0212295	1.0479e-11	3.62146	2.90457	3.52317	0.0531244	0.0553894	0.104826		hydrolase, putative, expressed
LOC_Os09g30240	0.0214179	0	28.8795	31.7325	30.4749	0.782347	0.85278	0.315765	OsEnS-130, OsPFK09, PFK09, PFK9	phosphofructokinase, putative, expressed
LOC_Os01g41720	0.0214511	0	8.36227	8.02366	6.60356	0.1634	0.136294	0.193455	OsEnS-10	expressed protein
LOC_Os05g30490	0.0218962	0	12.6119	14.0617	13.3776	0.216365	0.375983	0.284623		harpin-induced protein 1 domain containing protein, expressed
LOC_Os08g28660	0.0225849	2.79439e-11	10.7668	12.4688	12.1142	0.396289	0.206593	0.195491		expressed protein
LOC_Os08g10800	0.0225861	0	10.9258	15.7776	20.4812	0.588242	0.245329	0.232146		expressed protein
LOC_Os06g25930	0.0227898	0	3.4258	2.72542	1.40306	0	0.172161	0		retrotransposon protein, putative, unclassified, expressed
LOC_Os03g13984	0.0228417	0	4.13765	4.73851	5.0398	0.135099	0.0939058	0.0888595		expressed protein
LOC_Os03g10110	0.023227	0	3591.03	3859.35	3646.58	48.4066	144.681	64.6614		cupin domain containing protein, expressed
LOC_Os04g51796	0.0235197	0	59.2262	63.1983	51.2219	1.11014	1.70575	1.26821		DNA repair ATPase-related, putative, expressed
LOC_Os07g35020	0.0239175	0	45.5889	55.4239	59.3305	0.522881	1.63553	1.67661		expressed protein
LOC_Os03g53690	0.0242424	0	20.9092	23.2072	33.9849	0.409954	0.320575	1.16283		oxidoreductase, short chain dehydrogenase/reductase family domain containing protein, expressed
LOC_Os02g56500	0.0244135	0	56.6062	57.5832	50.1325	1.24639	1.81935	0.945924	OsSEC24, OsSEC27, SEC24, SEC27	expressed protein
LOC_Os12g38340	0.0244683	0	12.1172	14.655	20.4812	0.352945	0.367993	0.435273	OsRALF-40, OsRALF40, RALF-40	RALFL42 - Rapid ALkalinization Factor RALF family protein precursor, expressed
LOC_Os05g13630	0.0247473	0	4.75417	4.59914	4.91314	0	0.0737831	0.279273	OsGRP5	RNA recognition motif containing protein, putative, expressed
LOC_Os06g42220	0.0257505	0	3.40423	3.4361	3.92763	0	0.239507	0.0377728		TOO MANY MOUTHS precursor, putative, expressed
LOC_Os04g42590	0.0258895	0	37.5852	44.4825	47.3471	0.890089	0.996782	1.46361		expressed protein
LOC_Os01g52680	0.0261139	0	12.5555	16.3629	14.8522	0.47776	0.0996259	0.565634	OsMADS32, CFO1, CFO1/OsMADS32, TRI1, OsMADS32/CFO, CFO	MIKC-type MADS box gene; Chimeric Floral Organs1
LOC_Os08g12449	0.0262636	0	225.981	239.548	243.342	3.9319	7.54553	7.14006		expressed protein
LOC_Os03g14210	0.0264565	0	12.4755	13.7539	15.742	0.224346	0.601487	0.284582		glycosyl hydrolases family 17, putative, expressed
LOC_Os08g01370	0.0265116	0	650.71	767.135	931.859	12.4198	26.708	23.1667		expressed protein
LOC_Os11g22449	0.0265607	0	46.8952	48.8225	41.5194	0.977252	0.946138	1.72172		expressed protein
LOC_Os04g09390	0.0266572	0	5319.04	5133.86	5138.77	68.2734	167.291	180.066		HEV3 - Hevein family protein precursor, expressed
LOC_Os03g53900	0.026744	0	251.489	270.436	288.222	9.29182	8.11087	4.2639		universal stress protein domain containing protein, putative, expressed
LOC_Os04g56700	0.0267658	3.49298e-12	2.10759	2.07612	3.29501	0.120751	0	0.0794226	OsF3H-1, F3H-1, OsF3H1, OsF3H, F3H	naringenin,2-oxoglutarate 3-dioxygenase, putative, expressed
LOC_Os11g47453	0.0275801	0	1919.95	1950.41	1749.6	30.916	64.4141	59.6689		expressed protein
LOC_Os06g30179	0.0283996	0	11.4865	11.3582	11.3815	0.187523	0.335174	0.449314		cytochrome P450, putative, expressed
LOC_Os05g20460	0.028544	0	11.8323	14.4662	6.96452	0.227401	0.447849	0.274212		retrotransposon protein, putative, unclassified, expressed
LOC_Os01g27449	0.0289136	0	310.847	337.716	314.284	5.58315	10.5509	11.7053		expressed protein
LOC_Os12g21540	0.0294928	0	5.02627	6.05937	4.88846	0.13875	0.241109	0.0912611		retrotransposon protein, putative, unclassified, expressed
LOC_Os07g47840	0.0295847	0	19.7558	18.3322	18.2287	0.646206	0.524034	0.495873	OsEnS-114	expressed protein
LOC_Os11g03700	0.0296727	0	8.05412	8.38066	5.98377	0.169838	0.383672	0.111709	OsSET40, SDG733, OsSUVH11	Histone H3K9 Methyltransferase Gene
LOC_Os04g44570	0.0303753	0	55.1666	63.239	68.7077	2.24275	1.73879	1.70209	OsTIP3;2, TIP3-2, OsEnS-70	aquaporin protein, putative, expressed
LOC_Os10g21784	0.03068	0	104.148	115.869	118.208	2.09362	4.54276	3.74038		expressed protein
LOC_Os11g24270	0.0311516	0	2.4064	2.93792	2.04508	0.0499635	0.143258	0.0369708		retrotransposon protein, putative, Ty3-gypsy subclass, expressed
LOC_Os09g09420	0.0316271	0	1.72265	2.27743	2.25853	0.0421847	0.0586443	0.0971127		transposon protein, putative, CACTA, En/Spm sub-class, expressed
LOC_Os09g19520	0.0316617	0.00506935	3.96558	3.14124	1.57768	0.13841	0	0.136556		retrotransposon, putative, centromere-specific
LOC_Os03g02050	0.0316889	0	1375.94	1625.34	1956.77	54.6608	50.3121	52.1426	nsLTP2, OsLTP2.3, Ltp2, OsLTP2, RLTP2, OsLtpII.3	LTPL151 - Protease inhibitor/seed storage/LTP family protein precursor, expressed
LOC_Os05g28350	0.0319739	0	3.8967	4.78684	4.42369	0.139206	0.0967607	0.183122	OsERF#117, OsERF117, AP2/EREBP#150, AP2/EREBP150, OsABI4	AP2 domain containing protein, expressed
LOC_Os09g03470	0.0319954	1.4667e-08	0.734744	0.699001	0.633642	0	0.0172312	0.0489156		retrotransposon protein, putative, unclassified, expressed
LOC_Os01g45290	0.0320965	9.86763e-06	0.391873	0.444255	0.223126	0.0339983	0	0		retrotransposon protein, putative, unclassified, expressed
LOC_Os10g39610	0.0322712	0	2419.32	2605.35	2973.55	72.1347	111.311	74.6661	OsMT4, OsMT-II-1a, MT4, MT-II-1a	rice class II metallothionein gene
LOC_Os01g29104	0.0328067	0	125.341	138.814	163.834	3.23132	4.81299	5.99657		expressed protein
LOC_Os01g16920	0.0332276	0	182.507	198.106	211.173	4.32595	7.43605	7.9016	OsEnS-4	embryonic protein DC-8, putative, expressed
LOC_Os04g35430	0.0332901	0	21.7769	22.0245	16.0969	0.503533	0.695627	0.794863		PHD-finger domain containing protein, expressed
LOC_Os01g62140	0.0336564	5.16962e-10	2.60045	4.77237	4.54587	0.239285	0.0831623	0.0786934		retrotransposon, putative, centromere-specific, expressed
LOC_Os03g48010	0.03414	0	5.21141	6.03708	4.1047	0.179147	0.207539	0.137471		exostosin, putative, expressed
LOC_Os01g59200	0.0343285	0	4.50887	4.56535	4.49034	0.230495	0.144193	0.0909631	OsEnS-19	DUF617 domain containing protein, expressed
LOC_Os03g21260	0.0343656	6.98597e-12	2.229	2.50114	1.15151	0.0673479	0.0351097	0.0996689		2,3-bisphosphoglycerate-independent phosphoglycerate mutase, putative, expressed
LOC_Os09g04100	0.034535	0	168.352	155.139	188.802	3.80534	6.90359	6.98314		expressed protein
LOC_Os05g50770	0.0345817	0	4.73021	6.78481	5.35303	0.226792	0.157641	0.198893	SLAC	C4-dicarboxylate transporter/malic acid transport protein, expressed
LOC_Os02g09250	0.0347425	0	11.9685	11.8242	11.2014	0.496996	0.259093	0.459694		cytochrome P450 71D10, putative, expressed
LOC_Os03g59460	0.0352893	0	16.2866	13.4753	14.1861	0.912666	0.356842	0.281389	OsbZIP34	bZIP transcription factor
LOC_Os07g15959	0.0353974	0	705.868	744.667	854.735	18.0933	34.6615	28.8458		expressed protein
LOC_Os09g09040	0.0355032	0	528.947	555.017	609.935	16.1993	21.7965	22.1431		expressed protein
LOC_Os01g04370	0.0358692	0	914.234	832.49	1031.18	31.8521	51.6834	16.1056	Oshsp16.9A, OsHsp16.9A, HSP16.9A, OsHSP16.9A-CI	hsp20/alpha crystallin family protein, putative, expressed
LOC_Os02g30080	0.0360404	0	10.2886	9.9308	12.2375	0.286292	0.671623	0.211844		cytochrome P450, putative, expressed
LOC_Os05g20450	0.0365465	0	8.83464	8.58348	1.74086	0.224879	0.344805	0.13051		retrotransposon protein, putative, unclassified, expressed
LOC_Os01g31040	0.036619	0	10.1801	11.3424	9.36522	0.316607	0.360116	0.454352		retrotransposon protein, putative, unclassified, expressed
LOC_Os02g38090	0.0370676	0.00856027	0.859985	0.954093	1.18388	0.0544038	0.0567234	0	OsERF#079, OsERF079, OsERF79, AP2/EREBP#017, AP2/EREBP17	AP2 domain containing protein, expressed
LOC_Os12g27830	0.0370868	0	651.204	644.774	714.148	18.6371	33.7761	22.136	OsEnS-150, OsDR, DR	dehydrogenase/reductase, putative, expressed
LOC_Os04g35490	0.0373576	0	89.7464	99.5986	101.221	2.7932	4.34733	3.71433	OsEnS-66	expressed protein
LOC_Os04g35270	0.038	0	2.7672	3.65427	3.4146	0.0823796	0.128838	0.162553		alpha-1,4-fucosyltransferase, putative, expressed
LOC_Os12g40590	0.0380666	0	3.41305	3.03452	3.75704	0	0.320963	0.0674923	OsbHLH135	helix-loop-helix DNA-binding domain containing protein, expressed
LOC_Os08g18974	0.0380853	0	65.9998	60.5355	54.0306	1.85151	3.05137	1.97403	OsEnS-119	expressed protein
LOC_Os05g20560	0.0383675	0	44.6773	44.8888	41.4741	0.668298	2.05166	2.30772		retrotransposon protein, putative, unclassified, expressed
LOC_Os01g57370	0.0384412	0	8.19726	8.09351	7.39879	0.169329	0.323672	0.417653	OsCNGC1, OsCNGC15, CNGC15	cyclic nucleotide-gated ion channel 2, putative, expressed
LOC_Os06g24420	0.0389697	0	3.78498	3.96926	3.48872	0.116093	0.207503	0.114539		transposon protein, putative, CACTA, En/Spm sub-class, expressed
LOC_Os06g24430	0.0391144	0	454.469	512.166	539.038	13.2128	25.9482	19.7324		expressed protein
LOC_Os03g12700	0.0394849	8.97894e-05	0.495577	0.735347	0.76601	0.0528015	0	0.0260472		expressed protein
LOC_Os02g19720	0.039781	0	3.05742	4.01036	3.31282	0.153454	0.133331	0.126166		retrotransposon protein, putative, unclassified, expressed
LOC_Os11g24260	0.039782	0	36.8008	37.6043	37.6701	0.497982	2.38839	1.5722		retrotransposon protein, putative, Ty3-gypsy subclass
LOC_Os09g15520	0.0400785	0	435.102	471.872	562.682	16.7213	24.1633	18.0169	OsOLE4, Os-OLE4	oleosin, putative, expressed
LOC_Os05g30890	0.0402391	0	5.31064	5.51405	5.78919	0.0905955	0.220402	0.357529		cytochrome P450, putative, expressed
LOC_Os03g02670	0.0406805	0	10.9662	11.9002	12.0927	0.469475	0.489492	0.463188		transporter family protein, putative, expressed
LOC_Os06g32610	0.0407789	0	37.1036	46.9835	41.1051	1.46917	1.91476	1.72127		expressed protein
LOC_Os06g18670	0.0420413	0	158.92	171.23	207.208	5.22241	9.57807	7.79078	UGT	anthocyanidin 3-O-glucosyltransferase, putative, expressed
LOC_Os07g28970	0.0420726	0	7.50413	10.8165	9.4963	0.16512	0.516482	0.488727		retrotransposon, putative, centromere-specific, expressed
LOC_Os04g12370	0.042087	0	76.0676	92.6429	105.251	2.35297	5.17916	3.99806		expressed protein
LOC_Os08g45200	0.042105	0	6.11121	5.36634	6.02973	0.300113	0.173838	0.263194		expressed protein
LOC_Os04g40460	0.042158	0.000103291	0.852502	0.692344	0.761691	0.0639176	0.0333214	0		cytochrome P450, putative, expressed
LOC_Os01g64670	0.0422808	0	11.3215	11.2891	10.1987	0.447365	0.430559	0.509277		soluble inorganic pyrophosphatase, putative, expressed
LOC_Os04g29210	0.0423598	0.025873	0.47201	0.525715	0.528079	0	0.0332086	0.0314241		FAD-binding and arabino-lactone oxidase domains containing protein, putative, expressed
LOC_Os06g11812	0.0423883	0	41.6129	38.6328	42.0624	1.52854	1.77079	1.88509		wound/stress protein, putative, expressed
LOC_Os09g03380	0.0429085	0.0496132	0.31125	0.379164	0.516893	0	0	0.0518037		transposon protein, putative, Mutator sub-class, expressed
LOC_Os01g62610	0.0436153	0	22.4512	21.0722	23.6364	0.553222	1.24236	1.13361	OsFKBP20-1b	peptidyl-prolyl cis-trans isomerase, FKBP-type, putative, expressed
LOC_Os05g13380	0.0441108	0	2.8703	1.87318	1.34848	0	0	0.268722		retrotransposon protein, putative, unclassified, expressed
LOC_Os09g27580	0.0448415	0	1.61308	1.57448	1.19536	0.0709883	0.0555112	0.0700376	OsHAK17, FCO3, FCO4	potassium transporter
LOC_Os06g48170	0.0449755	0	73.4589	81.3639	82.0548	2.13336	4.18694	4.33338	OsXTH18	glycosyl hydrolases family 16, putative, expressed
LOC_Os03g34230	0.0450284	0.000828657	1.48777	0.847357	2.26978	0.0684499	0.0713684	0.0675332		expressed protein
LOC_Os07g46550	0.0452097	0.000347135	1.40241	1.01868	1.79071	0.0617172	0.128697	0	OsANN6	annexin, putative, expressed
LOC_Os07g30760	0.045681	0	12.3223	16.8046	18.4488	0.427812	1.06366	0.681826	UGT709A4	UDP-glucoronosyl and UDP-glucosyl transferase domain containing protein, expressed
LOC_Os04g58310	0.045895	0	23.0163	25.2826	29.0174	0.698901	1.7003	1.14924	OsCBSX12	CBS domain-containing protein, putative, expressed
LOC_Os02g11680	0.0461262	4.29392e-08	0.983366	1.3288	0.879738	0.0878246	0.030523	0.0288828		glucosyltransferase, putative, expressed
LOC_Os05g31670	0.046176	0	436.267	461.362	424.465	15.9517	23.673	21.4244	AWPM-19, PM19, OsPM1, OsPM19L1	AWPM-19-like membrane family protein, putative, expressed
LOC_Os05g37060	0.0462844	0	3.29596	4.12984	4.33697	0.181969	0.0632427	0.299221	OsMYB-1, MYB-1, MYB1, OsARM1, ARM1	MYB family transcription factor, putative, expressed
LOC_Os10g35050	0.0465507	0	1178.67	1333.84	1414.26	97.3594	50.921	34.5137	OsTIP3;1, TIP3-1, TIP3.1, TIP3, OsEnS-139	aquaporin protein; tonoplast intrinsic protein
LOC_Os05g39250	0.0466676	0	331.732	328.4	339.758	14.006	18.1763	14.48		phosphatidylethanolamine-binding protein, putative, expressed
LOC_Os04g24804	0.0467529	0	274.716	289.126	299.2	7.69249	15.4192	17.2381		expressed protein
LOC_Os04g28820	0.0469111	0	121.324	128.025	60.0535	3.95813	6.30341	4.25284		retrotransposon protein, putative, unclassified, expressed
LOC_Os06g14670	0.0470203	0	26.9651	35.0332	31.8368	1.15937	1.10807	2.14471	R2R3-MYB	ODORANT1, putative, expressed
LOC_Os05g18419	0.0475819	0	11.6951	11.8113	9.25022	0.388118	0.404666	0.765841		retrotransposon, putative, centromere-specific
LOC_Os03g12990	0.047641	0	44.2737	42.6838	47.694	2.02164	1.33496	3.05834		phytosulfokines precursor, putative, expressed
LOC_Os02g26720	0.0477475	0	28.0757	30.1427	27.7865	1.23872	1.86133	1.00646	OsITPK4, OsITP5/6K-4, ITP5/6K-4	inositol 1,3,4-trisphosphate 5/6-kinase gene
LOC_Os08g40720	0.0479134	0	47.6933	39.2383	48.3115	0.129595	4.56033	1.79004		FAD-binding and arabino-lactone oxidase domains containing protein, putative, expressed
LOC_Os04g54590	0.0485522	0	30.3416	28.3686	33.1415	2.07418	1.39523	0.990194		expressed protein
LOC_Os02g47200	0.0488952	0	5.32886	4.67901	5.97033	0.286034	0.213021	0.282203	OsAOX1c	alternative oxidase gene
LOC_Os10g25710	0.0494194	7.81066e-06	1.73086	1.20488	1.87596	0.0583983	0.121776	0.0576163		retrotransposon protein, putative, Ty3-gypsy subclass, expressed
LOC_Os07g34070	0.0507904	0	2.56129	3.17829	3.34832	0.150289	0.27422	0.0370691		auxin-induced protein 5NG4, putative, expressed
LOC_Os04g55490	0.0520823	2.86984e-08	1.68915	1.40063	2.81385	0.100572	0.15729	0.0496126		expressed protein
LOC_Os12g08360	0.0527884	1.91241e-08	0.883177	0.895838	1.08513	0	0	0.151194		expressed protein
LOC_Os05g44340	0.0532298	0	57.0393	55.5608	56.0795	2.71629	3.13877	3.12372	Oshsp101, OsHSP101, ClpB-cyt, OsClpB-cyt, ClpB-C/Hsp100, OsClpB-C	ATPase/chaperone/heat shock protein
LOC_Os03g19290	0.0536143	0	433.748	488.823	568.403	21.4951	31.2656	27.1767		mitochondrial import inner membrane translocase subunit Tim17, putative, expressed
LOC_Os06g23570	0.0544225	0	2.52922	2.79628	3.06893	0.200786	0.15701	0.0990488		expressed protein
LOC_Os09g35940	0.0545176	0	15.1365	14.1165	17.3348	0.196422	1.53597	0.807463	OsCYP76M7, OsCYP78C6	cytochrome P450, putative, expressed
LOC_Os07g13830	0.0551162	9.59523e-09	1.19685	1.0254	1.25533	0.0621245	0.129547	0	Os_F0785, OsEnS-103	OsFBX228 - F-box domain containing protein, expressed
LOC_Os03g48030	0.0566955	0.00492737	0.510678	1.06647	0.714175	0	0.0449114	0.0849961		integral membrane HPP family protein, putative, expressed
LOC_Os01g27770	0.0567014	0	9.20761	8.39826	8.01612	0.331533	0.576115	0.545156		expressed protein
LOC_Os11g05170	0.057692	0	43.4516	47.7135	55.4585	2.80085	2.44671	3.21145		expressed protein
LOC_Os03g35640	0.0580401	0	22.112	25.1327	20.6259	0.990723	1.12687	1.82162		retrotransposon protein, putative, unclassified, expressed
LOC_Os07g39700	0.058908	0	52.6019	68.586	77.4566	4.26817	3.70846	3.72513	Sdr4, OsSdr4, OsSdr4-n, OsSdr4-k, OsSdr4L, Sdr4L	Seed dormancy 4
LOC_Os02g43620	0.0591678	0	9.12706	9.86955	8.23793	0.438611	0.685968	0.486829		transporter, major facilitator family, putative, expressed
LOC_Os08g37730	0.0596816	0	20.2205	20.1187	22.578	0.892966	1.45242	1.40961	OsbHLH047	helix-loop-helix DNA-binding protein, putative, expressed
LOC_Os12g03290	0.060459	0	16.1884	16.6075	17.9083	0.932223	0.859819	1.27348	AP2/EREBP#155	AP2 domain containing protein, expressed
LOC_Os08g11200	0.0607346	9.0119e-10	0.642354	0.681544	0.228203	0.041947	0.0109339	0.0413853		retrotransposon protein, putative, unclassified, expressed
LOC_Os05g06399	0.06074	0	284.405	309.063	324.836	12.8027	20.0889	22.8863		expressed protein
LOC_Os10g33190	0.0611314	0	479.695	531.738	586.647	21.8507	34.8539	40.9883		expressed protein
LOC_Os11g26570	0.0612932	0	1440.02	1434.71	1346.99	69.2928	99.6122	89.8577	OsLEA25, OsEnS-143	dehydrin, putative, expressed
LOC_Os05g18446	0.0618668	0	33.6697	35.0842	31.3748	1.83074	2.34928	2.01463		retrotransposon protein, putative, Ty3-gypsy subclass, expressed
LOC_Os07g02430	0.0620431	0	5.73522	5.2145	8.42982	0.355413	0.535263	0.311692	OsSTA185	expressed protein
LOC_Os09g10620	0.0620991	0	13.8979	19.2098	22.7569	1.31564	1.05518	1.09832		seed maturation protein LEA 4, putative, expressed
LOC_Os03g26490	0.0623084	0	93.0271	103.207	122.939	4.25725	8.09422	7.53572	OsEnS-46	expressed protein
LOC_Os01g63010	0.0623788	0	42.7395	45.4855	56.7591	3.46082	3.08793	2.49519		universal stress protein domain containing protein, putative, expressed
LOC_Os04g55780	0.0630317	0.0132316	0.715276	0.871347	1.3129	0.0603325	0.0629048	0.0595245		expressed protein
LOC_Os01g59100	0.06376	0	26.8726	29.6902	34.0318	1.41723	2.55748	1.80159	OsEnS-18	cytokinin-N-glucosyltransferase 1, putative, expressed
LOC_Os03g20680	0.0641337	0	818.473	864.076	873.128	39.7216	55.0129	69.1706	OsLEA17, OsLEA3-2, LEA3-2	Late embryogenesis abundant protein gene
LOC_Os01g64000	0.0647207	0	18.6076	16.6677	18.9293	1.32281	1.34637	0.838987	OsABI5, OsbZIP10, OsABF1, OREB1, OsABI5-1, OsABI5-2, OsOREB1, OREB1	bZIP transcription factor;ABRE binding factor
LOC_Os08g09890	0.0647599	0	0.975822	1.12968	1.2905	0.0644158	0.134325	0.0211844		expressed protein
LOC_Os04g52110	0.06521	0	340.464	349.535	369.74	17.9824	26.5339	24.5893	OsLEA18	late embryogenesis abundant protein, group 3, putative, expressed
LOC_Os06g23350	0.0653575	0	71.8671	79.4067	76.5794	1.71277	4.77964	8.39948	OsLEA33, D34, OsEnS-85	late embryogenesis abundant protein D-34, putative, expressed
LOC_Os11g14040	0.0654341	0	9.29073	9.6026	9.00272	0.668298	0.497708	0.659348	OsGSTZ4	glutathione S-transferase, N-terminal domain containing protein, expressed
LOC_Os08g32060	0.0663211	3.49298e-12	0.848105	1.34031	1.37038	0.046402	0.120951	0.0686708	OsPUB5	spotted leaf 11, putative, expressed
LOC_Os05g43460	0.0671471	0	4.46112	5.29075	6.18104	0.222986	0.406863	0.439999		DUF567 domain containing protein, putative, expressed
LOC_Os12g42730	0.0684551	0	353.007	362.357	278.527	19.3352	24.0453	24.6564		mov34/MPN/PAD-1 family protein, expressed
LOC_Os01g46580	0.0696692	0	178.763	199.07	248.021	13.7269	14.4503	15.4255		actin-related protein 2/3 complex subunit 2, putative, expressed
LOC_Os01g64120	0.0697532	0	7.93663	11.7862	8.13945	0.357036	1.11678	0.469673		2Fe-2S iron-sulfur cluster binding domain containing protein, expressed
LOC_Os06g07220	0.0704775	0	5008.78	5169.16	5551.7	211.702	453.024	443.861		LTPL128 - Protease inhibitor/seed storage/LTP family protein precursor, expressed
LOC_Os05g05930	0.0705405	0	54.7821	67.9534	60.9883	3.74658	5.11373	4.09965		peripheral-type benzodiazepine receptor, putative, expressed
LOC_Os09g16030	0.0708802	0	2.91987	4.06512	3.42478	0.31779	0.231937	0.18812		cytokinin-O-glucosyltransferase 1, putative, expressed
LOC_Os03g51350	0.0716271	0	394.206	430.753	386.62	19.3144	33.8293	33.6381	OsEnS-53	expressed protein
LOC_Os04g56240	0.0717909	0	13.0429	15.985	16.1438	1.09083	1.02068	1.13141		lipase, putative, expressed
LOC_Os04g18710	0.0718307	0	6.68576	7.38228	4.51376	0.622272	0.405502	0.306969		retrotransposon protein, putative, Ty3-gypsy subclass, expressed
LOC_Os08g22604	0.071979	0	205.351	230.824	237.732	11.6963	18.4195	18.3913		expressed protein
LOC_Os04g55100	0.072055	0	10.6075	10.6501	10.6979	0.722666	0.968757	0.611133		expressed protein
LOC_Os06g07420	0.0724576	0.00145035	0.297555	0.57701	0.334387	0.0215128	0.0448601	0.0212247		retrotransposon protein, putative, unclassified, expressed
LOC_Os03g21650	0.0727216	1.01995e-09	3.83942	4.76069	6.66976	0.36433	0.506485	0.239634		expressed protein
LOC_Os04g56230	0.0727768	0	7.48423	8.66056	9.31118	0.983819	0.512882	0.355903		polyprenyl synthetase, putative, expressed
LOC_Os01g27760	0.0733591	0	5.27971	5.75975	4.46322	0.319046	0.582136	0.23608		expressed protein
LOC_Os01g66730	0.0738337	0	12.865	12.9809	12.5849	0.569973	1.14284	1.12468		exosome complex exonuclease RRP40, putative, expressed
LOC_Os02g33380	0.0739372	0	19.8745	22.1087	24.7287	1.11759	2.19339	1.62151		pectinesterase inhibitor domain containing protein, putative, expressed
LOC_Os01g45380	0.0742907	0	30.0938	31.0855	29.6318	2.1921	2.45613	2.09819		protein kinase domain containing protein, expressed
LOC_Os08g11190	0.0754945	2.22148e-06	0.666088	0.667688	0.810417	0.0539362	0.0281179	0.0798208		retrotransposon protein, putative, unclassified, expressed
LOC_Os04g03810	0.0756721	0	6.68595	6.50955	5.02257	0.16004	0.429077	0.789483	OsSub38, SUB38	OsSub38 - Putative Subtilisin homologue, expressed
LOC_Os03g04080	0.0762865	0	97.8143	120.667	135.15	5.23627	6.71942	15.0216		expressed protein
LOC_Os08g30540	0.0764506	0	206	221.107	218.623	11.5509	14.9256	22.8899		expressed protein
LOC_Os04g10590	0.0765982	0	2.57551	2.75912	2.73644	0.135423	0.282393	0.200413		retrotransposon protein, putative, unclassified, expressed
LOC_Os08g40180	0.0772973	0	274.719	300.084	311.447	18.4022	24.4838	25.6186	HMGR III, Hmg3, HMGR3, HMGR 3, OsHMGR3	3-hydroxy-3-methylglutaryl-coenzyme A reductase, putative, expressed
LOC_Os02g06560	0.0774012	0	38.4481	59.3467	69.0378	4.01855	2.42572	6.46877		wound induced protein, putative, expressed
LOC_Os04g35810	0.0775496	0	4.99626	6.08643	6.01675	0.468252	0.488217	0.369585		expressed protein
LOC_Os07g09190	0.0777186	0	4.08089	4.72783	4.30067	0.118017	0.512704	0.388122	OsDXS, OsDXS3, dxs3	transketolase, putative, expressed
LOC_Os03g07180	0.0779207	0	363.705	398.964	346.321	26.5379	35.0328	24.8426	OsLEA16	embryonic protein DC-8, putative, expressed
LOC_Os02g26470	0.0779304	0	238.755	231.631	293.342	17.0244	20.7808	21.7124		expressed protein
LOC_Os04g56309	0.07829	0	20.3042	24.2967	29.1175	0.909359	1.99107	2.87098		expressed protein
LOC_Os02g36300	0.0783626	0	2.93416	4.52903	4.19258	0.172168	0.359018	0.382191		zinc finger, C3HC4 type domain containing protein, expressed
LOC_Os12g42830	0.078456	9.34757e-08	0.845326	0.943537	0.886632	0.0885128	0.0922867	0.0291092		expressed protein
LOC_Os07g46320	0.0788092	0.000497492	1.63492	1.06696	0.589464	0.103427	0.0539184	0.102042		uncharacterized UPF0114 domain containing protein, expressed
LOC_Os04g51172	0.0797754	0	7.90091	8.10515	6.61505	0.911957	0.511991	0.380661	OsBRXL3	BREVIS RADIX-like homologous gene in rice
LOC_Os02g36600	0.0797771	0	119.907	128.319	145.78	8.18653	16.6982	6.54778		aldose 1-epimerase, putative, expressed
LOC_Os03g19120	0.0799989	7.33527e-11	2.33112	1.83909	3.09704	0.262169	0.164008	0.155195		MYB family transcription factor, putative, expressed
LOC_Os04g49980	0.0800349	0	1554.68	1470.3	1623.62	97.932	151.186	122.932	OsLEA1	late embryogenesis abundant group 1, putative, expressed
LOC_Os01g03680	0.08013	0	9.6907	9.29987	9.75295	0.396886	1.12319	0.783142		BBTI8 - Bowman-Birk type bran trypsin inhibitor precursor, expressed
LOC_Os02g21330	0.080402	0.000239788	0.972166	1.57905	0.906373	0.164002	0.113996	0		expressed protein
LOC_Os01g12580	0.0810737	0	108.96	108.992	120.532	7.96446	11.3535	8.12417	Lea14A, OsLEA5, OsEnS-2	late embryogenesis abundant protein, putative, expressed
LOC_Os03g03520	0.081314	0.0102785	0.757351	1.66947	1.94176	0	0.355227	0		expressed protein
LOC_Os09g15700	0.0818382	0	6.55035	8.13465	7.20021	0.601134	0.718935	0.470978		receptor-like protein kinase 5 precursor, putative, expressed
LOC_Os08g01950	0.0824976	1.04448e-06	0.637444	1.01425	1.01881	0.0921728	0.128137	0		transferase family protein, putative, expressed
LOC_Os02g50700	0.0828962	0	130.68	129.249	130.249	8.19743	14.5615	9.58536		expressed protein
LOC_Os09g35560	0.0844613	3.14797e-05	1.5397	2.9317	2.08992	0.091674	0.191165	0.271339		expressed protein
LOC_Os06g20020	0.0844815	0	3.56482	2.73565	2.5227	0.30431	0.226632	0.214453		ZOS6-03 - C2H2 zinc finger protein, expressed
LOC_Os02g15740	0.084638	0	193.249	199.299	216.497	12.049	22.1388	17.3604		expressed protein
LOC_Os08g36440	0.0854791	0	164.565	186.45	196.34	11.9849	19.2204	15.5821	OsEnS-122	HVA22, putative, expressed
LOC_Os01g62605	0.0855114	0.0158688	0.8241	1.2047	1.90161	0.166828	0.0869703	0.0822968		expressed protein
LOC_Os01g43530	0.0858663	4.54088e-11	4.10987	4.07683	7.65149	0.207997	0.43373	0.71824	OsLEA6	late embryogenesis abundant protein, putative, expressed
LOC_Os12g22489	0.0868467	0	441.518	476.038	477.8	28.7534	46.811	45.6177		expressed protein
LOC_Os05g03130	0.0876384	0	167.204	163.527	204.498	11.8477	17.312	17.7469	OsRCI2-7	OsRCI2-7 - Putative low temperature and salt responsive protein, expressed
LOC_Os12g12590	0.0878634	0.000319236	1.57223	0.609763	0.895198	0.0909359	0	0.179436		NADP-dependent oxidoreductase, putative, expressed
LOC_Os10g41480	0.0880231	0	21.1243	19.8624	21.8673	1.9533	1.92748	1.65183		phospho-2-dehydro-3-deoxyheptonate aldolase, chloroplast precursor, putative, expressed
LOC_Os04g56210	0.088307	0	3.41185	2.83385	3.6599	0.23546	0.368249	0.271025	OsFPPS3	polyprenyl synthetase, putative, expressed
LOC_Os04g32430	0.0883287	0.0149224	1.62257	1.56391	2.61824	0	0.26344	0.249284		expressed protein
LOC_Os01g04660	0.0885936	0	22.4739	21.4483	20.8575	1.92327	2.21271	1.60307		lipid phosphatase protein, putative, expressed
LOC_Os11g39920	0.0889161	0.0102686	0.433909	0.35769	0.263485	0	0.0482021	0.0456119		expressed protein
LOC_Os02g09320	0.0892573	0	8.36873	9.02605	8.5248	0.488023	0.690555	1.13493	OsEnS-28	cytochrome P450, putative, expressed
LOC_Os03g20480	0.0893704	0	9.82493	13.8312	13.6173	1.50945	1.29608	0.525613		expressed protein
LOC_Os05g48140	0.0895507	2.75946e-10	0.699946	0.852672	0.428253	0.0737993	0.0307783	0.0728109		expressed protein
LOC_Os12g05890	0.08989	0	4.01463	4.19195	5.75889	0.537821	0.186917	0.530618		expressed protein
LOC_Os02g29960	0.0899764	0	5.51586	6.07421	5.94345	0.366102	0.699803	0.511698		cytochrome P450, putative, expressed
LOC_Os05g50110	0.0900524	0	141.163	165.118	201.959	10.1403	19.4136	16.2143		oleosin, putative, expressed
LOC_Os12g06130	0.0900568	3.14369e-11	2.78958	3.28622	3.67611	0.361995	0.301943	0.214288		expressed protein
LOC_Os04g20749	0.0901696	0	65.9143	74.622	72.0218	3.9662	7.18756	8.01251		expressed protein
LOC_Os02g04780	0.0912366	0	43.2824	42.6486	40.4091	2.54849	4.42857	4.54979		expressed protein
LOC_Os02g54140	0.0917506	0	44.255	48.9085	53.9553	4.08379	5.32239	4.09206	OsHSP18.0-CIII	hsp20/alpha crystallin family protein, putative, expressed
LOC_Os07g28480	0.0918056	0	78.1174	67.764	78.3953	6.08223	7.12206	7.38557	OsGSTU46	glutathione S-transferase, putative, expressed
LOC_Os08g11180	0.0921475	0.0155609	0.363858	0.337715	0.212021	0	0.0639988	0.0201866		retrotransposon protein, putative, unclassified, expressed
LOC_Os05g35360	0.0921648	0	5.46288	6.32269	4.53322	0.466337	0.55568	0.482001	OsBgal6, OsBGal6	beta-galactosidase 7 precursor, putative, expressed
LOC_Os10g25340	0.0922195	0	2.16795	3.04907	2.22748	0.0895657	0.42023	0.176733		GDSL-like lipase/acylhydrolase, putative, expressed
LOC_Os09g39330	0.0923192	8.72198e-09	0.690288	0.65718	0.873081	0.0821997	0.0214261	0.101374		retrotransposon protein, putative, unclassified, expressed
LOC_Os06g22080	0.0929747	0	126.299	144.647	136.275	10.6605	13.0602	14.1405		diacylglycerol O-acyltransferase, putative, expressed
LOC_Os08g36500	0.0933985	6.18356e-06	0.4594	0.373093	0.481848	0.0688883	0.0538691	0	OsNIA2, NIA2	nitrate reductase, putative, expressed
LOC_Os12g42200	0.0938152	0	1.45945	1.44675	1.31762	0.112194	0.136474	0.147589		ATCHX, putative, expressed
LOC_Os03g06180	0.0938497	0	182.591	176.249	160.497	11.233	22.6136	14.8929		expressed protein
LOC_Os03g55100	0.0941289	0	17.7	18.7676	16.7228	1.8008	1.58872	1.61724	OsCNGC7, OsCNGC14	cyclic nucleotide-gated ion channel 2, putative, expressed
LOC_Os02g48094	0.0942495	0	8.40043	8.27497	11.3046	0.962577	0.724835	0.949686		expressed protein
LOC_Os08g34780	0.0948117	1.0479e-11	0.996278	1.16125	1.09356	0.16416	0.0978055	0.0462749		adenylyl cyclase-associated protein, putative, expressed
LOC_Os07g34520	0.0948568	0.00100784	0.338003	0.441165	0.354519	0.0641475	0.0222942	0.0210961	OsEnS-107, EnS-107, OsI85, I85, ICL, Osl85, l43, Osl43, OsL85	isocitrate lyase, putative, expressed
LOC_Os06g23590	0.0965281	0.00153042	2.09372	1.8004	2.58356	0.249321	0.129976	0.245982		expressed protein
LOC_Os09g30438	0.0966614	0	26.4725	28.2115	19.3815	1.27252	2.42825	3.45849		expressed protein
LOC_Os07g09050	0.0969462	0	16.2576	18.8741	14.5906	1.28392	2.16417	1.37229		exostosin family protein, putative, expressed
LOC_Os08g36390	0.0976537	0	1.60797	1.98426	2.29982	0.147959	0.257113	0.170308	OsIDD12	ZOS8-07 - C2H2 zinc finger protein, expressed
LOC_Os01g12560	0.0977993	0	20.5975	25.2752	35.1276	2.09305	2.22508	3.60365		3-methyl-2-oxobutanoate hydroxymethyltransferase, putative, expressed
LOC_Os11g03540	0.0981526	0	9.17246	10.4943	11.367	1.10307	1.27789	0.665072	AP2/EREBP#131	AP2 domain containing protein, expressed
LOC_Os03g14180	0.100583	0	47.2251	43.3019	58.9324	6.09177	5.56336	3.37799	OsHSP26, Oshsp26, OsHSP26.7	rice heat shock protein gene
LOC_Os05g45870	0.100873	3.46926e-06	0.6453	0.729952	0.761435	0.0544301	0	0.161103	OsFbox269, Os_F0444	OsFBL25 - F-box domain and LRR containing protein, expressed
LOC_Os02g04369	0.101228	0	73.7419	71.7161	80.3256	5.26129	9.28897	8.30533		expressed protein
LOC_Os03g63930	0.102126	0	33.8717	32.675	45.7739	4.06593	3.24488	4.16005		acyl carrier protein, putative, expressed
LOC_Os01g55560	0.102357	0	37.5788	36.332	37.2878	2.61627	4.23861	4.52709		ABIL3, putative, expressed
LOC_Os07g20340	0.102654	0	96.649	97.9757	94.4052	8.75996	9.85563	11.0545	OsEnS-104	heavy metal-associated domain containing protein, expressed
LOC_Os11g19730	0.102724	0	40.4876	47.3328	37.5669	2.94121	4.15696	5.78214		expressed protein
LOC_Os02g57400	0.102882	0	180.359	184.337	151.806	17.4906	18.6862	16.9617	Lpa1, OsLpa1, OsLpa1.1, OsLpa1.2, OsLpa1.3, Oslpa1	2-phosphoglycerate kinase-related, putative, expressed
LOC_Os12g06290	0.102889	0	8.06625	8.27212	11.2805	0.874769	0.912066	1.05484		expressed protein
LOC_Os05g50100	0.103442	0	9.0162	9.09852	10.2819	0.85748	1.5965	0.483427		expressed protein
LOC_Os06g19630	0.103597	0	18.4746	18.9787	16.4129	1.3955	1.86725	2.31763		steroid nuclear receptor, ligand-binding, putative, expressed
LOC_Os06g15480	0.103769	0	22.8096	24.5784	27.6384	1.65162	2.52809	3.6057	OsbZIP47	bZIP transcription factor
LOC_Os04g40590	0.103906	2.79439e-11	1.44005	2.10511	2.50297	0.208227	0.173684	0.246526	OsWS1, WS1	wax synthase isoform 1, putative, expressed
LOC_Os02g32600	0.104192	1.0479e-11	1.73091	1.68126	2.91322	0.162976	0.254887	0.24119		expressed protein
LOC_Os06g36680	0.104392	1.08282e-10	0.944356	1.08986	1.38149	0.0503084	0.15736	0.148904		homeobox domain containing protein, expressed
LOC_Os02g32380	0.104803	9.41359e-09	3.40192	4.02581	5.82798	0.344337	0.47869	0.566209		expressed protein
LOC_Os04g47360	0.105206	0	1.54466	1.42087	1.65871	0.13029	0.135845	0.220362	OsPOP9, POP9	OsPOP9 - Putative Prolyl Oligopeptidase homologue, expressed
LOC_Os07g36610	0.105402	0	17.576	16.7939	19.0528	1.37153	2.25899	2.00032	OsCslF9, OsCSLF9	CSLF9 - cellulose synthase-like family F%3B beta1,3%3B1,4 glucan synthase, expressed
LOC_Os03g59290	0.1062	0	18.5349	17.3549	15.2293	0.708843	2.80845	1.91156		C-methyltransferase, putative, expressed
LOC_Os01g53330	0.106376	0	4.58852	6.1873	6.6932	0.307577	1.18656	0.36415		anthocyanidin 5,3-O-glucosyltransferase, putative, expressed
LOC_Os01g49020	0.107283	6.90393e-06	1.76353	2.09252	2.18601	0.24341	0.0845961	0.320201	OsSUI3	expressed protein
LOC_Os07g22460	0.107352	0	7.78045	10.7	7.66303	0.768316	0.901208	1.13704		expressed protein
LOC_Os06g43950	0.108062	1.90577e-07	3.66086	4.43417	5.68282	0.741092	0.309076	0.4387		expressed protein
LOC_Os09g10860	0.108078	6.14719e-05	3.86674	4.99885	3.28317	0.372747	0.38864	0.551633		expressed protein
LOC_Os01g10370	0.10902	2.32972e-07	1.27468	1.33098	2.00544	0.14887	0.206956	0.146876	OsERF#039, OsERF039, OsERF39, AP2/EREBP#002, AP2/EREBP2	AP2 domain containing protein, expressed
LOC_Os07g49210	0.109128	0	14.3632	16.0517	11.3493	1.38414	1.57876	1.59474		helicase conserved C-terminal domain containing protein, expressed
LOC_Os01g56430	0.109807	0.00378279	0.939827	2.49795	1.3442	0.259439	0.180334	0.0853215	COPT2, OsCOPT2	copper transporter gene
LOC_Os02g22290	0.109916	2.26834e-08	1.65435	2.38265	1.85486	0.115483	0.36122	0.170905		retrotransposon protein, putative, Ty3-gypsy subclass, expressed
LOC_Os08g34500	0.109984	0	5.92127	5.40423	7.03869	0.665934	0.740615	0.613215		expressed protein
LOC_Os03g57080	0.109988	0	6.58927	7.22054	9.22765	0.622979	0.573124	1.33774	OspPLAIIIgamma, pPLAIIIgamma	PLA IIIA/PLP7, putative, expressed
LOC_Os06g48300	0.110173	0	84.8713	80.6819	81.5675	5.04583	11.3111	10.8692	OsPP2C59, PP2C59, OsPP91	protein phosphatase 2C, putative, expressed
LOC_Os08g32680	0.110182	0	5.06237	5.72647	2.21239	0.320253	0.445209	0.667034		retrotransposon protein, putative, Ty3-gypsy subclass, expressed
LOC_Os12g44270	0.110224	0	81.4377	75.9518	101.148	6.22398	13.137	9.13605		glycine-rich protein, putative, expressed
LOC_Os03g42730	0.110313	0	2.868	3.74334	2.44411	0.317509	0.189169	0.49226		expressed protein
LOC_Os04g41960	0.110425	0	18.1471	17.2902	16.3267	2.25081	1.76008	1.70515	OsNADPH1, NADPH1	NADP-dependent oxidoreductase, putative, expressed
LOC_Os09g31190	0.110471	0.0213912	1.69974	0.93961	2.09741	0.101203	0.422071	0		slowmo homolog, putative, expressed
LOC_Os11g07911	0.110561	0	149.786	185.322	204.436	13.7754	22.5101	23.3669		expressed protein
LOC_Os04g18860	0.11125	9.00324e-07	0.55881	0.630171	0.656449	0.0452494	0.0707679	0.0892867		retrotransposon protein, putative, Ty3-gypsy subclass, expressed
LOC_Os10g29470	0.111418	0	5.13682	6.03417	7.55791	0.722138	0.865866	0.498727	OsCAD3	dehydrogenase, putative, expressed
LOC_Os01g72470	0.112368	3.09586e-06	2.20957	2.21103	3.18661	0.0931868	0.4858	0.275816		expressed protein
LOC_Os11g32890	0.112856	0	44.7551	46.3784	50.9189	3.83785	6.71677	5.47683		expressed protein
LOC_Os06g30730	0.113017	0	32.0383	33.9595	32.1015	2.09648	3.51134	5.47907	OsABCG14	ABC-2 type transporter domain containing protein, expressed
LOC_Os06g23600	0.113978	0.000203334	2.27571	2.22292	0.846967	0.148608	0.387361	0.0733091		expressed protein
LOC_Os02g06410	0.114295	0	47.8267	48.2049	55.5087	3.85899	4.97961	8.48164	OsCBSX9	CBS domain containing membrane protein, putative, expressed
LOC_Os04g38400	0.1147	0	2.83544	3.13484	4.46099	0.337645	0.484057	0.374764		ethylene-insensitive 3
LOC_Os05g02240	0.115662	0	5.36048	5.21332	5.05408	0.705155	0.735221	0.367181		ATCHX20, putative, expressed
LOC_Os02g49410	0.116886	0	3.99871	4.10905	4.12753	0.513959	0.535872	0.380307	OsHAP3K/OsNF-YB1, OsHAP3K, OsNF-YB1, nf-yb1, OsLEC1, OsNF-YB-1, NFYB1, OsEnS-41	HAP3 subunit of the CCAAT-box-binding transcription factor; Nuclear Factor Y gene; Histone Fold Protein
LOC_Os12g42280	0.116909	0	2.9799	2.77084	2.28139	0.154112	0.459095	0.325818	OSNCED2, OsNCED2, OsNCED5, NCED5	9-cis-epoxycarotenoid dioxygenase
LOC_Os08g36700	0.117094	0	3.46562	4.68901	4.71009	0.395249	0.721177	0.389956	HSfB4a, OsHsfB4a, OsHsf-20, HSF20	heat shock transcription factor gene
LOC_Os07g13980	0.117199	0	29.3448	28.9269	27.2077	2.39997	3.55027	4.06782	OsAGPL4, APL4, OsAPL4, OsSTA193	large subunit of ADP-glucose pyrophosphorylase
LOC_Os01g56050	0.117549	4.36274e-09	1.112	1.92184	1.60873	0.232871	0.1214	0.19146		MATE efflux family protein, putative, expressed
LOC_Os05g34940	0.118167	2.99153e-05	0.491075	0.712174	0.68676	0.0552286	0.0863749	0.0817334	OsMADS4, PI1	MADS-box gene
LOC_Os03g07100	0.118296	0	175.12	178.294	175.003	15.562	20.835	26.1127	OsLTPG2, OsLTPg2, LTPL82	LTPL82 - Protease inhibitor/seed storage/LTP family protein precursor, expressed
LOC_Os01g50000	0.11836	0.00183939	1.39697	1.54984	1.55681	0	0.184285	0.348763		expressed protein
LOC_Os02g47280	0.118515	0	29.9867	30.465	25.2636	2.36254	4.10544	3.69059	OsGRF4, GRF4, GS2/OsGRF4, PT2, GLW2	growth-regulating factor; GRAIN SIZE ON CHROMOSOME 2
LOC_Os11g38330	0.120012	0.0371705	0.211332	0.250088	0.132995	0.0142604	0.0148684	0.0422083		ZOS11-06 - C2H2 zinc finger protein, expressed
LOC_Os01g05150	0.120042	0	6.46959	8.93449	8.97466	1.12661	1.17464	0.62523		expressed protein
LOC_Os03g24170	0.120052	0.00144719	0.524512	0.461204	0.434322	0.0279422	0.0874007	0.055136		phosphatidylinositol-4-phosphate 5-kinase, putative, expressed
LOC_Os01g18230	0.120526	0.0107685	0.750559	1.39326	2.09929	0.168823	0.176021	0.166562		FAD-linked oxidoreductase protein, putative, expressed
LOC_Os01g69080	0.120711	0	249.27	243.297	251.519	27.6024	30.0997	32.117	OsSSI2	fatty-acid desaturase gene
LOC_Os09g29780	0.120809	0	43.2553	48.4654	42.2718	4.77148	5.46694	5.94913		expressed protein
LOC_Os12g36680	0.121132	0	23.7848	24.25	20.4112	2.3237	2.90169	3.06565		expressed protein
LOC_Os12g44190	0.121541	0	6.64762	5.31131	7.19827	1.22586	0.51125	0.591282		ATPase 3, putative, expressed
LOC_Os04g55800	0.121872	0	40.5043	42.9202	41.1998	4.58127	6.84809	3.75891	OsSultr3;3, OsSul3;3, SULTR3;3	sulfate transporter, putative, expressed
LOC_Os06g09240	0.12373	4.40116e-10	1.11807	2.17924	2.50176	0.301783	0.117994	0.297742	UGT	anthocyanidin 3-O-glucosyltransferase, putative, expressed
LOC_Os04g41759	0.123954	0	7.4164	6.77598	9.5025	0.469172	1.28964	1.17826		expressed protein
LOC_Os01g54430	0.124021	7.86271e-08	1.53908	2.35319	1.55663	0.111273	0.290044	0.274458	OsENODL1, OsELA1, ELA1	plastocyanin-like domain containing protein, putative, expressed
LOC_Os12g05330	0.124317	0	15.3024	17.8131	16.9333	1.51924	2.47261	2.23006		protein of unknown function containing protein, expressed
LOC_Os03g29340	0.125047	0	27.0295	26.2304	25.2088	2.1994	3.61021	4.00268		domain of unknown function domain containing protein, expressed
LOC_Os01g53990	0.12597	0	15.569	20.5003	21.1253	1.90556	1.98681	3.31246	OsPME5	pectinesterase, putative, expressed
LOC_Os07g45180	0.126	0	3.63554	4.25499	3.62462	0.384158	0.548103	0.518649		transposon protein, putative, unclassified, expressed
LOC_Os10g30560	0.126243	0	7.20266	6.8233	8.13338	0.764316	1.13406	0.899096		UDP-glucoronosyl and UDP-glucosyl transferase domain containing protein, expressed
LOC_Os05g46480	0.128715	0	1695.66	1706.9	1841.86	207.41	261.275	206.352	OsLEA3-1, OsLea3-1, LEA3, OsLEA3, OsLEA19, OsLEA19a, OsLEA19b, OsLEA3, Oslea3, oslea3	Late embryogenesis abundant protein gene
LOC_Os05g36186	0.128735	0	10.8722	10.8296	13.5041	1.37558	1.5852	1.57145		expressed protein
LOC_Os01g12640	0.128919	0	33.2721	38.1311	43.2322	3.76475	5.13852	5.87539		expressed protein
LOC_Os02g48570	0.131836	0	15.5033	11.3317	16.3037	2.45706	2.10974	1.12041	OsNRT1.5B	peptide transporter PTR2, putative, expressed
LOC_Os04g19740	0.132307	0	132.013	126.769	112.225	13.3753	18.3265	17.3851		transketolase, chloroplast precursor, putative, expressed
LOC_Os03g32490	0.132926	0	8.89036	8.24106	9.03932	1.28552	1.19673	0.996527		DUF1230 domain containing protein, expressed
LOC_Os04g36750	0.134182	7.85921e-10	2.18906	8.15458	3.22685	0.359308	0.811692	0.649909		hsp20/alpha crystallin family protein, putative, expressed
LOC_Os06g13730	0.135418	0.0222893	0.883243	0.99911	1.4668	0	0.23303	0.220508	OsGLR3.4	glutamate receptor precursor, putative, expressed
LOC_Os08g25070	0.135489	0	10.2108	10.8323	18.0779	1.3229	2.6724	1.30518		PME/invertase inhibitor, putative, expressed
LOC_Os06g43510	0.135961	0	1.31879	1.28368	1.12534	0.135748	0.259482	0.111608		cytochrome P450 71D6, putative, expressed
LOC_Os03g53400	0.136007	0	2.38564	3.79314	3.24151	0.384158	0.572195	0.324868		transmembrane BAX inhibitor motif-containing protein, putative, expressed
LOC_Os04g18900	0.137863	1.49678e-07	0.674218	0.782219	0.471442	0.0568693	0.059294	0.14962		retrotransposon protein, putative, unclassified, expressed
LOC_Os01g68370	0.138569	0	68.2181	79.458	59.7494	7.54246	11.2215	9.97879	Vp1* (OSVP1), OsVP1, OsVp1, Vp1, ABI3, OsLFL4, OsVp-1, OSVP1	B3 domain-containing protein
LOC_Os04g40510	0.139044	0	15.4594	21.2624	18.838	2.5714	2.95122	2.20264		glycosyl hydrolase family 5 protein, putative, expressed
LOC_Os02g30300	0.140518	3.49298e-12	2.2127	1.69156	2.65236	0.359944	0.166796	0.394582		MYND finger family protein, expressed
LOC_Os02g45570	0.140532	0	63.5856	66.7547	84.2324	8.08871	10.9324	11.1331	OsGRF10	growth regulating factor
LOC_Os10g09850	0.140758	0	90.3939	96.7266	78.1067	9.79567	14.5495	12.9877	OsDSR-1, DSR-1	calcium-binding protein
LOC_Os04g18910	0.140872	0.000872782	0.528204	0.482592	0.277007	0.0445532	0.0929056	0.0439565		retrotransposon protein, putative, Ty3-gypsy subclass, expressed
LOC_Os11g07600	0.14141	0	16.3943	16.9327	15.7558	2.05818	3.0043	1.87832	OsABCG27	ABC-2 type transporter domain containing protein, expressed
LOC_Os11g30910	0.142155	0	12.1051	12.8057	13.8296	0.739657	2.51476	2.25271	STV11, OsSOT1	sulphotransferase;resistance to rice stripe virus
LOC_Os12g36240	0.142485	0	42.168	69.3199	83.0135	6.12866	11.8671	9.71772		inhibitor I family protein, putative, expressed
LOC_Os05g43390	0.142857	0	4.20865	4.31003	4.64067	0.491529	0.768729	0.619653		signal recognition particle 54 kDa protein, putative, expressed
LOC_Os11g10590	0.143025	0	536.393	607.649	806.317	62.8163	107.834	108.3	OsDT11	expressed protein
LOC_Os03g10440	0.14321	7.84873e-09	0.770535	1.10628	1.06074	0.0731176	0.203294	0.144277		glycosyl hydrolase family 10 protein, putative, expressed
LOC_Os01g65670	0.143475	0	26.6236	23.7818	36.1912	4.86821	3.37293	4.18327	OsAAP10D, AAP10D, OsAAP6, AAP6, qPC1	amino acid permease
LOC_Os07g37350	0.143782	0	44.9065	50.8262	55.3052	5.38957	8.72741	7.59963		armadillo/beta-catenin repeat family protein, putative, expressed
LOC_Os04g49280	0.144075	3.84304e-05	1.29956	0.842252	1.03405	0.181434	0.141877	0.134253		retrotransposon protein, putative, unclassified, expressed
LOC_Os06g37010	0.144678	0	8.55318	7.80607	9.2108	1.18956	1.20583	1.30404	OsZIP10	ZRT- and IRT-like protein; metal cation transporter
LOC_Os03g48610	0.14473	0	2.43356	2.22734	1.98525	0.212869	0.53901	0.210019		galactosyltransferase family protein, putative, expressed
LOC_Os06g05320	0.144839	0	5.39918	5.11565	5.73292	0.573483	0.914487	0.865345		transferase family protein, putative, expressed
LOC_Os03g15530	0.145733	0	48.437	46.2921	51.697	8.8024	6.94455	5.59211		expressed protein
LOC_Os04g47330	0.145783	0.00688842	0.794403	0.893298	3.07651	0.185557	0.386937	0.122048		rho-GTPase-activating protein-related, putative, expressed
LOC_Os01g49024	0.14646	1.01314e-07	2.34964	1.87922	1.31088	0.303609	0.158277	0.349466		shortened uppermost internode;phosphatidyl serine synthase
LOC_Os03g46350	0.147701	0.000184782	1.02123	1.17859	1.18388	0.108808	0.283617	0.107351		transcription factor, putative, expressed
LOC_Os03g11490	0.147975	0	5.60795	5.83982	3.38611	0.567627	0.991712	0.635704		expressed protein
LOC_Os07g43316	0.148258	0	30.3157	33.5249	24.8221	4.06947	4.58483	4.49068		SAP domain-containing protein, putative, expressed
LOC_Os04g43650	0.149358	0	11.9919	10.7655	12.3094	1.51725	1.96777	1.7525		L-allo-threonine aldolase, putative, expressed
LOC_Os09g34890	0.150121	0.000148418	2.01118	1.16667	1.87507	0.150791	0.23583	0.371929		expressed protein
LOC_Os03g20380	0.150303	0	31.0807	30.8331	32.9404	3.79965	5.36539	5.09183	OsCK1, CIPK31, OsCIPK31, Os-CIPK3	CAMK_KIN1/SNF1/Nim1_like.2 - CAMK includes calcium/calmodulin depedent protein kinases, expressed
LOC_Os04g35940	0.150453	0	2.28207	2.66739	2.21496	0.310281	0.359456	0.408168	OsFbox211, Os_F0331	OsFBX135 - F-box domain containing protein, expressed
LOC_Os01g47130	0.1507	0	11.8035	12.0871	11.9822	1.76713	2.12285	1.51605	Os_F0640	expressed protein
LOC_Os06g42000	0.150709	0	213.452	203.278	224.662	27.1948	36.3895	33.0794	OsPrxII E1, PrxII E1, OsPrxIIE1, PrxIIE1	peroxiredoxin, putative, expressed
LOC_Os02g51550	0.15121	0	7.06861	9.16013	10.7238	1.14987	1.66513	1.26052		DUF581 domain containing protein, expressed
LOC_Os01g03270	0.151635	0.00189739	1.21844	1.27225	0.941664	0.0649094	0.135354	0.320201		expressed protein
LOC_Os04g40490	0.151695	8.74294e-09	1.25972	1.05229	1.05702	0.113339	0.118171	0.279553		glycosyl hydrolase family 5 protein, putative, expressed
LOC_Os03g42760	0.151838	0	9.09614	9.23244	11.1998	1.2295	1.75891	1.49513		zinc finger protein-related, putative, expressed
LOC_Os09g37710	0.152001	0	5.83632	5.77252	4.2479	0.763756	0.877577	0.768906		NIN, putative, expressed
LOC_Os04g10750	0.152269	0	1.71942	1.83277	2.10401	0.326318	0.302428	0.232518	OsPT4, PHT1-4, OsPht1;4, PHT1-2	phosphate transporter gene
LOC_Os04g44210	0.152388	0	12.583	13.6732	11.2517	1.01458	2.27323	2.42794		expressed protein
LOC_Os04g51000	0.152669	1.04462e-06	0.971588	1.13156	1.13665	0.075648	0.157747	0.261222	RFL, OSL, FL, APO2, APO2/RFL, SSC, SSC/RFL/APO2	rice LFY homolog; ABERRANT PANICLE ORGANIZATION 2
LOC_Os01g40860	0.153917	0	6.222	6.15812	6.12395	1.10435	1.21368	0.530057	ALDH1a, Aldh1a, OsALDH1a, OsALDH2C4, ALDH2C4	Rice Aldehyde Dehydrogenase
LOC_Os11g19060	0.155195	0	6.81461	7.88347	6.83906	0.868406	1.39695	1.07709	OsPLT6, AP2/EREBP#118, AP2/EREBP118	BABY BOOM 1, putative, expressed
LOC_Os06g18010	0.155396	0	12.314	13.3248	17.3533	1.56671	3.12182	1.99227	OsCGT, CGT	UDP-glucoronosyl and UDP-glucosyl transferase domain containing protein, expressed
LOC_Os10g25140	0.155489	0	22.2846	21.366	16.8008	2.97728	2.46313	3.95911	OsAlaAT4, AlaAT4	aminotransferase, classes I and II, domain containing protein, expressed
LOC_Os07g40250	0.155778	0	7.45688	8.74542	11.1368	1.23061	1.62523	1.40299		sex determination protein tasselseed-2, putative, expressed
LOC_Os06g09600	0.157379	1.61055e-06	1.80733	3.11792	3.79129	0.159074	0.663424	0.549302		expressed protein
LOC_Os04g31820	0.15777	0.000296207	4.78213	4.99335	9.19564	1.07564	1.1215	0.795928		expressed protein
LOC_Os08g24880	0.158107	0.000202154	0.629346	0.722858	0.660098	0.159253	0.0332086	0.125696		EDM2, putative, expressed
LOC_Os11g05840	0.158118	4.41809e-06	0.200246	0.281468	0.161562	0.0311823	0.0243839	0.0461471		retrotransposon protein, putative, Ty1-copia subclass, expressed
LOC_Os07g10550	0.158471	3.24237e-05	0.304713	0.515136	0.304383	0.0734346	0.0612524	0.0434707		cyclin-related protein, putative, expressed
LOC_Os08g05480	0.158639	4.54088e-11	1.87121	3.03362	3.71869	0.299053	0.675574	0.393398	OsFbox407, Os_F0406	OsFBX261 - F-box domain containing protein, expressed
LOC_Os05g50940	0.158739	0	36.7227	42.8476	43.959	4.84234	6.82654	7.94005		expressed protein
LOC_Os11g26790	0.159141	0	2484.6	2703.18	2368.44	281.28	527.617	393.605	Rab16A, rab21, RAB21, OsRab21, OsRAB21, OsRab16A, OsLEA29, rab16A, OsRAB16A	Responsive to ABA
LOC_Os10g21130	0.16032	0	2.81263	2.59985	3.14351	0.373363	0.583923	0.414409		expressed protein
LOC_Os06g10580	0.160453	0	2.79417	2.89839	2.50652	0.33492	0.484999	0.495652	OsCNGC11, OsCNGC13, CNGC13, SSS1-D	cyclic nucleotide-gated ion channel, putative, expressed
LOC_Os02g45520	0.160696	0	3.71583	4.68985	4.18119	0.602505	0.951809	0.468344	OsSPX-MFS2, SPX-MFS2	OsSPX-MFS2
LOC_Os02g45620	0.161012	0	2.70833	3.39354	3.18155	0.493438	0.514476	0.486829	OsOFP6, OsOFP09	DUF623 domain containing protein, expressed
LOC_Os08g22380	0.161602	0	1.54174	1.60983	1.23302	0.195065	0.244058	0.269433		retrotransposon protein, putative, unclassified, expressed
LOC_Os03g52860	0.162138	0	27.6776	21.1155	19.937	0.902464	6.20621	4.03512	OsLOX-L2, LOX1.1, LOX L-2, LOX-2	lipoxygenase gene
LOC_Os09g30010	0.162401	0	17.0889	21.6135	25.4974	3.06962	3.6069	3.74958	OsFLA10	fasciclin domain containing protein, expressed
LOC_Os03g16940	0.16278	0	702.14	770.249	1060.52	129.3	153.965	129.041	OsGLYI3	glyoxalase family protein, putative, expressed
LOC_Os04g31710	0.162857	0	211.807	218.159	236.534	25.4703	39.7079	43.3657		expressed protein
LOC_Os12g06270	0.163188	0	1.81961	1.76208	1.40061	0.193089	0.356185	0.263774	OsEXO70A4, OsExo70A4, OrysaA4_Exo70	retrotransposon protein, putative, unclassified, expressed
LOC_Os06g27910	0.163331	0	41.1875	46.3095	50.0471	6.74385	6.78279	8.93858		oleosin, putative, expressed
LOC_Os02g53620	0.163392	0	5.15073	6.88615	5.70535	1.2181	0.863625	0.817216	OsHAP2K, NF-YA11, OsNF-YA11, NFYA11	nuclear transcription factor Y subunit, putative, expressed
LOC_Os07g49140	0.163483	0	2.64092	3.01323	2.21964	0.247836	0.166116	0.873275	OsSCAR4, SCAR4	expressed protein
LOC_Os02g48820	0.165675	2.2682e-07	1.66853	1.63334	1.85944	0.316661	0.330162	0.20828	OsENODL8	plastocyanin-like domain containing protein, putative, expressed
LOC_Os08g30900	0.166445	0	7.24324	6.61939	4.50636	0.914868	1.21521	0.927346		YDG/SRA domain containing protein, expressed
LOC_Os03g46110	0.166953	3.63409e-05	1.14935	1.0001	1.3562	0.242366	0.15162	0.191296		LTPL94 - Protease inhibitor/seed storage/LTP family protein precursor, expressed
LOC_Os09g02180	0.167309	0	111.338	136.186	148.861	17.833	29.1812	19.3047		expressed protein
LOC_Os04g33900	0.168493	0	18.2274	23.5009	33.4149	3.52945	3.51266	5.61898	COPT4, OsCOPT4	copper transporter gene
LOC_Os03g42420	0.16851	0	2.57013	3.50939	3.06897	0.56031	0.625927	0.355375		B3 DNA binding domain containing protein, expressed
LOC_Os02g04380	0.170422	3.49885e-07	0.719091	0.750852	0.910276	0.0752949	0.15701	0.173335		expressed protein
LOC_Os12g24084	0.171833	0	7.76048	6.3512	10.1196	1.48608	1.10675	1.57091	OsEnS-149	expressed protein
LOC_Os03g22360	0.171926	0	15.0717	16.9338	19.8757	2.31951	3.25555	3.34466		expressed protein
LOC_Os04g55970	0.173983	0	43.4019	46.8127	37.163	5.19721	7.11723	9.84705	OsPLT1, AP2/EREBP#044, AP2/EREBP44	AP2-like ethylene-responsive transcription factor AINTEGUMENTA, putative, expressed
LOC_Os12g04360	0.174429	0	6.35423	7.94729	9.88722	1.34287	1.6212	1.25515		calmodulin-like protein 1, putative, expressed
LOC_Os11g32650	0.174744	0	16.7838	18.7193	22.1103	3.28503	3.29461	3.48797	CHS*, Oschs, chs, chas, OsCHS, OsCHS1, CHS1, OsPKS26, PKS26	chalcone synthase, putative, expressed
LOC_Os06g40870	0.175109	0	5.4741	6.58192	7.53945	0.727577	0.992013	1.71176		expressed protein
LOC_Os10g06740	0.175442	0	5.81162	5.7403	3.57498	0.588242	1.07746	0.988187		receptor-like protein kinase precursor, putative, expressed
LOC_Os12g32200	0.175903	0	128.817	134.506	128.894	16.661	28.6236	23.7078		expressed protein
LOC_Os02g11040	0.176009	0	181.46	186.104	224.606	20.346	41.5365	42.3448		expressed protein
LOC_Os08g43500	0.176019	5.64197e-06	0.59306	0.802737	0.506846	0.0666983	0.0927227	0.17548		armadillo/beta-catenin repeat family protein, putative, expressed
LOC_Os09g33876	0.176134	0	9.32262	9.20753	7.132	1.53216	1.57213	1.41567		expressed protein
LOC_Os08g36110	0.176669	0	3.0497	3.46538	2.54016	0.317764	0.520633	0.761378		ZOS8-06 - C2H2 zinc finger protein, expressed
LOC_Os07g41720	0.177934	0	28.8946	35.4228	31.3915	6.13817	5.79754	5.09414	OsHAP2G, NF-YA, CBF-B, NF-YA6, OsNF-YA6, NFYA6	HAP2 subunit of the CCAAT-box-binding transcription factor
LOC_Os06g01780	0.178243	0.0341725	0.674098	0.372638	1.20612	0.0802718	0.0836943	0.23759	OsSTA163	ethylene-responsive element-binding protein, putative, expressed
LOC_Os03g48310	0.178817	0	49.8552	48.4327	40.841	9.99746	7.36208	7.51909	OSA1, OsA1, osAHA1, AHA1	plasma membrane ATPase, putative, expressed
LOC_Os03g30580	0.178982	0	5.27667	4.94823	3.87768	0.544301	1.24142	0.738391		expressed protein
LOC_Os05g49280	0.180147	2.9376e-09	3.10643	2.20568	3.1279	0.503084	0.458967	0.55839	OsGATA8, GATA8	GATA zinc finger domain containing protein, expressed
LOC_Os09g36650	0.18113	0.000786522	0.769947	0.587505	0.465905	0.119896	0.0625042	0.147863		expressed protein
LOC_Os01g44970	0.181398	0	16.5735	19.6326	15.8519	2.48909	2.78445	4.16967		polygalacturonase, putative, expressed
LOC_Os12g02750	0.181906	0	8.53868	9.5506	8.55014	1.34255	1.51645	1.98686		expressed protein
LOC_Os09g33680	0.182087	0	86.721	93.719	75.7668	20.9401	13.48	12.2318	Os9bglu31, Os9BGlu31	Os9bglu31 - beta-glucosidase, dhurrinase, similar to G. max hydroxyisourate hydrolase, expressed
LOC_Os04g43710	0.182245	0	15.0505	19.4186	23.1305	2.34721	3.7909	4.35911		CAMK_CAMK_like.3 - CAMK includes calcium/calmodulin depedent protein kinases, expressed
LOC_Os06g44190	0.182682	0	31.4545	39.3167	47.1995	7.90132	6.5421	7.10767		expressed protein
LOC_Os03g42130	0.182775	0	58.2529	65.6234	74.6531	13.5365	13.2045	9.54528		gibberellin 20 oxidase 2, putative, expressed
LOC_Os03g52300	0.183168	0	4.98026	7.24083	8.06685	0.82952	0.997948	1.88864		SCP-like extracellular protein, expressed
LOC_Os01g61330	0.183192	0	24.9388	25.4451	28.7731	4.57972	5.86533	4.05588		ankyrin homolog precursor, putative, expressed
LOC_Os08g29600	0.183307	0	38.4631	48.4245	52.7395	6.99553	9.19653	9.40252		seed maturation protein PM41, putative, expressed
LOC_Os01g38140	0.183432	3.00397e-10	0.729032	0.732506	0.605953	0.0417686	0.145165	0.19231		retrotransposon protein, putative, unclassified, expressed
LOC_Os05g34150	0.183517	0	76.5694	79.0492	95.7602	13.9096	16.2395	15.9831	OsGSTU16	glutathione S-transferase, putative, expressed
LOC_Os06g07240	0.183677	3.6892e-06	1.11956	1.31514	1.71247	0.236084	0.246149	0.279506		X8 domain containing protein, expressed
LOC_Os09g29360	0.183819	0	13.509	16.1777	15.2098	2.0858	3.42319	2.74383	OsbHLH046	helix-loop-helix DNA-binding protein, putative, expressed
LOC_Os06g50960	0.184218	0	18.2993	20.2841	24.8171	3.18535	5.00225	3.49188		expansin precursor, putative, expressed
LOC_Os01g53980	0.184354	0	6.91874	8.19783	8.28615	1.043	1.60532	1.66606		IQ calmodulin-binding motif family protein, expressed
LOC_Os04g03860	0.184508	0	3.73723	3.41451	2.25741	0.827479	0.475398	0.43319	OsMED15_1, MED15_1, OsKIX_3, KIX_3	expressed protein
LOC_Os05g47870	0.184897	0	18.9659	19.4628	14.1302	3.11996	3.50174	3.09628		expressed protein
LOC_Os02g20970	0.184926	0	32.2368	32.3205	25.0489	4.73777	5.07256	6.76018	OsNTMC2T6.2	C2 domain containing protein, putative, expressed
LOC_Os11g13930	0.185169	0	4.7003	5.77701	5.77731	0.817705	1.21426	0.977884	OsZHD4	zinc-finger transcription factor
LOC_Os01g74000	0.185301	0	18.1904	21.0874	20.6641	3.1765	3.40394	4.52684	OsSTA45	glycerol-3-phosphate dehydrogenase, putative, expressed
LOC_Os10g26290	0.18602	1.55088e-09	1.50568	2.25205	2.04876	0.205949	0.386514	0.487658		transferase family protein, putative, expressed
LOC_Os02g30610	0.186198	0	11.4664	11.5707	12.6998	1.60233	2.57369	2.47812		expressed protein
LOC_Os12g02100	0.186362	0	9.66447	8.86137	7.24452	1.59875	1.41264	1.79122		expressed protein
LOC_Os03g39230	0.186395	0	15.3106	15.8509	12.9758	2.22194	2.84676	3.15823		OTU-like cysteine protease family protein, putative, expressed
LOC_Os03g15190	0.186808	0	22.2405	21.0084	23.0991	3.30241	4.47617	4.61576		expressed protein
LOC_Os04g49270	0.187412	0	2.14759	2.81498	2.01289	0.2775	0.482219	0.547567		tRNA-splicing endonuclease positive effector-related, putative, expressed
LOC_Os06g43960	0.18762	0	34.8074	34.1499	33.1077	6.95973	7.03088	5.15879		expressed protein
LOC_Os08g28670	0.187694	0	44.4273	46.5489	57.1178	8.64631	9.81986	9.33025		pathogenesis-related Bet v I family protein, putative, expressed
LOC_Os09g39740	0.189429	0	4.28254	4.4098	4.39854	0.749949	0.797563	0.932282		ACT domain containing protein, expressed
LOC_Os08g41750	0.192727	0	3.2995	3.86284	4.50943	0.556616	0.844142	0.848704	OsFbox463, Os_F0230	OsFBX303 - F-box domain containing protein, expressed
LOC_Os04g34530	0.192748	0	11.8223	13.4785	13.1486	3.36063	2.71799	1.33245		integral membrane protein DUF6 containing protein, expressed
LOC_Os09g34290	0.192951	0	5.18222	4.66277	3.58508	0.892825	0.872711	0.825814		transposon protein, putative, CACTA, En/Spm sub-class, expressed
LOC_Os05g38980	0.193252	0	17.6174	18.5274	14.0147	2.26323	3.55862	3.87159	rbohD, OsrbohD, Os rbohD, OsRbohD, OsNox4	Rice respiratory burst oxidase homolog
LOC_Os10g35490	0.193719	0	2.40151	2.68929	2.08079	0.45797	0.514226	0.41708		hydrolase, alpha/beta fold family domain containing protein, expressed
LOC_Os01g56420	0.194204	0	15.1211	16.1973	20.1667	3.23258	3.57676	3.18929	COPT1, OsCOPT1	copper transporter gene
LOC_Os05g32460	0.194851	0.0143118	1.01007	0.930604	0.872469	0.300699	0.188112	0.0593343	OsVQ19	VQ domain containing protein, putative, expressed
LOC_Os02g06170	0.195129	0	31.9212	32.053	33.6292	5.81391	5.61461	7.61672		expressed protein
LOC_Os04g46740	0.195594	0	37.4095	47.5013	39.7673	5.31193	6.57501	12.4994	OsPME15	pectinesterase, putative, expressed
LOC_Os08g02204	0.195717	1.43581e-05	1.35776	2.19104	1.6183	0.312341	0.390789	0.308158		expressed protein
LOC_Os01g43140	0.195806	0	6.41892	9.14656	9.08644	1.51437	1.55347	1.75917		lipase, putative, expressed
LOC_Os02g30810	0.196154	3.49298e-12	2.38393	2.56952	2.6214	0.856214	0.284047	0.345578	OsSAUR10	OsSAUR10 - Auxin-responsive SAUR gene family member, expressed
LOC_Os03g19550	0.196281	5.66873e-07	1.47078	1.99646	1.85118	0.347362	0.206956	0.489586		retrotransposon protein, putative, unclassified, expressed
LOC_Os01g09870	0.196433	4.5081e-06	2.79495	3.81637	5.7503	0.870462	1.02102	0.536753		expressed protein
LOC_Os03g50364	0.197327	0	2.88928	3.14437	3.45728	0.535467	0.687135	0.650211		expressed protein
LOC_Os06g04480	0.197336	0	4.09638	4.45804	4.84118	1.34316	0.608882	0.691395		expressed protein
LOC_Os11g26760	0.197603	0	146.812	153.883	152.956	17.0479	35.0311	37.5638	rab21, OsLEA27, rab16C	dehydrin, putative, expressed
LOC_Os10g41760	0.198279	0	4.46995	4.84024	3.61756	0.781995	0.844455	0.936848	OsCAO2, OsCAO, CAO	chlorophyll a oxygenase
LOC_Os04g01250	0.198693	0.0134736	0.374283	0.41524	0.392572	0.0947106	0	0.140163	FAAH	amidase family protein, putative, expressed
LOC_Os12g05180	0.200005	0	3.39675	3.04432	3.50334	0.716276	0.537707	0.734951		avr9/Cf-9 rapidly elicited protein, putative, expressed
LOC_Os02g48060	0.201325	0	3.5943	3.54455	4.18881	0.646771	0.716494	0.917282	OsbHLH126, bHLH126, OsRSL2, RSL2	helix-loop-helix DNA-binding domain containing protein, expressed
LOC_Os06g29844	0.201978	0.000413865	0.955744	0.592538	0.689181	0.211616	0.0315198	0.208782		MATE efflux family protein, putative, expressed
LOC_Os09g34950	0.202814	6.80773e-05	1.11973	1.72836	1.32763	0.492768	0.256889	0.0972337	OsTCP25, TCP25	TCP family transcription factor
LOC_Os02g30600	0.203061	0	22.0509	23.0249	29.5375	6.18494	3.92526	5.04087		expressed protein
LOC_Os01g57920	0.203845	0.000609517	0.551108	0.846249	1.05407	0.229691	0.205272	0.0647472	OsFbox044, OsFbox44, Os_F0491	OsFBL3 - F-box domain and LRR containing protein, expressed
LOC_Os01g56030	0.203958	0	3.05776	3.50686	4.46901	0.811805	0.687714	0.750875		EF hand family protein, putative, expressed
LOC_Os03g19920	0.204779	0	2.15319	1.92354	2.03256	0.508531	0.479717	0.262806		expressed protein
LOC_Os11g44750	0.205029	3.49298e-11	0.770139	0.650317	0.330132	0.0677844	0.190821	0.100315		retrotransposon protein, putative, unclassified, expressed
LOC_Os02g35660	0.205128	0	1.58943	2.1097	2.23221	0.409014	0.511743	0.295927	OsbHLH097	PTF1, putative, expressed
LOC_Os04g33760	0.20516	0	7.92935	8.40761	9.86013	1.40661	1.68225	2.28574	OsS40-6	DUF584 domain containing protein, putative, expressed
LOC_Os03g02710	0.205328	0	78.1727	78.777	85.6537	15.439	21.5146	12.8595		hydroxymethylglutaryl-CoA synthase, putative, expressed
LOC_Os11g14060	0.205332	1.15233e-05	0.967483	1.01022	0.864423	0.217615	0.151262	0.214701		expressed protein
LOC_Os02g52640	0.205678	5.93807e-11	1.36657	1.86121	1.49566	0.270629	0.344871	0.356006	OsSTA79	xyloglucan fucosyltransferase, putative, expressed
LOC_Os01g47080	0.206556	0	56.8348	56.4402	58.5177	10.7361	13.2386	11.5101		pyruvate kinase, putative, expressed
LOC_Os04g18884	0.206762	7.33527e-11	1.80979	2.08522	1.83277	0.0947503	0.559811	0.529728		retrotransposon protein, putative, Ty3-gypsy subclass
LOC_Os06g02410	0.207823	0	9.70706	8.53013	10.6854	1.36192	1.67356	2.9753		expressed protein
LOC_Os01g62500	0.20795	0	7.02446	7.53568	6.60065	1.30513	1.8076	1.28765	OsFtsH3, FtsH3	OsFtsH3 FtsH protease, homologue of AtFtsH3/10, expressed
LOC_Os01g56610	0.208479	0	6.24214	7.32752	7.68579	0.784867	2.29133	1.35512		homocysteine S-methyltransferase protein, putative, expressed
LOC_Os02g41610	0.209877	0	10.8555	12.4398	6.8698	2.27141	2.31049	1.74906		expressed protein
LOC_Os02g50050	0.209914	4.78294e-08	2.91833	4.30197	4.05123	0.955666	0.724664	0.685722		expressed protein
LOC_Os04g46760	0.209978	0.00391774	0.797022	1.2206	1.11462	0.215128	0.336451	0.106124	OsTPP5	trehalose phosphatase, putative, expressed
LOC_Os04g52230	0.210189	0	8.86943	9.59976	6.54198	1.94995	1.99282	1.3143	OsKS1, KS1, KS1A, KSL1, OsKSL1, OsKS1A, OsKS1B, OsKS1C, Ks1, Os KS1, OsTPS26	ent-kaurene synthase gene
LOC_Os05g01100	0.210258	0	16.712	17.6493	15.3959	2.44408	3.95656	4.06122		expressed protein
LOC_Os04g50090	0.210613	0.0224303	0.614783	1.0164	0.859764	0.103712	0.216268	0.204646	OsbHLH050	helix-loop-helix DNA-binding protein, putative, expressed
LOC_Os06g36800	0.210741	0	55.1171	56.6783	46.7463	9.36635	11.2747	12.7702		O-acyltransferase, putative, expressed
LOC_Os09g35540	0.211121	0	5.66663	6.35373	6.10307	1.3473	1.60542	0.873513		expressed protein
LOC_Os11g37260	0.212017	0	32.4889	33.9239	23.9363	5.45804	6.52404	7.17351		SEY1, putative, expressed
LOC_Os12g29400	0.212395	0	13.0616	17.4702	15.9831	3.02187	3.93839	2.91929	OsABA45, ABA45, OsGDP, GDP	GRAM domain containing protein, expressed
LOC_Os12g18450	0.212921	0	2.01563	3.13	2.22253	0.392343	0.763599	0.412894		expressed protein
LOC_Os07g46840	0.213038	7.53886e-06	1.39	1.80173	2.36283	0.145544	0.606999	0.430786	OsSDR110C-MI2, SDR110C-MI2	oxidoreductase, short chain dehydrogenase/reductase family domain containing protein, expressed
LOC_Os11g34080	0.213362	0	28.4364	30.3698	32.8879	5.58146	5.02068	8.9619		expressed protein
LOC_Os04g43210	0.213369	5.95967e-05	0.5448	0.653139	0.571421	0.0816943	0.255532	0.0403001		transporter family protein, putative, expressed
LOC_Os10g35480	0.213562	0	41.2781	44.1915	47.4567	8.52528	9.36626	10.4965		lanC-like protein 2, putative, expressed
LOC_Os06g43980	0.213621	0	5.44457	4.79077	8.46967	1.2384	1.2912	1.46618		expressed protein
LOC_Os04g11524	0.213642	0	91.8089	104.579	121.345	16.246	23.1044	28.5307		retrotransposon protein, putative, unclassified, expressed
LOC_Os01g46760	0.214216	0	33.6828	38.1263	39.2373	6.09323	8.31943	9.37528	OsPP2C08, PP2C08, OsPP2C8, PP2C8, OsPP12	protein phosphatase 2C, putative, expressed
LOC_Os04g46880	0.214281	0	33.9622	33.9613	36.8738	6.97875	7.76482	7.7125	FCO11	transporter, major facilitator family, putative, expressed
LOC_Os04g47300	0.214785	0	6.86573	5.79753	5.38526	1.20859	1.38613	1.28183	OsCDPK12, OsCPK12, CPK12	Calcium-dependent protein kinase
LOC_Os02g19990	0.215286	0	56.5148	57.6085	56.0975	10.8759	12.3573	13.4129		reticulon domain containing protein, putative, expressed
LOC_Os02g10780	0.215301	0	5.55761	5.7581	8.04336	1.65707	1.09119	1.41976	OsSPX2, SPX2	SPX family protein
LOC_Os01g54210	0.215411	0	29.1225	29.5105	35.8258	6.06316	7.06143	7.22289	OsGATA6	GATA zinc finger domain containing protein, expressed
LOC_Os09g39020	0.215464	0	13.1392	12.8595	9.8829	2.17588	2.94713	2.60819		N-rich protein, putative, expressed
LOC_Os12g43870	0.216189	2.08711e-06	5.28911	8.55131	6.26336	0.690779	1.44046	2.21497		expressed protein
LOC_Os12g38440	0.217049	0	56.389	57.5627	61.2678	10.9516	13.5901	13.4896		XH domain containing protein, expressed
LOC_Os05g23398	0.217175	9.43106e-11	3.55794	3.95222	5.31979	0.9961	0.95868	0.831566		expressed protein
LOC_Os08g12750	0.21732	0	124.335	125.946	117.035	24.0821	27.8455	27.8975	OsDPK1, DPK1, MKKK32, OsMKKK32, MAPKKK32	rice dual-specificity protein kinase
LOC_Os05g45200	0.218708	6.15701e-05	1.17688	0.844843	1.27296	0.297805	0.349315	0.0734541		anthocyanidin 5,3-O-glucosyltransferase, putative, expressed
LOC_Os12g32610	0.21891	0	3.7117	3.9362	4.80551	0.704422	0.979275	1.04248		expressed protein
LOC_Os02g07460	0.219098	0	18.0324	20.9771	25.2604	3.91991	2.42668	7.73483		expressed protein
LOC_Os02g55130	0.219131	0	12.1105	10.3099	11.7639	1.94059	3.52397	2.02629	OsSCP10, SCP10	OsSCP10 - Putative Serine Carboxypeptidase homologue, expressed
LOC_Os01g46950	0.219153	0	39.2509	38.7145	39.7206	7.04775	7.56527	11.1782		aldose 1-epimerase, putative, expressed
LOC_Os03g09070	0.219872	0	13.4903	16.3749	13.0118	3.84251	3.14784	2.4371		leucine rich repeat domain containing protein, putative, expressed
LOC_Os12g37970	0.220132	0	7.16269	5.82154	5.92893	1.4108	0.858055	1.89454	R2R3-MYB	MYB family transcription factor, putative, expressed
LOC_Os08g24850	0.220475	8.45943e-06	4.03156	6.51813	4.36496	1.44798	0.411741	1.42859		retrotransposon, putative, centromere-specific, expressed
LOC_Os01g73440	0.223568	0.000143924	1.89767	1.74371	2.30886	0.537821	0.640859	0.151605		expressed protein
LOC_Os10g42800	0.223905	6.08827e-09	1.7116	1.54661	1.24285	0.36648	0.312631	0.328702	OsACS2	AMP-binding enzyme, putative, expressed
LOC_Os02g47210	0.224105	0	42.3018	61.6044	64.2574	13.1388	10.7712	13.7762	OsPUT1, PUT, OsLAT1	polyamine uptake transporter
LOC_Os10g13830	0.224311	0	2.1341	1.62352	2.0785	0.462879	0.45044	0.395789	OsPDR13	pleiotropic drug resistance protein 13, putative, expressed
LOC_Os01g62970	0.224476	1.28271e-06	1.66438	1.26722	1.01833	0.24568	0.329341	0.311643		expressed protein
LOC_Os08g36900	0.224907	5.23948e-11	170.854	274.093	242.893	15.5878	68.7133	70.399	Amy3D/E*(RAmy3D/E), alpha Amy8, alphaAmy8, AmyII-3, AMY1.4, Amy3E, Amy3D/E*, RAmy3D/E, Amy9, RAmy3E, alphaAmy8-C, AMY3E/AMY1.4	alpha-amylase precursor, putative, expressed
LOC_Os04g38810	0.225227	0	3.1725	3.67132	3.64544	0.899939	0.554456	0.908067	dw2(fh2), dw2, fh2, FH2, OsFH2	formin, putative, expressed
LOC_Os02g01190	0.226041	0.000335041	0.841446	1.03141	0.767445	0.296242	0.154436	0.146138		POEI25 - Pollen Ole e I allergen and extensin family protein precursor, expressed
LOC_Os01g44250	0.226636	0	28.0654	29.5263	30.5039	4.33404	8.05335	7.57825	OsCBSX10	CBS domain containing membrane protein, putative, expressed
LOC_Os12g03530	0.226952	0	5.05262	6.16434	4.65799	1.23817	1.01031	1.35437		alpha-N-arabinofuranosidase, putative, expressed
LOC_Os02g05550	0.226958	0.00865887	0.347147	0.310698	0.24274	0.0501966	0.104674	0.0495244		retrotransposon protein, putative, Ty1-copia subclass, expressed
LOC_Os04g33820	0.228939	0	9.23417	10.2699	11.3972	2.69531	1.67707	2.70211	OsFbox208, Os_F0775	OsFBX132 - F-box domain containing protein, expressed
LOC_Os01g59110	0.229521	0	3.74254	2.82233	2.65329	0.59628	0.585132	0.93435	OsUGT87C1	indole-3-acetate beta-glucosyltransferase, putative, expressed
LOC_Os06g42210	0.230098	0.0088056	0.878607	1.91128	1.76628	0.296437	0.386345	0.365583		expressed protein
LOC_Os06g43910	0.230232	1.48685e-05	0.802756	0.782332	0.898114	0.108338	0.169436	0.29394	OsRR25, Rrb3, Orr5, OsRR21, OsRRB3	two-component response regulator, putative, expressed
LOC_Os08g01700	0.230844	0	10.0809	8.81567	9.51615	1.81754	2.75943	1.98195	OsbHLH124	basic helix-loop-helix family protein, putative, expressed
LOC_Os12g41160	0.23086	0.00182938	0.637163	0.997958	1.16952	0.161231	0.168105	0.318144		IQ calmodulin-binding motif family protein, putative, expressed
LOC_Os01g12470	0.231808	0	19.6121	18.2488	19.8653	4.40243	3.96421	5.01474		mitochondrial carrier protein, putative, expressed
LOC_Os12g29480	0.233581	7.30767e-08	2.75589	2.42999	2.56938	0.495905	0.58168	0.733896		SAM domain containing protein, putative, expressed
LOC_Os11g10750	0.233737	0	18.7713	23.8416	21.849	3.93507	5.51129	5.62075	OsSCP48	OsSCP48 - Putative Serine Carboxypeptidase homologue, expressed
LOC_Os07g48760	0.233797	0	5.11573	6.41002	5.17632	1.24882	1.33383	1.32225	OsCIPK03, CIPK3, OsCIPK3	calcineurin B-like–interacting protein kinase gene
LOC_Os06g15380	0.235153	0	18.282	29.1279	28.9282	7.49759	4.15812	6.29547		acylphosphatase, putative, expressed
LOC_Os03g41060	0.235518	0	108.48	133.845	178.43	25.3499	33.743	40.0023		GASR2 - Gibberellin-regulated GASA/GAST/Snakin family protein precursor, putative, expressed
LOC_Os06g50930	0.236576	0	90.801	87.3636	94.8739	20.9962	23.1528	20.4455	OsStr9	rhodanese-like domain containing protein, putative, expressed
LOC_Os09g27750	0.236657	0	105.091	143.267	139.585	24.6602	34.6584	32.4908	OsACO2	aminocyclopropane-1-carboxylate oxidase gene
LOC_Os02g40410	0.237047	0	10.1735	9.3195	7.22729	1.45375	2.16533	2.71489		expressed protein
LOC_Os06g07030	0.237341	0	30.5942	34.9916	31.5154	6.12694	7.19631	9.7228	OsERF#007, OsERF007, OsERF7, AP2/EREBP#142, AP2/EREBP142	AP2 domain containing protein, expressed
LOC_Os01g03360	0.237496	0	11680.6	11459.3	13137.5	1868.46	3712.88	3034.42	RBBI3-3, OsBBPI	BBTI5 - Bowman-Birk type bran trypsin inhibitor precursor, expressed
LOC_Os08g38740	0.237639	0	2.59288	2.80076	2.01624	0.588242	0.636911	0.53572	OsSTA216	glycosyl transferase 8 domain containing protein, putative, expressed
LOC_Os10g38710	0.237918	1.39719e-11	3.98511	4.16113	5.14907	0.701506	0.731415	1.73028	OsGSTU13	glutathione S-transferase, putative, expressed
LOC_Os03g15320	0.237939	0	2.48488	2.90352	2.63733	0.868327	0.686817	0.354496		glyoxal oxidase-related, putative, expressed
LOC_Os02g36490	0.238009	0	22.8842	22.1296	21.0892	5.04207	4.26936	6.42169		expressed protein
LOC_Os03g28270	0.238729	3.49298e-12	0.893773	0.880672	1.08268	0.114675	0.265699	0.301705		Leucine Rich Repeat family protein, expressed
LOC_Os01g50910	0.238783	0	1623.45	1556.72	1621.19	222.494	427.4	496.592	OsLEA14, OsLEA14a, OsLEA14b, wsi18, pwsi18	late embryogenesis abundant protein, group 3, putative, expressed
LOC_Os12g02760	0.239029	1.0479e-11	3.53965	3.63732	5.00907	0.739301	0.770822	1.40269		DUF567 domain containing protein, putative, expressed
LOC_Os02g46970	0.23906	0	2.75603	3.72857	3.69506	0.533662	1.06225	0.837638	Os4CL2	4-Coumarate:Coenzyme A Ligase
LOC_Os07g31250	0.240886	0	1.74415	2.17654	1.13778	0.365997	0.448943	0.403577	OsRLCK231	OsWAK69 - OsWAK receptor-like cytoplasmic kinase OsWAK-RLCK, expressed
LOC_Os12g05200	0.241781	8.38802e-06	1.86327	1.7788	1.7868	0.484963	0.561822	0.265815		DNA binding protein, putative, expressed
LOC_Os07g46470	0.241882	2.67786e-07	1.57231	2.96575	3.19188	0.667387	0.695842	0.506499		expressed protein
LOC_Os04g18950	0.24196	2.63444e-07	4.65876	5.57642	4.76723	0.690076	1.91866	1.02125		expressed protein
LOC_Os03g08110	0.242718	0	12.1358	12.5853	15.1616	3.10235	3.10349	3.47443		hydrolase protein, putative, expressed
LOC_Os03g58300	0.243071	0	22.6477	20.0649	22.484	4.69912	4.89948	6.24878	OsIGL, OsIgl	indole-3-glycerol phosphate lyase, chloroplast precursor, putative, expressed
LOC_Os07g41080	0.243563	0	63.9892	69.5579	67.1715	13.5606	18.9544	16.3727		hydrolase, alpha/beta fold family domain containing protein, expressed
LOC_Os08g24930	0.243634	0	34.0576	36.8541	33.6666	6.65442	8.21693	10.6075		expressed protein
LOC_Os04g44090	0.244544	2.66619e-08	0.828487	1.39257	0.911359	0.163625	0.319878	0.28251	OsSTA127	expressed protein
LOC_Os07g49510	0.245343	2.79439e-11	3.53234	3.23363	2.53763	0.979552	0.868119	0.434895		expressed protein
LOC_Os07g43250	0.245475	0.000381945	2.96764	1.23949	2.62846	0.400505	0.487178	0.790283	OSK22	SKP1-like protein 1B, putative, expressed
LOC_Os03g31180	0.245584	0	27.8193	29.2077	20.8373	5.44897	7.18232	6.49091		diacylglycerol kinase 1, putative, expressed
LOC_Os04g55620	0.245714	0	15.9404	17.8929	15.7734	3.75767	3.71867	4.71273		receptor kinase, putative, expressed
LOC_Os02g44900	0.246041	0	9.73108	9.38189	9.96842	1.47744	3.18357	2.49421		expressed protein
LOC_Os01g70950	0.246291	0	49.2451	50.3467	40.4496	10.7463	11.7802	11.9644		spermatogenesis-associated protein 20 precursor, putative, expressed
LOC_Os05g08970	0.2466	0	25.8639	24.9199	19.71	5.09036	5.97082	6.32258		SSRP1-like FACT complex subunit, putative, expressed
LOC_Os09g28660	0.247195	6.98597e-12	2.67012	3.6685	3.48846	0.663809	0.642675	1.12272		gibberellin receptor GID1L2, putative, expressed
LOC_Os10g21090	0.247422	0	2.30544	2.6136	2.60232	0.5556	0.625632	0.679718		ATP binding protein, putative, expressed
LOC_Os01g10130	0.247473	0	3.0687	3.51103	2.87624	0.462608	0.964663	0.912825	OsRDR3, OsRDR3a	RNA-dependent RNA polymerase, putative, expressed
LOC_Os02g45690	0.248026	0	29.685	27.3599	21.4372	5.25087	6.99551	7.2192		uncharacterized mscS family protein, putative, expressed
LOC_Os05g41620	0.248131	0	45.9502	50.6244	56.1649	10.9866	12.6769	14.2358		expressed protein
LOC_Os03g20910	0.248759	0	10.2129	10.4264	10.924	2.27727	3.20139	2.373	OsWOX6, Os WOX6, OsWOX12B	homeobox domain containing protein, expressed
LOC_Os04g31720	0.249378	6.99575e-08	3.45264	3.35934	4.36208	0.9531	0.57968	1.25378		expressed protein
LOC_Os06g11610	0.249429	0	13.7741	14.6547	17.5918	3.78234	3.5309	4.1656		heat shock 22 kDa protein, mitochondrial precursor, putative, expressed
LOC_Os07g31140	0.24967	0.000490565	1.1303	1.0386	1.18553	0.320339	0.381711	0.13545		3-oxo-5-alpha-steroid 4-dehydrogenase, putative, expressed
LOC_Os11g35060	0.250007	0	13.761	14.4908	11.4193	2.29385	3.37789	4.24628		agenet domain containing protein, expressed
LOC_Os01g45860	0.25039	0	31.1874	38.1544	35.013	6.83174	5.68438	13.6133	OsSLRL1, OsGAI, OsSLRL	GRAS-domain protein; SLR1 Like-1
LOC_Os12g07640	0.250806	6.98597e-12	2.46521	3.16117	2.67639	0.437761	0.867209	0.777418	R2R3-MYB	Rice MYB
LOC_Os12g06480	0.252302	0	8.52153	8.58794	6.74007	1.36096	1.95342	2.70291		PHD-finger family protein, expressed
LOC_Os06g29994	0.253663	0	10.018	11.4359	12.4333	2.1193	3.19551	3.28113		MATE efflux family protein, putative, expressed
LOC_Os06g49970	0.254307	9.72796e-09	1.40533	1.26196	1.41504	0.28449	0.444929	0.308748	Amy2A*(RAmy2A), AMY1.5, AMYC2, RAmy2A, Amy4, Amy2A	alpha-amylase precursor, putative, expressed
LOC_Os04g51930	0.254456	1.67699e-06	0.552185	0.489545	0.393396	0.147637	0.175922	0.0416171		retrotransposon protein, putative, LINE subclass, expressed
LOC_Os01g59780	0.254479	2.99432e-05	1.16592	1.53305	1.63052	0.305958	0.364575	0.43123	AP2/EREBP#079	AP2 domain containing protein, expressed
LOC_Os04g50700	0.254727	0	12.1651	12.0016	14.8714	2.97217	3.45305	3.51884		pathogenesis-related Bet v I family protein, putative, expressed
LOC_Os01g43440	0.255354	0.0136372	0.751401	0.941508	0.827523	0.114083	0.0792982	0.450222	OsTMM, TMM	TOO MANY MOUTHS precursor, putative, expressed
LOC_Os05g37410	0.255383	0	33.5257	35.0278	15.2743	6.35687	7.76472	7.28658	ROS1D, ROS1d	hhH-GPD superfamily base excision DNA repair protein, expressed
LOC_Os07g40220	0.255506	0.000810449	2.9364	2.92349	4.08263	0.414721	0.216202	1.90945		expressed protein
LOC_Os03g11550	0.255744	0	50.5382	58.2558	53.1472	10.2981	13.0881	18.0293	MODD	protein of unknown function DUF1675 domain containing protein, expressed
LOC_Os06g46720	0.256293	0	1.1386	1.32099	1.31366	0.332937	0.280376	0.353746		retrotransposon protein, putative, unclassified, expressed
LOC_Os01g19850	0.256854	6.33218e-06	0.746687	0.974585	0.783173	0.165328	0.221627	0.256321	Os CCC2, OsCCC2, OsLAT8	amino acid permease family protein, putative, expressed
LOC_Os05g31020	0.257825	0	180.982	188.156	156.999	38.7246	52.5271	44.3995		eukaryotic peptide chain release factor subunit 1-1, putative, expressed
LOC_Os02g49510	0.25801	0.00216838	0.469714	0.735691	0.656887	0.0792393	0.192775	0.208475	OsATL3	amino acid transporter, putative, expressed
LOC_Os06g14870	0.258443	0	5.37545	7.08995	7.24053	1.31728	1.91088	1.8647		expressed protein
LOC_Os03g59550	0.258561	0	6.77945	5.97644	7.69356	1.68739	1.93526	1.66479	OsY14b, Y14b	RNA recognition motif containing protein, putative, expressed
LOC_Os01g36550	0.258752	0.00188953	0.60753	0.916304	0.885023	0.23914	0.249336	0.134821	OsLysM-RLK3, OsLYK1	protein kinase family protein, putative, expressed
LOC_Os12g42190	0.258776	0.000263661	1.29748	0.821082	1.60831	0.318372	0.331946	0.314108	OsPCF8, PCF8	TCP family transcription factor
LOC_Os01g55350	0.258962	0	1.87918	2.45749	2.14323	0.387801	0.61613	0.674118	Osppc3, Osppc2, ppc3, ppc2	phosphoenolpyruvate carboxylase, putative, expressed
LOC_Os01g68870	0.259323	0	11.3881	11.1902	9.49839	2.80974	2.92954	2.57897	Msp1	MULTIPLE SPOROCYTE 1
LOC_Os06g10980	0.259396	6.56711e-06	1.19596	0.967808	1.12896	0.211843	0.283982	0.358295		xyloglucan fucosyltransferase, putative, expressed
LOC_Os03g45344	0.259551	0	12.2864	12.246	15.0541	2.48722	3.77202	4.01549		expressed protein
LOC_Os10g07450	0.259848	0	12.2044	12.676	13.0717	3.72553	2.58958	3.54667		expressed protein
LOC_Os07g47670	0.260339	0	198.458	204.822	208.224	45.1637	38.6978	75.3366	OsHIGD2, HIGD2	hypoxia-responsive family protein, putative, expressed
LOC_Os01g54990	0.260339	0	39.7033	41.7713	37.7158	9.08491	12.8878	9.0572	OsARF3, ETT3, Os ETT3, OsETT3	auxin response factor
LOC_Os04g59120	0.260954	0.00439032	0.724138	0.584276	1.00119	0.266531	0.138947	0.197221	OsUMAMIT7	auxin-induced protein 5NG4, putative, expressed
LOC_Os07g02330	0.262049	4.33013e-05	1.18462	1.43644	1.28258	0.193395	0.524264	0.305287	OsPP2C61, PP2C61, OsPP93	protein phosphatase 2C, putative, expressed
LOC_Os02g07840	0.262193	0	28.2954	28.6689	31.1871	6.75551	8.05578	8.30136	OsbZIP15	bZIP transcription factor
LOC_Os10g25810	0.262335	0.000541068	1.15545	1.781	2.19297	0.612607	0.348396	0.38462		expressed protein
LOC_Os01g39020	0.262551	0	17.9571	19.9013	17.3054	2.73538	5.17864	6.56932	OsHsfA7, OsHsf-01, HSFA6B, HSF01, OsEnS-9	heat shock transcription factor gene
LOC_Os07g45210	0.262569	0.00922323	0.91304	0.777747	0.277216	0.14592	0.202856	0.167961		expressed protein
LOC_Os09g23894	0.263337	0	82.4577	89.8761	92.5561	16.1067	19.7959	33.8527		expressed protein
LOC_Os03g57660	0.263431	0	30.2991	33.7157	27.5114	6.79027	8.0445	9.276	go, go1, pla3, PLA3, PLA3/GO, OsLBD3-7, LBD3-7	peptidase, putative, expressed
LOC_Os05g27090	0.263576	1.02096e-05	2.77695	3.07534	3.61874	0.511052	0.976875	1.00841	OsbHLH162	basic helix-loop-helix domain containing protein, expressed
LOC_Os03g55350	0.263634	0	111.223	117.896	124.524	29.6349	34.416	29.1813	OsSub31, SUB31	OsSub31 - Putative Subtilisin homologue, expressed
LOC_Os01g03690	0.26508	0	3.14652	3.67411	3.58417	0.821897	0.821234	1.11497	OsRLCK19	TKL_IRAK_DUF26-lg.1 - DUF26 kinases have homology to DUF26 containing loci, expressed
LOC_Os07g39460	0.265291	3.34412e-05	0.887237	0.690278	0.437925	0.123261	0.220314	0.191102		transposon protein, putative, unclassified, expressed
LOC_Os04g40540	0.265375	0	17.8237	20.0221	19.5237	4.41343	5.00525	5.80576	OsPIMT2, OsPIMT2'-1, OsPIMT2'-2, deltaOsPIMT2	protein-L-isoaspartate O-methyltransferase, putative, expressed
LOC_Os04g54620	0.266238	5.79486e-09	11.4272	10.7621	15.5107	2.9483	2.83754	4.25134		expressed protein
LOC_Os05g35240	0.266351	6.98597e-12	4.10329	6.97964	7.49693	1.1388	2.02549	1.78446		expressed protein
LOC_Os03g15330	0.266653	0.022541	2.69016	2.80898	1.59482	0.710329	0.246872	0.934422		expressed protein
LOC_Os05g34800	0.26706	0	2.68276	3.26813	3.90813	0.704004	0.812665	1.11628		expressed protein
LOC_Os08g42600	0.267131	0	30.1927	30.0404	24.9678	7.10782	7.85161	7.8004	Orysa;Rb2, RBR2, OsRBR1	retinoblastoma-related protein-like, putative, expressed
LOC_Os06g33330	0.267445	0	38.579	37.0746	36.167	10.4534	10.9291	8.52345	OsTBL49, TBL49, OsTBL50, TBL50	powdery mildew resistant protein 5, putative, expressed
LOC_Os09g34180	0.267698	0	21.9843	23.621	21.2957	5.14263	7.09483	5.67181	OsFH15, FH15	formin, putative, expressed
LOC_Os02g50060	0.268268	1.97354e-09	2.46912	3.07187	3.6918	0.744441	0.997948	0.734472	OsCML20	calmodulin
LOC_Os06g41030	0.268393	0	1.90282	3.18285	1.53076	0.448778	0.662875	0.664151		DUF1680 domain containing protein, putative, expressed
LOC_Os03g15960	0.268527	0	112.931	137	126.76	34.6466	38.5131	27.992	Oshsp17.9A, OsHsp17.9A, OsHSP17.9A-CI, Oshsp17.9	hsp20/alpha crystallin family protein, putative, expressed
LOC_Os03g15180	0.270214	0	2.33127	2.4619	1.8061	0.643546	0.531196	0.608473		PH domain containing protein, expressed
LOC_Os01g47262	0.270316	0	161.204	164.116	153.537	36.2028	43.7715	49.4685		AMSH-like protease, putative, expressed
LOC_Os04g28860	0.270901	1.40389e-06	0.851484	1.29323	0.771305	0.117526	0.285919	0.386507		expressed protein
LOC_Os05g02564	0.271073	0	8.31195	9.36029	7.62834	1.80982	2.34598	2.7025		expressed protein
LOC_Os02g47770	0.271328	0	11.5125	13.4324	12.2706	3.16088	3.4924	3.44436	OsZHD7	ZF-HD protein dimerisation region containing protein, expressed
LOC_Os01g11880	0.271852	0	30.8689	33.2312	33.1094	8.05984	8.84002	9.52679	OsDJ-1B, DJ-1B	DJ-1 family protein, putative, expressed
LOC_Os01g50820	0.272952	0.000211256	1.02829	0.660746	0.691372	0.213502	0.278256	0.157982	OsNRT2.3, OsNRT2;1, OsNRT2.3a, OsNRT2.3b, OsNRT2;3a, OsNRT2.5	high-affinity Nitrate Transporter
LOC_Os05g06460	0.273923	0	78.9089	83.1763	88.1017	19.3466	22.4885	26.6967		dihydrolipoyl dehydrogenase, putative, expressed
LOC_Os07g07520	0.274415	0	58.8758	61.4187	62.6769	12.6545	18.2507	19.305	OsFbox345, Os_F0495	OsFBX217 - F-box domain containing protein, expressed
LOC_Os09g32440	0.275229	5.24087e-08	0.745876	0.882664	0.782322	0.150993	0.297368	0.215179		endonuclease/exonuclease/phosphatase family domain containing protein, expressed
LOC_Os03g26870	0.275695	0	58.0345	67.6413	45.6919	11.3851	13.3784	22.4818	SRWD5, OsWD40-73	Salt responsive WD40 protein 5
LOC_Os01g11300	0.276467	0	2.50561	2.61628	2.4178	0.574856	0.77565	0.733969		cytochrome P450, putative, expressed
LOC_Os08g35090	0.276725	0	20.2987	22.1907	21.7697	4.46301	6.83322	6.48586		OsSub56 - Putative Subtilisin homologue, expressed
LOC_Os08g39570	0.277079	3.14369e-11	0.871949	0.758719	0.803701	0.213957	0.223079	0.237478		Leucine Rich Repeat family protein, expressed
LOC_Os12g40750	0.278914	0	10.09	15.0804	18.7796	3.10391	4.90658	4.24777		pectinesterase inhibitor domain containing protein, putative, expressed
LOC_Os03g31690	0.279104	0	26.1298	23.8149	22.1325	6.51358	7.29669	6.30679		GCN5-related N-acetyltransferase, putative, expressed
LOC_Os05g34780	0.279432	0	11.4777	10.0344	7.155	2.21939	2.62827	3.16286		retrotransposon protein, putative, Ty3-gypsy subclass, expressed
LOC_Os03g19540	0.280889	0.00199162	1.33113	1.69208	2.24601	0.17574	0.610777	0.693547		expressed protein
LOC_Os03g37570	0.280921	0	17.8934	19.4553	21.9787	4.59463	5.9046	6.16712		expressed protein
LOC_Os10g36420	0.282047	0	4.04226	4.04493	4.59309	1.27859	1.28867	1.00918	OsYAB3, OsYAB4, TOB3	YABBY gene
LOC_Os07g05174	0.28231	4.79808e-05	3.42433	2.35465	5.43128	0.929915	1.23399	1.00087		expressed protein
LOC_Os01g16170	0.282383	0	27.1538	29.972	19.6763	5.62694	7.87701	8.18361		PQ loop repeat domain containing protein, expressed
LOC_Os04g46950	0.282978	0.000521132	1.07675	1.12431	1.84044	0.444019	0.420864	0.278774		expressed protein
LOC_Os01g04160	0.28349	0	43.1748	50.962	43.7321	11.1627	14.7816	13.1401		expressed protein
LOC_Os03g59240	0.284588	0	46.9323	45.9406	50.0522	10.26	14.5118	15.903		carboxyl-terminal peptidase, putative, expressed
LOC_Os06g46910	0.285733	0	3.01097	3.92995	3.57608	0.694685	1.02804	1.28233		ZOS6-07 - C2H2 zinc finger protein, expressed
LOC_Os02g53030	0.28715	1.50526e-05	2.04323	2.19274	2.2026	0.459582	0.539074	0.850177	OsRLCK84	mitogen-activated protein kinase kinase kinase 1, putative, expressed
LOC_Os04g55130	0.287233	0	11.1583	10.486	11.0794	2.56003	4.23928	2.60003		expressed protein
LOC_Os08g18880	0.288162	1.11321e-08	1.54262	1.84939	1.34833	0.549387	0.331627	0.484974	OsWD40-158	WD domain, G-beta repeat domain containing protein, expressed
LOC_Os01g73110	0.288442	0	50.3987	57.7439	46.845	8.88255	12.4691	23.3533		expressed protein
LOC_Os06g06440	0.288541	0	13.9189	15.4413	8.97093	4.23475	4.03615	2.78922	OsABCC15, OsMRP15	ABC transporter, ATP-binding protein, putative, expressed
LOC_Os10g30450	0.288957	0	66.8364	73.0666	66.6904	21.3633	18.1626	20.1707		heavy-metal-associated domain-containing protein, putative, expressed
LOC_Os01g41950	0.29089	0.00924941	0.348588	0.400383	0.34734	0.123492	0.0735756	0.121838		expressed protein
LOC_Os05g39000	0.291013	0	5.46306	5.65088	3.65288	1.14048	1.63953	1.51733		KIP1, putative, expressed
LOC_Os04g40410	0.291103	0	18.6203	17.8467	22.2265	4.14919	7.03907	5.89759	OsNAR2.2, OsNRT3.1B	high affinity nitrate transporter, putative, expressed
LOC_Os03g11320	0.291156	0	119.884	119.624	107.032	28.2915	38.608	33.9978		heparanase-like protein precursor, putative, expressed
LOC_Os09g34300	0.291337	0	61.2231	66.952	63.6303	16.5213	20.6943	18.6644	OsITPK6, OsITP5/6K-6, ITP5/6K-6	inositol 1,3,4-trisphosphate 5/6-kinase gene
LOC_Os04g51610	0.292137	0	71.0775	68.2918	52.3162	13.742	20.5973	21.6591	osACA11, OsACA6, OsACA5, OsPM4ATP8	calcium-transporting ATPase, plasma membrane-type, putative, expressed
LOC_Os08g31340	0.292719	0	9.66871	8.98987	14.2621	2.38611	3.4974	3.753		heavy metal-associated domain containing protein, expressed
LOC_Os01g24780	0.293164	2.31071e-07	1.51289	1.41851	1.45728	0.500022	0.293254	0.493325		cytochrome P450, putative, expressed
LOC_Os09g20390	0.293221	0	16.4514	16.5506	17.3152	4.5177	3.86487	6.3715	OsTPP7	uncharacterized glycosyl hydrolase Rv2006/MT2062, putative, expressed
LOC_Os04g56580	0.293341	0	86.8875	96.798	82.029	26.6234	26.8641	24.4574	OsIPK1, IPK1	Inositol 1,3,4,5,6-Pentakisphosphate 2-Kinase Gene
LOC_Os06g40750	0.294133	1.1767e-05	2.69252	2.35377	2.56138	1.01407	0.660818	0.562777		expressed protein
LOC_Os12g40760	0.294203	0	15.5846	19.0556	24.0634	4.69127	4.76901	7.8105		expressed protein
LOC_Os01g53370	0.294926	0.00687775	0.615863	0.555374	0.880849	0.170009	0.295429	0.139777		anthocyanidin 5,3-O-glucosyltransferase, putative, expressed
LOC_Os03g26210	0.295002	0	28.7996	30.3719	25.5099	9.23167	7.54413	8.20544	OsIRO3, IRO3, OsbHLH063, bHLH063, bHLH63	rice bHLH protein gene
LOC_Os08g13780	0.295031	9.43106e-11	3.22945	3.89535	3.67926	0.789019	1.17523	1.22328	OsPUB69	U-box domain-containing protein, putative, expressed
LOC_Os06g02490	0.295881	0	77.77	79.7707	78.2453	22.1393	20.2954	27.3299	OsACBP2, ACBP2	acyl-CoA-binding protein
LOC_Os02g26700	0.295981	0	455.935	425.458	526.682	112.92	132.53	171.314	OsARP, OsCTP	cation transport regulator-like protein 1, putative, expressed
LOC_Os11g02440	0.297019	0	35.3946	35.5262	35.0567	12.6648	10.8533	7.95928	CHI	chalcone--flavonone isomerase, putative, expressed
LOC_Os12g40380	0.297235	0	26.4529	33.8988	34.5557	7.78913	10.5745	9.84617		expressed protein
LOC_Os12g02370	0.29729	0	19.004	18.478	19.6583	5.86771	6.85387	4.26567	CHI	chalcone--flavonone isomerase, putative, expressed
LOC_Os01g52100	0.297608	0	41.0769	44.8776	41.1701	9.90309	12.5379	15.3924		DUF581 domain containing protein, expressed
LOC_Os03g49400	0.297779	0	45.3455	45.2008	25.9776	10.902	12.7377	11.0587		ethylene-insensitive protein, putative, expressed
LOC_Os06g48720	0.298461	3.24847e-10	5.50595	6.18116	2.26994	1.48185	1.44426	1.23952	OsHMA2, osHMA2, OsHMA2v	heavy metal ATPase 2
LOC_Os01g57420	0.29869	0	35.6307	37.4386	33.3741	8.13465	11.4482	12.2108		diacylglycerol kinase, putative, expressed
LOC_Os05g34700	0.298845	0	115.406	121.811	136.046	28.3523	32.4825	50.7128	OsGELP67, OsGELP67a, OsGELP67b	GDSL-like lipase/acylhydrolase, putative, expressed
LOC_Os06g19200	0.299568	6.36013e-07	7.05878	6.09489	7.97322	1.78619	1.28932	3.25343		expressed protein
LOC_Os03g16709	0.300165	4.89018e-11	4.5343	4.0484	4.61801	1.19727	1.38702	1.37811		expressed protein
LOC_Os06g06900	0.300514	0	23.9538	25.9965	27.3795	6.07094	7.52408	9.64369	OsbHLH108, OsbHLH108/SPT, bHLH108, SPT	helix-loop-helix DNA-binding domain containing protein, expressed
LOC_Os03g60509	0.300515	0	183.04	216.838	277.022	71.7713	64.6798	66.9677	gh1, GH1, OsCHI, Cfi, CHI	golden hull and internode 1;chalcone isomerase gene
LOC_Os06g47250	0.301359	0	3.34798	3.64896	3.07583	1.13783	0.799495	1.09819		DUF292 domain containing protein, expressed
LOC_Os10g31990	0.301473	0	6.3802	6.57628	3.97335	1.74506	1.69569	1.66313		retrotransposon protein, putative, unclassified, expressed
LOC_Os05g29920	0.301607	0	173.02	180.291	186.371	49.9916	58.1752	54.6051		expressed protein
LOC_Os05g34790	0.30184	0	12.7481	13.0762	13.2923	3.03609	4.35261	4.41825		GYF domain containing protein, putative, expressed
LOC_Os02g15930	0.30216	0	15.4548	16.357	16.1732	4.15021	6.32431	4.02463		expressed protein
LOC_Os05g48990	0.302507	3.71164e-08	1.49224	1.81254	1.53322	0.616498	0.482087	0.364945	OsWOX9C, DWL2	homeobox domain containing protein, expressed
LOC_Os06g23274	0.30389	0	12.7873	12.8607	10.7638	3.40751	3.92526	3.7324		zinc finger, C3HC4 type, domain containing protein, expressed
LOC_Os07g37610	0.305098	0	110.437	122.344	85.2396	31.3926	34.3768	31.2582	GD1	germination defective1;B3 domain transcriptional repressor
LOC_Os05g29810	0.30543	0	357.916	423.847	402.25	107.106	99.555	154.971	OsERF#061, OsERF061, OsERF61, AP2/EREBP#093, AP2/EREBP93	AP2 domain containing protein, expressed
LOC_Os06g48065	0.305691	0	13.5555	13.9754	15.5349	4.24617	4.21639	4.70228		Zinc finger, C3HC4 type domain containing protein, expressed
LOC_Os02g31140	0.30581	0	8.52175	8.65234	10.6171	2.23979	2.73278	3.52626	CFL1	curly flag leaf1
LOC_Os02g58720	0.307296	0	37.4719	42.0912	45.4167	10.6506	14.9794	12.7759	prx32	peroxidase precursor, putative, expressed
LOC_Os05g35070	0.307497	0	17.9402	18.9803	15.4095	4.11942	5.04621	6.92564		DUF630/DUF632 domains containing protein, putative, expressed
LOC_Os01g46340	0.309109	0	14.0452	15.443	13.1873	2.89464	3.87526	6.4215		chloroplast unusual positioning protein, putative, expressed
LOC_Os07g16970	0.309773	0	6.193	5.58344	5.20793	2.01584	1.58354	1.66191		rab GDP dissociation inhibitor alpha, putative, expressed
LOC_Os10g06580	0.310162	2.05841e-06	1.88543	2.23717	2.74161	0.954198	0.361775	0.813044		cyclin-dependent kinase G-1, putative, expressed
LOC_Os02g50805	0.310447	1.74649e-11	6.45138	6.3591	9.25673	2.14183	1.30721	3.40165		transposon protein, putative, CACTA, En/Spm sub-class, expressed
LOC_Os07g36400	0.31049	0	6.30304	6.61018	5.91817	1.53227	2.03331	2.28137		expressed protein
LOC_Os05g02980	0.310575	0	6.1742	5.13884	8.02448	1.63028	1.60536	2.77011		expressed protein
LOC_Os01g56510	0.311149	0	23.8392	23.6943	20.2132	6.24878	7.76982	7.0607		periplasmic beta-glucosidase precursor, putative, expressed
LOC_Os11g26780	0.311357	0	265.535	264.262	266.581	48.6143	96.3111	103.032	rab21, OsLEA28, OsRAB16D, OsRAB16b	dehydrin, putative, expressed
LOC_Os03g28170	0.311668	0	9.49207	10.767	12.4628	3.31777	3.67543	3.20514		expressed protein
LOC_Os09g27650	0.312182	0	12.6569	14.3789	14.5923	4.30452	4.42393	4.2671	OsIDD13	ZOS9-14 - C2H2 zinc finger protein, expressed
LOC_Os07g43970	0.312535	0	3.24035	3.49262	2.93274	0.952208	1.10312	0.965551		calmodulin-binding protein, putative, expressed
LOC_Os12g29520	0.312587	0	59.558	59.5093	55.0236	16.1455	17.8632	20.4098	OsARF24	auxin response factor 24
LOC_Os01g25240	0.312728	0	8.61244	8.30108	7.64353	1.77221	2.6468	3.26067		expressed protein
LOC_Os03g04920	0.312823	0	99.64	106.442	73.8057	31.4977	31.4993	24.5585	OsABCC13, OsMRP13, OsMRP5	multidrug resistance-associated protein, putative, expressed
LOC_Os04g41850	0.313618	0	8.71953	8.95058	6.7396	2.26754	2.78893	2.59887		NIN, putative, expressed
LOC_Os07g05024	0.313682	0	14.8935	13.0829	13.0708	4.03366	5.1323	3.70983		expressed protein
LOC_Os02g58170	0.31389	0	3.1572	3.83856	4.46821	1.55405	1.0726	0.971772		transposon protein, putative, unclassified, expressed
LOC_Os01g16870	0.31504	0	173.554	171.569	122.695	41.4567	51.4368	54.4879	OsAGO4a, AGO4-2	argonaute, putative, expressed
LOC_Os10g11100	0.315532	0	41.1073	36.0933	35.3014	9.73339	12.5712	13.1934		retrotransposon protein, putative, unclassified, expressed
LOC_Os04g41750	0.315805	0.00646351	0.942661	1.09366	0.695768	0.318048	0.405299	0.139462		expressed protein
LOC_Os05g49300	0.315886	0	45.2842	44.8993	45.8199	11.3867	14.5239	17.0509	OsISC5	iron-sulfur cluster assembly enzyme ISCU, mitochondrial precursor, putative, expressed
LOC_Os09g26370	0.316277	0	12.5246	16.5313	17.6292	5.37821	4.4059	4.98131		DUF581 domain containing protein, expressed
LOC_Os02g43010	0.316705	0	559.287	549.879	524.826	129.68	211.056	176.757	OsVPE3, REP-2, REP-2alpha, REP-2beta, OsaLeg2	vacuolar processing enzyme
LOC_Os03g51970	0.31685	0	54.436	56.4222	53.4124	13.6267	18.2716	20.1509	OsGRF6	growth-regulating factor
LOC_Os03g09020	0.317695	0	36.5247	39.0524	41.9836	12.4622	13.1567	11.7295		dehydrogenase, putative, expressed
LOC_Os06g08250	0.318682	0	9.72038	11.0506	14.2373	2.9691	4.85599	3.33141		zinc finger family protein, putative, expressed
LOC_Os09g37910	0.319407	0	188.384	187.686	180.205	46.7246	63.9908	66.9628		HMG1/2, putative, expressed
LOC_Os06g29679	0.319684	0.00293188	1.47207	2.5362	2.316	0.596002	0.543737	0.88203		expressed protein
LOC_Os07g03260	0.319907	0	4.4395	4.69212	3.09482	1.0686	1.08559	1.75714	OsCslC10, OsCSLC10	CSLC10 - cellulose synthase-like family C, expressed
LOC_Os05g51740	0.320281	0	2.32223	2.00046	1.68977	0.514176	0.643318	0.768182		receptor protein kinase CLAVATA1 precursor, putative, expressed
LOC_Os10g13850	0.320441	0	12.6382	13.0836	11.6696	1.53068	4.78783	5.66318		POEI17 - Pollen Ole e I allergen and extensin family protein precursor, expressed
LOC_Os07g06490	0.321284	0	11.5431	13.5891	12.3742	4.00911	4.0009	4.04018		DNA binding protein, putative, expressed
LOC_Os07g42250	0.322113	0	21.9015	22.3457	23.9851	6.19408	7.10021	8.68424	OsSTRL12, STRL12	strictosidine synthase, putative, expressed
LOC_Os08g23290	0.322908	1.0954e-08	1.70639	1.31695	1.34881	0.4756	0.417581	0.518623		serine/threonine-protein kinase BRI1-like 2 precursor, putative, expressed
LOC_Os06g43044	0.323168	1.39719e-11	2.90618	3.82128	4.74163	1.38	1.28738	1.03906	OsGELP87	GDSL-like lipase/acylhydrolase, putative, expressed
LOC_Os09g08370	0.323738	0	10.6555	10.8136	10.1401	2.93868	3.91684	3.37757		retrotransposon protein, putative, Ty3-gypsy subclass, expressed
LOC_Os05g47790	0.324009	0	6.74839	7.50601	5.80099	1.97493	2.38426	2.13894		expressed protein
LOC_Os02g52630	0.324439	0	3.07384	3.49364	3.93732	0.963672	1.00476	1.43973		xyloglucan fucosyltransferase, putative, expressed
LOC_Os06g40160	0.324506	0.0030263	1.99026	1.40779	1.68348	0.454889	0.745303	0.448797		expressed protein
LOC_Os06g06760	0.324597	0	19.5788	20.6445	14.2336	5.69206	6.30957	5.67494	OsPUB70, PUB70, OsRLCK197	protein kinase, putative, expressed
LOC_Os10g35604	0.325867	0	3.5069	3.89482	3.67826	1.00035	1.17758	1.43267		expressed protein
LOC_Os03g04710	0.327024	0	67.4928	66.2709	80.7073	20.7187	27.793	21.6254		expressed protein
LOC_Os03g01160	0.327222	0	1.93089	2.22942	2.02524	0.563772	0.607403	0.852874	OsPUB50, OsRLCK93	protein kinase family protein, putative, expressed
LOC_Os06g10310	0.327917	3.84228e-11	3.86965	4.14286	4.46975	0.942013	1.29234	1.85879	OsGRF2	growth regulating factor
LOC_Os03g30060	0.328459	9.84559e-06	1.65134	1.68322	2.06193	0.358168	0.746878	0.66748		expressed protein
LOC_Os04g57610	0.329174	0	30.477	31.5285	23.4001	9.14024	9.42483	9.54829	OsARF8, OsARF12, ARF12	auxin response factor
LOC_Os01g52690	0.329676	0	313.639	347.96	288.939	81.0321	137.147	95.1903		retrotransposon protein, putative, unclassified, expressed
LOC_Os10g40610	0.330459	0	8.42228	8.23511	10.57	2.61167	3.03129	3.35456		flavin-containing monooxygenase family protein, putative, expressed
LOC_Os08g39210	0.331221	0	2.95537	2.88519	2.29333	0.729602	0.83678	1.12774		OsWAK74 - OsWAK receptor-like protein kinase, expressed
LOC_Os05g10990	0.331341	1.86317e-05	3.77334	3.37715	4.52311	1.36404	1.51701	0.986899		expressed protein
LOC_Os01g11960	0.332499	0	29.899	29.8251	30.2165	7.72444	10.096	12.0847		histone-lysine N-methyltransferase ATX5, putative, expressed
LOC_Os08g34240	0.33303	0	14.8658	19.6056	19.9129	5.34799	5.63902	7.12459	OsCIPK06, CIPK6, OsCIPK6	CAMK_KIN1/SNF1/Nim1_like.33 - CAMK includes calcium/calmodulin depedent protein kinases, expressed
LOC_Os01g41510	0.333344	2.61974e-10	3.30799	4.58829	3.46963	1.34931	1.35474	1.08472	OsCBL5	calcineurin B, putative, expressed
LOC_Os04g08190	0.334295	0	17.6504	18.6419	15.1555	4.31235	6.47073	6.41566		expressed protein
LOC_Os08g42910	0.334699	0	18.7754	18.4225	17.4827	6.55753	5.80824	5.93581		peptidase, M24 family protein, putative, expressed
LOC_Os01g72210	0.334961	0	33.5695	31.4445	24.9864	8.92716	11.6491	9.57033	OsEnS-22, OsOSCA2.5, OsIOSCA2.5, OsDDP2, DDP2, OsDDP2.1, OsDDP2.2	early-responsive to dehydration protein-related, putative, expressed
LOC_Os05g34550	0.334986	0	13.6392	14.1839	13.977	3.63789	5.17403	5.19049	OsMLO9, MLO9	MLO domain containing protein, putative, expressed
LOC_Os03g16920	0.33521	0	40.9063	41.0487	33.2739	15.2029	13.6476	9.77533	HSP70, OsEnS-45	DnaK family protein, putative, expressed
LOC_Os03g04770	0.335217	0	69.9816	73.5277	65.4769	19.2894	23.5618	27.2046	OsBamy2, Bamy2	beta-amylase, putative, expressed
LOC_Os06g42470	0.335284	0.00933947	2.778	2.73955	4.93718	0.390534	2.03592	1.07885		expressed protein
LOC_Os12g06010	0.336409	0	4.783	4.449	5.0564	0.965189	1.58938	2.25218		bZIP transcription factor
LOC_Os08g05830	0.336483	0	73.0415	73.5618	80.8498	20.1613	27.6945	28.6782		transaldolase, putative, expressed
LOC_Os10g32470	0.336717	3.45805e-10	1.94249	1.52644	1.84837	0.385123	0.845354	0.559949		expressed protein
LOC_Os10g37350	0.336855	3.86632e-05	4.35871	5.72155	8.09843	2.01683	2.36567	1.74109		expressed protein
LOC_Os03g57260	0.337101	0	6.53348	8.35511	8.62366	2.26628	2.32417	3.33556		GRF zinc finger family protein, expressed
LOC_Os04g28300	0.337128	0	3.93952	4.5042	3.04708	1.02472	1.48649	1.36265		Rf1, mitochondrial precursor, putative, expressed
LOC_Os03g29960	0.337581	0	69.9452	73.7506	53.0802	19.2124	21.7684	25.447		DEK C terminal domain containing protein, expressed
LOC_Os10g36180	0.337866	0	67.4909	73.7554	67.5614	16.4964	28.7615	25.2912		expressed protein
LOC_Os08g20410	0.339969	0.00254437	1.32051	1.18186	1.18717	0.42962	0.447938	0.37677		expressed protein
LOC_Os03g52760	0.340474	0	16.1086	19.5372	20.3724	5.67534	6.37501	7.02237	OsMIK, LPA	kinase, pfkB family, putative, expressed
LOC_Os12g33956	0.341657	0.00363572	0.858758	0.838837	0.63922	0.252354	0.380053	0.165983		maturase, putative, expressed
LOC_Os11g39030	0.343182	1.72274e-08	2.50347	3.36091	2.81335	0.769239	1.22664	0.982154		RNA recognition motif containing protein, putative, expressed
LOC_Os10g35980	0.343225	0	19.0242	17.6353	19.3566	5.18613	7.35986	6.68011	OsTET14	tetraspanin family protein, putative, expressed
LOC_Os01g22000	0.343425	1.49587e-07	1.698	2.38813	1.89001	0.736581	0.658274	0.657505		expressed protein
LOC_Os04g55570	0.343467	0	40.3617	39.3176	31.7737	10.1193	13.7067	14.4544		plant protein of unknown function DUF869 domain containing protein, expressed
LOC_Os01g32560	0.343545	0.00489492	2.04505	1.93519	3.01638	0.452805	0.674443	1.2764	OsCLE103, CLE103	expressed protein
LOC_Os09g01650	0.343622	0	5.87678	5.63596	5.02639	1.45518	1.81002	2.41801	OsFKBP59	peptidyl-prolyl cis-trans isomerase, FKBP-type, putative, expressed
LOC_Os03g18400	0.343939	0	6.36024	6.0586	8.30952	1.92002	2.59067	2.6186		expressed protein
LOC_Os02g46340	0.34471	0	4.98061	5.88488	6.50706	1.54776	2.25925	2.18148		RING-H2 finger protein ATL3J, putative, expressed
LOC_Os03g46570	0.344976	0	15.2479	15.6453	21.6784	6.6909	6.60411	4.84095	SIP31	protein binding protein, putative, expressed
LOC_Os12g03860	0.345504	0	14.253	15.417	12.9259	4.06497	6.52363	4.12849	OsZIFL10, Os-mfs2, mfs2	major facilitator superfamily antiporter, putative, expressed
LOC_Os08g32620	0.345563	0	13.5078	12.0267	15.693	3.71827	6.0575	4.47095		ES43 protein, putative, expressed
LOC_Os03g21970	0.34616	0	39.0723	37.2401	43.1735	11.2207	14.6238	15.5167	OsbHLH166	basic helix-loop-helix domain containing protein, expressed
LOC_Os03g02660	0.347033	0	8.55875	9.37028	9.98184	2.68295	3.90953	3.0935		expressed protein
LOC_Os05g35380	0.347084	0	15.9822	17.146	21.2095	4.58674	6.63352	7.63951		universal stress protein domain containing protein, putative, expressed
LOC_Os04g47420	0.348043	0.000537492	1.66777	1.41286	0.924138	0.382208	0.697381	0.314241	OsLHT7, LHT7, OsLHT5, LHT5	transmembrane amino acid transporter protein, putative, expressed
LOC_Os03g06860	0.348221	0	8.96693	9.38802	6.73947	2.32971	3.41584	2.99285		transposon protein, putative, unclassified, expressed
LOC_Os02g45054	0.348798	0	18.1491	17.3068	17.4774	5.90853	6.4778	6.07671	OsIDD4, IDD4, SID1	ZOS2-15 - C2H2 zinc finger protein, expressed
LOC_Os01g19480	0.349548	0	15.5176	17.2262	17.4085	4.43269	7.76611	5.33186		kelch motif family protein, putative, expressed
LOC_Os12g38140	0.349783	0	156.136	196.411	229.2	53.3377	72.6576	77.4901		expressed protein
LOC_Os01g22380	0.349786	0	38.2417	42.8116	49.5954	11.015	13.1022	21.5819		expressed protein
LOC_Os12g43340	0.349808	0.0045762	2.14325	1.74837	1.61574	0.610133	0.848196	0.468193	OsADF11	actin-depolymerizing factor, putative, expressed
LOC_Os04g30420	0.350772	0	4.10807	4.28952	5.37575	1.78205	1.48642	1.56283		dehydrogenase, putative, expressed
LOC_Os10g40040	0.350861	0	125.044	141.499	142.277	32.0661	50.3173	61.0556		expressed protein
LOC_Os09g34960	0.350896	0	50.7451	52.3211	49.7761	15.427	18.9628	19.2419		hydroxymethylglutaryl-CoA synthase, putative, expressed
LOC_Os10g36626	0.351612	0	23.8517	21.7167	27.9604	6.76652	10.1035	8.98362		expressed protein
LOC_Os03g44380	0.351733	0	4.03136	4.49296	3.96545	1.03597	1.91781	1.43928	OSNCED1, OsNCED-1, OsNCED3, OsNced3, NCED3	9-cis-epoxycarotenoid dioxygenase
LOC_Os06g04540	0.352245	0	21.1883	22.5168	22.1359	7.23339	8.07104	7.88773	dp1, pa	depressed palea1
LOC_Os01g70860	0.352762	0	7.67334	7.40021	7.9365	2.31926	2.92426	2.87355	Pir7a	esterase, putative, expressed
LOC_Os04g23630	0.353184	0	5.12371	5.39758	4.65753	1.93616	1.94661	1.47815		expressed protein
LOC_Os03g11140	0.353238	0	1.9656	1.83897	1.4349	0.557072	0.696988	0.596721	Spin6.3	pleckstrin homology domain-containing protein-related taxo, putative, expressed
LOC_Os11g05494	0.354068	1.12707e-05	6.5758	4.39869	9.16023	1.76797	2.38552	2.97557		expressed protein
LOC_Os05g08110	0.354267	2.47132e-07	3.62052	3.47056	5.72727	1.62204	1.37802	1.54105		early light-induced protein, chloroplast precursor, putative, expressed
LOC_Os11g02090	0.354304	0	13.9479	15.5472	13.7652	5.00378	5.0929	5.23062		expressed protein
LOC_Os12g12854	0.354371	3.49298e-12	2.72925	3.20977	3.28446	1.16316	1.27339	0.831994		expressed protein
LOC_Os09g25540	0.354462	0	3.69933	4.62532	2.94753	1.12492	1.49124	1.3794		receptor-like protein kinase 2 precursor, putative, expressed
LOC_Os06g01250	0.354925	0	83.118	87.8196	100.369	29.7082	35.8347	30.7506	CYP93G2, OsF2H	Flavanone 2-Hydroxylase;Cytochrome P450 93G2
LOC_Os07g47090	0.35497	0	11.4533	12.4575	11.4214	3.46907	5.17365	3.89918		KIP1, putative, expressed
LOC_Os03g29760	0.355432	0	41.5475	42.8525	41.1813	14.4176	14.05	16.168	OsHAP2E, NF-YA, CBF-B, NF-YA2, OsNF-YA2, NFYA2	heme activator protein gene; nuclear factor Y; CCAAT binding factor
LOC_Os03g44290	0.356012	0	27.7444	28.9699	32.7332	7.69288	10.7182	13.4334	OsEXPB12, OsaEXPb1.17	expansin precursor, putative, expressed
LOC_Os09g37040	0.356553	0	12.8182	13.361	13.4211	4.57385	4.69804	4.84769		DUF630/DUF632 domains containing protein, putative, expressed
LOC_Os10g34230	0.357201	2.98755e-08	1.41471	1.81009	1.48384	0.463871	0.820099	0.397964	OsCKX3, ckx3	cytokinin dehydrogenase precursor, putative, expressed
LOC_Os07g47250	0.357329	0	7.42331	7.87306	7.2229	2.71723	2.43892	2.89065		lipase; Lipolytic enzyme
LOC_Os12g38150	0.357889	0	621.777	708.9	871.442	241.704	268.993	277.417		osmotin, putative, expressed
LOC_Os07g45530	0.357977	0.001071	0.363525	0.349615	0.270915	0.0968299	0.131246	0.124193		retrotransposon protein, putative, unclassified, expressed
LOC_Os08g39890	0.358166	0	5.26703	5.29598	5.5244	1.38216	1.7499	2.6299	OsSPL14, SPL14, IPA1, WFP/IPA1, OsSPL14/WFP/IPA1	squamosa promoter binding protein-like 14
LOC_Os12g02050	0.358875	0	11.6786	11.8477	10.4496	3.97763	3.73834	4.47709		expressed protein
LOC_Os07g01250	0.359389	0	71.8241	71.0006	66.0807	21.406	24.8694	28.8028		tobamovirus multiplication protein, putative, expressed
LOC_Os06g48960	0.359408	0	14.8179	10.7252	15.4831	4.37453	6.27884	4.09174		AIG2-like family domain containing protein, expressed
LOC_Os10g37340	0.359449	0	37.8471	35.1775	47.2362	11.43	17.4938	14.3037	RRJ1	cystathionine gamma-synthase, putative, expressed
LOC_Os05g02580	0.359908	0	8.58727	9.62876	6.90347	1.99514	3.3826	3.66298		expressed protein
LOC_Os04g35880	0.360539	0	7.14016	8.33088	5.09377	2.42855	2.5321	2.45377		retrotransposon protein, putative, unclassified, expressed
LOC_Os03g24040	0.361238	0	40.9188	47.1743	50.4436	12.8602	17.6676	19.517	OsDIS1	SINA E3 ligase
LOC_Os04g57200	0.362718	0	26.4431	26.1601	31.71	11.4647	9.10957	10.0077		heavy metal transport/detoxification protein, putative, expressed
LOC_Os12g37580	0.362843	2.44509e-11	1.92002	1.72315	1.2316	0.481836	0.653094	0.633844	OsABCC17, OsMRP17	ABC transporter, ATP-binding protein, putative, expressed
LOC_Os04g49620	0.363313	0	16.5327	20.5486	20.3267	6.16785	6.95794	7.73126		DUF581 domain containing protein, expressed
LOC_Os01g39600	0.363519	0	12.4439	14.316	12.5039	3.66967	4.6114	5.99204		expressed protein
LOC_Os08g33440	0.364502	0	49.9424	56.7211	57.1963	16.5467	19.8162	23.3643		2-oxo acid dehydrogenases acyltransferase domain containing protein, expressed
LOC_Os12g05210	0.364531	0	95.5168	91.9493	103.597	22.5748	41.3512	42.1755		expressed protein
LOC_Os01g41900	0.364835	5.23948e-11	5.60702	7.81835	7.89003	1.69202	1.91118	4.1734		Myb transcription factor, putative, expressed
LOC_Os08g16660	0.365346	0	17.46	21.2324	22.6238	6.38937	8.44772	7.56457		aspartic proteinase nepenthesin precursor, putative, expressed
LOC_Os03g03790	0.365495	0.00375005	0.881465	0.920398	1.19646	0.262413	0.574562	0.258898		AMP-binding domain containing protein, expressed
LOC_Os05g44900	0.365603	0	51.7036	57.3827	62.8542	14.3411	18.9236	29.5971		expressed protein
LOC_Os10g42400	0.365808	1.04105e-07	2.59951	2.10141	1.93495	0.424383	0.914452	1.08862		expressed protein
LOC_Os06g49050	0.366625	0	4.17642	4.17129	3.28537	1.33252	1.84446	1.08801		hAT dimerisation domain containing protein, expressed
LOC_Os04g52970	0.366974	0	9.85264	9.95325	3.68274	2.90531	2.63469	3.07972		NBS-LRR disease resistance protein, putative, expressed
LOC_Os05g49140	0.367371	0	39.3724	40.1711	33.3665	14.0118	13.7694	13.6987	OsMPK7, OsMAPK44	mitogen-activated protein kinase
LOC_Os08g28470	0.367906	0.00169969	1.33398	1.31096	1.39916	0.357413	0.621086	0.509349		disease resistance protein RPM1, putative, expressed
LOC_Os03g07880	0.367948	0	58.6695	72.4226	69.5572	20.308	23.3433	30.1772	OsHAP2C, NF-YA, CBF-B, NF-YA1, OsNF-YA1, NFYA1	nuclear transcription factor Y subunit, putative, expressed
LOC_Os07g12630	0.368278	0	26.1043	27.5245	25.2708	7.3642	8.25694	13.4358	OsTFIIS	transcription elongation factor protein, putative, expressed
LOC_Os03g26044	0.368914	0	10.514	11.7922	9.01111	3.24346	3.67422	4.6357		CSLA5 - cellulose synthase-like family A%3B mannan synthase, expressed
LOC_Os01g48060	0.369108	0	34.8287	34.293	28.8644	9.17437	13.8395	13.1536	OsARF2, OsETT2, ARF3a	OsETTIN2; auxin response factor
LOC_Os01g47280	0.36953	0.00233394	2.18538	2.6846	3.10117	0.455413	0.94966	1.5405		expressed protein
LOC_Os04g53930	0.369552	0	5.19324	6.04447	6.89619	1.80843	2.51404	2.37895		organic cation transporter protein, putative, expressed
LOC_Os02g01760	0.369599	4.3802e-09	5.19171	7.4438	6.82707	1.80394	2.37151	3.01789		diphosphomevalonate decarboxylase family protein, expressed
LOC_Os02g43710	0.369612	0	9.11315	11.0647	11.2812	3.32499	3.85816	4.4445		enoyl-CoA hydratase/isomerase family protein, putative, expressed
LOC_Os06g30750	0.369774	0	212.166	217.761	237.508	75.117	85.1577	86.5255		reticulon domain containing protein, putative, expressed
LOC_Os04g18090	0.370153	0	267.688	294.9	261.544	74.2085	99.1335	131.712	H1	histone H1, putative, expressed
LOC_Os02g09260	0.370824	0	11.4341	10.991	12.6277	4.49319	5.78497	2.72026		cytochrome P450 71A1, putative, expressed
LOC_Os06g02560	0.371418	0	16.8028	17.1551	17.4607	5.85814	6.40345	6.83619		growth-regulating factor
LOC_Os01g10680	0.371911	0	8.85107	9.03432	10.5614	2.99468	3.46347	4.12151		GIL1, putative, expressed
LOC_Os05g16640	0.372146	0	25.9404	26.6758	22.2817	7.53878	9.91339	10.4208		DUF630/DUF632 domains containing protein, putative, expressed
LOC_Os01g72340	0.37224	0	23.0342	23.3464	16.4558	7.67666	7.91487	7.79868		beta-galactosidase, putative, expressed
LOC_Os02g55970	0.373039	0	6.93809	7.35685	5.00184	2.79453	2.32715	2.07678		ANTH, putative, expressed
LOC_Os03g44300	0.373135	0	26.5241	29.1943	32.0313	10.3711	11.1776	11.1938		transketolase, putative, expressed
LOC_Os09g39930	0.373675	0.00729091	1.00131	0.882169	1.01741	0.285048	0.330224	0.468718	YK12, OsRLCK284	tyrosine protein kinase domain containing protein, putative, expressed
LOC_Os04g39780	0.373733	0	5.29316	6.05854	3.98128	1.67474	1.87256	2.18314	DWA1	AMP-binding enzyme family protein, expressed
LOC_Os12g32680	0.37437	0.0452447	0.461469	0.546098	0.258143	0.124557	0.211036	0.13825		NB-ARC domain containing protein, expressed
LOC_Os12g29980	0.37451	0	10.0032	9.1083	8.68086	2.89287	3.20472	4.31092	OsGRF7	growth regulating factor
LOC_Os05g43920	0.374654	0	17.802	19.7823	17.6173	7.1038	7.57312	6.00461	OsARF14, OsETT4, ETT4	auxin response factor
LOC_Os04g39420	0.374716	0	35.1743	37.576	34.8616	12.2049	14.7362	13.3828	OsPFK03, PFK03, PFK3	6-phosphofructokinase 2, putative, expressed
LOC_Os06g46350	0.375212	3.49298e-12	5.42359	6.23385	6.83515	2.681	2.6622	1.59545	dep3, OspPLAIIIdelta, pPLAIIIdelta	dense and erect panicle3
LOC_Os12g34092	0.375308	0.000246233	1.31743	1.34363	1.2854	0.496177	0.678999	0.305958		ribosomal protein S2, putative, expressed
LOC_Os06g46995	0.37547	4.54088e-11	2.41331	3.03472	2.6401	0.78797	1.34189	0.906987		armadillo/beta-catenin repeat family protein, putative, expressed
LOC_Os08g37400	0.37662	0	6.64185	6.34077	7.96159	2.19519	2.66071	3.0321	OsZHD2	Zn-finger transcription factor
LOC_Os12g42230	0.376673	0	30.0492	33.2302	42.0003	12.5455	13.2885	13.822		transketolase, putative, expressed
LOC_Os01g62790	0.376865	0	12.245	16.6135	12.4071	5.28924	4.96602	5.29629	OsNTP3	expressed protein
LOC_Os01g57650	0.377065	0	6.22178	6.31359	8.18022	2.69051	2.46613	2.65448		ZOS1-12 - C2H2 zinc finger protein, expressed
LOC_Os08g23810	0.377156	0	99.9795	102.951	101.539	34.0398	39.7984	40.9946		enoyl-acyl-carrier-protein reductase NADH, chloroplast precursor, expressed
LOC_Os03g61160	0.377372	0	42.4586	62.276	50.8525	14.5057	19.0745	25.134	OsEnS-58	expressed protein
LOC_Os07g47510	0.377671	0	236.847	257.734	319.769	96.6259	99.5391	111.392		stress-related protein, putative, expressed
LOC_Os05g20930	0.377966	0.0174604	1.01519	1.42874	1.0185	0.402089	0.465814	0.440783		ZOS5-07 - C2H2 zinc finger protein, expressed
LOC_Os11g08200	0.378099	0.000853448	1.5159	1.10111	1.31345	0.333557	0.626001	0.526544	OsAsp1	eukaryotic aspartyl protease domain containing protein, expressed
LOC_Os05g30570	0.378161	0.00744291	1.14327	1.07439	1.07922	0.385732	0.442396	0.418623		heavy metal-associated domain containing protein, expressed
LOC_Os01g70260	0.378299	0	5.07904	5.62848	4.04133	1.61515	1.80724	2.15708		receptor-like protein kinase 2 precursor, putative, expressed
LOC_Os05g48416	0.378821	0	20.8911	21.101	19.2768	4.11856	9.16471	9.92669	OsEnS-79	lipase-related, putative, expressed
LOC_Os01g62290	0.378985	0	81.329	70.568	89.9381	34.859	39.0134	17.7796	OsMed37_1, Med37_1	DnaK family protein, putative, expressed
LOC_Os05g35480	0.379253	0	35.4079	38.4894	35.5946	13.0926	14.2452	14.1873		anthranilate phosphoribosyltransferase, putative, expressed
LOC_Os12g36220	0.379351	0	48.6257	56.118	72.7982	14.8172	28.3051	24.2283		inhibitor I family protein, putative, expressed
LOC_Os03g20350	0.379448	0.000139525	1.76093	1.79387	2.11727	0.869456	0.725221	0.557578		expressed protein
LOC_Os03g53910	0.379497	0	160.167	153.716	162.074	56.1959	64.9785	59.4496		tetratricopeptide repeat domain containing protein, expressed
LOC_Os01g68940	0.379608	0	33.3655	30.6509	44.1751	13.4719	12.1221	15.4764		ubiquitin family domain containing protein, expressed
LOC_Os12g43890	0.380169	7.81974e-07	2.71369	2.59342	2.21914	0.9311	0.873718	1.05642		GNS1/SUR4 membrane family protein, putative, expressed
LOC_Os04g21340	0.38048	1.39719e-11	4.35253	4.4321	3.92382	1.20151	1.44255	2.19124		expressed protein
LOC_Os01g69030	0.380537	0	15.144	14.2076	11.0917	5.03194	6.38373	3.97451	sps1, OsSPS1, SPS	sucrose-phosphate synthase, putative, expressed
LOC_Os06g10990	0.381275	9.70746e-07	1.91045	1.69053	2.37739	0.721048	0.717619	0.840736	BiP3	Hybrid sterility
LOC_Os08g10630	0.381594	0	18.1978	21.2331	17.6946	6.09614	7.58626	8.11634	OsZIP4	ZRT- and IRT-like protein; zinc-regulated zinc transporter
LOC_Os03g12260	0.382348	6.98597e-12	3.50595	3.48785	4.37218	1.76036	1.42754	1.15786		cytochrome P450 protein, putative, expressed
LOC_Os06g41020	0.382991	0	6.12869	8.28613	5.25585	1.69696	2.33943	3.4973		DUF1680 domain containing protein, putative, expressed
LOC_Os09g32760	0.383632	0	77.1017	78.2366	87.8743	26.8521	31.2425	35.2096		acyl-ACP thioesterase, putative, expressed
LOC_Os01g68660	0.384363	0	239.208	280.903	368.676	98.2139	123.751	119.652		cysteine proteinase inhibitor precursor protein, putative, expressed
LOC_Os04g59540	0.385306	0	18.8272	18.2049	11.5278	5.33782	7.28184	6.09074		phosphatidylinositol-4-phosphate 5-Kinase, putative, expressed
LOC_Os09g30210	0.385882	0	3.36605	3.84682	3.91971	1.36819	1.28667	1.64101		expressed protein
LOC_Os05g39840	0.386437	0	21.0362	22.19	18.9604	6.39862	8.68705	8.94555		expressed protein
LOC_Os02g21260	0.386521	0	24.5843	23.9685	26.513	8.52859	10.0632	10.4227	OsFbox087, OsFbox87, Os_F0536	OsFBL8 - F-box domain and LRR containing protein, expressed
LOC_Os02g05830	0.386819	0	411.806	405.819	455.181	161.768	155.234	175.344	RbcS1, OsRBCS1, OsRbcS1	small subunit of Rubisco
LOC_Os05g37340	0.387246	0	7.05023	7.69126	6.20275	2.258	2.53195	3.32062		expressed protein
LOC_Os03g59110	0.387426	5.82979e-09	3.64585	3.35285	4.06958	0.77868	1.90615	1.60331		pheophorbide a oxygenase, chloroplast precursor, putative, expressed
LOC_Os07g37410	0.387454	0.000488159	2.27721	2.70804	2.65386	1.08845	0.734317	1.13704		expressed protein
LOC_Os05g40890	0.387702	0	14.2485	11.8018	15.3231	4.25968	5.83713	5.94373		expressed protein
LOC_Os01g16152	0.387841	0	65.0125	73.1845	83.6735	25.313	28.5548	32.1826	OsPrxII F, PrxII F, OsPrxIIF, PrxIIF	peroxiredoxin, putative, expressed
LOC_Os05g43690	0.387994	0	150.455	154.648	180.791	53.1893	68.0824	67.2524		glucan endo-1,3-beta-glucosidase-like protein 3 precursor, putative, expressed
LOC_Os04g45750	0.38882	0	30.2137	35.0432	29.6062	11.0515	12.3916	13.4417	GT-2	expressed protein
LOC_Os10g40120	0.39039	0.00444739	2.09674	1.71341	1.19521	0.645912	0.625348	0.682781	OsPUB58	U-box domain containing protein, expressed
LOC_Os01g54570	0.391257	7.63042e-08	4.63499	4.42147	4.92149	1.85341	2.41555	1.20001		DUF623 domain containing protein, expressed
LOC_Os10g02220	0.391405	8.73246e-11	2.37661	2.18674	2.27062	0.881246	1.01815	0.77545		peptide transporter PTR2, putative, expressed
LOC_Os04g34540	0.391522	1.08282e-10	5.65937	5.53709	7.33808	1.8944	2.06923	3.29305		expressed protein
LOC_Os02g51540	0.392151	0	17.6294	19.7049	18.7785	5.64875	7.62583	8.73012		eukaryotic aspartyl protease domain containing protein, expressed
LOC_Os01g66720	0.392352	0	19.8027	21.8747	25.72	9.50859	8.61075	8.32421		NADP-dependent oxidoreductase, putative, expressed
LOC_Os01g19970	0.392499	0	10.6249	13.34	13.3097	4.57169	5.71992	4.33863		MYB family transcription factor, putative, expressed
LOC_Os07g28260	0.39283	0	11.958	13.4383	10.6296	4.42233	4.73116	4.9986		expressed protein
LOC_Os12g42420	0.393022	0	47.0547	43.8813	36.2473	15.2987	17.7293	16.9578		DNA binding protein, putative, expressed
LOC_Os06g47350	0.393071	0	338.565	316.11	296.242	110.383	130.587	132.808		RNA polymerase I specific transcription initiation factor RRN3 family protein, putative, expressed
LOC_Os10g42490	0.393168	0	7.48317	7.78353	6.19724	2.12023	2.68324	3.63546	Roc3(t), Roc3, GL2-3	homeobox and START domains containing protein, putative, expressed
LOC_Os01g63210	0.393388	0	58.7586	61.6576	70.6606	28.0884	23.085	23.994		SOUL heme-binding protein, putative, expressed
LOC_Os04g35864	0.393527	0	7.57996	7.03087	7.02213	2.6483	2.59879	3.26605		DDT domain-containing protein, putative, expressed
LOC_Os02g51640	0.394195	0	20.0432	21.9203	20.4247	7.08294	8.68815	8.82206		expressed protein
LOC_Os06g02420	0.395915	0	456.009	458.127	557.107	175.678	205.8	201.009		ATOZI1, putative, expressed
LOC_Os01g42710	0.396428	0	14.3506	14.9726	10.1734	3.85814	5.80648	5.99292	OsLOL2, OsLSD5, OsLOL5, LOL5	zinc finger protein
LOC_Os11g40610	0.397477	0	12.6895	12.0225	14.6057	5.18644	4.42148	6.01998	ELF4_chr.11	EARLY flowering protein, putative, expressed
LOC_Os02g42870	0.398079	5.51945e-05	2.02595	1.87135	2.08408	0.512657	0.740098	1.12831	myb7	MYB family transcription factor, putative, expressed
LOC_Os08g17870	0.398224	0	20.6644	22.0261	20.2735	7.44549	10.4859	7.14236		reticulon domain containing protein, putative, expressed
LOC_Os05g35200	0.398583	0	12.4802	14.4701	10.4511	5.11353	4.50969	5.28434		glycosyl transferase, putative, expressed
LOC_Os04g35240	0.398703	0	56.6353	55.466	57.1534	19.2152	24.0784	24.1888	OsSAPK7	Stress-Activated Protein Kinase; Sucrose Nonfermenting1–Related Protein Kinase
LOC_Os04g24610	0.399187	0	17.5183	18.4106	18.0765	6.6386	7.49096	7.42866		expressed protein
LOC_Os05g19000	0.399857	2.28228e-05	1.60755	1.48108	1.42162	0.638093	0.598769	0.566592		expressed protein
LOC_Os02g45530	0.400058	0.0111955	0.873022	0.854608	0.858451	0.248528	0.431875	0.354178		HOTHEAD precursor, putative, expressed
LOC_Os02g28820	0.400258	1.08097e-07	2.95343	3.59082	2.33392	1.26948	1.15281	1.13127		expressed protein
LOC_Os06g43520	0.400325	0.0374042	0.579008	0.58299	0.628989	0.146515	0.240055	0.330407		cytochrome P450 71D7, putative, expressed
LOC_Os04g43990	0.40048	0	23.4813	22.9983	30.6381	8.69885	8.77236	13.4129	OsS40-13	DUF584 domain containing protein, putative, expressed
LOC_Os08g03690	0.400601	0	284.889	296.723	428.902	110.435	195.965	98.4123	OsLTP1.7, OsLtpI.7	LTPL24 - Protease inhibitor/seed storage/LTP family protein precursor, expressed
LOC_Os07g17210	0.400821	2.06086e-10	3.71435	3.63933	2.34818	1.28753	1.12764	1.47354		FAS1, putative, expressed
LOC_Os01g52514	0.401392	0	10.9886	12.803	13.6615	3.90789	5.19388	5.93163		B3 DNA binding domain containing protein, expressed
LOC_Os03g18220	0.401514	0	672.104	719.285	646.402	217.825	217.037	383.341	pdc2*, pdc2	pyruvate decarboxylase isozyme 2, putative, expressed
LOC_Os06g06610	0.40154	2.55302e-08	1.81493	2.19044	1.50806	0.715731	0.721372	0.776761		expressed protein
LOC_Os07g47480	0.401952	0	17.7335	19.3622	22.0822	7.00767	7.52009	9.25887		heavy metal-associated domain containing protein, expressed
LOC_Os06g48060	0.402531	0	7.59315	8.64587	11.3015	3.76963	3.77771	3.5386	OsENA2, OsABCI12	Bacterial-Type ABC Transporter
LOC_Os08g39590	0.40282	0	28.5983	32.7731	36.6841	9.95521	14.3034	15.2401	OsRLCK257	inactive receptor kinase At2g26730 precursor, putative, expressed
LOC_Os01g45760	0.402827	0.00198339	1.4236	1.13255	1.63537	0.651855	0.39348	0.643125	OsYUCCA1, OsYUC1	YUCCA-like gene
LOC_Os12g32970	0.403493	0	35.345	41.1371	47.9911	13.5657	23.0253	13.633		membrane associated DUF588 domain containing protein, putative, expressed
LOC_Os03g18520	0.403638	0	5.25622	5.12967	6.05356	2.29501	2.24784	2.09274		glucan endo-1,3-beta-glucosidase 9 precursor, putative, expressed
LOC_Os02g25870	0.403726	0	18.8471	14.2507	17.6182	6.52758	6.85865	7.08918		elongation factor Tu, putative, expressed
LOC_Os03g12280	0.404678	1.49786e-07	9.16185	10.566	11.9043	4.42911	3.31915	5.05258		expressed protein
LOC_Os01g41310	0.404685	5.80569e-08	2.4188	2.95765	2.10303	1.12749	1.04121	0.858131	OsFbox026, OsFbox26, Os_F0242	OsFBX18 - F-box domain containing protein, expressed
LOC_Os05g07960	0.405214	0	7.24129	7.78445	5.96073	2.35039	3.22447	2.92915		F-box protein interaction domain containing protein, expressed
LOC_Os07g29330	0.405632	0	25.4523	27.7516	24.7071	8.94114	10.6076	12.0544		serine/threonine-protein kinase CTR1, putative, expressed
LOC_Os02g50820	0.406729	0	48.0915	43.7976	40.6649	13.4683	20.8619	19.5834		nucleobase-ascorbate transporter, putative, expressed
LOC_Os01g66230	0.407018	0	5.74565	5.57333	6.43729	2.70956	2.77341	1.74415		csAtPR5, putative, expressed
LOC_Os10g30150	0.407462	1.22185e-08	256.755	292.534	355.021	77.856	81.843	208.773		universal stress protein domain containing protein, putative, expressed
LOC_Os02g01920	0.407657	0	54.8451	57.9099	56.6813	23.7572	23.6714	21.6433		GHMP kinases ATP-binding protein, putative, expressed
LOC_Os08g05470	0.407657	0	6.67302	7.45286	6.689	2.56493	3.432	2.4884		expressed protein
[truncated: 4,332 more rows]

## Sheet: Table S3
Supplemetal Table 3. Differential expression of the embyonic tissue specific genes in osnf-yb7
[truncated: 1,776 more rows]

## Sheet: Table S4
Supplemental Table 4. Differentially expressed transcription factors in the osnf-yb7 embryos.
[truncated: 504 more rows]

[truncated: 6 more sheets: Table S5, Table S6, Table S7, Table S8, Table S9, Table S10]
